# Supplementary material for: Tight bending of the Ndc80 complex provides intrinsic regulation of its binding to microtubules
Source: eLife. 2019 May 2;8:e44489. doi: 10.7554/eLife.44489 (PMC6516834; doi:10.7554/eLife.44489)
Supplement: Figure 1—figure supplement 1—source data 1. [file elife-44489-fig1-figsupp1-data1.xlsx]

## Sheet: Sheet1
Figure 1-supplement 1-source data 1
Residence times		Ndc80	Ndc80+100X Spc24/Spc25	Ndc80+500X Spc24/Spc25
		0.6	8	6.2
		0.5	2.3	1.6
		0.6	1.6	3.3
		0.1	0.2	0.3
		2.6	0.2	0.6
		0.2	0.3	0.5
		1.3	0.1	0.4
		1.3	12.7	1.8
		5.8	0.5	12.5
		0.1	0.1	0.1
		1.1	0.7	2.8
		0.1	0.2	1.9
		13.5	0.5	17.4
		0.9	13.3	3.1
		0.3	0.4	1
		1.6	0.3	0.8
		1.3	0.2	0.5
		1.7	0.3	49.3
		0.5	0.8	2
		14.1	5.2	0.1
		1.4	0.4	0.3
		1.2	0.5	0.4
		3	0.2	0.5
		0.6	19.7	4.8
		0.9	43.8	3
		0.6	3.7	0.9
		0.3	0.9	1.5
		0.1	0.1	0.2
		4.5	0.5	5.1
		0.1	1.9	0.1
		1.1	1.5	18.8
		2.7	5.2	0.1
		0.1	0.6	2.3
		0.1	7.3	0.4
		0.1	0.2	0.2
		0.1	0.8	0.2
		7.1	0.3	0.5
		3.5	0.3	0.1
		0.6	4.7	0.8
		1.6	0.6	0.1
		0.1	0.3	0.3
		0.5	19.4	0.2
		1	0.4	4
		0.2	1.8	0.8
		0.8	0.2	5.1
		0.4	1.3	0.1
		0.7	9.7	0.5
		0.3	4.1	0.4
		0.6	7.8	6.3
		0.2	0.1	10
		0.2	0.1	1.7
		0.2	1.1	0.5
		0.4	88.6	0.2
		0.2	0.5	1.2
		0.7	3.1	28.5
		1	0.2	18.4
		78.4	0.1	0.2
		17.3	0.6	1.6
		0.4	5.4	1.8
		1.7	31.5	0.8
		0.1	0.3	0.8
		1	14.3	0.1
		1.6	0.1	0.3
		8.6	0.9	0.3
		8	0.2	0.1
		2.4	0.3	1.5
		2.9	0.6	0.4
		2.7	0.2	1.6
		7.3	0.1	2.6
		2	0.6	0.1
		5.5	5.1	0.5
		10.5	50.3	1.2
		12.8	43	2.8
		0.1	1.9	0.3
		1.3	2.9	0.1
		2.8	2.1	1.2
		1.8	9.5	0.6
		0.1	2.8	0.3
		0.4	0.1	8.3
		0.4	0.9	0.6
		0.4	0.7	0.2
		1.7	1.1	2.2
		0.6	0.4	2.2
		0.1	83.2	28.3
		1.4	0.8	0.3
		1.5	2.1	0.1
		1.3	0.4	0.4
		0.1	20.1	2
		0.1	0.4	0.1
		66.4	0.4	0.4
		60.2	18.4	0.2
		1.8	0.3	0.1
		3.2	4.9	0.7
		0.9	3.7	0.5
		1.5	1.6	0.3
		0.1	4.2	0.3
		0.6	0.7	0.1
		0.2	2.3	1.4
		2.1	2	0.6
		1.6	1.6	16
		0.1	0.1	0.2
		0.1	0.6	8.7
		2.6	0.4	0.3
		0.1	0.3	0.3
		5.8	0.1	0.9
		7.5	10.5	0.3
		2.4	16.3	0.9
		0.5	2.9	0.4
		2.5	3.8	5.4
		0.1	0.9	0.4
		1.1	1.6	1.6
		0.1	0.5	5.4
		0.7	1.3	6.1
		0.2	0.1	49.3
		42.6	2	1
		2	0.2	0.3
		1.9	28.3	79.7
		0.3	0.3	0.5
		0.7	0.7	0.1
		0.1	5.5	0.7
		10.1	10.3	0.4
		1.3	0.1	10.4
		1.6	14.2	0.4
		1.3	5.4	0.4
		14.6	2.7	0.9
		4	0.2	1.6
		1	1.8	0.8
		36.6	0.1	1.5
		1	0.3	1.8
		0.6	0.2	0.8
		0.1	0.9	2.2
		92.2	0.1	0.4
		1	0.1	2.3
		3.2	18.4	1.4
		1.1	0.4	20.8
		0.1	1.5	27
		17.6	4.8	3.6
		0.2	13.9	4.1
		2.4	0.2	1.8
		0.1	10.9	2.1
		50.3	0.6	3.9
		9	0.1	0.1
		4.6	0.3	0.6
		11.4	0.2	2.8
		11	9.6	1.8
		3.5	0.5	5.5
		6.9	0.4	20.5
		0.1	10.1	0.3
		1.2	0.8	0.4
		0.1	0.3	1.2
		0.4	0.4	1.8
		7.3	0.3	0.1
		0.2	0.5	1.6
		0.4	1.2	1.9
		22.5	16.4	0.2
		0.4	1.3	5.6
		1.2	1	0.2
		6.5	1.7	11.9
		2.5	9.3	2.8
		0.2	1.2	2.4
		0.6	11.4	0.7
		5.7	1.8	2.9
		6.2	0.3	0.2
		0.3	2.7	0.2
		0.5	16.3	0.9
		12.1	0.1	1
		0.3	3.6	0.5
		3.5	0.6	0.1
		0.3	2.5	0.4
		0.9	5.8	0.1
		0.7	0.2	0.2
		0.1	0.1	0.7
		0.3	1.5	1.6
		2.5	1.4	1.2
		38.6	0.8	1
		5.6	2.1	0.8
		43.1	0.1	0.1
		23.2	36	11.6
		2	0.3	0.2
		37.7	0.9	2.7
		0.6	1.4	12.8
		15.9	5.8	0.3
		1.9	0.2	10.6
		4.6	0.4	0.6
		3.3	0.2	1.7
		0.1	0.2	0.1
		5.6	0.3	1.5
		13.8	0.4	0.7
		0.5	2.2	76.8
		0.5	1.7	0.4
		47.3	0.9	1.1
		2.9	0.9	1.2
		15.1	6.7	0.9
		3.7	28	0.8
		8.1	2.6	0.8
		0.5	1.8	0.6
		0.2	79	0.6
		7	0.3	0.7
		5.6	0.6	15.9
		56.4	0.6	1.9
		1.4	0.7	1.8
		0.9	4.6	0.2
		0.9	0.6	0.6
		2	0.4	3.5
		0.3	0.5	0.7
		2.2	2	0.7
		1.9	1.5	0.3
		9.8	9.6	0.9
		0.9	1.6	0.1
		1.2	2.3	1.7
		1.4	0.2	4.7
		0.2	0.4	1.9
		5.3	8.6	0.3
		1.6	0.2	0.1
		21.2	0.9	0.2
		0.9	0.2	0.3
		0.7	0.8	0.4
		0.8	25.4	0.3
		0.4	7.7	0.4
		0.5	10.6	0.5
		0.1	3.8	0.4
		9.6	9.8	32.5
		0.2	8.3	1
		0.7	1.2	1.5
		3.1	1	0.3
		1	4.6	1
		8.6	0.3	0.1
		0.4	7.3	0.3
		18.2	1.5	0.2
		1.1	0.9	0.1
		4.3	2.2	0
		0.2	0.7	2.5
		0.6	2.3	0.1
		1	19.9	0.1
		0.3	0.4	0.8
		3.6	0.4	0.3
		0.5	0.3	0.1
		2.3	0.2	1
		0.3	16.7	0.4
		4.6	34.3	10.3
		4.2	0.8	0.9
		0.1	0.6	0.7
		41.8	0.1	6.2
		1.4	1	2.4
		0.8	9.9	0.4
		22.2	1.7	0.7
		0.5	1.3	0.4
		0.5	0.5	3.1
		73.6	0.1	0.3
		0.5	0.1	0.8
		0.4	33.2	4.1
		2	2	0.1
		35.6	0.8	2.5
		9.3	0.7	0.4
		1.2	0.2	46.6
		1.1	0.3	6.9
		1.1	0.2	9.2
		1.4	0.8	0.1
		1	0.2	0.2
		1.2	0.1	0.3
		0.1	0.1	0.1
		2	8.1	0.1
		2.8	0.4	2.3
		2	0.4	2.9
		2.4	3.4	3.4
		0.4	0.3	0.9
		8.1	0.2	0.6
		7.8	0.4	1.9
		3.7	0.3	1.6
		19.2	3.2	32.1
		1	12.9	0.1
		4.2	1	4.2
		0.8	0.4	1.7
		1	7.2	0.3
		1.5	0.2	0.4
		2.5	9.5	1.9
		0.1	4.2	0.9
		2.4	1.9	0.2
		3.8	3.6	0.3
		44.5	0.6	3.7
		1	0.3	4.3
		0.3	2.3	0.7
		0.2	0.2	0.9
		1.8	0.3	2.5
		0.1	0.3	7.6
		1.5	11.1	0.2
		11.5	0.3	0.4
		0.5	1.1	30.3
		4.2	1.1	9.4
		3.1	0.1	1.2
		1	45.2	0.2
		0.8	0.1	0.2
		2	0.2	0.5
		12.2	0.2	1.8
		0.4	0.1	0.3
		3.9	0.4	0.8
		12.8	6.6	1.7
		2.7	1.3	13.7
		3.3	1	0.2
		0.7	0.8	1.3
		0.1	2.4	36.3
		0.3	16.5	0.4
		1.9	0.6	0.3
		3.1	3.7	0.5
		13.4	2.6	0.2
		0.9	41.9	1.3
		0.1	1.5	0.3
		0.2	1.1	0.3
		2.2	1.9	7.9
		0.7	0.7	0.7
		0.9	1	2.1
		1	1.2	0.8
		0.8	0.4	0.3
		1.3	0.5	0.1
		17.6	0.3	2.9
		15	0.2	1.9
		0.3	0.3	0.1
		5.8	0.1	0.4
		1.8	0.7	0.7
		0.7	0.1	0.7
		0.2	0.1	0.4
		0.8	4	0.1
		14.9	0.1	3.8
		1.7	0.9	1.6
		0.8	1.9	4.5
		1.2	1.5	0.3
		34.8	0.9	0.3
		11.1	0.2	0.6
		3	0.4	2
		0.2	8.7	0.1
		0.2	1	1.3
		2.5	0.2	2.5
		149.7	1.1	0.2
		0.5	2.1	0.4
		0.7	26.8	0.5
		0.3	22.7	5.5
		22.6	4.5	3.5
		1.3	0.7	1.2
		2.1	1.1	0.8
		0.1	0.7	0.2
		0.6	0.4	0.1
		1.1	0.1	1.8
		6	1.9	1.5
		0.4	0.3	0.4
		1.3	0.6	3
		0.7	0.1	6
		97	0.1	2.9
		7.7	0.1	0.3
		7	0.1	0.5
		2.7	3	0.9
		1.3	0.2	0.8
		2.5	2.5	1.4
		18.1	0.1	0.6
		1	0.4	0.7
		1.1	3.2	0.9
		1	0.1	10
		10.6	1.1	0.1
		0.7	3.4	0.4
		0.5	15.3	0.6
		0.6	0.5	3.4
		1.3	0.1	1.3
		0.1	0.6	0.2
		2.6	14.3	1.1
		7.6	0.1	6.9
		0.7	0.8	0.1
		0.2	2.6	17.3
		1.7	0.5	1.8
		1	0.6	0.2
		2.2	2	2.9
		31.3	0.1	1.7
		0.1		3.9
		5.3		4
		13.2		0.5
		1		0.1
		0.4		0.5
		0.7		0.5
		3		0.4
		1.4		15.3
		0.7		7.5
		4.5		0.3
		2.6		8
		4.5		0.1
		1.9		0.8
		2.2		0.2
		7		0.1
		3.8		4.6
		0.1		12
		0.7		16.4
		0.8		1.2
		0.4		1.1
		1		10.3
		0.3		1.4
		2.3		2.6
		6.2		0.1
		0.6		0.1
		1.5		0
		0.1		2.4
		0.1		0.7
		47.3		0.1
		40.6		3.9
		4.4		0.9
		3		0.3
		0.2		1
		0.1		1.5
		2.8		0.9
		12.2		2.1
		15.8		0.1
		3		0.9
		2		1.1
		0.4		0.3
		0.4		0.4
		5.7		2.1
		0.3		0.9
		1.8		0.2
				0.8
				0.7
				25.4
				2.5
				0.4
				2.3
				0.4
				1.1
				1
				1.6
				3.3
				2
				0.8
				3.4
				0.2
				0.3
				4.5
				44.5
				1.9
				35.9
				0.2
				2
				18.2
				1.7
				0.3
				60
				2.5
				0.3
				1.2
				0.5
				0.2
				0.5
				0.2
				0.3
				0.9
				0.7
				0.1
				0.5
				0.2
				0.2
				0.6
				0.3
				23.1
				2.2
				0.3
				0.4
				1.3
				0.3
				0.1
				0.4
				0.6
				0.3
				0.2
				0.4
				1.6
				0.1
				0.5
				0.2
