# Supplementary material for: Tight bending of the Ndc80 complex provides intrinsic regulation of its binding to microtubules
Source: eLife. 2019 May 2;8:e44489. doi: 10.7554/eLife.44489 (PMC6516834; doi:10.7554/eLife.44489)
Supplement: Figure 1—figure supplement 3—source data 1. [file elife-44489-fig1-figsupp3-data1.xlsx]

## Sheet: Sheet1
Figure 1-figure supplement 3
	3 days, 3 slides	3 days, 3 slides
Residence times	Ndc80-MIND	Ndc80-MIND+10X V159D
	121.7	2
	45.9	12
	0.8	1.2
	1.3	2.4
	0.7	6.2
	0.7	0.9
	0.6	6.7
	11.7	0.2
	6.5	17.5
	1.3	0.4
	0.6	1
	82.9	15.9
	23.6	9.3
	41.9	1
	0.3	1.3
	1.4	7.1
	0.4	1.8
	0.7	1.1
	11.6	1.5
	6.1	3.2
	66.8	2.1
	0.2	0.9
	1.3	0.7
	0.1	0.7
	3.4	3
	0.2	0.6
	0.3	0.3
	2.8	1.1
	3.9	4.8
	1	4.3
	11.4	0.1
	71.8	6.2
	22.9	4
	0.1	1.3
	0.3	0.5
	13.1	58.6
	0.6	1.8
	13.7	0.3
	0.1	9.9
	5.4	1.5
	0.9	8.8
	48.4	0.1
	1.6	57
	24.8	12.1
	2.9	4.3
	55.3	20.2
	0.5	4.7
	23.2	2.5
	0.5	70.5
	69.2	0.3
	8.6	2.7
	0.7	1.6
	29.4	0.3
	4.6	3.3
	3.5	0.1
	0.5	2.6
	1.5	8.5
	0.3	3.7
	0.9	1.1
	0.6	2.3
	9.9	0.3
	3.9	1.6
	1.2	15
	0.2	3.2
	0.5	0.4
	0.5	8.7
	0.6	0.8
	0.3	3.7
	8.4	0.4
	0.8	0.3
	1.6	1
	0.7	4.3
	0.3	1.1
	45.3	0.7
	0.1	31.1
	1.6	0.7
	71.5	0.5
	23.1	8.4
	1.7	3.7
	1.1	1.1
	2	3
	0.1	0.2
	2.6	0.1
	0.4	3.6
	1	1.2
	1	0.8
	0.2	2
	1.5	0.5
	0.9	2.2
	1.4	3.1
	10.6	0.4
	0.4	2.2
	19	9
	67	0.1
	18.2	3
	0.8	22.3
	1.1	0.5
	0.6	0.8
	0.2	0.7
	49.5	3.2
	1.1	3.4
	1.1	0.7
	0.4	0.7
	3.1	26.5
	1.1	0.2
	0.7	0.1
	0.6	0.7
	0.2	0.5
	2.9	0.4
	2.4	0.3
	3.7	0.2
	28.3	3.7
	0.6	7.6
	0.4	6.1
	2.7	1
	1.7	0.2
	2.6	0.7
	1	1.9
	7.6	0.3
	50.7	6.4
	4.5	0.6
	0.2	0.1
	7.3	0.2
	11.7	3.8
	1.4	3.2
	1.5	3.3
	1.7	2.3
	7	1.6
	0.8	7.9
	2	1.2
	0.4	3.5
	52.1	4.3
	1	0.7
	0.6	0.1
	0.6	0.6
	1.9	1
	27.8	0.8
	1.3	0.9
	2.2	5.1
	0.9	0.3
	18.3	0.3
	0.5	0.1
	64.9	0.4
	2.6	0.4
	0.2	16.2
	5.1	2.2
	0.8	21.7
	0.9	12
	7.3	0.4
	0.8	3.3
	1.3	9.7
	2.4	0.8
	31.1	2.1
	5.9	0.4
	1.2	25.6
	18.1	2.7
	47.9	11.7
	0.8	9.6
	0.7	0.6
	34.9	2.5
	0.4	2.2
	19.8	4.7
	0.2	1.5
	9.7	3
	3.4	7.1
	3.4	4.2
	5.7	0.2
	0.5	5
	31.4	3.7
	5.9	0.4
	16.7	0.2
	11.6	0.2
	0.2	0.7
	6.6	6.3
	0.3	0.1
	0.2	0.1
	0.7	0.4
	0.3	0.3
	0.1	0.8
	16.1	0.2
	0.8	0.5
	4.3	0.1
	0.6	1.8
	0.8	0.4
	0.4	0.4
	0.1	0.6
	19.7	2.2
	1	0.1
	0.3	0.3
	43.3	0.2
	2.2	4.5
	71.3	11.1
	18.2	3.4
	89.2	0.1
	3.5	0.3
	12.5	0.2
	5.7	0.2
	7.7	3.7
	0.5	1.7
	0.1	1.3
	1	2.1
	0.3	1.6
	1.4	4.6
	27.2	1.4
	0.4	21.9
	4.8	1.3
	4.5	1.5
	1.4	2.1
	17.3	3.7
	102.5	11.8
	0.1	6.7
	0.7	0.7
	30.7	5
	5.3	0.5
	0.4	2.4
	0.1	0.1
	0.2	2.7
	46.8	0.6
	29.7	0.9
	23.8	0.1
	23.8	1.5
	49.3	0.2
	61.9	12.6
	0.2	6
	1.1	28.3
	1.4	0.9
	1.8	0.9
	45.4	1.7
	1.6	5
	0.1	0.2
	42.7	0.1
	3.1	2.3
	0.5	0.2
	4.1	0.1
	42.9	5.5
	16.4	1.6
	1.1	0.4
	0.7	0.1
	113.8	2.7
	1	1.3
	24.3	0.4
	12.8	0.9
	0.4	2.5
	0.9	1
	38.2	0.7
	27.9	0.3
	0.6	0.1
	42.1	0.2
	8.5	0.1
	3.1	1.2
	1.3	0.5
	1.4	0.3
	11	0.5
	1.4	0.1
	0.2	9.3
	10.7	2
	0.3	0.2
	0.6	0.9
	1.6	0.6
	0.5	0.9
	15	13
	1.3	0.2
	0.5	0.4
	11.6	0.3
	1.5	0.4
	0.1	0.5
	2.8	0.3
		0.3
		7.9
		0.5
		3
		0.2
		0.6
		0.1
		0.3
		1
		4
		67.2
