# Supplementary material for: Tight bending of the Ndc80 complex provides intrinsic regulation of its binding to microtubules
Source: eLife. 2019 May 2;8:e44489. doi: 10.7554/eLife.44489 (PMC6516834; doi:10.7554/eLife.44489)
Supplement: Figure 1—source data 1. [file elife-44489-fig1-data1.xlsx]

## Sheet: Sheet1
Figure 1 B, C
Residence times		Ndc80	Broccoli	Broccoli+60X Spc24/Spc25	Broccoli+60X Spc24/Spc25 7K	Ndc80-MIND	Ndc80-MIND+10X Spc24/Spc25
		0.2	9.6	1.3	1.7	4.8	6.6
		0.2	1.5	1.8	0.5	0.5	8.4
		4	31.7	0.6	0.5	3.2	1
		4.9	5.4	0.6	5.4	39.5	2.4
		0.4	1.4	2.1	3.7	4.6	0.2
		2.8	0.9	0.2	1.2	12.1	2
		0.9	1.1	0.1	5.4	0.6	3
		0.9	0.1	0.7	0.3	1	0.7
		2.5	1.6	1.2	1.6	12.2	0.1
		0.2	3.9	0.3	1.3	0.7	3
		0.3	3.9	0.6	14.8	10.8	1.6
		0.4	0.9	0.2	12.1	6	1.1
		2.1	6.2	0.2	1.9	0.8	0.1
		1.6	25.3	0.8	0.7	0.2	0.2
		0.3	14.9	0.1	3.6	1	20.7
		1.1	0.3	0.1	7.1	0.8	40.7
		0.5	20.5	3.5	0.2	7.2	0.2
		0.8	17.1	0.6	3.1	3.2	0.1
		0.4	4	0.2	11	0.5	2.3
		1.5	0.4	0.1	0.4	12.3	2.8
		6.3	18.6	0.5	2.1	0.5	0.2
		4.6	29.5	1.4	8.1	43.8	151.1
		5.1	0.1	0.5	2.5	2.8	5.2
		0.8	1.1	0.4	8.9	2.1	3.5
		0.2	0.7	0.1	2.3	1.7	0.2
		2.2	0.1	1	0.7	4.2	4.2
		1.6	1.9	0.4	0.2	0.5	0.3
		1.1	23.6	1.7	0.5	0.3	0.1
		3.6	1.2	0.5	0.7	29.9	0.6
		6.2	3.8	1.7	8.6	44.4	2.9
		0.1	1.9	1.4	7.2	5.6	0.5
		0.4	0.4	0.5	2.5	2.7	1.6
		1.6	0.5	2.9	1.3	0.8	0.4
		0.2	5.6	0.8	2.1	1.6	0.1
		2.5	5.8	0.2	0.4	0.1	5
		6	0.6	2.3	9.3	0.6	7.3
		0.1	0.1	5.4	22	0.6	2.5
		1.8	0.4	4.1	3.5	0.9	0.4
		13.7	1.7	1.8	0.2	0.1	1.2
		0.2	17.4	0.4	8.5	0.1	22.5
		1.6	1.4	0.4	4.5	4.2	0.5
		1.7	0.8	0.1	1.5	0.9	4.5
		1.2	0.9	0.2	2.1	1.2	0.4
		0.5	0.2	0.1	0.1	4	19.1
		2.5	3.2	2.6	1.8	5.1	18.4
		0.8	0.2	0.8	1.7	66.3	0.8
		0.1	0.1	0.4	0.8	17.7	31.4
		0.4	6.7	0.5	1.2	3.4	0.2
		1	0.3	4.5	0.4	8.1	4.5
		3.7	0.2	0.6	0.6	3	1.2
		3.2	0.1	5.5	0.1	0.7	6.4
		2.1	1.1	0.3	2.5	1.5	8.2
		11.8	1.2	0.5	2.3	1.9	2.4
		4.2	47.6	0.1	9.5	0.2	5.2
		0.3	3	0.4	0.3	2.7	0.8
		11.6	0.4	9.4	22.5	2.3	2.8
		1.9	21.1	1.8	51.3	0.7	0.1
		2.9	0.1	3.3	20.3	3.4	0.1
		0.2	0.2	0.1	61.4	16	0.1
		0.3	0.9	0.2	3.2	0.7	1
		0.1	0.3	1.6	1.3	7.6	3.8
		2	0.3	0.3	0.1	13	4
		4.8	2	0.3	2.5	0.3	2.1
		6.5	1.5	8.7	0.1	5	0.9
		1.5	0.2	1	0.8	5.5	0.3
		3	1.9	3.1	30.9	30.7	6.1
		4.6	0.6	0.2	3.8	4.5	2
		2.3	1	0.7	2.8	2.7	0.2
		0.1	0.2	0.1	13.4	0.4	0.9
		4.1	6.5	5.8	0.1	0.5	1.2
		1.2	6.6	0.9	0.3	0.1	0.1
		2.4	1.4	0.3	5.8	0.3	0.3
		0.3	14.6	1.5	0.4	1.6	0.9
		0.5	0.2	0.8	1	44.7	4.1
		3	9.2	1.2	5.8	2.4	6.7
		0.3	0.6	0.7	2.3	0.3	0.2
		0.4	12.1	1.9	0.4	71.8	1.2
		7.5	0.2	0.8	2.5	4.3	0.4
		0.1	0.8	0.1	13.2	1.7	32.8
		2.3	2.7	0.8	8.4	1.3	1
		0.3	1.2	1.5	37.9	6.5	1.5
		0.7	0.4	0.8	0.1	5.4	0.2
		0.5	2.1	0.8	0.1	6.6	0.8
		10.6	0.5	0.8	3.7	71.9	0.4
		1.3	76.3	1.3	2.8	0.1	0.1
		1.4	0.8	0.5	1.1	0.4	1.5
		4.5	10.6	0.8	3.4	22.6	3
		1.5	0.3	1.9	0.7	10.8	0.7
		2.5	3.7	0.6	0	0.5	2.6
		1.2	0.9	0.5	0.5	0.2	1.7
		2.6	0.6	1.3	0.1	0.2	1.4
		2.7	0.3	2.1	6.1	3.3	2.7
		1.9	1.7	1	3.6	0.3	0.2
		3.4	22.5	0.2	1.9	4.1	1.4
		2	0.1	0.7	0.5	2	3.7
		2.4	6.2	0.8	0.2	0.4	5
		4.5	12.9	0.2	0.1	4.3	1.8
		0.3	0.4	0.7	0.3	0.1	0.1
		1	11.2	0.6	1.2	5	3.2
		0.6	0.2	1	0.9	12.3	2.9
		2.8	4.8	1.1	0.1	6.9	0.9
		0.6	2.7	0.5	31.4	3	1.5
		0.6	0.1	0.6	0.7	1	0.5
		0.7	0.5	3.1	1.6	0.2	0.1
		0.4	0.1	28.3	0.7	9	0.7
		0.2	0.5	0.2	0.1	3.4	0.1
		3.6	29.5	0.6	1.1	1.5	0.4
		7.3	8.9	12.1	0.7	3.2	12.6
		1.5	1.9	3	10.7	3.7	0.1
		3.2	1.4	0.1	1.5	1.4	1.4
		8.3	1.7	0.6	0.2	1.1	1.4
		47.6	6.4	0.5	1	14.8	0.2
		1.3	2.1	0.6	1	11.2	1.7
		1.5	0.6	0.8	2.2	1.5	2.1
		0.7	1.5	1.1	0.8	6.6	1
		0.7	0.9	1.8	10.8	2.9	0.9
		5.8	5.9	0.4	0.2	2.5	1
		1.3	1.8	0.5	0.4	0.9	37.2
		0.9	0.1	0.5	0.2	0.2	0.1
		0.6	16.7	1.3	6.3	1.1	0.8
		0.2	27.7	0.8	1.6	0.9	1.3
		3.2	1.1	0.2	2.1	1.7	0.1
		2	0.1	2.8	5.4	1.1	1
		0.2	6.6	1.6	12.9	3.7	0.8
		0.2	5.9	0.7	0.8	0.8	0.1
		0.3	6.7	1.9	44.1	1.1	1.6
		0.1	43.4	0.2	1.6	51.9	2.8
		16.8	0.3	0.1	0.1	10.9	3.4
		1.7	0.8	0.2	0.4	0.1	1.5
		2.6	4.5	3	5.4	2.8	0.1
		1.5	0.4	0.7	1.7	19.3	0.8
		3.2	7	0.5	3.9	5.7	44.1
		0.5	7.8	1.8	0.5	17.9	7.4
		3	0.2	0.2	2.7	4.7	0.1
		0.8	0.1	1	1.3	1.2	1
		2.6	1.7	0.1	22.9	79.4	0.7
		0.1	3.7	0.1	1	2.7	0.9
		1.6	2.9	2.9	10.7	0.5	1
		9.9	0.3	2.7	1	46.7	1.1
		2	1.5	3.2	1.1	0.7	0.2
		0.3	4.3	0.5	8.2	23.2	31.3
		0.3	0.3	0.4	1.9	4.4	1.7
		3.8	3.5	2.8	3.2	13.3	3.8
		4.5	2.8	5.3	7.6	46.1	1.6
		1	0.8	2	84.1	0.1	2.7
		6.2	1.4	0.3	0.8	108.3	3.1
		0.4	0.2	0.3	0.3	0.6	0.1
		1.9	1	0.6	0.8	0.1	1.1
		0.2	0.8	4.8	7.4	0.2	13.9
		0.2	0.2	0.4	2.9	0.6	12.4
		0.1	2.4	0.4	40.2	0.9	0.2
		1	0.2	1.4	81.4	0.9	1
		0.7	0.1	0.7	4.2	0.4	0.2
		0.2	0.1	0.4	7.8	0.8	70.2
		1.8	0.2	0.8	1.5	0.7	1
		0.9	2.9	0.1	1.1	12.8	0.1
		4.4	6.1	1.8	0.3	4.8	1.8
		8.2	2.2	1.4	0.1	3.4	0.4
		0.4	1.5	7.2	0.6	0.6	103.6
		2.9	0.5	5.3	1.4	1.7	0.1
		0.5	0.1	0.6	0.3	0.1	0.2
		10.8	10.1	6	11.9	1.3	0.2
		0.2	0.4	1.1	0.5	3.9	0.6
		0.5	0.8	53.8	1.7	1.8	1.3
		1.1	0.6	5.5	1	1.3	0.3
		10	26.7	1.1	2.5	31	2.2
		2.6	12.6	0.1	0.5	6	0.5
		0.2	2	23.1	2.9	10.2	0.8
		1.9	1.1	3.9	0.2	0.3	0.5
		6.5	0.2	0.3	0.3	0.1	0.3
		8.4	0.3	0.9	2.6	25.5	3.2
		34	7.6	0.5	3.1	19.9	0.2
		0.8	0.2	0.7	4.4	0.6	0.7
		1.1	4.8	1.7	1.6	24.2	0.2
		11.5	2.4	5.7	0.4	1	0.1
		0.1	0.4	18.8	16.7	5.4	1.6
		0.2	4.5	0.1	3.1	5.9	13
		2.2	0.9	0.1	2.1	1.4	55.9
		13.6	5.8	0.5	0.2	49.5	0.1
		0.1	0.4	5	18	23.1	15.1
		26.2	5.5	107.6	0.1	10.7	0.7
		0.3	7.5	4.7	4.6	12.5	0.5
		2.9	6.6	0.8	0.8	4.3	25
		3	2.8	0.4	0.2	1.6	1.9
		0.7	17	8.5	1.4	2.7	0.8
		1.2	15.8	32	1.6	63.4	2
		0.6	0.4	0.1	0.3	0.4	7.2
		2.1	0.4	3.5	13.9	0.3	1.8
		1	7	1.9	0.8	15.2	2.3
		0.3	1.2	0.2	3	0.4	0.1
		0.2	0.3	0.1	23.6	32	2.1
		0.2	29.8	0.8	0.7	0.3	2.7
		0.1	9.8	1.5	2.1	19.4	1
		0.7	4.1	1.2	6.5	35.1	1.3
		1.9	0.5	2.2	11.5	3.6	20.4
		3.6	0.9	1.7	24.4	2	11.1
		4.4	0.1	2.3	16.2	6.9	0.5
		1.3	0.2	0.5	1	11	0.2
		2.8	0.4	0.3	0.6	2.4	2.9
		0.7	0.3	1.7	2.1	29.2	0.5
		0.7	0.7	1.5	0.1	1	1.2
		2.4	1.3	9.9	0.2	1.2	3.2
		6.7	0.1	5.3	12.9	11.5	0.4
		5.3	0.2	2.9	2.4	7.3	0.9
		0.2	0.1	4.1	1.1	1.6	0.1
		12.1	0.2	1.9	1.1	3.6	6.8
		1.2	1	0.2	22.2	8.4	3.7
		0.2	25.1	0.1	46.2	7.3	1.2
		1.3	0.3	6.4	3.9	1.3	3.7
		0.1	7.8	1.7	0.4	19.7	1.5
		3	0.9	1.5	6.6	8.1	0.8
		0.1	0.2	2.4	0.3	4.9	1.3
		44.4	1.8	0.5	9.7	0.8	2
		0.9	1.5	1.6	0.3	18	0.6
		4.4	1.5	0.1	6.7	3	0.1
		1	0.4	0.4	2.5	8	0.1
		3.2	80.4	2.8	0.5	13.6	0.2
		0.2	0.4	11.2	0.9	45.9	2.3
		0.1	1.7	1	45.1	6.9	0.7
		1.7	1.6	0.1	8.5	8.3	0.2
		0.1	0.9	0.4	1.4	2.4	0.3
		0.8	3.8	0.3	7.2	0.9	0.9
		0.2	1.4	0.2	4.1	4.2	3.7
		6.3	5.3	0.8	3.6	16.4	8.3
		1	0.5	3.7	2	14.8	0.3
		4.3	2.1	0.2	0.2	0.2	9.2
		10.8	1.8	0.3	0.1	0.2	1.6
		0.2	0.1	2.3	17	0.3	1.2
		3.9	0.2	0.3	3.3	1.1	0.2
		0.6	0.8	2	2.4	8.9	1.1
		0.1	0.5	13.6	0.1	2.7	0.1
		0.7	7	10.3	0.6	0.6	0.3
		0.2	1.3	0.4	7.7	14.1	0.4
		0.1	1.5	0.6	0.1	0.3	0.1
		0.4	2.2	0.2	0.5	1.1	0.4
		10.7	0.3	4	7.3	49.5	1.8
		20.3	0.2	3.6	1.6	0.2	0.3
		0.2	1.3	0.4	1.2	2	1.7
		1.1	0.1	0.4	1.8	7.3	1
		0.1	0.2	0.5	0.4	25	13.2
		0.2	1.4	3.2	1.1	15.4	2.3
		0.9	0.9	9	1	0.4	44.3
		0.4	1	0.2	0.2	13.1	0.5
		1	0.2	0.8	21.7	12.3	4.5
		5	1.2	3	0.7	51.5	0.3
		0.7	1.2	1	1.7	1.1	6.1
		0.4	0.8	0.4	3.9	16.5	0.1
		0.1	0.2	5.5	4	0.9	55.3
		12.8	0.9	2.2	0.3	71.3	0.7
		2.1	4.8	2.8	1	2.5	0.2
		0.8	2.7	0.3	0.1	69	0.2
		2.3	2.4	6.2	23	6.1	0.3
		12.1	4	28.2	7.9	1.1	0.1
		0.8	5.1	21.6	16.7	10.6	0.1
		4.8	3.5	4.7	0.5	7.6	0.1
		0.3	5.7	2.4	3.1	5	0.1
		9.2	1.1	21.4	29	1.2	0.1
		1.8	0.6	0.8	11.9	1.7	0.2
		4	0.6	3.6	9.3	3	1.6
		0.6	0.8	1.5	14.5	6.9	2.3
		0.4	0.8	0.1	34.3	83.7	0.2
		0.1	6.9	3.9	0.4	0.2	0.8
		0.2	1.5	22.8	3	12.4	0.6
		2	1.6	7.8	1.5	0.4	0.8
		0.3	3.3	17.3	23.2	7	0.4
		1.7	1.2	8	0.9	31.2	0.2
		4.3	22.2	0.6	67.4	1	1.2
		5	3.8	0.4	1.7	0.5	0.2
		3.8	0.6	0.2	12.2	4.3	0.9
		0.2	0.1	0.3	2.1	0.5	0.8
		2.7	0.3	34.2	0.4	0.8	0.2
		0.4	0.2	9.2	1.5	1	4.4
		1.7	1.1	0.1	10.6	1.2	41.5
		9.1	2.1	8.2	8	65.6	1.6
		0.7	6.6	0.1	27.7	39	0.4
		2.7	0.4	3.1	2.3	2.6	1.1
		1	4.3	0.3	0.1	25.1	13.6
		10.7	12.2	0.4	0.2	38.6	1.1
		1	2.9	2.2	5.3	27.1	1.6
		0.9	4.8	0.1	1.3		2.9
		1.1	36	0.1	8.9		0.2
		0.3	1.7	40.4	7.4		1.2
		0.7	1.5	8.9	66.5		0.8
		0.6	2.7	12	5.3		0.3
		0.8	7.9	0.8	14.2		1.3
		3	1.9	0.4	0.8		2.2
		20.4	0.7	0.3	0.4		3.5
		0.8	7.4	3.4	0.2		1.1
		10.7	40	15.2	26.9		0.1
		0.6	18.2	1.6	11.6		0.7
		5.3	4.7	0.8	0.5		0.1
		25.7	0.6	1.4	0.1		0.7
		0.2	0.5	0.1	0.2		0.1
		0.4	95.7	0.1	29.7		0.1
		0.5	39.2	0.1	0.5		0.4
		0.7	6	0.7	20		0.8
		1.1	2	1.2	0.2		0.5
		1.1	0.8	0.3	1.4		1.8
		2.8	0.4	2.3	31.4		0.1
		1	3.2	0.8	19.5		3.3
		0.1	33.7	0.6	0.6		94.8
		5.1	0.2	1.4	9.1		5.5
		0.4	8.9	0.9	2.3		0.6
		0.2	18.6	0.2	33.1		3.9
		0.2	18.9	0.4	0.4		0.8
		0.3	4.1	0.5	2.2		0.1
		1.3	1.4	0.3	0.1		0.4
		2.6	18.6	16.6	0.3		0.1
		16	0.8	0.2	0.5		0.1
		0.7	0.1	1.6	40.5		45.1
		3.6	5.1	0.3	0.3		0.4
		0.1	1.7	0.4	11.7		0.4
		0.6	28.3	0.6	0.6		1.8
		2.6	104.7	1	0.2		0.4
		0.1	0.5	0.6	21.1		0.1
		1.4		1.1	0.3		3.3
		1.7		25.8	2.3		0.1
		0.5		2.5	0.2		0.1
		0.4		0.2	135.1		0.1
		0.2		0.2	0.7		0.7
		5.5		0.2	3.5		0.3
		0.4		5.4	7.4		9.7
		2.6		3.2	0.3		0.8
		0.1		1.4	1.1		57.4
		3.7		1	0.4		4.3
		0.9		0.4	0.5		1.6
		0.2		43.5	0.2		0.3
		0.3		0.6	19.4		0.2
		0.1		0.1	19		1.7
		3		0.1	0.3		0.4
		0.9		0.6	21.7		1.8
		0.3		3.3	2.8		21.2
		0.5		3.6	0.8		0.2
		1.2		0.9	0.9		2.1
		13.6		5.3	2.2		0.5
		0.5		5.8	2		0.3
		2		2.1	4.9		1.6
		0.2		0.7	1.2		1.1
		1		0.6	0.3		0.1
		0.1		10.3	9.1		7.6
		0.1		8.5	0.5		75.5
		1.6		6.5	1		1.2
		4.9		5.3	1.4		0.1
		8.9		1.2	3.7		0.8
		0.7		5.2	2.1		6.6
		10.3		2.6	13.3		5.3
		1.1		0.4	5.3		0.7
		5.4		0.6	31.9		5.7
		0.1		19.4	16.1		0.5
		0.1		3.9	1.2		0.1
		0.5		0.7	0.6		0.1
		0.6		0.4	27.6		0.2
		0.7		0.3	2.2		1.6
		4.2		0.1	2.9		1.5
		0.4		0.4	25.8		1.5
		0.2		2.6	29.3		0.3
		0.2		0.2	0.2		2.9
		1.2		0.5	0.5		1.7
		32		5	0.1		2.6
		2.3		6.5	1.1		0.5
		1.9		3	0.6		0.5
		3.8		0.2	2.3		2.6
		1		0.4	0.7		11.9
		3.6		0.1	5.3		1.5
		5.3		6	3		13.3
		7.6		1.1	0.1		0.3
		0.1		3.1	13.3		4.1
		0.1		0.4	20.7		0.8
		0.1		2.6	3.1		0.4
		0.8		1	3.9		1.1
		0.2		1	10.4		1.2
		0.1		0.1	0.8		1.1
		0.8		35.9	1		6
		4.8		0.1	2.1		0.5
		0.6		1.7	10.9		0.2
		13.4		2.3	56.4		0.3
		10		1.5	7.9		0.4
		1.4		0.6	25.8		4.4
		0.3		5.7	2		0.6
		0.7		5.2	0.5		5.5
		2.1		0.1	1.6		0.8
		0.1		1.7	0.1		0.5
		0.8		4	0.3		1.7
		0.2		1.1	0.3		0.9
		3.4		1.2	63.4		0.4
		1.4		0.2	12.9		0.9
		50.7		3.7	3.8		1
		1.9		4.2	14.4		1.7
		1.2		0.6	0.2		1.5
		1.4		0.2	0.7		2.6
		2.4		1.3	36.3		0.6
		1.3		5.3	2		0.1
		0.6		69	7.6		0.3
		8.8		0.9	3		0.4
		2.3		0.6	0.9		3.3
		9.3		1.7	0.8		1.2
		0.8		2.4	1		1.5
		0.8		3.1	0.4		0.5
		0.7			0.9		0.3
		0.4			0.3		0.7
		0.8			2.6		0.9
		22.7			2.9		2.4
		0.4			17.9		0.4
		1.2			16.2		0.5
		3.9			0.8		0.5
		0.1			2.9		1.5
		0.6			0.7		0.1
		1.6			3.9		0.9
		2.3			1.5		6.2
		0.2			1		19.3
		1.7			8.1		0.1
		0.1			74.3		28.5
		2.7			0.2		6
		1.1			0.2		3.1
		0.1			42.2		0.4
		3.2			11.8		2.1
		1.4			0.4		0.7
		20.5			0.9		3.9
		1.2			1.6		7.7
		3.2			0.3		0.3
		0.1			14		0.5
		0.1			23.9		1.7
		0.3			3.2		0.5
		0.5			16.3		0.3
		0.4			6.5		169
		9.5			12.6		0.1
		3.4			0.6		2.1
		2.5			0.8		1.7
		11.1			42.6		0.1
		0.6			33.8		3.1
		3.2			37.7		0.9
		2			0.1		0.9
		1.5			0.1		0.1
		8.5			0.9		2
		1.3			0.6		2
		0.1			0.5		1.3
		2.3			85.7		1
		1.6			1.7		0.5
		0.1			4.2		1.2
		1.1			12.4		10.6
		0.5			12.3		0.2
		11			1.8		12.9
		1.8			0.2		0.2
		0.1			1.5		0.4
		2.4			0.3		1
		0.2			0.5		0.6
		14			0.6		0.6
		0.1			2.5		0.3
		2.8			2.2		5.2
		7.9			2.3		0.4
		5.9			0.5		12.9
		1.1			0.9		0.5
		1.9			16.7		0.8
		0.9			11.9		3.1
		0.6			0.8		0.2
		3.2			74.4		1.5
		2.4			0.1		0.1
		1.7			10.2		0.1
		0.5			1.6		2.4
		2			0.8		0.7
		4.4			0.6		1.3
		6.3			10.9		1.9
		0.7			10.1		2
		6			4.9		0.4
		2			1.5		1.2
		0.5			0.3		18.9
		0.3			0.4		2.1
		2.7			2.1		0.5
		1.5			28.5		0.5
		0.9			1.5		4.2
		0.2			0.1		2.5
		3.7			1.5		0.2
		0.4			41.4		0.2
		0.4			7.4		16.1
		0.9			0.5		0.4
		1.4			1.6		0.9
		0.7			4.4		1.4
		46.1			0.4		0.2
		0.1			2.7		0.1
		1.1			1.3		0.7
		1.4			0.8		0.1
		3.6			9.9		8.6
		6.3			1.2		0.2
		1.5			2.8		0.6
		0.1			8		2.6
		4.5			21.3		0.8
		0.1			3.7		0.5
		4.9			0.5		0.4
		2.7			1.6		0.1
		4.2			25.1		2.5
		6			0.2		0.4
		0.2			0.1		7.7
		19.6			0.2		0.6
		5.1			104.7		0.2
		0.2			0.1		0.1
		3			3.6		0.1
		0.2			0.5		4.3
		0.9			0.7		0.5
		0.1			1.1		0.4
		0.2			0.1		0.5
		0.2			0.5		9.9
		0.3			1.5		1
		0.5			2.7		1.8
		5.4			2.8		0.2
		0.3			3.2		7.4
		0.2			1.2		2.4
		0.3			0.7		3.1
		0.4			0.1		0.3
		0.3			0.2		0.3
		0.1			1.9		0.6
		11.9			0.9		0.7
		12.9			0.7		2.1
		0.2			1.4		0.1
		1			1.9		0.2
		0.1			8.7		0.2
		2.1			1		0.2
		0.2			2.7		0.3
		0.1			0.1		0.2
		0.1			1		1.4
		0.1			1.9		0.4
		2			3		1
		0.5			0.5		1.7
		0.1			0.1		1.2
		0.3			8.9		3.4
		20			2.9		6.4
		1			0.3		0.5
		2.8			0.7		21.1
		0.3			1.4		0.9
		0.5			4.6		1.7
		0.5			12.9		1.3
		0.8			1		0.2
		8.1			9.8		0.1
		0.1			0.1		0.4
		0.3			0.5		0.2
		0.8			0.4		0.1
		0.7			10		0.4
		0.6			0.8		0.1
					0.1		10.7
					0.5		0.1
					1.4		0.5
					0.7		1.5
					0.4		0.6
					0.3		2.4
					0.5		0.1
					0.2		5
					5.7		0.2
					22.7		0.1
					1.3		2
					0.1		0.1
					6.1		1.6
					0.2		21.2
					0.3		3.2
					0.1		0.9
					0.1		0.5
					30.4		1.5
					1.8		0.5
					0.8		1.4
					14.1		0.6
					25.3		1.2
					0.7		5.2
					17.3		0.6
					1.6		0.5
					7.6		0.2
					0.3		59.1
					0.5		2.3
					0.3		0.1
					0.1		0.3
					0.5		0.5
					30.9		0.1
					0.1		0.6
					0.3		0.3
					2.7		0.2
					6.3		0.1
					0.7		0.9
					17.3		1.1
					2.2		20.6
					1.8		0.4
					0.1		7
					1.4		0.7
					7.9		3.7
					2.8		6.4
					0.7		0.4
					0.3		3.6
					0.6		0.2
					0.7		1.1
					1.5		0.4
							1.8
							0.5
							2.2
							0.1
							2
							4
							2.3
							1.6
							0.2
							0.1
							2.5
							0.6
							0.1
							0.1
							0.1
							0.6
							1.4
							0.5
							1.4
							0.9
							0.2
							0.1
							1.2
							1.2
							1.2
							0.7
							24.4
							3.2
							0.8
							5.4
							0.2
							4
							1.4
							0.4
							0.4
							0.3
							1.5
							0.6
							0.8
							0.1
							0.2
							0.5
							0.4
							0.1
							3.6
							1.8
							3.8
							14
							2
							1.3
							5.9
							7.9
							0.2
							0.9
							48.7
							0.1
							0.8
							14.9
							47.8
							0.9
							8
							4
							0.8
							1.1
							6.2
							0.2
							0.2
							0.6
							0.2
							0.2
							0.1
							0.4
							3.2
							5.2
							0.3
							0.1
							30.5
							1.7
							0.4
							1.3
							0.5
							4
							0.1
							0.3
							1.8
							0.3
							9.4
							0.1
