# Supplementary material for: Tight bending of the Ndc80 complex provides intrinsic regulation of its binding to microtubules
Source: eLife. 2019 May 2;8:e44489. doi: 10.7554/eLife.44489 (PMC6516834; doi:10.7554/eLife.44489)
Supplement: Figure 2—source data 1. [file elife-44489-fig2-data1.xlsx]

## Sheet: Sheet1
Figure 2-source data 1
Residence times		Ndc80-GFP	Cy5-Ndc80-Cy3
		0.2	0.9
		0.2	5.4
		4	1.9
		4.9	12.1
		0.4	1.3
		2.8	0.9
		0.9	1
		0.9	24.5
		2.5	3
		0.2	1
		0.3	0.1
		0.4	4.4
		2.1	0.7
		1.6	0.9
		0.3	0.5
		1.1	0.3
		0.5	0.1
		0.8	1.3
		0.4	2
		1.5	0.8
		6.3	2.7
		4.6	1.1
		5.1	3.7
		0.8	3.4
		0.2	2.4
		2.2	2.1
		1.6	1.8
		1.1	0.8
		3.6	1.9
		6.2	1
		0.1	1.3
		0.4	0.3
		1.6	4.5
		0.2	0.6
		2.5	2.4
		6	0.1
		0.1	0.8
		1.8	6.9
		13.7	3
		0.2	4.2
		1.6	0.2
		1.7	1.8
		1.2	0.4
		0.5	1.7
		2.5	1.2
		0.8	0.4
		0.1	0.1
		0.4	3.3
		1	3.4
		3.7	0.5
		3.2	1
		2.1	1.2
		11.8	2.1
		4.2	0.1
		0.3	0.5
		11.6	1.1
		1.9	7.4
		2.9	0.1
		0.2	0.3
		0.3	1.2
		0.1	1.1
		2	1.8
		4.8	0.7
		6.5	3.2
		1.5	0.5
		3	0.4
		4.6	0.8
		2.3	0.8
		0.1	0.3
		4.1	1.3
		1.2	1.3
		2.4	0.3
		0.3	0.4
		0.5	0.7
		3	0.5
		0.3	26.4
		0.4	2
		7.5	3.3
		0.1	0.7
		2.3	4.3
		0.3	0.2
		0.7	0.3
		0.5	1.9
		10.6	3.4
		1.3	9.1
		1.4	1.8
		4.5	0.3
		1.5	1
		2.5	0.1
		1.2	2.8
		2.6	0.9
		2.7	2.8
		1.9	0.9
		3.4	3.1
		2	2.2
		2.4	14.1
		4.5	1
		0.3	0.6
		1	2.1
		0.6	3.6
		2.8	0.1
		0.6	0.2
		0.6	0.6
		0.7	0.6
		0.4	2
		0.2	0.3
		3.6	0.9
		7.3	2.8
		1.5	3.8
		3.2	1.5
		8.3	1.6
		47.6	0.5
		1.3	0.2
		1.5	2
		0.7	0.1
		0.7	1
		5.8	7.1
		1.3	12.2
		0.9	0.2
		0.6	5
		0.2	0.9
		3.2	0.2
		2	2.2
		0.2	4.1
		0.2	2.1
		0.3	0.2
		0.1	35.3
		16.8	0.2
		1.7	1.9
		2.6	1.1
		1.5	0.5
		3.2	0.6
		0.5	0.7
		3	0.3
		0.8	25.3
		2.6	1.2
		0.1	4.6
		1.6	0.5
		9.9	0.4
		2	2.8
		0.3	7.7
		0.3	0.7
		3.8	0.1
		4.5	0.5
		1	0.6
		6.2	0.1
		0.4	1
		1.9	0.9
		0.2	0.7
		0.2	0.8
		0.1	2.9
		1	0.1
		0.7	0.1
		0.2	1.1
		1.8	2
		0.9	13.6
		4.4	4
		8.2	1.1
		0.4	1.8
		2.9	1.7
		0.5	0.2
		10.8	2.2
		0.2	1.2
		0.5	0.2
		1.1	0.1
		10	0.8
		2.6	0.2
		0.2	33.8
		1.9	2.2
		6.5	0.6
		8.4	2.7
		34	3.5
		0.8	2.5
		1.1	1
		11.5	3
		0.1	0.5
		0.2	0.3
		2.2	5.8
		13.6	0.5
		0.1	1.2
		26.2	0.1
		0.3	5.4
		2.9	0.3
		3	4.2
		0.7	5.3
		1.2	0.3
		0.6	0.2
		2.1	0.1
		1	1.7
		0.3	5.2
		0.2	1.8
		0.2	0.5
		0.1	8
		0.7	1.5
		1.9	0.4
		3.6	4
		4.4	2
		1.3	0.1
		2.8	34.3
		0.7	0.2
		0.7	0.3
		2.4	3.8
		6.7	1.5
		5.3	1.2
		0.2	4.7
		12.1	11.5
		1.2	0.1
		0.2	0.6
		1.3	1.3
		0.1	4
		3	0.1
		0.1	1.9
		44.4	0.2
		0.9	0.1
		4.4	4.8
		1	2.2
		3.2	0.2
		0.2	0.7
		0.1	0.4
		1.7	0.7
		0.1	0.1
		0.8	0.1
		0.2	0.9
		6.3	0.5
		1	0.4
		4.3	2
		10.8	5
		0.2	0.1
		3.9	0.2
		0.6	0.7
		0.1	0.5
		0.7	0.2
		0.2	2.1
		0.1	1.2
		0.4	0.3
		10.7	0.2
		20.3	0.1
		0.2	0.1
		1.1	3.4
		0.1	0.1
		0.2	0.5
		0.9	2.6
		0.4	2.2
		1	1.1
		5	16.3
		0.7	0.4
		0.4	0.1
		0.1	0.1
		12.8	0.2
		2.1	0.6
		0.8	1.1
		2.3	5.6
		12.1	0.4
		0.8	55.3
		4.8	4.1
		0.3	5
		9.2	1.4
		1.8	0.4
		4	0.4
		0.6	0
		0.4	3.4
		0.1	1.1
		0.2	0.1
		2	0.5
		0.3	0.4
		1.7	0.2
		4.3	0.3
		5	0.3
		3.8	3.2
		0.2	2
		2.7	0.3
		0.4	0.1
		1.7	0.1
		9.1	5.5
		0.7	0.5
		2.7	2.1
		1	0.6
		10.7	0.5
		1	0.5
		0.9	1.5
		1.1	0.5
		0.3	0.7
		0.7	3.8
		0.6	0.5
		0.8	2.5
		3	2.2
		20.4	0.3
		0.8	1.1
		10.7	1.3
		0.6	0.1
		5.3	4.8
		25.7	1.9
		0.2	0.2
		0.4	0.9
		0.5	2.7
		0.7	6
		1.1	1.3
		1.1	0.5
		2.8	2.1
		1	0.2
		0.1	0.3
		5.1	0.6
		0.4	0.1
		0.2	0.4
		0.2	9.2
		0.3	0.4
		1.3	1.2
		2.6	3.1
		16	2.7
		0.7	0.4
		3.6	2.8
		0.1	6.4
		0.6	5.6
		2.6	0.4
		0.1	7.8
		1.4	1.4
		1.7	1.2
		0.5	1.7
		0.4	1
		0.2	8
		5.5	1.6
		0.4	1.3
		2.6	0.4
		0.1	1.7
		3.7	3.8
		0.9	12.2
		0.2	1.8
		0.3	0.6
		0.1	2.9
		3	1.2
		0.9	2.9
		0.3	0.8
		0.5	0.4
		1.2	0.4
		13.6	17.8
		0.5	0.2
		2	0.3
		0.2	1
		1	0.6
		0.1	0.5
		0.1	3.7
		1.6	1.4
		4.9	0.2
		8.9	1.2
		0.7	1
		10.3	0.8
		1.1	0.2
		5.4	1.3
		0.1	1.7
		0.1	0.1
		0.5	1.1
		0.6	2.1
		0.7	1.5
		4.2	1.7
		0.4	13.1
		0.2	0.2
		0.2	0.6
		1.2	1.6
		32	5.6
		2.3	1.6
		1.9	0.5
		3.8	1.8
		1	2.7
		3.6	0.7
		5.3	1.1
		7.6	4
		0.1	4.2
		0.1	0.8
		0.1	1.2
		0.8	0.7
		0.2	1.2
		0.1	0.2
		0.8	2.5
		4.8	3.9
		0.6	0.5
		13.4	0.5
		10	0.3
		1.4	5.9
		0.3	3.8
		0.7	0.9
		2.1	2
		0.1	1.6
		0.8	0.8
		0.2	137
		3.4	2.1
		1.4	0.4
		50.7	5
		1.9	1.2
		1.2	0.9
		1.4	3.8
		2.4	0.6
		1.3	2.2
		0.6	0.9
		8.8	0.5
		2.3	0.5
		9.3	2.4
		0.8	0.2
		0.8	1.3
		0.7	68.9
		0.4	1.7
		0.8	0.3
		22.7	0.1
		0.4	0.2
		1.2	0.2
		3.9	1
		0.1	0.1
		0.6	8.5
		1.6	1.7
		2.3	23
		0.2	0.8
		1.7	1.6
		0.1	0.9
		2.7	0.2
		1.1	0.1
		0.1	0.9
		3.2	2.9
		1.4	0.3
		20.5	0.2
		1.2	1
		3.2	0.5
		0.1	2.3
		0.1	1.6
		0.3	0.7
		0.5	0.5
		0.4	0.3
		9.5	0.4
		3.4	0.6
		2.5	1.3
		11.1	0.1
		0.6	1
		3.2	0.1
		2	0.1
		1.5	2
		8.5	0.5
		1.3	0.1
		0.1	1.7
		2.3	7.3
		1.6	2.2
		0.1	1
		1.1	1.3
		0.5	2.7
		11	0.3
		1.8	1.1
		0.1	1.6
		2.4	0.2
		0.2	0.3
		14	1.7
		0.1	0.4
		2.8	0.1
		7.9	0.8
		5.9	2
		1.1	0.8
		1.9	0.3
		0.9	0.8
		0.6	1
		3.2	2.1
		2.4	19.7
		1.7	0.7
		0.5	0.3
		2	0.8
		4.4	1.3
		6.3	5.8
		0.7	0.4
		6	8.3
		2	1.3
		0.5	0.2
		0.3	0.6
		2.7	1.1
		1.5	1.8
		0.9	0.1
		0.2	1.7
		3.7	2.7
		0.4	0.3
		0.4	10.8
		0.9	0.1
		1.4	6.2
		0.7	0.7
		46.1	3.6
		0.1	2.6
		1.1	0.2
		1.4	1.4
		3.6	3
		6.3	4.4
		1.5	4.4
		0.1	2.9
		4.5	4.7
		0.1	1.9
		4.9	0.2
		2.7	1.3
		4.2	0.5
		6	0.2
		0.2	15.9
		19.6	0.3
		5.1	1.1
		0.2	0.1
		3	1.8
		0.2	1.5
		0.9	0.1
		0.1	0.2
		0.2	6.1
		0.2	1.1
		0.3	0.3
		0.5	6.8
		5.4	2.7
		0.3	3.8
		0.2	2.9
		0.3	11.2
		0.4	0.1
		0.3	0.2
		0.1	1.3
		11.9	1.9
		12.9	1.3
		0.2	0.7
		1	2.7
		0.1	13.3
		2.1	3.5
		0.2	0.1
		0.1	1.1
		0.1	0.2
		0.1	7.2
		2	0.3
		0.5	0.1
		0.1	6.1
		0.3	0.6
		20	2.6
		1	0.6
		2.8	0.9
		0.3	5.7
		0.5	2.2
		0.5	0.4
		0.8	0.6
		8.1	4.3
		0.1	3
		0.3	1.9
		0.8	0.3
		0.7	3.3
		0.6	2.8
			1.4
			1.1
			0.3
			0.2
			0.8
			0.4
			1.7
			1.2
			0.8
			4.2
			1.5
			0.3
			0.7
			0.1
			0.4
			1.6
			11.3
			1.3
			0.3
			0.1
			2.3
			0.4
			0.7
			0.4
			5.4
			0.1
			1.5
			1.1
			0.1
			0.2
			1.9
			0.3
			0.1
			0.8
			0.2
			1
			2.5
			5.7
			2.6
			0.8
			2.8
			1.6
			2.8
			21.4
			0.1
			0.1
			0.3
			0.1
			1.2
			5.4
			1.2
			1.8
			0.7
			5.6
			1.1
			0.6
			0.5
			1.3
			1.9
			2.3
			3.1
			0.3
			2
			0.5
			0.2
			6.3
			0.7
			0.4
			0.6
			0.9
			1.1
			1.1
			0.7
			0.2
			0.7
			0.4
			1.1
			0.1
			1.1
			0.3
			2.7
			0.2
			0.4
			1.4
			0.7
			1.8
			7.2
			1.9
			5.1
			0.4
			0.4
			1.6
			0.2
			0.2
			0.3
			1.4
			1.4
			0.2
			0.1
			0.2
			0.1
			5
			0.2
			1.2
			0.5
			0.1
			1.6
			1.7
			0.3
			0.4
			2.1
			0.1
			1.6
			0.4
			7.6
			4.8
			0.6
			0.6
			0.1
			0.1
			0.7
			3.3
			2.1
			2
			1.6
			3
			8.6
			0.3
			5.8
			0.1
			0.1
			0.3
			1.5
			0.9
			0.2
			15
			0.1
			0.4
			0.4
			0.3
			5.2
			0.1
			3.3
			3.3
			5.1
			0.3
			1.2
			4.4
			20.8
			1.8
			0.7
			0.4
			5.4
			5.8
			0.5
			0.6
			6
			0.5
			0.1
			1.6
			3.7
			4.9
			0.3
			4.2
			3.9
			2.7
			0.1
			0.4
			0.1
			1.2
			1.7
			0.6
			0.1
			0.4
			0.4
			0.6
			0.8
			0.6
			1
			0.1
			0.4
			0.6
			0.7
			8.7
			1.8
			3.8
			2.1
			3.4
			1.2
			1.2
			1.3
			0.5
			1.3
			0.3
			0.8
			8.9
			3.2
			0.9
			0.6
			0.5
			4.6
			0.4
			0.3
			1.8
			4.2
			0.8
			0.2
			2.9
			0.3
			1.1
			0.2
			3.1
			26.4
			12.4
			0.9
			10.8
			1.8
			3.4
			3.5
			0.5
			0.1
			0.1
			0.6
			0.6
			0.5
			0.3
			2.9
			1.4
			1.4
			0.1
			1.1
			1.1
			0.1
			2.9
			0.4
			0.3
			0.2
			0.2
			0.3
			0.6
			0.4
			0.5
			0.3
			4.9
			2.4
			0.6
			0.3
			1.8
			0.3
			30.5
			0.4
			3.8
			0.5
			0.2
			0.1
			1
			0.2
			0.1
			0.5
			0.3
			0.3
			0.3
			0.2
			0.3
			0.9
			0.5
			0.6
			4.4
			1.8
			0.2
			0.1
			2.1
			0.4
			0.4
			3.6
			0.5
			0.7
			0.8
			2.3
			0.6
			0.5
			2.5
			2
			0.5
			1.9
			0.4
			0.2
			1.1
			0.4
			1.3
			0.4
			1.6
			0.2
			0.5
			0.4
			0.2
			0.5
			0.2
			2.8
			0
			1.4
			0.2
			0.3
			0.3
			0.7
			0.9
			0.5
			0.1
			0.5
			3
			3
			0.5
			1.4
			3.2
			0.7
			1.1
			0.3
			5.2
			1.3
			2.9
			0.5
			11.7
			1.8
			0.4
			0.1
			15.8
			0.4
			0.2
			6.3
			0.6
			0.2
			2.7
			0.1
			1.1
			0.3
			0.1
			0.9
			1.1
			8.8
			11.5
			0.1
			0.3
			48.7
			0.9
			1.5
			2.4
			1.9
			3.5
			1.3
			0.5
			2
			0.1
			0.2
			0.4
			0.1
			0.1
			0.2
			0.6
			4.9
			0.5
			1.7
			1
			1.2
			1
			0.2
			0.2
			1.2
			5.6
			1
			0.2
			2
			0.4
			2.9
			5.2
			1
			0.4
			0.5
			0.7
			4
			1
			1.1
			3.7
			0.6
			1.1
			0.4
			0.9
			1.1
			1.3
			1.1
			14.5
			0.6
			3.1
			3.7
			0.1
			0.2
			2.2
			2.1
			2.2
			1.2
			0.2
			3.5
			11.7
			0.9
			1.8
			0.3
			0.7
			0.9
			1.2
			1.7
			1.4
			5.6
			0.1
			2.4
			0.4
			2.6
			7.4
			1.3
			1.4
			4.4
			0.2
			1.9
			3.6
			2.2
			3.6
			0.6
			4
			1.4
			1.2
			0.5
			3.1
			8.1
			1.2
			2.9
			2.5
			0.3
			4.9
			0.2
			1.3
			0.8
			0.7
			0.1
			0.1
			1.7
			0.1
			3.7
			1.6
			1
			1.4
			1.1
			1
			0.5
			15.9
			0.7
			9.8
			0.5
			0.6
			0.5
			0.5
			2.7
			0.3
			0.1
			75.4
			1.6
			0.4
			0.6
			1.1
			1
			0.1
			0.7
			0.5
			0.9
			2.4
			0.5
			1.7
			0.1
			4.2
			2.2
			9.5
			12.3
			0.8
			0.1
			0.1
			7.3
			0.3
			0.2
			0.1
			0.6
			5.4
			2.4
			1
			0.2
			3.8
			1.6
			3
			4.2
			0.5
			0.1
			0.5
			3.8
			0.5
			0.2
			0.4
			0.8
			2.2
			1.4
			1.5
			3.7
			0.8
			0.9
			0.3
			0.5
			0.1
			0.3
			8
			2.5
			2
			0.9
			0.5
			1.9
			2.6
			4.6
			0.5
			2.1
			2.3
			0.5
			2.1
			0.1
			23.3
			4.7
			0.6
			0.8
			0.6
			0.5
			0.3
			8.8
			0.1
			2
			1.4
			0.6
			2.5
			0.3
			2.1
			1.9
			10.3
			0.4
			2.2
			0.2
			0.6
			1.5
			1.6
			1.7
			0.3
			1.1
			0.4
			0.9
			0.5
			0.7
			0
			2.1
			0.2
			2.3
			12.1
			2.7
			0.2
			0.1
			1.6
			2.3
			1.8
			4.8
			6.1
			2.8
			2.2
			0.3
			1.2
			0.8
			0.2
			3.6
			0.3
			0.6
			22.6
			6.5
			0.5
			2.7
			1.1
			4.9
			0.4
			0.6
			0.1
			0.2
			0.2
			0.3
			0.2
			0.2
			0.5
			4.6
			0.2
			5.2
			0.2
			0.4
			3.1
			2
			0.1
			0.4
			0.4
			0.2
			0.7
			16.5
			0.4
			6.2
			1
			1.2
			1.5
			0.3
			6.2
			3.4
			0.7
			0.6
			2.8
			0.8
			0.9
			3.6
			1.2
			0.9
			1.5
			0.3
			4.3
			1.3
			0.6
			0.9
			0.3
			0.2
			0.2
			1.5
			0.1
			9.6
			0.2
			0.4
			0.4
			1.6
			1.9
			0.2
			3.4
			0.1
			3.4
			1.4
			9.8
			0.8
			0.3
			1.3
			1.6
			11.4
			1.8
			1.1
			31.2
			0.9
			0.2
			0.2
			2.9
			0.3
			0.1
			1.4
			0.8
			13.9
			42.7
			0.5
			0.1
			0.6
			0.2
			0.2
			0.3
			5.2
			6.9
			0.4
			1.6
			7.9
			0.1
			0.2
			1.1
			0.4
			4.1
			1.3
			0.3
			4
			0.2
			1.1
			0.8
			0.3
			3.2
			8.2
			2.6
			1.3
			68.1
			0.2
			7.9
			1.4
			0.2
			0.5
			3.9
			1.8
			0.3
			0.4
			0.4
			0.9
			7.1
			5.5
			1
			0.4
			0.5
			1
			1.1
			1.2
			0.2
			1.3
			4
			0.3
			3.9
			0.3
			8
			5.9
			0.7
			0.3
			2.9
			0.2
			0.3
			1.6
			3.7
			1.5
			1.7
			2.2
			1.4
			13
			1.4
			3.5
			11.8
			13
			0.2
			0.1
			0.1
			0.2
			1.1
			0.5
			0.2
			0.9
			1.3
			0.3
			2.4
			0.3
			1.4
			6.1
			0.9
			0.9
			0.1
			0.3
			0.2
			4.6
			0.2
			2.5
			0.1
			2.4
			1
			0.2
			0.1
			0.2
			1.5
			0.4
			2.7
			3.9
			3.1
			5
			0.6
			1.2
			3.3
			4.4
			0.2
			0.5
			2.5
			1.4
			0.3
			2.6
			1.9
			22.8
			3
			7.4
			2.6
			0.3
			7.1
			0.3
			26.9
			0.8
			0.5
			0.4
			0.2
			0.5
			1.1
			1.3
			7.6
			0.3
			0.2
			0.2
			1.8
			0.3
			1.4
			3.1
			0.2
			0.1
			0.4
			7.6
			11.1
			0.6
			1.8
			0.2
			0.1
			63.2
			0.6
			2.9
			0.1
			0.1
			0
			0.2
			0.1
			5.8
			0.3
			16.1
			0.6
			2
			0.5
			4.3
			4.2
			0.6
			18
			2.1
			1.5
			21.9
			0.9
			7.1
			1.2
			0.3
			0.1
