# Supplementary material for: Tight bending of the Ndc80 complex provides intrinsic regulation of its binding to microtubules
Source: eLife. 2019 May 2;8:e44489. doi: 10.7554/eLife.44489 (PMC6516834; doi:10.7554/eLife.44489)
Supplement: Figure 3—figure supplement 1—source data 1. [file elife-44489-fig3-figsupp1-data1.xlsx]

## Sheet: Sheet1
Figure 3-supplement 1-source data 1
		Positive Control	Negative Control	Ndc80
Post acceptor bleach fluorescence/pre acceptor bleach fluorescence		14.7854	0.657559	0.591586
		16.7218	0.983342	2.87526
		7.37475	0.874101	1.73995
		1.05923	1.16423	2.5627
		10.8703	0.964734	1.0193
		16.7961	1.11132	4.40025
		5.86846	0.925606	2.79604
		18.0318	0.957671	0.940732
		-116.714	0.623061	0.586953
		9.55341	1.01313	1.17738
		6.78283	0.967561	1.08777
		11.3572	1.10409	2.53918
		6.34274	0.976665	3.1816
		5.23075	0.944525	1.16005
		8.78309	1.0281	0.908551
		8.1942	0.789831	0.904277
		8.87479	1.02092	5.89852
		10.3494	0.891342	1.36317
		9.62044	0.908503	1.20465
		9.48817	0.853483	1.50354
		25.6214	1.09082	0.730059
		9.4985	1.07425	2.15437
		10.3034	0.956739	0.835248
		7.82621	1.06952	1.18289
		5.98245	1.19622	1.30703
		7.92138	1.14542	1.81982
		17.7646	0.938721	4.89197
		8.5593	0.821929	1.19003
		10.9308	0.989877	0.711069
		7.81406	0.669432	0.942923
		10.2339	1.05169	1.35355
		4.79955	0.901456	1.0331
		9.0234	0.85672	1.66386
		15.0538	0.945456	1.16977
		19.5202	1.12009	1.27535
		7.18017	0.929846	0.895685
		8.48179	0.950015	1.1769
		6.48668	1.00438	1.63469
		14.212	1.00981	0.995771
		6.66653	1.05647	1.19278
		8.61694	0.759767	1.12179
		178.216	0.9391	0.912512
		9.5014	0.893596	1.49336
		7.61024	1.03793	1.00915
		4.33087	1.01993	0.924275
		7.02141	0.898778	1.11211
		6.53336	1.22468	0.961417
		6.96022	0.874674	0.992841
		5.15815	1.16874	1.47672
		7.12357	0.923763	1.82728
		6.11594	0.879476	0.801343
		7.62588	0.969906	1.9782
		7.7749	0.993922	1.28376
		5.15436	1.17463	1.30885
		6.27873	1.10994	0.969026
		5.46475	1.18821	0.958948
		5.64005	0.996972	1.05257
		6.86411	1.00772	0.888665
		6.349	0.987235	1.57213
		25.2206	0.67536	0.832424
		6.47251	1.05445	1.28997
		3.11283	0.980526	0.954427
		7.173	1.0326	3.23078
		6.34669	1.01141	0.871203
		5.36696	1.19282	0.922505
		7.27899	1.0709	0.918003
		3.69029	1.00832	0.777668
		7.27161	0.933825	1.21286
		6.75379	0.913219	2.24941
		5.07598	0.969536	3.35592
		5.87366	1.04363	0.80573
		8.52102	0.855931	0.826609
		6.47729	0.912879	0.958691
		7.19205	0.904855	0.56158
			1.21833	0.904976
			0.929414	1.13908
			1.28427	3.60975
			1.0149	2.31989
			1.14885	0.850209
			0.969791	0.924847
			0.906034	63.5052
			0.990824	1.02555
			1.10106	0.980979
			1.24646	0.648548
			0.99729	1.0762
			0.843093	1.06149
			0.979175	0.968872
			1.24698	0.96024
			0.627718	1.60808
			1.07993	0.896517
			0.870287	1.02635
			0.93546	0.963836
			0.954518	1.10871
			1.12139	0.948812
			0.906391	1.0506
			0.947514	1.00385
			0.615849	1.02242
			1.00235	1.1386
			1.01276
			1.09214
			0.981587
			0.76495
			1.01432
			0.870309
			0.98414
			1.12216
			0.891112
			0.909168
			1.07145
			0.923719
			0.93573
			1.04818
			1.18763
			1.12988
			1.15968
			0.923201
			0.84965
			1.00591
			1.0079
			0.903608
			0.872315
			0.96002
			0.883319
			1.16628
			0.893749
			0.969139
			1.05065
			0.916363
			1.0299
			1.04852
			1.0123
			0.88786
			0.863887
			1.03523
			1.10518
			0.995664
			0.875349
			1.26985
			1.01105
			1.17245
			1.10042
			1.17804
			1.13946
			0.94331
			0.990626
			1.15006
			0.605535
			1.10775
			1.26672
			0.955842
			0.959711
			1.13133
			0.973004
			0.638925
