# Supplementary material for: Tight bending of the Ndc80 complex provides intrinsic regulation of its binding to microtubules
Source: eLife. 2019 May 2;8:e44489. doi: 10.7554/eLife.44489 (PMC6516834; doi:10.7554/eLife.44489)
Supplement: Figure 3—source data 1. [file elife-44489-fig3-data1.xlsx]

## Sheet: Sheet1
Figure 3-source data 1	Ndc80 FRET trace n	number of "up" transitions	number of "down" transitions	total time above threshold (frames)	total time below threshold (frames)
	1	0	0	20	0				number of "up" transitions	number of "down" transitions	total time above threshold (frames)	total time below threshold (frames)
Switching rate/thresholding analysis	2	0	0	20	0		Totals	Totals	95	104	1079.53	4035.47
	3	0	0	0	20			Total rate either way (1/sec)	0.389052
	4	0	0	0	20			Uncertainty, rate either way (1/sec)	0.0275792
	5	0	0	20	0			Total Closing rate (1/sec)	0.235412
	6	2	2	1.63584	18.3642			Uncertainty, closing rate (1/sec)	0.0241528
	7	1	1	0.246926	19.7531			Total Opening rate (1/sec)	0.963383
	8	2	3	2.87725	17.1227			Uncertainty, closing rate (1/sec)	0.0944675
	9	0	0	0	20
	10	0	0	0	20
	11	0	0	0	20
	12	0	0	0	20
	13	0	0	20	0
	14	0	0	0	17
	15	0	0	17	0
	16	0	0	0	17
	17	0	0	0	17
	18	0	0	0	17
	19	0	0	0	17
	20	0	0	0	15
	21	0	0	21	0
	22	0	0	0	21
	23	0	0	0	18
	24	0	0	0	18
	25	1	1	0.0777898	26.9222
	26	4	4	4.05113	22.9489
	27	5	5	3.32157	23.6784
	28	0	0	0	27
	29	0	0	0	27
	30	0	0	0	27
	31	0	0	0	24
	32	0	0	0	27
	33	0	0	0	27
	34	0	0	0	27
	35	0	0	0	27
	36	0	0	0	27
	37	0	0	27	0
	38	0	0	27	0
	39	1	1	0.989774	26.0102
	40	0	0	0	27
	41	0	0	0	19
	42	1	1	1.57457	17.4254
	43	0	0	0	19
	44	0	1	5.44843	14.5516
	45	0	0	0	20
	46	3	4	11.2905	8.70947
	47	0	0	0	20
	48	5	5	10.4258	9.57418
	49	2	2	0.541573	19.4584
	50	0	0	20	0
	51	0	1	6.10471	13.8953
	52	0	0	0	20
	53	0	0	0	20
	54	0	0	0	20
	55	0	0	20	0
	56	0	0	0	20
	57	0	0	20	0
	58	0	0	0	20
	59	0	0	0	20
	60	4	5	8.59908	11.4009
	61	0	0	0	19
	62	0	0	0	20
	63	0	0	0	11
	64	0	0	0	15
	65	2	2	16.4404	0.559604
	66	1	1	18.79	0.210042
	67	2	2	14.4602	4.5398
	68	0	0	0	9
	69	0	0	18	0
	70	0	0	0	12
	71	0	0	0	23
	72	0	0	0	11
	73	0	0	0	11
	74	2	2	19.8417	1.1583
	75	1	1	11.615	0.385021
	76	0	0	0	12
	77	0	0	0	8
	78	0	0	0	17
	79	0	1	27.9447	1.05527
	80	0	0	0	24
	81	0	0	0	17
	82	1	0	0.0925902	16.9074
	83	0	0	0	17
	84	0	0	9	0
	85	0	0	0	26
	86	0	0	0	28
	87	2	3	2.93289	25.0671
	88	1	1	27.5903	0.409737
	89	1	1	24.3591	0.640873
	90	0	0	0	22
	91	0	0	0	18
	92	0	0	0	15
	93	2	2	0.607363	14.3926
	94	0	0	0	30
	95	1	2	3.73184	26.2682
	96	0	0	0	17
	97	0	0	0	15
	98	0	0	0	17
	99	0	0	0	17
	100	0	0	0	27
	101	2	2	22.2902	4.70981
	102	0	0	0	27
	103	1	1	16.3408	11.6592
	104	0	0	0	28
	105	0	0	0	28
	106	1	1	0.59553	27.4045
	107	1	1	1.86735	26.1327
	108	0	0	0	28
	109	0	0	0	28
	110	0	1	20.3565	11.6435
	111	0	0	0	32
	112	0	0	0	32
	113	0	0	0	9
	114	0	0	34	0
	115	2	1	0.0588365	33.9412
	116	0	0	0	34
	117	0	0	0	34
	118	0	0	0	34
	119	0	0	0	29
	120	0	0	0	29
	121	6	6	20.7732	8.22679
	122	0	0	0	29
	123	0	0	0	29
	124	0	0	0	24
	125	0	0	0	16
	126	0	0	0	16
	127	0	0	0	33
	128	0	0	0	33
	129	0	0	0	33
	130	0	0	0	33
	131	0	1	28.9926	4.00745
	132	0	0	0	33
	133	0	0	0	20
	134	0	0	0	20
	135	0	0	0	20
	136	1	1	0.158355	19.8416
	137	0	0	0	27
	138	1	0	34.5823	0.417666
	139	1	1	0.0819073	34.9181
	140	0	0	0	35
	141	0	0	0	35
	142	4	4	9.92715	25.0728
	143	0	0	0	35
	144	0	0	0	35
	145	0	0	0	35
	146	1	2	22.2758	30.7242
	147	2	2	29.0315	0.9685
	148	0	0	0	30
	149	0	0	0	30
	150	0	0	0	30
	151	0	0	0	30
	152	0	1	26.5284	3.47156
	153	0	0	0	30
	154	0	1	17.858	12.142
	155	6	5	9.63266	20.3673
	156	0	0	0	30
	157	0	0	0	30
	158	0	0	0	26
	159	1	1	0.713571	25.2864
	160	0	0	0	45
	161	0	0	0	45
	162	4	3	24.6322	20.3678
	163	0	0	0	45
	164	2	2	26.6287	11.3713
	165	0	0	0	38
	166	0	0	0	38
	167	0	0	25	0
	168	1	0	0.182423	24.8176
	169	1	0	0.255001	24.745
	170	2	2	5.09884	24.9012
	171	0	0	0	32
	172	0	0	0	32
	173	0	0	0	23
	174	1	1	17.8458	5.15415
	175	0	0	0	23
	176	0	0	0	27
	177	0	0	0	27
	178	0	0	0	27
	179	0	0	0	27
	180	0	0	0	27
	181	0	0	0	27
	182	1	1	25.3204	1.67959
	183	1	1	0.0406916	26.9593
	184	1	1	0.755774	26.2442
	185	0	0	0	27
	186	1	1	0.0865707	26.9134
	187	0	0	0	27
	188	0	0	0	32
	189	0	0	32	0
	190	0	0	0	32
	191	0	1	26.9237	5.0763
	192	0	0	28	0
	193	0	0	28	0
	194	0	0	0	25
	195	0	0	0	25
	196	0	0	0	25
	197	0	0	0	25
	198	0	0	0	20
	199	0	0	20	0
	200	0	0	0	20
	201	0	0	0	20
	202	3	4	16.9001	3.09988
	203	0	0	0	20
	204	0	0	0	20
	205	0	0	0	21
	206	0	0	21	0
	207	0	1	0.202993	20.797
