# Supplementary material for: Tight bending of the Ndc80 complex provides intrinsic regulation of its binding to microtubules
Source: eLife. 2019 May 2;8:e44489. doi: 10.7554/eLife.44489 (PMC6516834; doi:10.7554/eLife.44489)
Supplement: Figure 3—source data 2. [file elife-44489-fig3-data2.xlsx]

## Sheet: Sheet1
Figure 3-source data 2		2 days, 2 slides	2 days, 3 slides	4 days, 6 slides	2 days, 2 slides		2 days, 3 slides
corrected FRET values within histograms		Positive Control	Ndc80 Positive Control	Ndc80	Negative Control		Ndc80+100X Spc24/Spc25
		-0.0509895	-0.440944	1.1681	267.809		1.0482
		-6.74e-05	-0.373497	1.1266	27.5806		1.04046
		0.0817475	-0.353608	1.11795	20.234		1.02612
		0.0876915	-0.344046	1.11671	18.5501		1.0229
		0.0918704	-0.331193	1.10166	13.0536		1.01438
		0.0983464	-0.318583	1.07816	7.8436		1.01418
		0.119708	-0.316862	1.0755	5.95227		0.999544
		0.122946	-0.313926	1.0691	5.1602		0.99657
		0.127245	-0.294836	1.06809	3.61039		0.995811
		0.130323	-0.291201	1.06687	3.11181		0.994365
		0.142228	-0.28453	1.06496	1.80232		0.991746
		0.153421	-0.284388	1.05791	0.449102		0.986402
		0.155712	-0.281553	1.05675	0.435601		0.977649
		0.157171	-0.268194	1.05609	0.4334		0.977198
		0.162908	-0.24873	1.05563	0.412648		0.976657
		0.171785	-0.248629	1.05224	0.40506		0.976519
		0.177526	-0.247172	1.05093	0.388335		0.971774
		0.178883	-0.24076	1.04592	0.37806		0.969972
		0.179534	-0.238812	1.04379	0.376424		0.969173
		0.194261	-0.222909	1.03625	0.376023		0.968381
		0.196518	-0.222551	1.03536	0.37169		0.964076
		0.197654	-0.21851	1.03317	0.369634		0.959695
		0.199297	-0.208622	1.03245	0.358636		0.951766
		0.201441	-0.208541	1.03064	0.352735		0.947681
		0.209197	-0.204033	1.02884	0.352305		0.944755
		0.209902	-0.192433	1.02871	0.348371		0.942189
		0.214721	-0.185747	1.02585	0.345256		0.940631
		0.218131	-0.181523	1.02427	0.32944		0.937771
		0.222602	-0.181383	1.01932	0.32874		0.93387
		0.223007	-0.172358	1.01824	0.325211		0.926649
		0.230195	-0.166849	1.01647	0.324494		0.924483
		0.231565	-0.159676	1.0132	0.322312		0.923573
		0.243616	-0.155063	1.00906	0.321073		0.922145
		0.246502	-0.149971	1.00892	0.320076		0.922143
		0.249635	-0.142271	1.00854	0.314216		0.920832
		0.255671	-0.141878	1.00752	0.31291		0.919722
		0.260034	-0.137644	1.0066	0.31135		0.918656
		0.271254	-0.136196	1.00631	0.308836		0.912397
		0.282209	-0.130727	1.0029	0.308274		0.908121
		0.308791	-0.129954	1.00245	0.304514		0.904393
		0.381202	-0.125227	0.999136	0.292995		0.903361
		0.50162	-0.118473	0.997579	0.288802		0.902368
		0.521272	-0.115053	0.992406	0.288788		0.901839
		0.524063	-0.107782	0.992114	0.288474		0.901419
		0.547399	-0.0936928	0.990875	0.28768		0.891417
		0.553825	-0.0912362	0.990359	0.286265		0.890894
		0.558093	-0.0824618	0.989659	0.284833		0.889137
		0.569767	-0.0776353	0.988756	0.284778		0.886124
		0.571087	-0.0605387	0.988296	0.283827		0.884007
		0.575493	-0.0604113	0.988144	0.283453		0.879408
		0.576064	-0.0594134	0.986805	0.280978		0.872996
		0.577778	-0.0583393	0.986011	0.280217		0.871298
		0.584238	-0.0573565	0.98556	0.278989		0.870767
		0.595775	-0.0514253	0.983453	0.275283		0.868593
		0.597716	-0.0483507	0.981241	0.274585		0.868062
		0.606856	-0.0474964	0.981133	0.274485		0.866107
		0.607138	-0.0474962	0.980682	0.274112		0.863334
		0.608124	-0.0452467	0.980532	0.272538		0.862261
		0.612009	-0.0396002	0.97843	0.272266		0.861851
		0.612038	-0.0379393	0.975761	0.270215		0.855373
		0.617927	-0.0325466	0.974771	0.270148		0.855273
		0.618611	-0.0315534	0.974223	0.268349		0.853733
		0.619521	-0.0256192	0.973651	0.266332		0.848735
		0.620606	-0.0209442	0.971861	0.266119		0.839796
		0.623555	-0.0103798	0.969245	0.264653		0.839556
		0.624759	-0.00954631	0.969084	0.263935		0.838321
		0.630128	-0.00675074	0.966128	0.26291		0.829941
		0.63447	-0.000787737	0.964905	0.259157		0.827731
		0.636381	0.00352803	0.964168	0.257177		0.82656
		0.636405	0.00653872	0.963142	0.256144		0.821466
		0.637129	0.00684606	0.957682	0.255456		0.819962
		0.639125	0.007019	0.957414	0.255052		0.81958
		0.639332	0.0080403	0.956532	0.253054		0.81664
		0.641008	0.0310324	0.955807	0.25165		0.809978
		0.643015	0.0928918	0.955067	0.251553		0.808892
		0.646798	0.210804	0.95399	0.251512		0.808292
		0.650356	0.215986	0.952722	0.251198		0.804857
		0.650782	0.217398	0.950265	0.250879		0.803981
		0.6528	0.253528	0.949156	0.250848		0.80174
		0.653513	0.26065	0.948573	0.250713		0.800074
		0.654041	0.264241	0.947774	0.250213		0.798623
		0.655374	0.279659	0.946814	0.250114		0.790982
		0.655939	0.285519	0.945164	0.249973		0.788023
		0.659652	0.295805	0.943321	0.249225		0.787812
		0.662875	0.304443	0.943089	0.24638		0.786932
		0.663001	0.311781	0.941562	0.243659		0.786094
		0.663295	0.330638	0.939346	0.239923		0.786031
		0.665489	0.333809	0.939081	0.239331		0.785958
		0.666373	0.335257	0.937867	0.239032		0.784147
		0.666875	0.366008	0.937655	0.238558		0.781681
		0.667016	0.368134	0.937635	0.238211		0.779769
		0.667327	0.379123	0.93395	0.236382		0.777741
		0.668057	0.381571	0.933142	0.23587		0.775578
		0.668283	0.38295	0.932212	0.234909		0.774255
		0.668668	0.39114	0.931381	0.234732		0.773399
		0.669484	0.39295	0.928463	0.234469		0.772189
		0.670911	0.407273	0.926658	0.234354		0.772133
		0.671124	0.413895	0.92022	0.232622		0.771939
		0.671213	0.417452	0.916829	0.230402		0.771883
		0.671629	0.419934	0.916518	0.230094		0.770078
		0.672818	0.426016	0.915683	0.229574		0.769787
		0.673053	0.428752	0.914009	0.228561		0.769341
		0.673648	0.431983	0.909064	0.228238		0.76882
		0.674713	0.442834	0.907867	0.227661		0.760972
		0.674719	0.449694	0.904025	0.227415		0.759781
		0.675058	0.456293	0.899606	0.225043		0.75771
		0.678708	0.457819	0.891849	0.22441		0.757677
		0.680368	0.460659	0.890427	0.22386		0.75637
		0.681217	0.473594	0.887555	0.219321		0.756074
		0.681593	0.477663	0.887474	0.218817		0.755672
		0.682117	0.477745	0.880456	0.218638		0.75395
		0.683499	0.478429	0.88019	0.217579		0.753702
		0.683668	0.483707	0.879948	0.217134		0.752425
		0.684047	0.49509	0.875734	0.215975		0.752002
		0.68485	0.516661	0.873419	0.215854		0.750569
		0.687486	0.520806	0.868645	0.21487		0.749941
		0.687723	0.52378	0.864225	0.214281		0.749685
		0.68911	0.528794	0.861959	0.213571		0.746301
		0.691185	0.531464	0.854459	0.213284		0.744535
		0.693589	0.53481	0.853328	0.21143		0.743131
		0.694789	0.55182	0.846734	0.211309		0.741888
		0.694981	0.554925	0.843939	0.208938		0.741216
		0.69523	0.557532	0.837166	0.208499		0.740627
		0.695475	0.571896	0.835845	0.206892		0.740604
		0.697135	0.575635	0.833514	0.205986		0.739477
		0.697342	0.577622	0.829439	0.205856		0.739455
		0.697506	0.57946	0.829031	0.204787		0.739367
		0.698332	0.597765	0.824055	0.204189		0.737075
		0.69866	0.600339	0.821856	0.203573		0.737038
		0.699415	0.604838	0.818426	0.203079		0.736501
		0.700549	0.627245	0.813281	0.202803		0.735729
		0.700865	0.628019	0.81195	0.202551		0.729651
		0.701393	0.650671	0.811143	0.201756		0.728746
		0.701944	0.661475	0.809942	0.201452		0.728149
		0.702636	0.664723	0.807867	0.201177		0.726779
		0.702977	0.678357	0.804377	0.200677		0.725975
		0.70299	0.682825	0.80104	0.200252		0.724014
		0.703318	0.699082	0.800986	0.199681		0.723239
		0.704991	0.70214	0.794811	0.198777		0.720643
		0.705905	0.704105	0.793365	0.198604		0.720347
		0.706709	0.706961	0.787026	0.198449		0.717831
		0.707202	0.723383	0.785744	0.198445		0.714428
		0.707267	0.726162	0.783865	0.197864		0.705836
		0.70854	0.730063	0.780836	0.197408		0.705706
		0.708629	0.733571	0.780257	0.197359		0.704408
		0.708705	0.739088	0.778513	0.197146		0.703384
		0.709281	0.745107	0.777117	0.197067		0.702727
		0.709482	0.745205	0.772204	0.196889		0.702126
		0.710812	0.749453	0.771477	0.196832		0.701592
		0.711616	0.754779	0.769637	0.196197		0.701109
		0.712869	0.755833	0.769221	0.196136		0.692537
		0.712941	0.75611	0.768264	0.195571		0.690239
		0.713136	0.758114	0.768249	0.195237		0.689398
		0.713638	0.758449	0.76409	0.195038		0.688307
		0.713817	0.758542	0.763604	0.194771		0.686914
		0.714071	0.771222	0.762355	0.194125		0.686747
		0.71423	0.774045	0.759952	0.193539		0.685617
		0.714699	0.778736	0.759234	0.187655		0.685512
		0.715331	0.780659	0.758942	0.187293		0.685463
		0.715766	0.782491	0.757667	0.187215		0.68545
		0.715958	0.78278	0.75587	0.187213		0.684268
		0.716977	0.785583	0.753616	0.187075		0.682539
		0.717033	0.78683	0.753077	0.185852		0.681175
		0.71766	0.78819	0.750128	0.185364		0.67816
		0.719026	0.789131	0.748558	0.185145		0.67735
		0.720544	0.791716	0.74599	0.184599		0.6741
		0.721789	0.792327	0.743405	0.184498		0.671803
		0.723106	0.793394	0.743048	0.184488		0.671638
		0.723337	0.797966	0.741137	0.184363		0.670764
		0.723357	0.7989	0.740211	0.184159		0.670395
		0.723772	0.799116	0.739945	0.183409		0.668245
		0.724488	0.801257	0.739055	0.182312		0.668198
		0.725242	0.80269	0.738624	0.181812		0.667149
		0.72536	0.803492	0.737363	0.181279		0.664554
		0.726266	0.803637	0.737128	0.180357		0.663762
		0.727062	0.806235	0.736865	0.180337		0.663757
		0.727552	0.81015	0.731799	0.179171		0.658807
		0.727699	0.814223	0.731648	0.179158		0.658803
		0.727878	0.817786	0.728603	0.178172		0.657013
		0.727896	0.817903	0.72858	0.177775		0.656788
		0.727931	0.818019	0.727392	0.176738		0.655155
		0.728927	0.818571	0.726734	0.176432		0.65133
		0.729687	0.819442	0.726472	0.176089		0.649791
		0.730137	0.821616	0.725303	0.17593		0.648196
		0.730166	0.822072	0.720691	0.175832		0.647177
		0.730207	0.822828	0.720341	0.175775		0.640348
		0.730421	0.823075	0.720097	0.175741		0.639896
		0.730795	0.823079	0.720067	0.175255		0.639835
		0.730849	0.825576	0.718894	0.174342		0.63896
		0.731786	0.82673	0.717003	0.174166		0.637567
		0.73186	0.827637	0.711636	0.173889		0.637502
		0.732587	0.827678	0.711582	0.17339		0.637355
		0.73269	0.829551	0.7106	0.17302		0.635321
		0.732749	0.830672	0.706325	0.17242		0.63055
		0.732849	0.831409	0.704178	0.172149		0.630546
		0.732984	0.831425	0.703652	0.171741		0.624188
		0.733167	0.831788	0.702266	0.171104		0.620499
		0.733372	0.831964	0.701049	0.170431		0.619839
		0.733748	0.832158	0.698602	0.170338		0.609918
		0.733815	0.835138	0.698153	0.170124		0.608042
		0.733882	0.835344	0.695572	0.169074		0.603789
		0.734772	0.835969	0.693825	0.168916		0.603511
		0.734914	0.836719	0.693254	0.168665		0.595513
		0.73496	0.837352	0.692581	0.168569		0.593407
		0.735245	0.837932	0.690999	0.168213		0.590306
		0.735684	0.838001	0.686647	0.168168		0.589277
		0.736611	0.838025	0.685824	0.167867		0.587504
		0.737314	0.841459	0.685199	0.16757		0.583248
		0.737333	0.842435	0.682202	0.167452		0.581627
		0.737537	0.842613	0.681446	0.167141		0.578906
		0.737758	0.842786	0.680074	0.165731		0.573064
		0.738261	0.844084	0.679457	0.165688		0.572312
		0.73875	0.844309	0.677272	0.165048		0.572066
		0.738864	0.844672	0.671965	0.164942		0.568156
		0.738986	0.844999	0.670426	0.164864		0.567773
		0.739188	0.846195	0.669633	0.164004		0.56487
		0.739725	0.846253	0.66842	0.16381		0.560564
		0.739958	0.847298	0.667553	0.16342		0.559694
		0.740128	0.847611	0.664033	0.162805		0.553123
		0.740153	0.848057	0.660579	0.16252		0.552518
		0.74022	0.848404	0.660099	0.161432		0.552493
		0.741545	0.848634	0.659799	0.161075		0.549462
		0.741612	0.84865	0.658484	0.161051		0.548988
		0.742241	0.848741	0.658193	0.160943		0.548871
		0.742307	0.84939	0.655578	0.160864		0.545875
		0.742689	0.849993	0.654484	0.160651		0.544334
		0.743117	0.850618	0.653735	0.160647		0.541352
		0.743168	0.851509	0.650879	0.159965		0.539939
		0.743169	0.851567	0.650452	0.159764		0.539064
		0.743538	0.852115	0.64653	0.159373		0.535924
		0.743932	0.852331	0.64632	0.158551		0.535306
		0.744778	0.852605	0.645264	0.15839		0.530332
		0.744914	0.852607	0.643053	0.157633		0.529796
		0.745397	0.853366	0.64159	0.156909		0.528601
		0.745756	0.853452	0.641216	0.156903		0.527919
		0.746105	0.853538	0.640231	0.156802		0.526265
		0.746251	0.853853	0.638219	0.156409		0.523857
		0.74735	0.854314	0.637729	0.156389		0.519634
		0.747857	0.856448	0.63764	0.156068		0.515109
		0.748135	0.857097	0.637405	0.155623		0.514867
		0.748239	0.857492	0.637054	0.15517		0.511318
		0.749181	0.857727	0.635699	0.154578		0.511085
		0.749293	0.858856	0.634424	0.154433		0.508089
		0.749909	0.859484	0.631573	0.153556		0.506856
		0.749952	0.860445	0.631426	0.153084		0.506672
		0.750106	0.860552	0.631014	0.15305		0.506068
		0.750126	0.860903	0.63045	0.152849		0.50594
		0.750216	0.860974	0.629525	0.152801		0.505073
		0.750569	0.861199	0.628827	0.152769		0.504931
		0.750765	0.861411	0.627738	0.151988		0.503876
		0.751104	0.862845	0.626161	0.151776		0.502356
		0.751273	0.863211	0.625457	0.151472		0.499341
		0.751653	0.86386	0.625282	0.151386		0.497278
		0.751894	0.86395	0.624277	0.151286		0.496741
		0.75194	0.864039	0.624033	0.150917		0.496697
		0.752415	0.864352	0.623439	0.150705		0.494587
		0.752772	0.865392	0.623372	0.150596		0.493661
		0.754232	0.865598	0.6191	0.150537		0.4916
		0.756121	0.866238	0.617745	0.15029		0.490827
		0.756324	0.866907	0.617257	0.150172		0.489355
		0.756938	0.867042	0.615236	0.149709		0.487254
		0.757196	0.867052	0.614998	0.14925		0.481789
		0.758784	0.867344	0.612698	0.149077		0.481136
		0.759759	0.868696	0.609308	0.148991		0.480531
		0.759788	0.870195	0.602956	0.148904		0.480357
		0.759805	0.870449	0.602177	0.14881		0.479642
		0.759945	0.870647	0.600937	0.148776		0.47961
		0.760058	0.870672	0.600804	0.148154		0.471417
		0.760344	0.870911	0.600087	0.148121		0.469765
		0.760473	0.871071	0.599632	0.148044		0.462536
		0.760594	0.871215	0.597232	0.147841		0.461169
		0.760641	0.871352	0.59136	0.147115		0.45949
		0.760794	0.871706	0.586905	0.146873		0.452975
		0.761035	0.871851	0.585825	0.146818		0.451707
		0.761362	0.872547	0.581992	0.146522		0.451706
		0.761491	0.87274	0.581901	0.14647		0.448846
		0.761625	0.87276	0.581078	0.146427		0.442242
		0.76165	0.873253	0.580436	0.146212		0.440581
		0.761759	0.873435	0.580167	0.145592		0.439297
		0.761933	0.874535	0.579753	0.14554		0.437812
		0.762722	0.874882	0.579422	0.145429		0.437778
		0.762888	0.874925	0.578783	0.145241		0.437197
		0.762966	0.87616	0.577166	0.144937		0.437161
		0.763252	0.876214	0.57583	0.144867		0.436551
		0.763552	0.877446	0.57306	0.144813		0.434253
		0.764253	0.877658	0.571586	0.144738		0.43406
		0.764374	0.87852	0.570607	0.144611		0.434032
		0.764612	0.879075	0.570572	0.143917		0.433536
		0.764769	0.879197	0.570247	0.143631		0.433046
		0.764845	0.8792	0.569146	0.143572		0.430999
		0.765131	0.879634	0.568379	0.143162		0.422998
		0.765502	0.879791	0.566698	0.143057		0.421647
		0.766881	0.880017	0.564606	0.143043		0.421033
		0.767331	0.880979	0.564595	0.142945		0.417291
		0.768018	0.881998	0.564168	0.142854		0.413767
		0.768051	0.882457	0.561628	0.142784		0.412895
		0.768346	0.882512	0.561033	0.141655		0.411677
		0.768721	0.88291	0.559286	0.141572		0.40933
		0.768765	0.883863	0.558543	0.141489		0.405455
		0.769047	0.884003	0.558351	0.141466		0.402618
		0.769047	0.884264	0.557444	0.14116		0.4024
		0.769061	0.88472	0.557162	0.140818		0.402181
		0.769282	0.884853	0.556402	0.140716		0.400658
		0.769317	0.885176	0.553861	0.140614		0.400247
		0.769357	0.885348	0.553194	0.140071		0.396969
		0.769573	0.885496	0.553083	0.14001		0.396025
		0.769615	0.885969	0.552709	0.139984		0.394573
		0.769755	0.886718	0.552603	0.139954		0.393805
		0.769802	0.888272	0.551872	0.139927		0.392559
		0.769991	0.888312	0.551289	0.139873		0.390769
		0.770182	0.88882	0.549598	0.139729		0.387907
		0.771332	0.889058	0.548181	0.139708		0.386637
		0.771375	0.889587	0.548071	0.138564		0.385876
		0.771407	0.89017	0.54389	0.13845		0.384578
		0.771632	0.890399	0.541723	0.138431		0.37992
		0.771659	0.890618	0.541133	0.138154		0.379128
		0.7722	0.890948	0.540308	0.138041		0.376664
		0.772214	0.891007	0.539166	0.138004		0.376033
		0.772246	0.892082	0.539096	0.137854		0.375808
		0.772377	0.892115	0.538995	0.137704		0.374248
		0.772558	0.892292	0.537797	0.137461		0.373907
		0.772651	0.892429	0.537144	0.137287		0.373306
		0.772813	0.892699	0.536687	0.136782		0.371944
		0.773032	0.892987	0.534797	0.13651		0.371716
		0.773475	0.893034	0.534373	0.136447		0.371629
		0.773967	0.893084	0.533805	0.135993		0.370779
		0.774103	0.893423	0.533669	0.135637		0.369289
		0.774527	0.893517	0.532884	0.135504		0.367233
		0.774538	0.893657	0.532748	0.135406		0.366963
		0.774709	0.893756	0.532275	0.135399		0.366287
		0.7752	0.893775	0.531646	0.135125		0.366071
		0.775406	0.894571	0.531408	0.134819		0.365604
		0.775675	0.894762	0.530459	0.134706		0.365392
		0.776084	0.8949	0.529485	0.132883		0.364669
		0.776851	0.895085	0.529369	0.132738		0.362728
		0.777028	0.89527	0.52908	0.132629		0.361732
		0.777247	0.895449	0.528717	0.132618		0.361392
		0.777303	0.895698	0.527901	0.132562		0.361259
		0.777708	0.89704	0.527282	0.132481		0.360549
		0.777886	0.897284	0.525222	0.132167		0.36016
		0.778156	0.89731	0.524362	0.132101		0.357635
		0.778414	0.897544	0.524146	0.132016		0.353035
		0.778732	0.897816	0.523027	0.131878		0.351088
		0.778974	0.897848	0.521609	0.131867		0.350335
		0.779096	0.898075	0.518887	0.131778		0.348557
		0.779192	0.898726	0.518593	0.131722		0.345178
		0.779261	0.898759	0.518403	0.131656		0.343811
		0.779312	0.899185	0.514593	0.131304		0.342444
		0.77947	0.899297	0.513047	0.131251		0.342342
		0.78032	0.899467	0.512813	0.131245		0.34219
		0.780768	0.89957	0.512298	0.130866		0.341601
		0.781356	0.899793	0.51019	0.13046		0.340784
		0.781529	0.900159	0.505261	0.130344		0.340404
		0.781575	0.900383	0.504547	0.129728		0.336378
		0.781675	0.900805	0.503525	0.129579		0.335942
		0.781702	0.900849	0.502544	0.129519		0.335631
		0.781884	0.900877	0.498179	0.129369		0.33444
		0.782042	0.901128	0.497652	0.12926		0.334102
		0.782085	0.901175	0.496131	0.129195		0.33369
		0.782156	0.901308	0.495608	0.129083		0.332135
		0.782395	0.901421	0.494925	0.128334		0.331903
		0.7824	0.901975	0.494691	0.128305		0.331137
		0.782418	0.901976	0.493376	0.127289		0.331112
		0.782565	0.902339	0.493133	0.127166		0.330047
		0.782634	0.902586	0.492421	0.126683		0.329816
		0.782832	0.902702	0.490847	0.126488		0.328717
		0.782857	0.902768	0.490502	0.126483		0.327101
		0.782908	0.903507	0.489908	0.126287		0.326733
		0.782965	0.903596	0.487954	0.126133		0.326732
		0.783289	0.903696	0.48778	0.125797		0.326434
		0.783321	0.903884	0.486966	0.125584		0.325449
		0.783341	0.903931	0.486328	0.125381		0.325333
		0.784132	0.904124	0.485688	0.125207		0.325072
		0.784704	0.904319	0.48209	0.12477		0.3246
		0.784731	0.9046	0.47994	0.124693		0.323129
		0.785318	0.904943	0.479844	0.124528		0.323097
		0.785557	0.905078	0.479141	0.124486		0.32282
		0.785695	0.905213	0.478952	0.12437		0.321029
		0.785773	0.905237	0.476797	0.124113		0.319214
		0.785877	0.905691	0.475732	0.123227		0.319141
		0.786192	0.906038	0.475047	0.123214		0.317779
		0.786563	0.906258	0.472786	0.123145		0.315372
		0.786769	0.906494	0.470434	0.123026		0.31488
		0.786961	0.907177	0.470062	0.12293		0.314075
		0.787123	0.907597	0.469827	0.12282		0.310865
		0.787244	0.908224	0.468986	0.122731		0.309945
		0.7878	0.909553	0.465676	0.122019		0.309833
		0.78784	0.909913	0.464944	0.121869		0.309431
		0.788156	0.910365	0.462046	0.121151		0.308726
		0.788215	0.910878	0.460552	0.121092		0.30799
		0.78835	0.911324	0.459929	0.120928		0.307862
		0.788412	0.911367	0.457485	0.120915		0.306656
		0.788425	0.911606	0.45541	0.120777		0.306325
		0.788777	0.911983	0.454217	0.120574		0.30382
		0.788829	0.91209	0.453694	0.120415		0.303566
		0.788909	0.912126	0.4536	0.120334		0.302618
		0.78896	0.912426	0.446418	0.120282		0.301293
		0.790034	0.912688	0.445063	0.120137		0.300088
		0.790062	0.912961	0.443462	0.120126		0.299675
		0.790197	0.913325	0.439469	0.120048		0.297484
		0.790589	0.913759	0.437461	0.119961		0.297029
		0.790907	0.914059	0.437169	0.119794		0.296717
		0.790994	0.914484	0.436728	0.119759		0.293814
		0.791024	0.914513	0.434828	0.119355		0.292691
		0.791416	0.914924	0.43311	0.11917		0.292476
		0.791431	0.915092	0.431452	0.118612		0.292297
		0.791916	0.915151	0.428424	0.11839		0.290861
		0.792065	0.91531	0.428382	0.118308		0.290763
		0.792153	0.915338	0.427842	0.118042		0.289834
		0.792156	0.91535	0.426999	0.117982		0.289721
		0.792279	0.915673	0.426293	0.117795		0.289685
		0.792283	0.915794	0.421353	0.117784		0.288345
		0.792589	0.915943	0.41496	0.117742		0.287217
		0.792665	0.916053	0.414159	0.11698		0.28671
		0.792769	0.916309	0.413496	0.116921		0.286543
		0.792776	0.916504	0.413453	0.116599		0.285001
		0.792842	0.916895	0.409116	0.116522		0.28418
		0.793036	0.916971	0.407954	0.116385		0.283633
		0.793092	0.917255	0.405975	0.116291		0.282958
		0.79329	0.917407	0.405355	0.116217		0.282484
		0.793591	0.917471	0.404973	0.116213		0.28172
		0.793596	0.917523	0.404329	0.115837		0.280428
		0.7939	0.917797	0.404187	0.115479		0.280235
		0.794069	0.918426	0.402687	0.115312		0.279339
		0.794084	0.918427	0.402632	0.115244		0.279175
		0.794121	0.918479	0.401125	0.115159		0.278409
		0.794219	0.918494	0.398569	0.115154		0.275294
		0.794712	0.918554	0.398564	0.114795		0.275179
		0.794736	0.918818	0.398401	0.11441		0.274637
		0.794928	0.919377	0.397764	0.114379		0.274226
		0.79506	0.91952	0.397666	0.114347		0.274032
		0.795586	0.920051	0.397562	0.114285		0.273829
		0.79612	0.920268	0.396404	0.114143		0.272996
		0.796264	0.920269	0.394551	0.114083		0.272945
		0.796544	0.92027	0.393807	0.113731		0.271616
		0.796601	0.920517	0.393218	0.113533		0.271434
		0.796639	0.920612	0.392394	0.113435		0.270682
		0.796646	0.920718	0.392326	0.113359		0.270156
		0.796747	0.921534	0.390715	0.113047		0.27014
		0.797279	0.921848	0.389473	0.112931		0.269257
		0.797288	0.922012	0.389059	0.112866		0.267781
		0.797672	0.92212	0.388423	0.112182		0.267737
		0.797809	0.922127	0.388181	0.112166		0.26697
		0.797845	0.922199	0.3827	0.111948		0.266805
		0.79814	0.922622	0.380492	0.111947		0.266774
		0.798238	0.922636	0.378576	0.111886		0.266506
		0.798414	0.922654	0.376595	0.111877		0.266485
		0.798676	0.922785	0.37293	0.111494		0.265987
		0.798791	0.922799	0.372474	0.111397		0.265944
		0.798852	0.922937	0.370092	0.111137		0.265673
		0.798896	0.923194	0.369217	0.110454		0.26564
		0.798923	0.923316	0.368404	0.11044		0.265221
		0.798937	0.923598	0.364335	0.110365		0.265035
		0.799231	0.923836	0.364262	0.11032		0.264432
		0.799504	0.923917	0.363374	0.110263		0.264408
		0.799703	0.924113	0.362924	0.110185		0.264179
		0.799794	0.924265	0.362435	0.110028		0.263141
		0.800097	0.924419	0.361691	0.109831		0.26228
		0.800652	0.9249	0.361536	0.109681		0.262215
		0.801181	0.925752	0.361176	0.109643		0.26186
		0.801277	0.925843	0.360082	0.109425		0.261529
		0.801288	0.92594	0.357978	0.109361		0.261057
		0.801434	0.92638	0.355671	0.109014		0.260123
		0.801456	0.926535	0.35517	0.108706		0.259545
		0.801788	0.926732	0.354831	0.108577		0.259093
		0.801831	0.927142	0.352095	0.108442		0.25836
		0.802145	0.92752	0.351466	0.108386		0.25798
		0.802169	0.927759	0.351101	0.108382		0.255044
		0.802578	0.927837	0.350998	0.1083		0.254457
		0.80267	0.927879	0.350616	0.107932		0.253974
		0.802687	0.927996	0.350022	0.107833		0.253888
		0.802969	0.928293	0.348902	0.10771		0.253459
		0.803752	0.928621	0.347981	0.1072		0.25325
		0.803837	0.928654	0.346172	0.106943		0.252954
		0.803886	0.928679	0.345734	0.10679		0.251834
		0.80463	0.928758	0.345111	0.106696		0.251713
		0.804757	0.928852	0.344041	0.106399		0.250842
		0.805085	0.928906	0.338621	0.10631		0.250629
		0.805153	0.928956	0.338099	0.106278		0.250386
		0.805783	0.929009	0.337968	0.106276		0.250086
		0.806455	0.929305	0.336634	0.105955		0.249384
		0.806501	0.929468	0.336377	0.105103		0.249089
		0.806635	0.929474	0.335209	0.105103		0.249045
		0.806651	0.929475	0.332236	0.104895		0.248095
		0.806688	0.929502	0.331704	0.104769		0.247909
		0.806732	0.929562	0.330747	0.104581		0.247733
		0.807118	0.929766	0.330461	0.104401		0.247697
		0.807364	0.929796	0.33018	0.104046		0.247106
		0.807436	0.929808	0.329445	0.103606		0.246448
		0.807733	0.929967	0.328739	0.103524		0.244937
		0.808049	0.930145	0.327988	0.103501		0.244597
		0.808375	0.93043	0.32793	0.103459		0.243241
		0.808386	0.930541	0.324713	0.103382		0.242666
		0.808416	0.930669	0.323116	0.102769		0.242315
		0.808432	0.931126	0.320607	0.102738		0.241946
		0.808606	0.931339	0.32039	0.102495		0.241579
		0.808837	0.931442	0.320207	0.102402		0.2415
		0.809165	0.931709	0.320024	0.102369		0.241428
		0.809586	0.931762	0.319507	0.102351		0.241223
		0.809642	0.93199	0.319429	0.102302		0.241087
		0.809671	0.932019	0.318838	0.102226		0.240994
		0.809819	0.932142	0.318822	0.102196		0.24025
		0.810289	0.932239	0.314427	0.10216		0.239304
		0.810399	0.932242	0.313832	0.101863		0.239092
		0.810509	0.932269	0.312785	0.101863		0.23881
		0.810588	0.932848	0.312205	0.101827		0.237642
		0.810648	0.933122	0.310218	0.101551		0.237288
		0.810716	0.933201	0.309432	0.101288		0.23699
		0.810825	0.933353	0.308165	0.101136		0.236817
		0.811163	0.933692	0.306408	0.101083		0.236805
		0.811414	0.934143	0.305512	0.100807		0.236449
		0.811627	0.934212	0.304992	0.100589		0.235869
		0.811814	0.934269	0.304012	0.100219		0.235597
		0.812092	0.934449	0.30331	0.100195		0.235461
		0.812413	0.935066	0.301429	0.0999453		0.234466
		0.812417	0.935263	0.300877	0.0997859		0.234457
		0.813056	0.93582	0.300692	0.0997395		0.234123
		0.813238	0.935853	0.299046	0.0996723		0.233909
		0.813274	0.935955	0.297453	0.0996538		0.233543
		0.813357	0.936026	0.296012	0.0990823		0.233396
		0.813413	0.936225	0.295975	0.0988488		0.233255
		0.813622	0.936482	0.294598	0.0988442		0.233036
		0.814037	0.936637	0.29386	0.0984093		0.232608
		0.814168	0.936781	0.29372	0.0983833		0.232513
		0.814187	0.936803	0.29369	0.0983683		0.232395
		0.814379	0.937191	0.293415	0.0981641		0.232149
		0.81465	0.937223	0.293154	0.0978809		0.232036
		0.814682	0.937613	0.292954	0.0978419		0.230954
		0.81487	0.937745	0.292738	0.0974126		0.230245
		0.815314	0.937862	0.291207	0.0973063		0.230207
		0.815509	0.938057	0.290691	0.0972293		0.229851
		0.815537	0.93813	0.290431	0.0970255		0.228896
		0.81569	0.938198	0.287501	0.0969787		0.228795
		0.816139	0.938266	0.285758	0.0967304		0.228626
		0.816225	0.938315	0.285303	0.0964648		0.228379
		0.816279	0.938333	0.284752	0.0964035		0.227481
		0.81629	0.938391	0.284279	0.0963441		0.2273
		0.816388	0.938524	0.282823	0.0962315		0.227218
		0.816421	0.938599	0.282698	0.0962298		0.227002
		0.816687	0.938651	0.281751	0.0961978		0.226336
		0.816943	0.939119	0.280685	0.0958534		0.226122
		0.817007	0.939503	0.280064	0.0954652		0.22589
		0.817161	0.939768	0.279658	0.0954571		0.225432
		0.81733	0.939794	0.279008	0.0952935		0.225359
		0.817547	0.939819	0.278691	0.095257		0.225101
		0.817673	0.940373	0.277891	0.0949843		0.225077
		0.817852	0.940389	0.276746	0.0949711		0.224822
		0.817853	0.940436	0.275638	0.0942996		0.2247
		0.817941	0.940796	0.275539	0.0938657		0.224215
		0.818261	0.941087	0.274958	0.0937163		0.224169
		0.818305	0.94131	0.274789	0.0937144		0.223843
		0.818331	0.94187	0.274391	0.0934757		0.223515
		0.818606	0.941924	0.272502	0.0934105		0.223484
		0.818659	0.942056	0.268786	0.093215		0.223373
		0.81893	0.942472	0.268578	0.093055		0.222676
		0.819394	0.942497	0.26838	0.0927089		0.222199
		0.819423	0.942529	0.268282	0.0925425		0.221945
		0.819513	0.942893	0.26827	0.0925333		0.221729
		0.819537	0.943637	0.268166	0.0922868		0.221386
		0.81958	0.943642	0.266986	0.0922793		0.219711
		0.819705	0.943897	0.266072	0.0922343		0.218678
		0.819968	0.943942	0.264058	0.0920589		0.21863
		0.819975	0.944082	0.263871	0.0919071		0.218432
		0.820154	0.944102	0.262157	0.0918624		0.218341
		0.820159	0.944146	0.261345	0.0916802		0.217973
		0.820392	0.944299	0.260356	0.0916503		0.217725
		0.820488	0.944505	0.257818	0.0912538		0.217676
		0.820546	0.944959	0.257568	0.0911766		0.217659
		0.820549	0.945077	0.257536	0.0910014		0.217323
		0.82061	0.945191	0.257308	0.0909471		0.217175
		0.820642	0.945193	0.257218	0.0908323		0.216803
		0.820677	0.945278	0.256588	0.0903649		0.216452
		0.82071	0.945329	0.255976	0.0903472		0.215138
		0.820836	0.945474	0.255902	0.0901262		0.214786
		0.820931	0.945593	0.253305	0.0898482		0.214513
		0.821008	0.94656	0.252652	0.0896798		0.214243
		0.821112	0.947037	0.252085	0.089673		0.213809
		0.821418	0.947173	0.251711	0.0895497		0.213207
		0.821427	0.947228	0.251218	0.0894593		0.213199
		0.821754	0.94725	0.251074	0.0890843		0.213119
		0.821945	0.947443	0.250469	0.0886395		0.212847
		0.821986	0.947587	0.250128	0.088619		0.212566
		0.822217	0.947671	0.249463	0.0885526		0.212371
		0.822507	0.947779	0.249328	0.0884155		0.212065
		0.822558	0.947945	0.248615	0.0883532		0.211958
		0.822702	0.94796	0.248329	0.0883106		0.211877
		0.822996	0.948082	0.247033	0.0882972		0.211795
		0.823442	0.948527	0.246968	0.0880647		0.211603
		0.823654	0.948617	0.246171	0.0879005		0.210893
		0.823723	0.948739	0.246027	0.0878918		0.210551
		0.823765	0.948743	0.245637	0.0878547		0.210109
		0.823797	0.949033	0.245545	0.0876775		0.209888
		0.824106	0.949083	0.245327	0.087419		0.209862
		0.824178	0.949101	0.24495	0.0873322		0.209722
		0.824182	0.949165	0.243651	0.0872668		0.209448
		0.824319	0.949418	0.243018	0.0872659		0.209418
		0.824639	0.949443	0.242217	0.0871917		0.209366
		0.824684	0.949475	0.241215	0.0870701		0.208386
		0.824749	0.94967	0.240535	0.0870334		0.208306
		0.824755	0.9499	0.238264	0.0869752		0.207822
		0.824849	0.949906	0.237051	0.0855244		0.207164
		0.824992	0.94998	0.236947	0.0855095		0.207069
		0.825086	0.95002	0.236603	0.0854183		0.20635
		0.825114	0.95006	0.236433	0.085267		0.204374
		0.825182	0.950098	0.236059	0.0851251		0.203781
		0.825214	0.950126	0.235558	0.0849754		0.202899
		0.825249	0.950161	0.235457	0.0846564		0.201849
		0.825274	0.95017	0.234337	0.0844085		0.201652
		0.82555	0.95043	0.234321	0.0843649		0.201451
		0.825623	0.950448	0.234045	0.0842451		0.201331
		0.825708	0.950462	0.233382	0.0841299		0.200817
		0.825968	0.950761	0.233297	0.0841116		0.200812
		0.826058	0.950864	0.2332	0.0840727		0.20058
		0.826082	0.951199	0.232498	0.0840566		0.20048
		0.826142	0.95147	0.232451	0.0836485		0.199761
		0.82643	0.951747	0.232447	0.0835263		0.19886
		0.82646	0.951766	0.232194	0.0834879		0.198712
		0.82666	0.951768	0.230598	0.0833407		0.198462
		0.826676	0.95185	0.229975	0.0833096		0.197668
		0.826771	0.951909	0.22854	0.0832947		0.19697
		0.826896	0.951964	0.228512	0.0831868		0.196661
		0.826901	0.951982	0.228491	0.0831519		0.196484
		0.827145	0.952016	0.228136	0.0828475		0.195637
		0.827351	0.952201	0.227915	0.0827912		0.195568
		0.827426	0.952237	0.226937	0.0825204		0.195343
		0.827504	0.952259	0.226397	0.082398		0.195317
		0.827526	0.952309	0.225793	0.0823414		0.195301
		0.82758	0.952878	0.22552	0.0822477		0.194621
		0.82762	0.95333	0.224376	0.0818017		0.194126
		0.827661	0.953466	0.223326	0.0815943		0.193797
		0.827779	0.953502	0.223132	0.0815694		0.193596
		0.827897	0.953614	0.222868	0.0814672		0.193157
		0.82816	0.954413	0.222623	0.0812514		0.192594
		0.828458	0.954419	0.221528	0.0811877		0.192177
		0.828491	0.954727	0.220948	0.0810893		0.192063
		0.828504	0.95474	0.220825	0.0810741		0.192017
		0.828525	0.954933	0.220448	0.0809711		0.191072
		0.828662	0.954961	0.220335	0.0808267		0.191048
		0.82883	0.954964	0.220181	0.0807243		0.190686
		0.828847	0.955567	0.219949	0.0806799		0.190651
		0.82885	0.955595	0.219444	0.0805099		0.190325
		0.828887	0.955976	0.218945	0.0803301		0.19019
		0.828945	0.956067	0.21729	0.080259		0.190141
		0.829191	0.956167	0.217191	0.080184		0.189982
		0.829484	0.956816	0.217077	0.0799562		0.189972
		0.829522	0.95692	0.215984	0.0798937		0.189056
		0.829655	0.956956	0.215003	0.0798257		0.188787
		0.829901	0.957111	0.213847	0.0793706		0.188757
		0.830228	0.957147	0.213653	0.0793229		0.188593
		0.830243	0.957205	0.212504	0.0789657		0.187988
		0.830257	0.957272	0.211831	0.0786192		0.186915
		0.830287	0.957341	0.211732	0.0786077		0.185971
		0.830389	0.957383	0.210965	0.078543		0.18579
		0.830682	0.957964	0.210317	0.0783414		0.185738
		0.830687	0.958166	0.210288	0.0783141		0.185627
		0.830778	0.958375	0.210197	0.0781356		0.185451
		0.830778	0.958771	0.208052	0.0781119		0.185203
		0.831248	0.958823	0.207683	0.0779253		0.184612
		0.831434	0.959039	0.207269	0.077883		0.18447
		0.831701	0.959175	0.206476	0.0778811		0.183936
		0.831788	0.959231	0.205888	0.0778507		0.183896
		0.831835	0.959936	0.204906	0.0777655		0.183863
		0.831905	0.959984	0.204705	0.0775389		0.183774
		0.831915	0.960207	0.204528	0.0772158		0.183579
		0.832043	0.960256	0.204438	0.0769812		0.183065
		0.832088	0.960575	0.204396	0.0769284		0.182453
		0.832215	0.960859	0.204242	0.076885		0.182443
		0.832247	0.961114	0.204204	0.0766403		0.182349
		0.832521	0.961169	0.204111	0.0764117		0.182267
		0.832542	0.961472	0.204098	0.0763213		0.181852
		0.832927	0.961679	0.203626	0.0762499		0.181839
		0.832971	0.96172	0.203355	0.0760573		0.181692
		0.833028	0.961946	0.20318	0.0759815		0.180957
		0.833047	0.962111	0.202207	0.0758855		0.180855
		0.833064	0.962936	0.202005	0.0758746		0.180216
		0.833159	0.963556	0.201879	0.0757027		0.180025
		0.833172	0.9639	0.201216	0.0752061		0.180001
		0.833803	0.963944	0.20111	0.0751428		0.179879
		0.833926	0.964044	0.20092	0.0750665		0.179701
		0.833987	0.964373	0.199805	0.0749661		0.179189
		0.834292	0.964579	0.199348	0.0747284		0.178661
		0.834581	0.964841	0.198776	0.0745868		0.178639
		0.834734	0.964884	0.198729	0.0745772		0.177842
		0.835238	0.964901	0.198702	0.0744545		0.177767
		0.835285	0.964937	0.198312	0.0744528		0.177184
		0.835449	0.965025	0.198131	0.0743397		0.177018
		0.835878	0.965175	0.198056	0.0741056		0.176732
		0.836062	0.965221	0.197777	0.074078		0.176159
		0.836095	0.965437	0.197014	0.0740003		0.174808
		0.836149	0.965598	0.196246	0.0739958		0.174685
		0.836322	0.965659	0.195538	0.0739186		0.174635
		0.836328	0.965937	0.195466	0.073461		0.174573
		0.83646	0.96641	0.19487	0.0732059		0.173722
		0.836797	0.966439	0.194257	0.0730882		0.173283
		0.836841	0.966672	0.194205	0.0730877		0.172835
		0.83688	0.966678	0.193523	0.0727062		0.172831
		0.837089	0.966721	0.193274	0.0726837		0.172729
		0.837226	0.967183	0.192598	0.0724895		0.172564
		0.8374	0.96738	0.192572	0.0724505		0.17232
		0.837424	0.967598	0.192272	0.0722852		0.172284
		0.83744	0.967711	0.191703	0.0722814		0.172142
		0.83755	0.967778	0.191151	0.0722118		0.171965
		0.83756	0.968267	0.190883	0.0721631		0.171654
		0.837734	0.968268	0.190829	0.0720331		0.171599
		0.837772	0.968392	0.190458	0.0720069		0.171003
		0.837865	0.968397	0.190037	0.0719757		0.170766
		0.837921	0.968767	0.189677	0.0719263		0.170594
		0.837957	0.968873	0.189437	0.0711055		0.169959
		0.837979	0.96928	0.189154	0.0710922		0.169839
		0.838064	0.969839	0.18908	0.0710824		0.169625
		0.838174	0.970117	0.187971	0.0709573		0.169606
		0.838216	0.970722	0.187794	0.0708481		0.16952
		0.838232	0.970797	0.187171	0.0706574		0.169245
		0.838321	0.971098	0.186807	0.0705943		0.169054
		0.838328	0.971262	0.185421	0.0703482		0.169006
		0.838426	0.971517	0.185297	0.0701163		0.168939
		0.838428	0.971533	0.184036	0.0701123		0.168324
		0.838528	0.971959	0.183927	0.0700163		0.168303
		0.838582	0.972006	0.183146	0.0699514		0.167963
		0.838782	0.972383	0.181974	0.0698857		0.167931
		0.8388	0.972533	0.180902	0.0697279		0.167786
		0.838818	0.972595	0.180773	0.0696392		0.167761
		0.838861	0.972958	0.180151	0.0694881		0.167462
		0.838946	0.973092	0.18015	0.0694286		0.167103
		0.838991	0.973098	0.179934	0.0694228		0.166805
		0.839097	0.973144	0.179468	0.0693412		0.166313
		0.83915	0.973352	0.179459	0.0690438		0.165316
		0.839168	0.973584	0.179091	0.0689686		0.165043
		0.839204	0.973626	0.17844	0.0688282		0.164815
		0.839872	0.973724	0.178397	0.06865		0.164587
		0.839884	0.973844	0.177887	0.0686202		0.164063
		0.839925	0.97387	0.177703	0.0686202		0.164052
		0.839992	0.973874	0.177574	0.068571		0.164024
		0.840075	0.9739	0.177509	0.0684791		0.163846
		0.840231	0.973932	0.176954	0.0684763		0.16323
		0.840285	0.974009	0.176953	0.068462		0.162912
		0.840417	0.974345	0.175876	0.0683929		0.162782
		0.840545	0.974398	0.175765	0.0683238		0.162722
		0.840592	0.974544	0.175026	0.0682425		0.162229
		0.840631	0.974669	0.174812	0.068119		0.162155
		0.840666	0.974916	0.174268	0.0678186		0.162067
		0.840702	0.975161	0.17323	0.0675522		0.161632
		0.840751	0.975325	0.173022	0.0675413		0.160965
		0.840803	0.975383	0.172875	0.067476		0.160857
		0.84095	0.97541	0.172398	0.067387		0.160695
		0.841137	0.975507	0.171896	0.0673068		0.160498
		0.84116	0.975706	0.17145	0.0671433		0.159439
		0.841249	0.976147	0.171363	0.0671433		0.159039
		0.841284	0.976525	0.171256	0.067082		0.159019
		0.841508	0.976911	0.170337	0.0670164		0.158829
		0.841515	0.977342	0.169179	0.0668598		0.158812
		0.841616	0.977499	0.168431	0.0667791		0.158747
		0.841751	0.977697	0.167668	0.0667697		0.158738
		0.841864	0.977992	0.167667	0.0667557		0.158538
		0.841883	0.978075	0.167171	0.0667238		0.158489
		0.841965	0.978232	0.166982	0.0666832		0.158194
		0.842123	0.978259	0.165956	0.0666709		0.157393
		0.8424	0.978365	0.165944	0.0666429		0.157145
		0.842511	0.978376	0.165915	0.0666107		0.156992
		0.842519	0.978599	0.16571	0.066306		0.156949
		0.84255	0.97861	0.165481	0.0661303		0.156246
		0.842702	0.979012	0.165027	0.0659946		0.15617
		0.842819	0.979522	0.164931	0.0659781		0.155907
		0.842841	0.979603	0.164901	0.0658543		0.15588
		0.843009	0.979614	0.164733	0.065795		0.155784
		0.843176	0.97969	0.164179	0.0657815		0.155738
		0.843232	0.979817	0.163506	0.0656797		0.15563
		0.843235	0.980116	0.163457	0.0655704		0.155427
		0.843652	0.980257	0.163438	0.0653597		0.155302
		0.843832	0.98031	0.163	0.0653313		0.15478
		0.843836	0.980391	0.162049	0.0651942		0.154718
		0.844498	0.980494	0.161056	0.0651018		0.154642
		0.845163	0.980586	0.160815	0.0650812		0.15437
		0.845294	0.980604	0.160575	0.0649223		0.154328
		0.845524	0.981324	0.160566	0.0648878		0.154122
		0.845696	0.98182	0.160293	0.0647519		0.15374
		0.84577	0.981927	0.159878	0.0645727		0.153371
		0.845892	0.982115	0.159488	0.0645352		0.153369
		0.846019	0.982958	0.158173	0.0645292		0.152935
		0.846214	0.983164	0.15766	0.0644383		0.152912
		0.846456	0.983286	0.157517	0.0644169		0.152478
		0.84652	0.983899	0.157269	0.0643709		0.152429
		0.846564	0.983996	0.156949	0.0642395		0.152227
		0.84675	0.984045	0.156803	0.0638467		0.15172
		0.8468	0.984066	0.156601	0.063791		0.151481
		0.846843	0.98429	0.156201	0.0637141		0.151355
		0.84689	0.984689	0.156072	0.0636718		0.151022
		0.84723	0.984829	0.155378	0.0636176		0.150828
		0.847322	0.985033	0.154882	0.0635892		0.150658
		0.847431	0.98527	0.154462	0.0634734		0.150635
		0.847439	0.985384	0.154075	0.0634268		0.150573
		0.847503	0.985458	0.153924	0.0633268		0.150504
		0.84754	0.985788	0.153883	0.0632269		0.150434
		0.847548	0.985805	0.153831	0.063168		0.150362
		0.847602	0.985811	0.153617	0.0631516		0.150328
		0.84773	0.985893	0.15193	0.0631251		0.14974
		0.848018	0.986061	0.151726	0.0630192		0.149417
		0.848029	0.986219	0.1514	0.0630122		0.14932
		0.848107	0.986356	0.151345	0.0628854		0.149265
		0.84841	0.986497	0.15089	0.0622397		0.149111
		0.848537	0.986567	0.150752	0.062048		0.148034
		0.848545	0.986728	0.149239	0.062038		0.148
		0.848741	0.98697	0.149054	0.0620304		0.14788
		0.848747	0.987512	0.148732	0.0617177		0.147727
		0.848768	0.987679	0.148697	0.0617037		0.147718
		0.848794	0.987734	0.148194	0.0613721		0.147575
		0.848957	0.987804	0.148161	0.0612901		0.147244
		0.849006	0.987866	0.148053	0.0611868		0.146891
		0.849011	0.98793	0.146972	0.0609387		0.146793
		0.849045	0.988103	0.146969	0.0601909		0.146756
		0.849241	0.988206	0.146902	0.0601475		0.146735
		0.849261	0.988514	0.146834	0.0598489		0.146497
		0.84954	0.989361	0.146449	0.0597329		0.146475
		0.849959	0.989445	0.145703	0.059311		0.146428
		0.849981	0.989506	0.145657	0.0592303		0.146193
		0.850063	0.989615	0.145619	0.0590948		0.14604
		0.85008	0.989929	0.145297	0.0590011		0.145883
		0.850186	0.9901	0.145074	0.058909		0.145792
		0.850196	0.99021	0.144524	0.0588604		0.145756
		0.850309	0.99052	0.144258	0.0588094		0.145352
		0.850317	0.990574	0.143547	0.0586096		0.144901
		0.850488	0.990654	0.142475	0.0585879		0.144653
		0.850499	0.990702	0.141836	0.0585518		0.144133
		0.850561	0.990713	0.141303	0.0584791		0.143874
		0.850763	0.990854	0.141184	0.0582544		0.143692
		0.850768	0.991152	0.141048	0.058144		0.143615
		0.851137	0.991161	0.140876	0.0580915		0.143545
		0.851538	0.991187	0.140559	0.0576712		0.143297
		0.851569	0.991218	0.139899	0.057268		0.143059
		0.851683	0.991511	0.139759	0.057267		0.142386
		0.851931	0.991538	0.139629	0.0571501		0.142342
		0.851979	0.992115	0.13957	0.0569581		0.142305
		0.85204	0.992237	0.139246	0.0568894		0.142216
		0.852098	0.992356	0.139082	0.0566408		0.142014
		0.852259	0.992426	0.13826	0.0563213		0.14136
		0.85229	0.99263	0.138244	0.0559228		0.141221
		0.852531	0.992664	0.1377	0.0557833		0.140484
		0.85256	0.992827	0.137358	0.0555531		0.140332
		0.852617	0.993082	0.137197	0.0555426		0.140107
		0.852938	0.993218	0.13674	0.0555246		0.139919
		0.853333	0.993258	0.13627	0.0552619		0.139601
		0.853336	0.993473	0.136126	0.0551327		0.139549
		0.853391	0.993507	0.135998	0.0546626		0.139448
		0.853399	0.994143	0.135614	0.0546614		0.139432
		0.853476	0.994763	0.135521	0.0544384		0.139364
		0.853486	0.995844	0.135509	0.0544276		0.139214
		0.85354	0.99607	0.134879	0.0543576		0.139203
		0.853555	0.996143	0.133765	0.0542771		0.139107
		0.853559	0.996249	0.133568	0.0541484		0.138935
		0.853589	0.99625	0.133273	0.0541177		0.13871
		0.853776	0.996372	0.132783	0.0540191		0.138693
		0.853785	0.996429	0.13276	0.0539012		0.138503
		0.854075	0.996539	0.132697	0.0538482		0.13847
		0.854149	0.996617	0.131821	0.0537185		0.138358
		0.854149	0.996673	0.131655	0.0535913		0.137286
		0.854177	0.996892	0.131602	0.0535613		0.137206
		0.854194	0.99695	0.131561	0.0534534		0.137174
		0.854311	0.997251	0.131306	0.0533999		0.136856
		0.85437	0.997329	0.131111	0.0533935		0.136776
		0.854386	0.997357	0.130949	0.0533899		0.136722
		0.854497	0.997486	0.130826	0.0532787		0.136648
		0.854501	0.997712	0.130767	0.0532108		0.136268
		0.854523	0.997856	0.130505	0.0531561		0.136127
		0.854543	0.998346	0.130163	0.0531327		0.135494
		0.854683	0.998531	0.129924	0.0530642		0.135411
		0.854694	0.998654	0.129585	0.0530158		0.135114
		0.854812	0.99866	0.128667	0.052844		0.134907
		0.854921	0.99878	0.128195	0.0528011		0.134766
		0.854972	0.999018	0.128089	0.0528		0.134518
		0.854973	0.999038	0.127968	0.0526704		0.134515
		0.855045	0.999048	0.127698	0.0526331		0.134306
		0.855146	0.999143	0.127145	0.052473		0.134252
		0.855252	0.999317	0.127062	0.0522008		0.134156
		0.855375	0.999464	0.126905	0.0519076		0.134034
		0.855473	0.999786	0.126903	0.0518648		0.134011
		0.855481	0.999793	0.126608	0.0518468		0.13401
		0.855486	0.999926	0.12629	0.0515878		0.133246
		0.855524	1	0.126279	0.0514313		0.132839
		0.85569	1.00024	0.125969	0.0513745		0.132757
		0.855744	1.00035	0.125708	0.0513507		0.132647
		0.855771	1.00054	0.125396	0.0513207		0.132455
		0.855786	1.00069	0.12516	0.051278		0.132383
		0.855925	1.00078	0.124996	0.0512318		0.132383
		0.855977	1.00086	0.124855	0.0511986		0.13206
		0.856002	1.0013	0.124519	0.0510702		0.131253
		0.856033	1.00131	0.124286	0.0508391		0.131106
		0.856091	1.00146	0.124089	0.0508291		0.131019
		0.856233	1.00156	0.123707	0.0507438		0.130549
		0.856413	1.00167	0.123591	0.0506028		0.130375
		0.856471	1.00188	0.123473	0.0505567		0.130301
		0.856495	1.00238	0.123357	0.0504259		0.130159
		0.856696	1.00251	0.123351	0.0502577		0.129907
		0.856722	1.00267	0.1232	0.0498417		0.129773
		0.85677	1.00294	0.123128	0.0496454		0.129492
		0.856831	1.00304	0.123026	0.0494837		0.129464
		0.856834	1.0031	0.122573	0.049461		0.12919
		0.85689	1.00363	0.122373	0.04946		0.12919
		0.856914	1.0037	0.122283	0.0493994		0.128916
		0.857182	1.00377	0.122065	0.0492756		0.128828
		0.857309	1.00392	0.121545	0.049269		0.128633
		0.857354	1.00395	0.12134	0.0492119		0.128305
		0.857362	1.00425	0.120012	0.0485926		0.128293
		0.85739	1.0045	0.119992	0.0484666		0.128239
		0.85739	1.0048	0.119774	0.0481923		0.128238
		0.85739	1.00503	0.119192	0.0481527		0.127907
		0.857431	1.00527	0.118811	0.0479377		0.127431
		0.857435	1.00531	0.118188	0.0478692		0.127206
		0.857507	1.00549	0.117874	0.0477685		0.127115
		0.857622	1.00554	0.117644	0.0477291		0.127087
		0.857648	1.00577	0.117482	0.0475844		0.127061
		0.857684	1.00578	0.117265	0.0473431		0.127045
		0.858235	1.00621	0.116245	0.0473383		0.127005
		0.858236	1.0067	0.115967	0.0473207		0.126477
		0.858239	1.007	0.1156	0.0471365		0.126369
		0.858281	1.0071	0.115539	0.0471033		0.126363
		0.858461	1.00721	0.115489	0.0469842		0.125442
		0.858493	1.0074	0.115238	0.0468248		0.125278
		0.858551	1.00751	0.114857	0.0468064		0.124879
		0.858641	1.0078	0.114804	0.0463481		0.124847
		0.858646	1.00797	0.114788	0.0461441		0.124791
		0.858718	1.00804	0.114722	0.0460971		0.124778
		0.858858	1.00837	0.11459	0.0460484		0.124628
		0.858899	1.00865	0.114444	0.0460388		0.124594
		0.858992	1.00868	0.114171	0.0459413		0.124533
		0.859091	1.00872	0.113585	0.0459088		0.124191
		0.859504	1.00911	0.113526	0.0458541		0.123811
		0.859705	1.00975	0.113493	0.0458088		0.123672
		0.859757	1.00981	0.11344	0.0457842		0.123493
		0.859763	1.01015	0.11338	0.0457616		0.123173
		0.859766	1.01017	0.113292	0.045533		0.123146
		0.859845	1.01043	0.113187	0.0454057		0.12292
		0.859972	1.01061	0.112933	0.0453936		0.122826
		0.860038	1.01069	0.112925	0.0452794		0.122687
		0.860099	1.01104	0.112794	0.0452227		0.122684
		0.860589	1.01125	0.112307	0.0451826		0.122574
		0.860637	1.01134	0.111976	0.0451495		0.122337
		0.86083	1.01183	0.111251	0.0450807		0.122089
		0.860903	1.01205	0.111062	0.0448579		0.121923
		0.861059	1.01259	0.110995	0.0447803		0.121632
		0.861116	1.01275	0.110265	0.0445709		0.121612
		0.861319	1.01276	0.10997	0.0444694		0.121112
		0.861469	1.01279	0.109824	0.0444223		0.120952
		0.861685	1.01321	0.10962	0.0442966		0.120353
		0.861719	1.01325	0.10926	0.0442028		0.120308
		0.861727	1.01361	0.109225	0.0440607		0.11994
		0.861864	1.01365	0.108815	0.043826		0.119877
		0.86199	1.0138	0.108721	0.043802		0.119597
		0.862124	1.01437	0.107893	0.0437673		0.119507
		0.862138	1.01458	0.107675	0.0436915		0.119319
		0.862152	1.01463	0.107648	0.0435887		0.119219
		0.862349	1.01468	0.106855	0.0434193		0.11896
		0.862499	1.01471	0.106718	0.0433628		0.11891
		0.862544	1.01479	0.106392	0.04323		0.118813
		0.862659	1.0148	0.106334	0.0432049		0.118391
		0.86283	1.01492	0.105955	0.0431403		0.118313
		0.862868	1.01516	0.105927	0.043102		0.118287
		0.863031	1.01517	0.105809	0.0430279		0.118008
		0.863053	1.01569	0.105709	0.0429374		0.117862
		0.863107	1.01631	0.105692	0.0427146		0.117803
		0.863271	1.01654	0.105527	0.0422678		0.117752
		0.8633	1.01683	0.105382	0.0420584		0.117737
		0.86342	1.01731	0.105121	0.0418139		0.117637
		0.863507	1.01742	0.104932	0.0415222		0.117575
		0.863538	1.01749	0.104624	0.0415018		0.11756
		0.863668	1.01774	0.104055	0.0413354		0.117186
		0.863771	1.01781	0.103733	0.0413148		0.11707
		0.863787	1.01821	0.103625	0.0411293		0.116609
		0.863902	1.01825	0.10361	0.0408803		0.116532
		0.86396	1.01827	0.102794	0.0408275		0.115751
		0.864065	1.01829	0.10275	0.0407239		0.115638
		0.864075	1.01832	0.102371	0.0406656		0.115456
		0.864136	1.01836	0.101556	0.0405144		0.115176
		0.864224	1.01895	0.101441	0.0404816		0.114902
		0.86425	1.01968	0.10132	0.0404737		0.114598
		0.864304	1.01999	0.101229	0.0404532		0.114569
		0.864441	1.02013	0.100647	0.0404345		0.114452
		0.864443	1.02042	0.100322	0.0403643		0.114134
		0.864575	1.02057	0.100143	0.0402161		0.113763
		0.864648	1.02141	0.0991541	0.0401565		0.113189
		0.864681	1.02194	0.0988962	0.040018		0.113184
		0.864725	1.0221	0.0988645	0.0396257		0.113159
		0.864913	1.02217	0.0986874	0.0394307		0.113049
		0.864957	1.02219	0.0985533	0.0393971		0.112946
		0.86506	1.02253	0.0985227	0.0392999		0.112514
		0.865124	1.02257	0.0985121	0.0392791		0.111847
		0.865264	1.02274	0.098062	0.0392501		0.111837
		0.865276	1.02281	0.0978276	0.0391406		0.111759
		0.865277	1.02319	0.097142	0.0390453		0.111758
		0.865405	1.0234	0.0965176	0.0389256		0.111565
		0.865472	1.02376	0.0960705	0.0388154		0.111542
		0.865668	1.02426	0.0958078	0.0386713		0.111506
		0.865804	1.02432	0.0955317	0.0386408		0.111433
		0.865887	1.02433	0.0954365	0.0385441		0.111237
		0.865961	1.02441	0.095422	0.0382776		0.111043
		0.866147	1.02535	0.0951151	0.0382353		0.111002
		0.866329	1.02571	0.0951028	0.0380469		0.110871
		0.866487	1.0258	0.0948368	0.0376037		0.110853
		0.866527	1.02589	0.0940837	0.0374774		0.110812
		0.866673	1.02595	0.0935136	0.0373132		0.110647
		0.866717	1.02651	0.0930593	0.037289		0.110419
		0.866735	1.02654	0.0925549	0.0372675		0.110415
		0.866755	1.02687	0.0916518	0.0372355		0.11039
		0.866801	1.02692	0.091356	0.0369891		0.110051
		0.866809	1.02709	0.0909628	0.0369345		0.109681
		0.866907	1.02724	0.0904731	0.0369209		0.109497
		0.866959	1.02728	0.0903206	0.036799		0.109261
		0.866966	1.02731	0.0902801	0.0367427		0.108561
		0.867143	1.02759	0.0902408	0.0367013		0.108522
		0.867236	1.02766	0.090225	0.0366094		0.108214
		0.867267	1.02777	0.0899928	0.0366053		0.108207
		0.867284	1.02795	0.0898095	0.0364735		0.108128
		0.86735	1.02835	0.0897751	0.0363734		0.108073
		0.867502	1.0285	0.0896954	0.0363274		0.10795
		0.867768	1.02851	0.0894691	0.0363219		0.107907
		0.867862	1.02862	0.0881022	0.0362957		0.107808
		0.867906	1.02926	0.0880142	0.0361031		0.107747
		0.867959	1.02987	0.0877587	0.0359216		0.107674
		0.868031	1.03032	0.0875891	0.035444		0.10752
		0.868125	1.03122	0.087372	0.0354327		0.106823
		0.868627	1.03127	0.0872301	0.0353466		0.106786
		0.868642	1.03183	0.0870327	0.0351894		0.106573
		0.868647	1.03202	0.0869023	0.0349193		0.106513
		0.868715	1.03205	0.086766	0.0347902		0.106475
		0.869055	1.03232	0.0866966	0.0346175		0.106235
		0.869136	1.0324	0.0865162	0.0345887		0.10606
		0.869172	1.03272	0.0861829	0.034402		0.105911
		0.869191	1.03286	0.0859951	0.0343041		0.105807
		0.869245	1.03295	0.0851919	0.0341874		0.105172
		0.869294	1.03309	0.0849294	0.0339198		0.105136
		0.869362	1.03349	0.0840193	0.0337849		0.105054
		0.869766	1.03368	0.0839734	0.0337454		0.104936
		0.869905	1.03386	0.0839387	0.0335418		0.104916
		0.869951	1.03434	0.0837752	0.0333331		0.104469
		0.870157	1.03451	0.0836164	0.0331875		0.104436
		0.870323	1.0346	0.0835701	0.0330061		0.104236
		0.870417	1.03461	0.0832963	0.0327945		0.104135
		0.870439	1.03509	0.0832661	0.0327676		0.10408
		0.870497	1.0354	0.0832177	0.0326162		0.103663
		0.870892	1.03546	0.0830104	0.0325937		0.103617
		0.870897	1.03595	0.0828976	0.0325439		0.103586
		0.870984	1.03599	0.0826589	0.0322101		0.10354
		0.871046	1.03627	0.0826162	0.0320708		0.103186
		0.871252	1.03635	0.0825355	0.0320387		0.103174
		0.871272	1.0364	0.0825355	0.0318788		0.102957
		0.871401	1.03654	0.0817536	0.0317337		0.102829
		0.871493	1.03656	0.0817318	0.0315339		0.102177
		0.871502	1.03731	0.0814592	0.0312848		0.101583
		0.871517	1.03742	0.0814534	0.0311602		0.101489
		0.871606	1.03787	0.0814206	0.0310677		0.101486
		0.871929	1.03822	0.0810482	0.0309695		0.101368
		0.871992	1.03886	0.0803542	0.0305711		0.10127
		0.872063	1.04019	0.0801711	0.0304704		0.101264
		0.872089	1.04102	0.079554	0.0303261		0.101029
		0.872095	1.04186	0.0794106	0.0301015		0.100937
		0.872186	1.04201	0.0793965	0.030014		0.100931
		0.872189	1.04235	0.0792742	0.0298767		0.10081
		0.872189	1.04239	0.0792291	0.0298188		0.100729
		0.87228	1.04248	0.0789047	0.0298146		0.100598
		0.872325	1.04445	0.078667	0.0296865		0.100346
		0.872353	1.04453	0.0785769	0.0295651		0.099848
		0.87238	1.04477	0.0784874	0.0295356		0.0998282
		0.872486	1.0449	0.0784686	0.029505		0.0992241
		0.872529	1.04564	0.0780938	0.0293512		0.0992209
		0.872619	1.04617	0.0780514	0.029253		0.0976398
		0.872677	1.04624	0.0779864	0.0291109		0.0976163
		0.872694	1.04637	0.0775774	0.0287708		0.0974843
		0.872701	1.0471	0.0770743	0.0285438		0.0974657
		0.872815	1.04715	0.0769492	0.0284257		0.0971486
		0.872865	1.04744	0.0765908	0.0283874		0.0970164
		0.872899	1.04828	0.0765493	0.0283796		0.096991
		0.872909	1.04844	0.0762102	0.0283487		0.0969246
		0.872989	1.04895	0.0760812	0.0283146		0.0969042
		0.872992	1.04928	0.0759416	0.0282507		0.0965237
		0.873004	1.04961	0.0758566	0.0282397		0.0965236
		0.873048	1.05038	0.0757914	0.0282099		0.0963596
		0.873053	1.05039	0.0753702	0.0280972		0.0961769
		0.873077	1.05056	0.0753514	0.0280829		0.0958356
		0.873163	1.05092	0.0752218	0.027858		0.0955523
		0.873176	1.05097	0.0751291	0.0277142		0.0954904
		0.873317	1.05207	0.0747415	0.0275107		0.0954469
		0.873332	1.05304	0.0746144	0.0274788		0.0953796
		0.873375	1.05317	0.0745783	0.0274368		0.0952609
		0.873416	1.05381	0.0743494	0.0274215		0.0949631
		0.873434	1.054	0.0738639	0.0273522		0.0948467
		0.873476	1.05429	0.0737431	0.0273256		0.0947314
		0.873527	1.05448	0.073589	0.0271955		0.0946949
		0.873532	1.05452	0.0734621	0.0271023		0.094488
		0.873623	1.05453	0.0733848	0.0269109		0.0940459
		0.873731	1.05454	0.0730184	0.0267744		0.094009
		0.87377	1.05491	0.0730074	0.0266419		0.0939403
		0.873858	1.05506	0.0729413	0.0266323		0.0938614
		0.873911	1.05591	0.0725904	0.0265329		0.0937821
		0.873919	1.05643	0.0724178	0.0265038		0.0936972
		0.873981	1.05661	0.0717165	0.0264302		0.0935138
		0.874114	1.05691	0.0713213	0.0262867		0.0934719
		0.87441	1.05705	0.0703905	0.0262813		0.0932848
		0.874433	1.05842	0.070204	0.0262614		0.0926368
		0.874521	1.0586	0.069972	0.0262296		0.092632
		0.874573	1.05909	0.0695263	0.0261779		0.092585
		0.874585	1.05912	0.0693252	0.0261042		0.0925543
		0.874755	1.05914	0.0690447	0.0260208		0.0925465
		0.874775	1.05926	0.069035	0.0260108		0.092523
		0.874934	1.05937	0.0689835	0.0259393		0.092466
		0.874949	1.06036	0.0687367	0.0259219		0.0924334
		0.875428	1.0605	0.068707	0.0258617		0.0921754
		0.875514	1.0607	0.0686313	0.0257947		0.0921162
		0.875574	1.06096	0.0675342	0.025739		0.0918364
		0.875603	1.06128	0.0670952	0.0256696		0.0918126
		0.875721	1.06163	0.0668578	0.0256671		0.0913792
		0.875842	1.06265	0.0668529	0.0254629		0.0912637
		0.875957	1.06274	0.0668352	0.0252597		0.0912215
		0.876001	1.06305	0.0664681	0.0250651		0.0910934
		0.876098	1.06327	0.0662524	0.0250217		0.0910497
		0.876272	1.06327	0.0659557	0.0244791		0.0907997
		0.876342	1.06374	0.0654785	0.0244628		0.0907024
		0.876373	1.0638	0.0651463	0.0243391		0.0906985
		0.876448	1.06394	0.0647764	0.0242052		0.0906837
		0.876478	1.06416	0.0644072	0.0238364		0.090288
		0.8767	1.06451	0.0644063	0.0237833		0.0898882
		0.876733	1.06465	0.0641164	0.0237624		0.0897767
		0.876739	1.06515	0.0639469	0.0237282		0.0896115
		0.876775	1.06587	0.0638087	0.023492		0.0894888
		0.876985	1.06737	0.0633526	0.0233658		0.0893623
		0.877025	1.06739	0.0632249	0.0233043		0.0891156
		0.877066	1.06823	0.0629121	0.0232768		0.0891063
		0.877121	1.06905	0.0625187	0.0232455		0.0890753
		0.877137	1.06916	0.0623785	0.0230099		0.0888689
		0.87714	1.06928	0.06236	0.0229683		0.088568
		0.877295	1.06959	0.062207	0.0229294		0.0882849
		0.877392	1.07039	0.0617745	0.0227575		0.0882135
		0.877509	1.07111	0.0616618	0.0227062		0.0881249
		0.877552	1.07169	0.0615412	0.0222733		0.0880619
		0.877554	1.07242	0.0613764	0.0221464		0.08743
		0.877623	1.07244	0.0609775	0.0219346		0.0872337
		0.877728	1.07266	0.0601776	0.0219225		0.0871133
		0.877829	1.07299	0.0601699	0.0218003		0.0870897
		0.878175	1.0732	0.0599976	0.0214961		0.0869582
		0.878204	1.07399	0.0593734	0.0209698		0.0868254
		0.878348	1.074	0.0592901	0.0208778		0.0867199
		0.878376	1.07508	0.0591147	0.0207035		0.0866215
		0.878393	1.07558	0.0590211	0.0206958		0.0862467
		0.878474	1.07598	0.0589001	0.0206072		0.0862112
		0.878498	1.07601	0.0585476	0.020519		0.0862014
		0.878572	1.07603	0.0584108	0.0204159		0.086182
		0.878894	1.07647	0.0583426	0.0202607		0.0861803
		0.87896	1.07694	0.0582035	0.0201355		0.0861678
		0.878971	1.07792	0.0575972	0.0199069		0.0861532
		0.879074	1.07915	0.0574746	0.0197155		0.0859267
		0.879187	1.07941	0.0574319	0.0194883		0.085794
		0.879213	1.0795	0.056617	0.0194178		0.0855826
		0.879624	1.07996	0.0561967	0.0193178		0.0854923
		0.879657	1.08225	0.0560619	0.0192828		0.0853439
		0.880043	1.0824	0.0560403	0.0191726		0.085169
		0.8801	1.08267	0.056004	0.0191428		0.0851499
		0.880166	1.08316	0.0559649	0.0189666		0.0851072
		0.880227	1.08321	0.0558914	0.018731		0.0850381
		0.880489	1.08419	0.0558877	0.0187107		0.0848766
		0.880508	1.08425	0.0558405	0.0182484		0.0848626
		0.880518	1.08429	0.0552999	0.018232		0.0848393
		0.880623	1.08435	0.0551621	0.01817		0.0848249
		0.880651	1.08467	0.0551575	0.0180688		0.0845526
		0.880909	1.08483	0.0547959	0.0180301		0.0841964
		0.881019	1.08577	0.0542268	0.0178679		0.0841569
		0.881058	1.08582	0.0541128	0.0175428		0.0839886
		0.881269	1.08643	0.0539578	0.0173573		0.0839163
		0.881479	1.08643	0.053414	0.017346		0.0838857
		0.881562	1.08689	0.0528797	0.0173189		0.0838622
		0.881607	1.08718	0.0526389	0.0172927		0.0837128
		0.881669	1.08721	0.0526075	0.0169418		0.083382
		0.882015	1.08772	0.0523034	0.0169339		0.08324
		0.882048	1.08773	0.052242	0.0169058		0.0832027
		0.882064	1.0881	0.0518724	0.0166593		0.0831863
		0.882067	1.08849	0.0517854	0.0164345		0.0830206
		0.882197	1.08889	0.051388	0.0163879		0.0828681
		0.882241	1.08927	0.051275	0.0163676		0.0827734
		0.882253	1.08953	0.0509557	0.0163523		0.0823099
		0.882292	1.09183	0.0506521	0.0163079		0.0820307
		0.882307	1.09193	0.0495389	0.0162044		0.081928
		0.882398	1.0933	0.0494914	0.0161802		0.0816095
		0.882402	1.09369	0.049476	0.0160492		0.0814953
		0.882417	1.09386	0.0493134	0.0159948		0.0814915
		0.882427	1.09453	0.0492657	0.015808		0.0814664
		0.88248	1.09581	0.049042	0.015808		0.0811907
		0.882502	1.09592	0.0487055	0.015666		0.0803613
		0.882598	1.09702	0.0484648	0.0153411		0.0803307
		0.88264	1.0976	0.048245	0.0151149		0.0803149
		0.882707	1.09832	0.0478258	0.0150405		0.0798991
		0.882715	1.09863	0.0473842	0.0150025		0.0798065
		0.882772	1.09871	0.0473708	0.0149884		0.0797348
		0.882782	1.0992	0.0470193	0.0149736		0.0795395
		0.882806	1.10051	0.046852	0.0149718		0.0794173
		0.883165	1.10125	0.0464107	0.0147936		0.0793242
		0.883202	1.10204	0.046354	0.014638		0.0792951
		0.883226	1.10219	0.0460027	0.014546		0.0791973
		0.88327	1.10247	0.0459716	0.0144481		0.0790838
		0.883447	1.10264	0.0459019	0.0141558		0.078691
		0.883517	1.10289	0.0459013	0.0140751		0.0785193
		0.883573	1.10389	0.0455239	0.014059		0.0783022
		0.883601	1.104	0.045491	0.0138608		0.0781839
		0.883603	1.10416	0.0454812	0.013635		0.0781575
		0.88361	1.10418	0.0451956	0.0136003		0.0781211
		0.883672	1.10561	0.0450605	0.0135506		0.0780062
		0.883805	1.10601	0.0450096	0.0134994		0.0778503
		0.883912	1.10662	0.0442803	0.0133487		0.0777971
		0.884091	1.10742	0.04409	0.0133453		0.0777908
		0.884095	1.10832	0.0437037	0.0132418		0.0776205
		0.884171	1.10871	0.0434001	0.0132038		0.0776043
		0.884184	1.1095	0.0433893	0.0130565		0.0774541
		0.884326	1.10962	0.0432292	0.0129931		0.0772895
		0.884337	1.10971	0.0431439	0.0126235		0.0772091
		0.884345	1.11011	0.0431137	0.0125987		0.0772035
		0.884361	1.1102	0.0430813	0.0125797		0.0769833
		0.884614	1.11034	0.04306	0.0125435		0.0768628
		0.884646	1.11077	0.0427436	0.0117889		0.0768518
		0.884783	1.1108	0.0426615	0.0117357		0.0766263
		0.885028	1.1116	0.0424947	0.0116895		0.0764075
		0.885032	1.11211	0.0421635	0.0116815		0.0763873
		0.885199	1.1128	0.0419876	0.01149		0.0763466
		0.885204	1.11377	0.0410798	0.0111581		0.0763466
		0.885294	1.11384	0.0405943	0.0110768		0.0762326
		0.885352	1.11462	0.0405526	0.0110768		0.07622
		0.885371	1.11562	0.0403349	0.0110671		0.0761683
		0.885513	1.11654	0.0399457	0.010988		0.0760026
		0.885546	1.11681	0.0398852	0.0109476		0.0758947
		0.885568	1.11746	0.0398781	0.0108906		0.0758875
		0.885616	1.11773	0.0392403	0.0107838		0.0758658
		0.88592	1.11914	0.0389638	0.0107166		0.0758574
		0.885941	1.12034	0.0385297	0.0106578		0.0756837
		0.885951	1.12037	0.038424	0.0106306		0.0756806
		0.886113	1.12063	0.0383085	0.0105604		0.0753862
		0.886354	1.12205	0.0376986	0.0105319		0.0753333
		0.886401	1.12303	0.0370697	0.0105141		0.0752877
		0.886579	1.12374	0.0370352	0.0105064		0.0752807
		0.88664	1.12509	0.036919	0.0103041		0.0751329
		0.886716	1.12518	0.0363221	0.0102586		0.0749504
		0.886725	1.12829	0.0359199	0.0101809		0.074935
		0.886738	1.12886	0.0359072	0.010072		0.0748491
		0.886786	1.12985	0.0355313	0.0100714		0.0746111
		0.886787	1.13059	0.03547	0.00999986		0.0745514
		0.886795	1.13094	0.0354139	0.00996642		0.074301
		0.886815	1.13216	0.0352557	0.00978169		0.0742699
		0.886859	1.13227	0.035018	0.00975735		0.0741486
		0.88697	1.13278	0.0349612	0.0097023		0.0741025
		0.88718	1.13546	0.0346906	0.00958188		0.0738065
		0.887195	1.13649	0.0346262	0.00954491		0.0735817
		0.887287	1.13714	0.0341777	0.00946111		0.0735689
		0.887435	1.13775	0.0336466	0.0094201		0.073509
		0.887442	1.13964	0.0332751	0.0093967		0.0734974
		0.887777	1.14049	0.0329103	0.00928101		0.0734085
		0.887801	1.14382	0.0324541	0.00910352		0.0732841
		0.887951	1.14614	0.0322898	0.00893889		0.0732011
		0.888032	1.14962	0.0322423	0.00888849		0.0731528
		0.888064	1.15154	0.0321959	0.00872465		0.0730269
		0.888085	1.15239	0.0317673	0.00867715		0.0729417
		0.888123	1.15341	0.0310339	0.00865072		0.0725852
		0.888144	1.15738	0.0305876	0.00861246		0.0725736
		0.888162	1.15977	0.0304964	0.00859796		0.0725404
		0.888181	1.16525	0.0304446	0.00857542		0.072385
		0.888306	1.16862	0.0304367	0.00843298		0.0722439
		0.888321	1.16911	0.030104	0.0082328		0.0722196
		0.888513	1.17886	0.0296109	0.00820691		0.0719509
		0.888578	1.17999	0.0293636	0.00801517		0.0719485
		0.888721	1.18547	0.0290449	0.00788068		0.0718509
		0.888766	1.1885	0.0288037	0.00742943		0.0716149
		0.889201	1.20291	0.0284738	0.00735669		0.071598
		0.889209	1.20295	0.028285	0.00733234		0.0714875
		0.889272	1.20908	0.0275852	0.00724245		0.0714399
		0.889513	1.21356	0.027223	0.00722364		0.0706515
		0.889714	1.22089	0.0269233	0.00698806		0.0706272
		0.889729	1.22838	0.0269058	0.00694569		0.0705697
		0.889837	1.23964	0.0268789	0.0069231		0.0705641
		0.889904	1.26117	0.0265763	0.00689029		0.0705318
		0.890061	1.27493	0.0265297	0.0067571		0.0704727
		0.890209	1.39134	0.0262272	0.00670298		0.0704216
		0.890433	1.39516	0.0258426	0.00663431		0.0702706
		0.890462		0.0257851	0.00653401		0.070247
		0.890468		0.0257405	0.00651611		0.0702207
		0.890601		0.0253732	0.00648631		0.0698739
		0.890673		0.0251039	0.00647413		0.0698417
		0.890715		0.0250712	0.00637529		0.0698239
		0.890773		0.0246936	0.00625767		0.0697602
		0.890806		0.0246571	0.00577654		0.0694049
		0.890813		0.0246211	0.00569287		0.0692903
		0.890915		0.0244551	0.00569274		0.0692209
		0.890935		0.0244056	0.00547315		0.0688601
		0.890978		0.0239089	0.00543781		0.0686711
		0.891029		0.0239022	0.00530574		0.0685847
		0.89105		0.0235172	0.00497909		0.0685745
		0.891293		0.023492	0.00495367		0.0684402
		0.891311		0.0234215	0.00457811		0.0683303
		0.891319		0.0232428	0.00451725		0.0681543
		0.891334		0.0232213	0.00447148		0.0681126
		0.891397		0.0231398	0.00446019		0.0680029
		0.891488		0.0231391	0.00427761		0.0679742
		0.891744		0.0231029	0.0041379		0.0678686
		0.891751		0.0229538	0.00398455		0.067379
		0.891802		0.022784	0.00392667		0.0672166
		0.891949		0.0224597	0.0036705		0.0671274
		0.892008		0.0219088	0.00347691		0.0668204
		0.892043		0.0218485	0.00334384		0.066764
		0.892113		0.0218085	0.00322148		0.0665055
		0.892241		0.021767	0.00299538		0.0664131
		0.892315		0.0215282	0.00287952		0.0663554
		0.892324		0.0209695	0.00272882		0.066336
		0.892346		0.0203455	0.00269016		0.0656
		0.892355		0.0199576	0.00257741		0.0655019
		0.892403		0.0198579	0.00240964		0.0652368
		0.892417		0.019704	0.00229639		0.0652078
		0.892478		0.0196288	0.00207244		0.0649984
		0.892502		0.019475	0.00205941		0.0646575
		0.892594		0.0192438	0.00196772		0.0644902
		0.892623		0.0189847	0.0019615		0.0644105
		0.892802		0.0187127	0.00196145		0.0643092
		0.892852		0.0184983	0.00179938		0.0642708
		0.892912		0.0184064	0.00165288		0.0642285
		0.892928		0.0174729	0.00143441		0.0641713
		0.892933		0.0174506	0.00115351		0.0640794
		0.893025		0.0173975	0.00113006		0.0638032
		0.89306		0.0171615	0.00103485		0.0637805
		0.893307		0.0171131	0.000906432		0.0636758
		0.893313		0.0168037	0.000655737		0.0636306
		0.893376		0.0163288	0.000642466		0.063555
		0.893403		0.0159652	0.000627779		0.0633485
		0.893406		0.0158989	0.000255621		0.0632477
		0.893407		0.0158528	0.000252733		0.0630317
		0.893442		0.0157559	0.000211574		0.0629561
		0.893525		0.0155766	0.000159618		0.0628768
		0.893549		0.0151263	0.000158791		0.0627524
		0.893557		0.0150335	-0.000144392		0.0627466
		0.893562		0.0149561	-0.00022839		0.0627061
		0.893647		0.014657	-0.000308895		0.0626905
		0.893704		0.0144413	-0.000505493		0.0626683
		0.893713		0.0144295	-0.000536477		0.0625643
		0.894027		0.0140828	-0.00064396		0.0623294
		0.894152		0.0139307	-0.000699731		0.0620259
		0.89417		0.013246	-0.000754675		0.0618866
		0.894232		0.0132427	-0.00102422		0.0617146
		0.894242		0.0131248	-0.00111992		0.0611896
		0.894279		0.0126866	-0.00113442		0.0611329
		0.894294		0.0120663	-0.00119302		0.0608966
		0.894351		0.0114743	-0.00131952		0.0607312
		0.894355		0.0114545	-0.00134822		0.0605197
		0.894487		0.0114286	-0.00154931		0.0603852
		0.894542		0.0113696	-0.00155177		0.0602666
		0.894557		0.0111535	-0.00173948		0.0602614
		0.894569		0.010935	-0.00184977		0.0600312
		0.894602		0.0103107	-0.00189964		0.0598371
		0.894675		0.010304	-0.00197223		0.0597094
		0.894703		0.0100826	-0.00206791		0.0596318
		0.894717		0.0095249	-0.0022733		0.0596056
		0.895156		0.00891685	-0.00238081		0.0596047
		0.895349		0.0087749	-0.00239685		0.0594882
		0.895376		0.00871746	-0.0025758		0.0593358
		0.89549		0.00821012	-0.0026683		0.0593245
		0.89573		0.00797863	-0.00281226		0.0593166
		0.895768		0.0079087	-0.00281542		0.059288
		0.89579		0.00771931	-0.00290069		0.0592164
		0.895819		0.00738358	-0.00300362		0.0590726
		0.895885		0.00730105	-0.00323786		0.0588748
		0.895913		0.0069914	-0.00328816		0.0588202
		0.895928		0.00651879	-0.00333307		0.0588169
		0.895988		0.00576312	-0.00339435		0.0587805
		0.896066		0.00564521	-0.00358113		0.0585905
		0.896071		0.00540386	-0.00361727		0.0584229
		0.896083		0.00522076	-0.00385857		0.0582315
		0.896111		0.00509724	-0.00423493		0.0581727
		0.896273		0.00458714	-0.00424236		0.0579945
		0.896483		0.00432664	-0.00428984		0.0577626
		0.896523		0.00387771	-0.00432097		0.057409
		0.896737		0.00356029	-0.00445701		0.0574013
		0.89674		0.00315458	-0.00454443		0.057248
		0.896742		0.00296007	-0.00479909		0.0572257
		0.896951		0.0020472	-0.00497054		0.0570072
		0.896986		0.00203339	-0.00497484		0.0569215
		0.897031		0.00193052	-0.00517913		0.0568655
		0.897206		0.00136843	-0.00527056		0.0568489
		0.897224		0.00109283	-0.00529229		0.0566428
		0.897379		0.000922665	-0.00530531		0.0565004
		0.897424		0.000633339	-0.00536115		0.056402
		0.89752		0.000560257	-0.00576106		0.0562861
		0.897671		0.000543193	-0.00583841		0.0562663
		0.897683		7.21e-05	-0.00593722		0.055726
		0.897724		-0.000204885	-0.00595231		0.0556563
		0.897724		-0.000540419	-0.0059782		0.0554361
		0.897851		-0.000558239	-0.00599318		0.0554075
		0.898072		-0.000910728	-0.00610142		0.0553311
		0.898183		-0.00106488	-0.00618812		0.055242
		0.898193		-0.00162428	-0.00621797		0.0549138
		0.89821		-0.00206773	-0.00622028		0.0548944
		0.898292		-0.00231938	-0.00623314		0.054888
		0.898312		-0.0023963	-0.00636974		0.0548453
		0.898371		-0.00268776	-0.00640489		0.0548279
		0.898394		-0.00294276	-0.0064825		0.0547892
		0.898404		-0.00301829	-0.00680538		0.0545662
		0.898442		-0.00340592	-0.00694451		0.0540525
		0.898474		-0.0043595	-0.00696937		0.0539759
		0.898509		-0.0048381	-0.00702889		0.0539323
		0.898534		-0.00505151	-0.00713918		0.0538897
		0.898635		-0.00524173	-0.00715234		0.053806
		0.898663		-0.00526902	-0.00721968		0.0536
		0.898704		-0.00567291	-0.00727797		0.0534992
		0.898832		-0.00586767	-0.00729279		0.0534135
		0.899137		-0.00601747	-0.00738897		0.0531264
		0.899161		-0.00645185	-0.00749588		0.0526903
		0.899189		-0.00647175	-0.00756941		0.0524987
		0.899312		-0.00648256	-0.00773458		0.0523483
		0.899341		-0.00658527	-0.00778207		0.0523394
		0.89938		-0.00660535	-0.00785241		0.0521475
		0.899472		-0.00711709	-0.0078675		0.0521067
		0.899493		-0.00752188	-0.00788534		0.0519808
		0.899497		-0.00753815	-0.00800182		0.0519482
		0.899783		-0.00780005	-0.00823584		0.0518939
		0.899897		-0.00803293	-0.00829566		0.0518682
		0.900018		-0.0088726	-0.00848199		0.0518589
		0.900044		-0.00887345	-0.00857153		0.0518111
		0.900049		-0.009082	-0.00863422		0.0517949
		0.900133		-0.0098214	-0.00876939		0.051769
		0.900302		-0.0102593	-0.00880186		0.0516269
		0.900434		-0.0114803	-0.00882341		0.0513088
		0.900441		-0.0116342	-0.00899306		0.0512898
		0.900466		-0.0116845	-0.00912417		0.0512341
		0.900508		-0.0117017	-0.00913016		0.0511094
		0.900587		-0.0117609	-0.00921297		0.0511037
		0.900607		-0.0121047	-0.00925303		0.0510336
		0.900698		-0.0126918	-0.0093933		0.0509817
		0.900941		-0.0132648	-0.00941376		0.0509613
		0.900941		-0.0136702	-0.00983453		0.0509321
		0.901185		-0.014077	-0.00988783		0.0501026
		0.901201		-0.0141096	-0.00989801		0.0500567
		0.901265		-0.0142162	-0.0099653		0.0497783
		0.901284		-0.015008	-0.0102899		0.0496076
		0.901327		-0.0151062	-0.0102899		0.0493414
		0.901337		-0.0154033	-0.0103549		0.0493052
		0.901406		-0.0156653	-0.010382		0.0492956
		0.90142		-0.0159476	-0.0108792		0.0490661
		0.901449		-0.0164055	-0.0109814		0.0488644
		0.901527		-0.0168518	-0.0110027		0.0488351
		0.901533		-0.0172425	-0.0111333		0.0487842
		0.901583		-0.0174247	-0.0111786		0.0486275
		0.9016		-0.0183126	-0.0112844		0.0485363
		0.901644		-0.018421	-0.0114088		0.0484651
		0.901692		-0.0193925	-0.011442		0.0484582
		0.901806		-0.0197386	-0.0114807		0.048007
		0.90186		-0.0197626	-0.0116885		0.0479348
		0.901866		-0.019975	-0.0117853		0.0476057
		0.901877		-0.0203623	-0.0119121		0.0474819
		0.901882		-0.0206974	-0.0119172		0.0474271
		0.901911		-0.020852	-0.0120241		0.0473066
		0.902062		-0.0208946	-0.0124033		0.0468851
		0.902088		-0.0214043	-0.0124245		0.046831
		0.902094		-0.0218965	-0.0124867		0.0468006
		0.902225		-0.022369	-0.0125257		0.046797
		0.902252		-0.0228175	-0.0125884		0.0466817
		0.902353		-0.0228883	-0.0127051		0.0465447
		0.90242		-0.0229035	-0.0128044		0.0465311
		0.902442		-0.0237552	-0.0128469		0.0464157
		0.902452		-0.0238065	-0.0130012		0.0462176
		0.902459		-0.023903	-0.0131502		0.0461656
		0.902507		-0.0249347	-0.013216		0.0461062
		0.902518		-0.0249502	-0.0132833		0.0460223
		0.902592		-0.0251877	-0.0134158		0.0459754
		0.90264		-0.0257093	-0.0134849		0.0459204
		0.902709		-0.0257302	-0.0135772		0.0459054
		0.902798		-0.0257689	-0.0136171		0.0457841
		0.902878		-0.0257798	-0.0137783		0.0457725
		0.902952		-0.0261807	-0.0138193		0.0456763
		0.903047		-0.0262692	-0.0138543		0.0455826
		0.903127		-0.0264188	-0.0138822		0.0455383
		0.903159		-0.0270313	-0.0139013		0.0455001
		0.903262		-0.0272734	-0.0139337		0.045296
		0.903341		-0.0276915	-0.014028		0.0450488
		0.903419		-0.0279382	-0.014029		0.044943
		0.903461		-0.0279881	-0.0140931		0.0449333
		0.903495		-0.0283622	-0.0141097		0.0448918
		0.903793		-0.028742	-0.0142227		0.0447402
		0.903944		-0.0287441	-0.0143833		0.0446371
		0.904019		-0.0294763	-0.0143874		0.0442481
		0.90403		-0.0296294	-0.014432		0.0442394
		0.904044		-0.0312585	-0.0144515		0.0440534
		0.904084		-0.0313778	-0.014683		0.0440358
		0.904113		-0.0314509	-0.0146969		0.0439413
		0.904299		-0.0318414	-0.0147654		0.0438851
		0.904332		-0.0323159	-0.0148186		0.0438266
		0.904369		-0.0325699	-0.0149166		0.0436884
		0.904369		-0.0327092	-0.0149428		0.0436498
		0.904385		-0.0331096	-0.0149941		0.0435095
		0.904447		-0.0336018	-0.0149942		0.0434819
		0.904459		-0.0343779	-0.015049		0.0433071
		0.904463		-0.0343873	-0.0151861		0.0433048
		0.904566		-0.0344722	-0.0153747		0.043282
		0.90458		-0.0345572	-0.0154005		0.0432678
		0.904698		-0.0352335	-0.0154162		0.0427291
		0.904704		-0.0369508	-0.0156458		0.042663
		0.904735		-0.0370484	-0.0156839		0.0422045
		0.904801		-0.037089	-0.0158088		0.0421893
		0.904921		-0.0384706	-0.0158593		0.0419804
		0.905003		-0.0387712	-0.016069		0.0419118
		0.905005		-0.0387922	-0.0160994		0.0418526
		0.905007		-0.0388154	-0.0161529		0.0418056
		0.905008		-0.0388754	-0.0161581		0.0415838
		0.905035		-0.0394565	-0.0162078		0.0412981
		0.905042		-0.0397658	-0.0162413		0.0412886
		0.905055		-0.039801	-0.0162983		0.0412767
		0.90506		-0.0411368	-0.0163931		0.0412136
		0.90506		-0.0414534	-0.016449		0.0412057
		0.905064		-0.0414853	-0.0165995		0.0411743
		0.905104		-0.041934	-0.0166077		0.0411087
		0.905127		-0.0430354	-0.0168192		0.0410262
		0.905155		-0.0430404	-0.0171588		0.0409751
		0.905252		-0.0433234	-0.017259		0.0408797
		0.905295		-0.0434829	-0.0173797		0.0408356
		0.905317		-0.0436452	-0.0175053		0.040676
		0.905343		-0.0438304	-0.0175565		0.0405618
		0.905415		-0.0442106	-0.0176351		0.040275
		0.905449		-0.044248	-0.0176884		0.0402347
		0.905467		-0.0448158	-0.0178985		0.0402037
		0.905505		-0.0449073	-0.0180393		0.0401308
		0.90555		-0.0454247	-0.0182778		0.0400743
		0.90555		-0.0456473	-0.0186178		0.039905
		0.905615		-0.0456682	-0.0187384		0.0396027
		0.905654		-0.0461012	-0.0187504		0.0392478
		0.905776		-0.0463527	-0.0188009		0.0390945
		0.90595		-0.0468761	-0.0189706		0.0390925
		0.905972		-0.04715	-0.0191232		0.0386076
		0.906009		-0.047564	-0.0191878		0.0384978
		0.906069		-0.0479288	-0.0192522		0.0383736
		0.906101		-0.0488796	-0.0195894		0.0383097
		0.906106		-0.0490392	-0.0196995		0.0381232
		0.906161		-0.0491381	-0.0199138		0.0381113
		0.906313		-0.0495135	-0.0199286		0.037468
		0.906337		-0.0496583	-0.0200665		0.0374626
		0.906354		-0.0498494	-0.0200826		0.0374232
		0.906357		-0.0499245	-0.0202525		0.0373347
		0.906494		-0.0500451	-0.0203648		0.0373079
		0.906513		-0.0506664	-0.0203808		0.0372332
		0.906518		-0.0519927	-0.0205824		0.0371111
		0.906613		-0.0522976	-0.0206321		0.0367199
		0.906706		-0.0526505	-0.0206655		0.0366742
		0.906754		-0.0528527	-0.0208242		0.0366431
		0.906918		-0.0533113	-0.0208471		0.0364842
		0.907164		-0.0534825	-0.0208964		0.0363656
		0.907194		-0.0537748	-0.0211189		0.0362788
		0.90725		-0.0545784	-0.0211454		0.0361159
		0.907321		-0.0549686	-0.0214776		0.0360038
		0.907338		-0.0564273	-0.0214958		0.0360019
		0.907341		-0.0566471	-0.0214978		0.0354926
		0.907394		-0.0568534	-0.0215821		0.0352864
		0.907553		-0.0582387	-0.0218994		0.0352487
		0.907556		-0.0586473	-0.0219768		0.0349392
		0.907565		-0.0587478	-0.0220302		0.0347855
		0.907623		-0.0588393	-0.0221872		0.0347842
		0.907631		-0.0589126	-0.0222004		0.0346767
		0.90765		-0.0589821	-0.0222101		0.0345987
		0.907687		-0.0590692	-0.0222938		0.0345615
		0.907702		-0.0595544	-0.0222955		0.0343571
		0.907721		-0.0599128	-0.0225045		0.0343343
		0.908013		-0.0602387	-0.0225265		0.0342448
		0.90807		-0.0604839	-0.0225454		0.0341855
		0.908071		-0.0606306	-0.0227422		0.03399
		0.908082		-0.0606712	-0.0228031		0.0338892
		0.908097		-0.0610251	-0.0228164		0.0337459
		0.908097		-0.061184	-0.0231265		0.0333728
		0.90813		-0.0613564	-0.0231849		0.0329484
		0.908161		-0.0652368	-0.0234408		0.0325403
		0.908209		-0.0653727	-0.0234589		0.0324784
		0.908326		-0.065456	-0.0234709		0.0324324
		0.908468		-0.0657902	-0.0235258		0.0322488
		0.908511		-0.0661858	-0.0235354		0.0322292
		0.908603		-0.0667223	-0.023654		0.0321064
		0.90863		-0.0696275	-0.0237677		0.0320218
		0.908642		-0.0697954	-0.0237757		0.0319601
		0.908679		-0.0705222	-0.0238437		0.0319093
		0.908718		-0.0708988	-0.0240922		0.0316493
		0.908756		-0.0710266	-0.0242645		0.0315364
		0.908768		-0.071287	-0.0243437		0.0315006
		0.909046		-0.071582	-0.0244377		0.0314191
		0.909106		-0.0721992	-0.0245779		0.0313682
		0.909127		-0.0724431	-0.0247898		0.0310544
		0.909155		-0.0725046	-0.0248739		0.0309903
		0.909241		-0.0728353	-0.02492		0.0309472
		0.909305		-0.0739403	-0.0249556		0.0309162
		0.909387		-0.0743691	-0.0249597		0.0306638
		0.909439		-0.0744248	-0.025038		0.0304185
		0.909452		-0.0745119	-0.0251202		0.0303891
		0.909493		-0.0746019	-0.0253106		0.0303034
		0.909655		-0.0759841	-0.0254148		0.0302324
		0.909657		-0.0763843	-0.0255449		0.0301626
		0.909753		-0.0771319	-0.025682		0.0298917
		0.909792		-0.0790359	-0.0258056		0.0298786
		0.909856		-0.0793645	-0.0258426		0.0297435
		0.910063		-0.0796416	-0.0259478		0.0296939
		0.910192		-0.0798903	-0.0259989		0.0295995
		0.910202		-0.0800301	-0.0260143		0.0294395
		0.910243		-0.0805865	-0.0260888		0.0294138
		0.910366		-0.0817389	-0.0262917		0.0289894
		0.910373		-0.0819159	-0.0265175		0.0288428
		0.910393		-0.0827025	-0.0265993		0.0286145
		0.910435		-0.0842836	-0.0268566		0.0286101
		0.91045		-0.0846297	-0.0269356		0.028562
		0.910454		-0.0863777	-0.0269472		0.028558
		0.910563		-0.0872906	-0.0270183		0.0285442
		0.910625		-0.0877577	-0.0271029		0.0283037
		0.910806		-0.0881897	-0.0271077		0.0282979
		0.910816		-0.0882959	-0.0273233		0.0282063
		0.910898		-0.0889693	-0.0274955		0.0280655
		0.910978		-0.089676	-0.0276304		0.0280583
		0.911038		-0.0900648	-0.027654		0.028014
		0.911064		-0.0902023	-0.0278118		0.0279992
		0.911067		-0.0905203	-0.0278819		0.0279891
		0.911075		-0.0908604	-0.0278987		0.0279373
		0.911141		-0.0917863	-0.027937		0.0279318
		0.911311		-0.0924177	-0.0279626		0.0276997
		0.911358		-0.0925895	-0.0280761		0.0276309
		0.911399		-0.092675	-0.0281735		0.0272334
		0.911471		-0.0929309	-0.0283025		0.0271152
		0.911574		-0.0929677	-0.0283468		0.027073
		0.911622		-0.0933549	-0.0283598		0.0270079
		0.911714		-0.0943675	-0.0286616		0.027004
		0.911726		-0.0945815	-0.0287359		0.0267225
		0.911927		-0.0961072	-0.0287835		0.0267168
		0.911984		-0.0963705	-0.0288104		0.0266973
		0.912227		-0.0980766	-0.0288415		0.0266771
		0.912246		-0.098609	-0.0290309		0.0266432
		0.912256		-0.0987288	-0.029132		0.0266389
		0.912293		-0.0990205	-0.0291948		0.0266221
		0.912337		-0.0991485	-0.0294104		0.0264768
		0.912365		-0.0994515	-0.0295256		0.0260506
		0.912382		-0.0996537	-0.0296004		0.0260162
		0.912556		-0.101067	-0.0296355		0.025948
		0.912634		-0.101127	-0.0299613		0.0255335
		0.912737		-0.10116	-0.0300693		0.0255042
		0.912745		-0.101508	-0.0303876		0.0252544
		0.912793		-0.101845	-0.0304575		0.0250522
		0.912879		-0.102303	-0.0306076		0.0250151
		0.913016		-0.102308	-0.030696		0.0250081
		0.913091		-0.102563	-0.0308756		0.0249437
		0.913107		-0.102853	-0.0309306		0.0248936
		0.91326		-0.103172	-0.0310706		0.0248175
		0.913377		-0.103287	-0.031313		0.0248076
		0.913494		-0.103724	-0.0313716		0.024736
		0.913596		-0.104458	-0.0314713		0.0246712
		0.91361		-0.104868	-0.0314887		0.0245901
		0.913634		-0.105628	-0.0316162		0.0243963
		0.913636		-0.105675	-0.0316735		0.0243812
		0.913653		-0.106993	-0.0317896		0.0242272
		0.913663		-0.107955	-0.0317957		0.0239399
		0.913881		-0.10825	-0.0318282		0.0239106
		0.91399		-0.108477	-0.0319484		0.0238705
		0.914025		-0.108571	-0.0319665		0.0233528
		0.914163		-0.108631	-0.0320636		0.0231337
		0.914197		-0.108849	-0.0321125		0.0230818
		0.914297		-0.109352	-0.032222		0.0229896
		0.914567		-0.109729	-0.0323446		0.0227371
		0.914622		-0.109878	-0.0324203		0.0224976
		0.914742		-0.110254	-0.0325505		0.0224536
		0.914814		-0.110609	-0.0325719		0.0223691
		0.91487		-0.112406	-0.0325763		0.0223229
		0.91503		-0.113045	-0.0326033		0.0223122
		0.915092		-0.114072	-0.0326348		0.022275
		0.915104		-0.114107	-0.0328339		0.0221168
		0.915203		-0.114386	-0.0328339		0.0220427
		0.915233		-0.11475	-0.0329016		0.0220303
		0.915269		-0.115274	-0.0329263		0.0219717
		0.915297		-0.117255	-0.0329311		0.0218173
		0.91532		-0.11776	-0.032968		0.0218053
		0.91532		-0.118275	-0.0330533		0.02161
		0.915359		-0.118926	-0.0330875		0.0214434
		0.915412		-0.119082	-0.0331037		0.0210537
		0.915516		-0.11929	-0.0333071		0.0210178
		0.915617		-0.119343	-0.0333305		0.0209506
		0.915642		-0.119343	-0.033453		0.0208424
		0.915682		-0.119489	-0.0336203		0.020792
		0.915713		-0.119718	-0.0339322		0.0207661
		0.915761		-0.119855	-0.0340683		0.020275
		0.915778		-0.119987	-0.0341137		0.0202415
		0.915802		-0.12015	-0.0342506		0.0199545
		0.915896		-0.120612	-0.0342877		0.0199462
		0.915972		-0.121306	-0.0343157		0.0197884
		0.91601		-0.121451	-0.0343172		0.0197389
		0.916034		-0.121829	-0.0344635		0.0196836
		0.916038		-0.122206	-0.0345309		0.0195443
		0.916074		-0.122678	-0.0346309		0.0194725
		0.916189		-0.122885	-0.0348352		0.019471
		0.916223		-0.124427	-0.0349162		0.019412
		0.91635		-0.124472	-0.0351758		0.0192391
		0.916485		-0.125259	-0.035784		0.0189748
		0.916504		-0.125416	-0.0358528		0.0188802
		0.91674		-0.125487	-0.0358934		0.018587
		0.916749		-0.1263	-0.0361928		0.0184446
		0.91689		-0.126306	-0.0361928		0.0184372
		0.916933		-0.12648	-0.0362315		0.0183359
		0.916934		-0.126526	-0.0362757		0.0182126
		0.916949		-0.12733	-0.036871		0.0181935
		0.917089		-0.127649	-0.0369669		0.0181346
		0.917114		-0.128272	-0.0369876		0.0180015
		0.917151		-0.128868	-0.0370087		0.017919
		0.917238		-0.130095	-0.037175		0.0178853
		0.917292		-0.130124	-0.0374416		0.0177778
		0.917376		-0.130124	-0.0374636		0.0176193
		0.917424		-0.130362	-0.0375969		0.017602
		0.917487		-0.131378	-0.0376006		0.0175631
		0.91764		-0.132314	-0.0376142		0.0175411
		0.917751		-0.13273	-0.0376389		0.0175346
		0.917751		-0.13282	-0.0377801		0.0170011
		0.917771		-0.133034	-0.0379105		0.0169675
		0.917839		-0.134566	-0.0379668		0.0168007
		0.917901		-0.134778	-0.0379946		0.0167645
		0.917918		-0.135329	-0.0380362		0.0166587
		0.917938		-0.13572	-0.0380458		0.0166576
		0.917953		-0.136281	-0.0380534		0.016549
		0.918002		-0.136388	-0.0380682		0.0164934
		0.918009		-0.136705	-0.0382584		0.0163748
		0.918091		-0.136849	-0.0382651		0.0162246
		0.918177		-0.136986	-0.0383956		0.0161017
		0.918183		-0.13749	-0.0385945		0.0159555
		0.918242		-0.137547	-0.0386611		0.0159485
		0.918256		-0.138194	-0.0386648		0.0158979
		0.918329		-0.139084	-0.039146		0.0158652
		0.918376		-0.139444	-0.0391766		0.0157997
		0.918521		-0.139465	-0.0393934		0.0155713
		0.918662		-0.140026	-0.0396677		0.0155312
		0.918665		-0.141181	-0.0397172		0.0154475
		0.918682		-0.141207	-0.0398401		0.0149724
		0.918753		-0.14218	-0.0398833		0.0148682
		0.918808		-0.142609	-0.0399219		0.0142592
		0.918853		-0.14287	-0.0400608		0.014243
		0.918916		-0.143656	-0.0402747		0.013853
		0.919069		-0.144051	-0.0403086		0.0138115
		0.919158		-0.144759	-0.0403259		0.0136786
		0.919318		-0.146165	-0.0403582		0.0136315
		0.919505		-0.146799	-0.04063		0.0134947
		0.919544		-0.14687	-0.0407248		0.013484
		0.91957		-0.147401	-0.0407328		0.0134617
		0.919576		-0.147612	-0.0407379		0.0132999
		0.919636		-0.148115	-0.0407911		0.0132524
		0.919666		-0.148198	-0.0408315		0.0132521
		0.919921		-0.148555	-0.0409706		0.0131165
		0.91996		-0.148701	-0.0409881		0.0130808
		0.920009		-0.148728	-0.0409976		0.0130298
		0.920029		-0.148827	-0.041024		0.013021
		0.920052		-0.149162	-0.0411711		0.0129919
		0.920084		-0.149195	-0.0415652		0.0129718
		0.920164		-0.149868	-0.0418284		0.0124913
		0.920237		-0.149921	-0.0420593		0.0123731
		0.920341		-0.150149	-0.0423263		0.0123217
		0.920467		-0.150202	-0.0424574		0.0122809
		0.920613		-0.150511	-0.0427143		0.0122198
		0.920622		-0.15087	-0.0427572		0.01206
		0.920644		-0.151004	-0.0427584		0.011842
		0.920776		-0.151628	-0.0427685		0.011816
		0.920807		-0.151877	-0.0428823		0.0118104
		0.920952		-0.152072	-0.043005		0.0117638
		0.921128		-0.152766	-0.0430293		0.0116001
		0.921274		-0.152914	-0.0430664		0.0114185
		0.921349		-0.153192	-0.0432513		0.0111732
		0.921411		-0.154103	-0.0432604		0.0111653
		0.921424		-0.15421	-0.0436097		0.0111248
		0.921476		-0.154943	-0.0436741		0.0111201
		0.921546		-0.155329	-0.0437751		0.0110772
		0.921654		-0.156095	-0.0438425		0.0109319
		0.921694		-0.158762	-0.0438478		0.0107329
		0.921783		-0.15941	-0.0440618		0.0106015
		0.92179		-0.160324	-0.044067		0.0104665
		0.922038		-0.16069	-0.0441333		0.0102091
		0.922326		-0.161406	-0.0441744		0.0101433
		0.922356		-0.162647	-0.0444151		0.010141
		0.922549		-0.162765	-0.0444201		0.00991449
		0.922551		-0.162817	-0.0444354		0.00979224
		0.922612		-0.163298	-0.0444513		0.00978276
		0.922639		-0.163722	-0.0446134		0.00968387
		0.922739		-0.163961	-0.0447687		0.00948474
		0.922772		-0.164675	-0.0451076		0.00937098
		0.922837		-0.166431	-0.0451271		0.00927552
		0.922929		-0.167523	-0.0451573		0.00919938
		0.923031		-0.16775	-0.0456759		0.00911284
		0.923094		-0.16778	-0.0457175		0.00910304
		0.923102		-0.168911	-0.0459094		0.00903738
		0.923501		-0.169667	-0.0460089		0.00903679
		0.923551		-0.171055	-0.0460194		0.00894471
		0.923563		-0.171191	-0.0462882		0.00890632
		0.923566		-0.172228	-0.0463951		0.0087254
		0.923587		-0.172617	-0.046524		0.0086914
		0.923654		-0.173263	-0.0465277		0.00847851
		0.923866		-0.173825	-0.0465369		0.00836727
		0.923899		-0.173965	-0.0466018		0.00836092
		0.924011		-0.174192	-0.0466415		0.00830454
		0.924039		-0.174515	-0.0469267		0.00823971
		0.924044		-0.174609	-0.047166		0.00813317
		0.924051		-0.175333	-0.0473432		0.00806285
		0.924082		-0.175564	-0.0474896		0.00792586
		0.924095		-0.177418	-0.0476048		0.00753515
		0.924159		-0.177667	-0.0476077		0.00744755
		0.924217		-0.177879	-0.0478128		0.0073707
		0.924302		-0.178132	-0.0478131		0.00725341
		0.924313		-0.179584	-0.04783		0.00718672
		0.924353		-0.179798	-0.0480187		0.00717941
		0.924493		-0.180238	-0.0483974		0.00700175
		0.924568		-0.180715	-0.0484033		0.00679788
		0.924577		-0.180875	-0.0484623		0.00673812
		0.924644		-0.181828	-0.0485726		0.00669938
		0.924687		-0.182612	-0.0485795		0.00667639
		0.92497		-0.18331	-0.0486802		0.00632422
		0.925223		-0.183487	-0.0487221		0.0063082
		0.925303		-0.183806	-0.0488045		0.0061427
		0.925415		-0.185615	-0.0488051		0.0060457
		0.925435		-0.186532	-0.0488228		0.00585022
		0.925595		-0.186536	-0.0489046		0.00573434
		0.925596		-0.187169	-0.0489288		0.00550542
		0.92574		-0.187271	-0.0490796		0.00530884
		0.925804		-0.188224	-0.0491207		0.00522975
		0.925813		-0.188978	-0.0491913		0.00519843
		0.925854		-0.189545	-0.0495573		0.00495296
		0.925864		-0.189602	-0.0495985		0.00487128
		0.925896		-0.190899	-0.0496034		0.0048381
		0.926044		-0.193998	-0.0498817		0.00481272
		0.926065		-0.195433	-0.0498999		0.0047955
		0.926086		-0.197141	-0.0499811		0.00479174
		0.926181		-0.197286	-0.0499984		0.00473012
		0.926223		-0.197532	-0.0500741		0.00455994
		0.926308		-0.197585	-0.050243		0.0043467
		0.926338		-0.199102	-0.0502469		0.00434331
		0.926378		-0.199444	-0.0502947		0.00421897
		0.926426		-0.199857	-0.0503312		0.00416799
		0.926598		-0.200243	-0.0503463		0.00406117
		0.926609		-0.200748	-0.0505897		0.00404013
		0.926686		-0.200907	-0.0506464		0.00393939
		0.92671		-0.204512	-0.0508156		0.00392517
		0.926747		-0.20472	-0.0508238		0.00381552
		0.926797		-0.205574	-0.0508249		0.00377233
		0.926812		-0.206939	-0.0508557		0.00352915
		0.926817		-0.207893	-0.0509738		0.00350675
		0.92689		-0.208332	-0.051008		0.0031706
		0.926946		-0.208589	-0.0510444		0.00299157
		0.926949		-0.208782	-0.0511197		0.00298575
		0.926965		-0.208923	-0.0513245		0.00293703
		0.927002		-0.209296	-0.0513895		0.00283617
		0.927049		-0.209712	-0.0514852		0.00274213
		0.92708		-0.209787	-0.0514862		0.00255822
		0.927111		-0.21183	-0.0515711		0.00252534
		0.927157		-0.211857	-0.0516701		0.00250233
		0.92719		-0.211956	-0.0519203		0.00248522
		0.927355		-0.212411	-0.0522951		0.00235252
		0.927389		-0.214569	-0.0524556		0.00214709
		0.927404		-0.216009	-0.0524806		0.00211597
		0.927482		-0.216337	-0.0525264		0.00210946
		0.927531		-0.217489	-0.0525673		0.00198385
		0.927597		-0.218205	-0.0527711		0.00197301
		0.927609		-0.219215	-0.0527765		0.00181669
		0.927623		-0.219504	-0.0528306		0.00169367
		0.927781		-0.220001	-0.0529947		0.00153729
		0.927818		-0.220286	-0.0530219		0.00141327
		0.927819		-0.221008	-0.0532266		0.00123888
		0.927895		-0.221048	-0.0532739		0.00119311
		0.928288		-0.222048	-0.0537498		0.00103023
		0.92837		-0.222465	-0.0537834		0.00081221
		0.928414		-0.22249	-0.0537899		0.000550643
		0.928544		-0.222609	-0.0538733		0.000449048
		0.928714		-0.223054	-0.054141		0.000167583
		0.928756		-0.223235	-0.0543333		-0.000169766
		0.928907		-0.224191	-0.0543644		-0.000250068
		0.928923		-0.224352	-0.054412		-0.000554003
		0.928978		-0.224405	-0.054525		-0.00061063
		0.929109		-0.22557	-0.0547021		-0.000637464
		0.929141		-0.226201	-0.054956		-0.000657143
		0.929143		-0.226333	-0.055045		-0.000747113
		0.929371		-0.226738	-0.0550738		-0.00107247
		0.929376		-0.227863	-0.0552601		-0.0011106
		0.92946		-0.229249	-0.0554298		-0.00138873
		0.929491		-0.229669	-0.0555429		-0.00178095
		0.929541		-0.230578	-0.0555985		-0.00184227
		0.929568		-0.230695	-0.0556754		-0.00196841
		0.929588		-0.231131	-0.0560603		-0.00210789
		0.929679		-0.231666	-0.05629		-0.00213995
		0.929685		-0.231739	-0.0563157		-0.00221981
		0.929686		-0.231961	-0.056417		-0.00222869
		0.929742		-0.232183	-0.0565593		-0.00226491
		0.929765		-0.232479	-0.0565647		-0.00245138
		0.929817		-0.232835	-0.056587		-0.00251722
		0.929899		-0.233163	-0.0567681		-0.00261838
		0.929987		-0.233252	-0.0569191		-0.00267855
		0.930024		-0.233987	-0.0569706		-0.00272911
		0.930073		-0.234406	-0.0569808		-0.00277381
		0.930084		-0.235509	-0.0571398		-0.00296104
		0.930268		-0.235557	-0.0571945		-0.0030662
		0.930276		-0.23658	-0.0573287		-0.00319666
		0.930294		-0.238041	-0.0577506		-0.0032179
		0.930376		-0.238128	-0.0577837		-0.00324993
		0.93049		-0.239543	-0.0580776		-0.00325951
		0.930553		-0.240091	-0.0583184		-0.00329307
		0.930642		-0.240271	-0.0583973		-0.00345291
		0.930708		-0.240401	-0.0584088		-0.00362867
		0.930762		-0.242079	-0.0584326		-0.00375606
		0.930783		-0.243442	-0.0584971		-0.00381512
		0.930918		-0.243832	-0.0585913		-0.00392168
		0.931047		-0.245073	-0.0586348		-0.00392489
		0.931065		-0.245417	-0.0586828		-0.00409121
		0.931147		-0.245443	-0.0588289		-0.00410009
		0.931351		-0.246167	-0.0588419		-0.00417475
		0.93136		-0.247374	-0.058908		-0.00422376
		0.931617		-0.247937	-0.05896		-0.00423815
		0.931684		-0.24879	-0.0593942		-0.00440787
		0.931703		-0.249141	-0.0603644		-0.00443418
		0.931714		-0.249215	-0.0604312		-0.00448748
		0.931748		-0.249297	-0.0605639		-0.00456931
		0.931792		-0.250007	-0.0605809		-0.00466069
		0.931817		-0.250234	-0.0605917		-0.00470604
		0.931818		-0.250283	-0.0606118		-0.00480464
		0.931871		-0.251205	-0.0606833		-0.00487126
		0.931883		-0.251675	-0.0607517		-0.00489722
		0.931948		-0.252568	-0.0607681		-0.00522722
		0.932046		-0.252619	-0.0608766		-0.00531951
		0.932141		-0.252709	-0.0609233		-0.0053575
		0.932276		-0.25327	-0.0610186		-0.00538355
		0.932301		-0.253645	-0.061215		-0.00538554
		0.932316		-0.254233	-0.0613074		-0.0055267
		0.932438		-0.254398	-0.0614133		-0.00561945
		0.932575		-0.254511	-0.0614273		-0.00562812
		0.932629		-0.255146	-0.0616558		-0.00583879
		0.932634		-0.256484	-0.0620729		-0.00588637
		0.932835		-0.256835	-0.0621298		-0.00592958
		0.932961		-0.257269	-0.062182		-0.00621556
		0.932991		-0.25829	-0.0623555		-0.00627972
		0.933023		-0.258336	-0.0623846		-0.00630297
		0.933119		-0.258713	-0.06253		-0.00631725
		0.933121		-0.258833	-0.0628266		-0.00640451
		0.933138		-0.262519	-0.062929		-0.00643879
		0.933163		-0.264078	-0.0629592		-0.00649783
		0.933219		-0.264186	-0.063025		-0.0065542
		0.933291		-0.264759	-0.0630303		-0.00677073
		0.933341		-0.265315	-0.0630748		-0.00684775
		0.933398		-0.265928	-0.063115		-0.00688013
		0.933516		-0.265941	-0.0632425		-0.00688254
		0.933683		-0.266026	-0.0632616		-0.00689479
		0.933723		-0.266063	-0.0632855		-0.00691064
		0.933745		-0.268559	-0.0633655		-0.00702786
		0.933793		-0.26915	-0.0633834		-0.0071216
		0.93386		-0.269244	-0.0635183		-0.00721985
		0.934036		-0.269986	-0.0635221		-0.007276
		0.934132		-0.270341	-0.0635241		-0.00740794
		0.934227		-0.271172	-0.0635571		-0.00745231
		0.934361		-0.271366	-0.0638417		-0.00754618
		0.934566		-0.271599	-0.0639672		-0.00788723
		0.934706		-0.27327	-0.0639949		-0.00792548
		0.934732		-0.27496	-0.0639977		-0.00815043
		0.934784		-0.280153	-0.064271		-0.00821713
		0.935062		-0.280444	-0.0643095		-0.00840984
		0.935078		-0.280919	-0.0643425		-0.00850426
		0.935224		-0.281417	-0.064508		-0.00868555
		0.935357		-0.282022	-0.0647781		-0.00875887
		0.935362		-0.284111	-0.0648179		-0.00881722
		0.935441		-0.285494	-0.064825		-0.00890489
		0.935538		-0.285625	-0.0649754		-0.00890654
		0.935634		-0.28869	-0.0651734		-0.00892632
		0.935749		-0.291242	-0.0652007		-0.0089773
		0.93578		-0.292611	-0.0652601		-0.00899438
		0.935799		-0.293951	-0.0652805		-0.00900122
		0.935955		-0.294873	-0.0653977		-0.00906454
		0.935975		-0.29505	-0.0658952		-0.00939227
		0.936107		-0.298885	-0.0659674		-0.00947325
		0.936371		-0.301557	-0.0661399		-0.00989668
		0.936525		-0.30371	-0.0661622		-0.00991327
		0.936569		-0.304907	-0.0662556		-0.00996499
		0.936639		-0.305613	-0.0662646		-0.00997453
		0.936684		-0.306744	-0.0663363		-0.0100649
		0.93669		-0.30694	-0.0663766		-0.0101965
		0.936778		-0.308059	-0.0665347		-0.0102424
		0.936789		-0.310367	-0.0666098		-0.0104696
		0.936791		-0.311254	-0.0666277		-0.0106022
		0.936847		-0.313019	-0.0666788		-0.0106073
		0.936979		-0.314241	-0.0666862		-0.01065
		0.937088		-0.316277	-0.066734		-0.0107388
		0.937121		-0.317423	-0.067021		-0.0109219
		0.937189		-0.322804	-0.0671749		-0.0111427
		0.937382		-0.324325	-0.0671807		-0.0111731
		0.937398		-0.326353	-0.0672773		-0.0112179
		0.937495		-0.326423	-0.0674744		-0.0115232
		0.937595		-0.32712	-0.0674952		-0.0117078
		0.937628		-0.33032	-0.0676009		-0.0117264
		0.937644		-0.331879	-0.0677182		-0.0117746
		0.937651		-0.333948	-0.0679718		-0.0118107
		0.937739		-0.339215	-0.0679736		-0.0119088
		0.937914		-0.340006	-0.0680951		-0.0120318
		0.93808		-0.341364	-0.0681381		-0.012104
		0.938143		-0.341435	-0.0681444		-0.0123065
		0.938185		-0.341465	-0.0683524		-0.012353
		0.938211		-0.342184	-0.0683597		-0.0123924
		0.938251		-0.344775	-0.0683978		-0.0124309
		0.938304		-0.345254	-0.0684073		-0.0124923
		0.938315		-0.346417	-0.0685142		-0.0129242
		0.938355		-0.347288	-0.0685505		-0.0129615
		0.938368		-0.349758	-0.0689467		-0.0130538
		0.93864		-0.350897	-0.0691697		-0.0130844
		0.939056		-0.351945	-0.0692513		-0.0130898
		0.939243		-0.353344	-0.0692715		-0.0131223
		0.939279		-0.354327	-0.0696528		-0.013264
		0.939314		-0.359331	-0.06974		-0.0132843
		0.939412		-0.359332	-0.0701001		-0.013393
		0.939493		-0.35986	-0.0701436		-0.0135271
[truncated: 2,139 more rows]
