# Supplementary material for: Tight bending of the Ndc80 complex provides intrinsic regulation of its binding to microtubules
Source: eLife. 2019 May 2;8:e44489. doi: 10.7554/eLife.44489 (PMC6516834; doi:10.7554/eLife.44489)
Supplement: Figure 4—figure supplement 2—source data 1. [file elife-44489-fig4-figsupp2-data1.xlsx]

## Sheet: Sheet1
Figure 4-figure supplement 1-source data 1		4 days, 6 slides	2 days, 3 slides	2 days, 3 slides	2 days, 3 slides
corrected FRET values within histograms		Ndc80 Nuf2 S2C Spc25 S154C	Ndc80 Nuf2 S2C Spc24 N185C	Ndc80 Nuf2 Q74C Spc24 N185C	Ndc80 Nuf2 Q74C Spc25 S154C
		1.1681	4.63775	0.975778	39.2578
		1.1266	4.62806	0.966207	2.24403
		1.11795	3.57447	0.956799	1.0981
		1.11671	3.21788	0.948657	1.0705
		1.10166	1.88588	0.938459	1.02047
		1.07816	1.56536	0.935508	1.01716
		1.0755	1.2424	0.932687	1.0064
		1.0691	1.19416	0.929504	1.0044
		1.06809	1.1913	0.924574	0.996618
		1.06687	1.16752	0.92357	0.994667
		1.06496	1.16081	0.923503	0.993661
		1.05791	1.15904	0.920798	0.993444
		1.05675	1.14943	0.919648	0.990647
		1.05609	1.14719	0.919403	0.989348
		1.05563	1.14501	0.918677	0.983856
		1.05224	1.14399	0.917981	0.971493
		1.05093	1.13413	0.909599	0.970604
		1.04592	1.13322	0.904508	0.967153
		1.04379	1.12142	0.901983	0.966373
		1.03625	1.11924	0.901951	0.960074
		1.03536	1.1181	0.899419	0.955584
		1.03317	1.11677	0.892472	0.952696
		1.03245	1.11381	0.889694	0.951573
		1.03064	1.10935	0.888458	0.948554
		1.02884	1.10601	0.887027	0.948142
		1.02871	1.10494	0.882605	0.94776
		1.02585	1.09916	0.881351	0.945417
		1.02427	1.09804	0.871246	0.94094
		1.01932	1.09795	0.870183	0.940607
		1.01824	1.09557	0.868565	0.939943
		1.01647	1.08465	0.863242	0.939029
		1.0132	1.08239	0.862471	0.938867
		1.00906	1.07899	0.858227	0.9376
		1.00892	1.07507	0.856542	0.936828
		1.00854	1.07483	0.853147	0.932559
		1.00752	1.07341	0.849827	0.931635
		1.0066	1.0732	0.836661	0.929753
		1.00631	1.07312	0.83294	0.927791
		1.0029	1.06966	0.823489	0.92639
		1.00245	1.06651	0.819677	0.919605
		0.999136	1.06038	0.817422	0.919413
		0.997579	1.05788	0.813033	0.916865
		0.992406	1.05555	0.811799	0.913624
		0.992114	1.05165	0.811061	0.913426
		0.990875	1.0496	0.807206	0.910774
		0.990359	1.04595	0.797305	0.909043
		0.989659	1.04519	0.797187	0.908861
		0.988756	1.04514	0.796893	0.908735
		0.988296	1.04382	0.79162	0.908162
		0.988144	1.03909	0.788813	0.90484
		0.986805	1.02983	0.78764	0.904112
		0.986011	1.02586	0.779441	0.902159
		0.98556	1.01753	0.778407	0.900225
		0.983453	1.01729	0.771646	0.898302
		0.981241	1.01525	0.767595	0.89451
		0.981133	1.01518	0.762702	0.894239
		0.980682	1.01332	0.75768	0.893822
		0.980532	1.0093	0.749144	0.889
		0.97843	1.00667	0.744069	0.887555
		0.975761	1.00533	0.740727	0.887097
		0.974771	1.00342	0.739413	0.878511
		0.974223	1.0027	0.734696	0.871955
		0.973651	1.00138	0.731766	0.871872
		0.971861	1.00116	0.730272	0.87175
		0.969245	0.999017	0.729269	0.864971
		0.969084	0.996074	0.724622	0.863104
		0.966128	0.993543	0.72296	0.856948
		0.964905	0.991391	0.721274	0.856767
		0.964168	0.991336	0.72008	0.844054
		0.963142	0.990418	0.715624	0.842963
		0.957682	0.988522	0.715339	0.842739
		0.957414	0.984408	0.714693	0.842181
		0.956532	0.982944	0.714526	0.834767
		0.955807	0.972469	0.705497	0.822108
		0.955067	0.972293	0.698262	0.816011
		0.95399	0.970854	0.69014	0.806246
		0.952722	0.97022	0.685536	0.801001
		0.950265	0.966095	0.685391	0.796174
		0.949156	0.964684	0.684541	0.793985
		0.948573	0.96327	0.680498	0.792864
		0.947774	0.961069	0.679568	0.791338
		0.946814	0.961062	0.6752	0.788224
		0.945164	0.954967	0.671397	0.78499
		0.943321	0.954189	0.660738	0.784938
		0.943089	0.953482	0.660391	0.776473
		0.941562	0.953224	0.651756	0.776331
		0.939346	0.949331	0.635663	0.775558
		0.939081	0.94908	0.632297	0.768108
		0.937867	0.948545	0.60785	0.762026
		0.937655	0.948499	0.566018	0.75956
		0.937635	0.944769	0.546056	0.75784
		0.93395	0.940051	0.527901	0.757324
		0.933142	0.939428	0.527552	0.75267
		0.932212	0.938183	0.429172	0.741292
		0.931381	0.934091	0.381856	0.738799
		0.928463	0.929964	0.377302	0.735487
		0.926658	0.926203	0.360582	0.734257
		0.92022	0.925334	0.352533	0.733458
		0.916829	0.924996	0.324478	0.729388
		0.916518	0.924452	0.300039	0.727507
		0.915683	0.920237	0.298242	0.712478
		0.914009	0.918196	0.294877	0.707404
		0.909064	0.915325	0.291641	0.70628
		0.907867	0.913354	0.289879	0.705946
		0.904025	0.911476	0.278477	0.700812
		0.899606	0.910349	0.274752	0.696166
		0.891849	0.909548	0.272301	0.694581
		0.890427	0.908681	0.269877	0.690931
		0.887555	0.906368	0.264316	0.678858
		0.887474	0.901405	0.26307	0.678792
		0.880456	0.899273	0.258391	0.674995
		0.88019	0.898876	0.256346	0.673148
		0.879948	0.8977	0.255994	0.668498
		0.875734	0.897347	0.252308	0.666391
		0.873419	0.894307	0.249397	0.644819
		0.868645	0.893023	0.248708	0.642047
		0.864225	0.892103	0.246366	0.641207
		0.861959	0.891874	0.243769	0.63163
		0.854459	0.890581	0.241549	0.627156
		0.853328	0.888455	0.237913	0.626885
		0.846734	0.888166	0.237553	0.618395
		0.843939	0.886891	0.237305	0.617725
		0.837166	0.886436	0.236683	0.611124
		0.835845	0.88244	0.232874	0.604783
		0.833514	0.882258	0.231443	0.604702
		0.829439	0.881863	0.23042	0.601772
		0.829031	0.880581	0.228155	0.596239
		0.824055	0.880155	0.226927	0.594695
		0.821856	0.879612	0.225609	0.59131
		0.818426	0.8794	0.225448	0.589817
		0.813281	0.877896	0.22502	0.587348
		0.81195	0.874404	0.223423	0.581493
		0.811143	0.872991	0.219428	0.579692
		0.809942	0.86531	0.217543	0.579267
		0.807867	0.861239	0.215508	0.576325
		0.804377	0.861076	0.214442	0.573672
		0.80104	0.857943	0.213966	0.565419
		0.800986	0.856291	0.212277	0.564155
		0.794811	0.855185	0.209854	0.563105
		0.793365	0.854509	0.209442	0.560701
		0.787026	0.853929	0.207116	0.554848
		0.785744	0.85389	0.205141	0.550334
		0.783865	0.853634	0.198211	0.546306
		0.780836	0.850944	0.195999	0.545838
		0.780257	0.84707	0.194213	0.542994
		0.778513	0.844617	0.192828	0.532668
		0.777117	0.842807	0.19059	0.526762
		0.772204	0.839165	0.186688	0.520134
		0.771477	0.837035	0.186669	0.517154
		0.769637	0.836685	0.185446	0.512158
		0.769221	0.836457	0.184851	0.511516
		0.768264	0.836244	0.184326	0.509964
		0.768249	0.834342	0.184144	0.507585
		0.76409	0.832492	0.18194	0.505125
		0.763604	0.831849	0.179032	0.50399
		0.762355	0.830184	0.177855	0.501948
		0.759952	0.827284	0.174592	0.501221
		0.759234	0.825539	0.174578	0.497347
		0.758942	0.8222	0.173633	0.491333
		0.757667	0.819725	0.172644	0.483768
		0.75587	0.819556	0.170042	0.478685
		0.753616	0.818684	0.169358	0.477363
		0.753077	0.817575	0.167458	0.464268
		0.750128	0.817338	0.166259	0.459707
		0.748558	0.816965	0.161327	0.453263
		0.74599	0.816073	0.161223	0.439454
		0.743405	0.81336	0.159481	0.436828
		0.743048	0.810585	0.158293	0.436191
		0.741137	0.807618	0.155134	0.435698
		0.740211	0.806835	0.154987	0.43502
		0.739945	0.804211	0.154803	0.426568
		0.739055	0.800868	0.154604	0.418553
		0.738624	0.799772	0.154041	0.416857
		0.737363	0.797273	0.151465	0.415072
		0.737128	0.796521	0.151441	0.407947
		0.736865	0.794196	0.151218	0.402053
		0.731799	0.793975	0.150917	0.401187
		0.731648	0.787179	0.147334	0.39944
		0.728603	0.787159	0.145592	0.399424
		0.72858	0.786101	0.145039	0.396877
		0.727392	0.784708	0.144822	0.395395
		0.726734	0.784165	0.14244	0.394998
		0.726472	0.783031	0.142241	0.387779
		0.725303	0.78302	0.138369	0.378564
		0.720691	0.781598	0.138193	0.374733
		0.720341	0.779816	0.136864	0.373716
		0.720097	0.776779	0.131447	0.372838
		0.720067	0.776653	0.130517	0.367979
		0.718894	0.774788	0.130419	0.357203
		0.717003	0.774545	0.129412	0.353095
		0.711636	0.773664	0.127966	0.352451
		0.711582	0.772745	0.126647	0.33831
		0.7106	0.771702	0.126433	0.337674
		0.706325	0.769956	0.126273	0.337241
		0.704178	0.768782	0.125585	0.331337
		0.703652	0.768687	0.125401	0.329894
		0.702266	0.767544	0.124662	0.329883
		0.701049	0.767017	0.124527	0.329579
		0.698602	0.766951	0.123044	0.329249
		0.698153	0.766487	0.122963	0.325545
		0.695572	0.766197	0.121908	0.313274
		0.693825	0.766142	0.121813	0.309754
		0.693254	0.76451	0.121738	0.30965
		0.692581	0.763995	0.121013	0.308672
		0.690999	0.763376	0.120837	0.307979
		0.686647	0.761133	0.120509	0.305895
		0.685824	0.759757	0.119908	0.30567
		0.685199	0.757509	0.119906	0.29197
		0.682202	0.756706	0.119752	0.287451
		0.681446	0.756219	0.118885	0.28594
		0.680074	0.752932	0.118109	0.284715
		0.679457	0.752715	0.117921	0.284509
		0.677272	0.752471	0.117241	0.28282
		0.671965	0.751506	0.116026	0.278854
		0.670426	0.751163	0.115965	0.277153
		0.669633	0.750857	0.115425	0.277025
		0.66842	0.750158	0.11429	0.276211
		0.667553	0.748597	0.111343	0.275422
		0.664033	0.748381	0.111044	0.266149
		0.660579	0.748225	0.109642	0.24444
		0.660099	0.74806	0.109598	0.243533
		0.659799	0.746871	0.109519	0.241661
		0.658484	0.746409	0.109366	0.230367
		0.658193	0.745795	0.109015	0.227449
		0.655578	0.744568	0.10828	0.224209
		0.654484	0.744133	0.108151	0.214456
		0.653735	0.744103	0.107778	0.213917
		0.650879	0.743942	0.107642	0.194509
		0.650452	0.743361	0.107614	0.189693
		0.64653	0.743116	0.106771	0.182355
		0.64632	0.742514	0.105995	0.181326
		0.645264	0.740172	0.105169	0.176391
		0.643053	0.734433	0.104969	0.174444
		0.64159	0.734318	0.10489	0.171632
		0.641216	0.734178	0.103531	0.170917
		0.640231	0.732352	0.102292	0.158821
		0.638219	0.731988	0.102184	0.157999
		0.637729	0.731321	0.101985	0.156821
		0.63764	0.728864	0.101543	0.146643
		0.637405	0.728123	0.100766	0.145985
		0.637054	0.724992	0.0999002	0.137605
		0.635699	0.722712	0.0993175	0.134891
		0.634424	0.720715	0.0990994	0.123342
		0.631573	0.720662	0.098354	0.116802
		0.631426	0.720039	0.0982051	0.114832
		0.631014	0.718289	0.0978803	0.113953
		0.63045	0.71794	0.0968908	0.112912
		0.629525	0.717725	0.0964451	0.108713
		0.628827	0.71707	0.0961806	0.103371
		0.627738	0.716512	0.0960033	0.101913
		0.626161	0.716104	0.0949957	0.101744
		0.625457	0.715268	0.0949374	0.101143
		0.625282	0.714274	0.0941324	0.0998189
		0.624277	0.713768	0.0941281	0.0927738
		0.624033	0.712002	0.0940247	0.0899873
		0.623439	0.710943	0.0937693	0.088049
		0.623372	0.707972	0.0934071	0.0845466
		0.6191	0.70759	0.0933479	0.081262
		0.617745	0.704725	0.0926314	0.0811249
		0.617257	0.700325	0.0925183	0.0788876
		0.615236	0.695835	0.0916425	0.0779562
		0.614998	0.692457	0.0912475	0.0726195
		0.612698	0.692309	0.0911948	0.0705746
		0.609308	0.690093	0.0908955	0.0701725
		0.602956	0.689178	0.09058	0.0697829
		0.602177	0.688302	0.0903505	0.0696981
		0.600937	0.68675	0.0897491	0.069309
		0.600804	0.686037	0.0896819	0.0672299
		0.600087	0.685774	0.0880815	0.0653212
		0.599632	0.685687	0.0876218	0.0647866
		0.597232	0.685295	0.0876109	0.0643842
		0.59136	0.685222	0.0875481	0.0642902
		0.586905	0.683597	0.0872365	0.0642312
		0.585825	0.68153	0.0870891	0.0633584
		0.581992	0.681023	0.0852732	0.0629298
		0.581901	0.680348	0.0852162	0.0592406
		0.581078	0.68019	0.0847044	0.0589463
		0.580436	0.679856	0.084616	0.0582142
		0.580167	0.679413	0.0828391	0.0578503
		0.579753	0.678635	0.082556	0.0554475
		0.579422	0.677268	0.0819891	0.0550973
		0.578783	0.677152	0.0819698	0.052238
		0.577166	0.675464	0.0817364	0.052068
		0.57583	0.673473	0.0806644	0.0506123
		0.57306	0.668617	0.0805931	0.0502532
		0.571586	0.667849	0.07975	0.0492289
		0.570607	0.667533	0.0793188	0.0483575
		0.570572	0.667403	0.0790299	0.0479415
		0.570247	0.666678	0.0789127	0.0473159
		0.569146	0.663107	0.0784715	0.0455103
		0.568379	0.663093	0.0778952	0.0453117
		0.566698	0.662188	0.0778452	0.0434359
		0.564606	0.662017	0.0778047	0.0406649
		0.564595	0.661813	0.0777034	0.0405128
		0.564168	0.660663	0.0764862	0.0391553
		0.561628	0.659732	0.076377	0.0391231
		0.561033	0.656868	0.0752202	0.0358999
		0.559286	0.651692	0.0748151	0.0337846
		0.558543	0.64751	0.0747905	0.0335739
		0.558351	0.647016	0.0744829	0.0324289
		0.557444	0.646382	0.0736533	0.0323006
		0.557162	0.643633	0.0731167	0.0322406
		0.556402	0.639851	0.0729296	0.0303669
		0.553861	0.638352	0.0729127	0.028978
		0.553194	0.635526	0.0728835	0.0288462
		0.553083	0.634976	0.0721374	0.0282951
		0.552709	0.633119	0.0719318	0.027651
		0.552603	0.631828	0.071793	0.0272805
		0.551872	0.631565	0.0717007	0.0240892
		0.551289	0.628697	0.0716397	0.023347
		0.549598	0.626948	0.0715498	0.0222872
		0.548181	0.626005	0.071452	0.0219665
		0.548071	0.625877	0.0708383	0.0207164
		0.54389	0.625256	0.06992	0.0192086
		0.541723	0.624943	0.068803	0.0187417
		0.541133	0.624754	0.0686233	0.0183856
		0.540308	0.618419	0.0685814	0.01734
		0.539166	0.616655	0.0685522	0.0150473
		0.539096	0.612278	0.0685455	0.0149494
		0.538995	0.611677	0.0683458	0.01459
		0.537797	0.609423	0.06828	0.0125755
		0.537144	0.609329	0.0680329	0.0124469
		0.536687	0.608977	0.0677845	0.0124396
		0.534797	0.604527	0.0674899	0.0120268
		0.534373	0.60042	0.0674043	0.0114811
		0.533805	0.600333	0.0666061	0.0102744
		0.533669	0.599513	0.0664372	0.0100296
		0.532884	0.599352	0.0662055	0.00828416
		0.532748	0.599127	0.0660765	0.00813037
		0.532275	0.598606	0.0655599	0.00768338
		0.531646	0.592986	0.0654614	0.00738343
		0.531408	0.591821	0.0649255	0.00693511
		0.530459	0.589999	0.0648213	0.0055893
		0.529485	0.589367	0.0647268	0.00462656
		0.529369	0.58916	0.0646227	0.00407813
		0.52908	0.588832	0.063754	0.00404961
		0.528717	0.586879	0.0636085	0.00355405
		0.527901	0.586827	0.0635721	0.00333941
		0.527282	0.586741	0.0633645	0.00315619
		0.525222	0.582623	0.0629828	0.00249195
		0.524362	0.581424	0.0627181	0.00233821
		0.524146	0.581197	0.0626334	0.00144253
		0.523027	0.57927	0.0624613	0.00111832
		0.521609	0.576151	0.0624393	0.000621103
		0.518887	0.575325	0.0623202	0.000211954
		0.518593	0.574517	0.0619223	2.44e-06
		0.518403	0.574021	0.0616464	-0.000714844
		0.514593	0.572884	0.0615999	-0.00099129
		0.513047	0.57274	0.0612989	-0.00198815
		0.512813	0.571923	0.061085	-0.00211307
		0.512298	0.570665	0.060989	-0.00287977
		0.51019	0.570055	0.0609805	-0.00333179
		0.505261	0.569284	0.0609067	-0.00369597
		0.504547	0.566146	0.0605997	-0.00380425
		0.503525	0.565297	0.0603218	-0.00383731
		0.502544	0.564049	0.0602767	-0.00406042
		0.498179	0.563372	0.0602361	-0.00410285
		0.497652	0.560968	0.0600571	-0.00567267
		0.496131	0.555156	0.0599602	-0.00624281
		0.495608	0.552382	0.0593956	-0.00636954
		0.494925	0.548577	0.0590571	-0.00714168
		0.494691	0.547889	0.058492	-0.00725864
		0.493376	0.546689	0.0578971	-0.00762226
		0.493133	0.546162	0.0578725	-0.00903805
		0.492421	0.545907	0.0566406	-0.00950353
		0.490847	0.545079	0.0565432	-0.00996904
		0.490502	0.543026	0.0563171	-0.0101117
		0.489908	0.540039	0.0563111	-0.010114
		0.487954	0.538948	0.0561866	-0.0105485
		0.48778	0.538693	0.055956	-0.0120714
		0.486966	0.537243	0.0557824	-0.0131166
		0.486328	0.536548	0.0556622	-0.0133566
		0.485688	0.535941	0.0555155	-0.0135144
		0.48209	0.535262	0.0553467	-0.013675
		0.47994	0.534978	0.0552366	-0.0139473
		0.479844	0.533712	0.0550982	-0.0141413
		0.479141	0.533396	0.0549431	-0.0141584
		0.478952	0.53154	0.0546636	-0.014889
		0.476797	0.52918	0.0545855	-0.0152888
		0.475732	0.52753	0.0543836	-0.015392
		0.475047	0.526378	0.0541902	-0.0154836
		0.472786	0.525305	0.0539582	-0.0155438
		0.470434	0.52246	0.0538905	-0.0156509
		0.470062	0.520805	0.0537582	-0.016003
		0.469827	0.517965	0.0534898	-0.0160266
		0.468986	0.515876	0.0528933	-0.0161556
		0.465676	0.515311	0.0528409	-0.0162525
		0.464944	0.514969	0.0521115	-0.0168311
		0.462046	0.514495	0.0519263	-0.0168942
		0.460552	0.513915	0.051825	-0.0170751
		0.459929	0.513638	0.0517809	-0.0172196
		0.457485	0.51225	0.0517089	-0.0172818
		0.45541	0.511766	0.051638	-0.0179707
		0.454217	0.510527	0.0512425	-0.0180094
		0.453694	0.509702	0.0510644	-0.0181349
		0.4536	0.508809	0.0510395	-0.0182497
		0.446418	0.507844	0.0510047	-0.018446
		0.445063	0.507389	0.0507345	-0.0184788
		0.443462	0.507357	0.0502344	-0.0204568
		0.439469	0.506457	0.0502291	-0.0211142
		0.437461	0.505555	0.0500003	-0.021149
		0.437169	0.504559	0.0497571	-0.0224351
		0.436728	0.504271	0.0495709	-0.0225039
		0.434828	0.504028	0.0495205	-0.0227767
		0.43311	0.500142	0.0492147	-0.0228298
		0.431452	0.499161	0.0491786	-0.022879
		0.428424	0.498115	0.0490091	-0.0229305
		0.428382	0.495887	0.0488492	-0.0231053
		0.427842	0.492699	0.0485564	-0.0238792
		0.426999	0.491912	0.0485357	-0.0243545
		0.426293	0.49177	0.0480871	-0.0243972
		0.421353	0.491364	0.0479908	-0.0249336
		0.41496	0.490993	0.0475353	-0.0250308
		0.414159	0.490768	0.0472628	-0.025394
		0.413496	0.489201	0.0472403	-0.0261222
		0.413453	0.486607	0.0472003	-0.026254
		0.409116	0.48598	0.0470893	-0.0267133
		0.407954	0.485876	0.0469214	-0.0273943
		0.405975	0.485393	0.0464046	-0.0275492
		0.405355	0.484299	0.0461277	-0.0276132
		0.404973	0.484184	0.0461217	-0.0280529
		0.404329	0.483866	0.0454555	-0.028152
		0.404187	0.483711	0.0452691	-0.0284595
		0.402687	0.482559	0.0445962	-0.0285648
		0.402632	0.481383	0.0444637	-0.0285835
		0.401125	0.480936	0.0443005	-0.0288441
		0.398569	0.480516	0.0441152	-0.0293013
		0.398564	0.479614	0.0440481	-0.0297291
		0.398401	0.477845	0.0438486	-0.0297769
		0.397764	0.476427	0.0434577	-0.0299058
		0.397666	0.4754	0.0433696	-0.0299079
		0.397562	0.475102	0.0431853	-0.031017
		0.396404	0.474097	0.0427607	-0.0311152
		0.394551	0.472491	0.0420046	-0.031202
		0.393807	0.47119	0.041774	-0.0314456
		0.393218	0.469863	0.0415228	-0.0316866
		0.392394	0.469011	0.041319	-0.0322528
		0.392326	0.468808	0.040844	-0.032875
		0.390715	0.468543	0.0406617	-0.0335339
		0.389473	0.467666	0.0406014	-0.0337018
		0.389059	0.467638	0.0405596	-0.0346587
		0.388423	0.46613	0.0402967	-0.0352162
		0.388181	0.463012	0.0401989	-0.0355345
		0.3827	0.461979	0.0400496	-0.0365325
		0.380492	0.461868	0.0398897	-0.0367408
		0.378576	0.461865	0.0398707	-0.0367856
		0.376595	0.460846	0.0398408	-0.0374098
		0.37293	0.458927	0.0393495	-0.0378184
		0.372474	0.458902	0.0384749	-0.0379754
		0.370092	0.457351	0.0382405	-0.0380693
		0.369217	0.457133	0.0381466	-0.0384842
		0.368404	0.456861	0.0378857	-0.0386182
		0.364335	0.456445	0.0375109	-0.0389178
		0.364262	0.455903	0.0373555	-0.0390829
		0.363374	0.454563	0.0371317	-0.0391442
		0.362924	0.452085	0.0370839	-0.0397927
		0.362435	0.451065	0.0369159	-0.0400409
		0.361691	0.4508	0.0362506	-0.0404829
		0.361536	0.450139	0.0362038	-0.0407237
		0.361176	0.447962	0.0360211	-0.0411862
		0.360082	0.447236	0.0358774	-0.0412111
		0.357978	0.446308	0.0358669	-0.0415444
		0.355671	0.445615	0.0354838	-0.0417164
		0.35517	0.444794	0.0353016	-0.0417257
		0.354831	0.444646	0.0352157	-0.0420409
		0.352095	0.443613	0.0349583	-0.0422375
		0.351466	0.443083	0.034948	-0.0422574
		0.351101	0.442744	0.0348762	-0.0436942
		0.350998	0.440887	0.0347681	-0.0437162
		0.350616	0.440215	0.0347138	-0.0439808
		0.350022	0.438861	0.034562	-0.0440134
		0.348902	0.438228	0.0345468	-0.0443132
		0.347981	0.438078	0.0345237	-0.0446096
		0.346172	0.437066	0.0344846	-0.0447431
		0.345734	0.437042	0.0342013	-0.0450946
		0.345111	0.436519	0.0337481	-0.0451552
		0.344041	0.433797	0.0336249	-0.0455721
		0.338621	0.432859	0.0334976	-0.045695
		0.338099	0.431172	0.0333832	-0.0457198
		0.337968	0.4309	0.0331753	-0.0459708
		0.336634	0.429965	0.033148	-0.0460721
		0.336377	0.429139	0.0330212	-0.046113
		0.335209	0.428621	0.0328032	-0.0463808
		0.332236	0.426287	0.0327336	-0.0467568
		0.331704	0.423775	0.0322012	-0.0468162
		0.330747	0.423389	0.0319967	-0.0473873
		0.330461	0.421897	0.0314175	-0.0474875
		0.33018	0.420622	0.0312932	-0.0475224
		0.329445	0.42029	0.0312599	-0.0480155
		0.328739	0.419149	0.0312385	-0.0482431
		0.327988	0.418727	0.0311028	-0.0488591
		0.32793	0.417027	0.0310924	-0.0489731
		0.324713	0.411648	0.0310576	-0.0490094
		0.323116	0.410516	0.0307718	-0.049169
		0.320607	0.40874	0.030624	-0.0500535
		0.32039	0.406654	0.0304931	-0.0500549
		0.320207	0.405546	0.0304657	-0.0501155
		0.320024	0.405207	0.0304347	-0.0501593
		0.319507	0.40497	0.0302763	-0.0504646
		0.319429	0.402746	0.0302431	-0.0504686
		0.318838	0.400443	0.0299628	-0.0506164
		0.318822	0.4002	0.0299117	-0.0515188
		0.314427	0.399894	0.0298749	-0.0519363
		0.313832	0.399792	0.0296112	-0.0520214
		0.312785	0.399659	0.0293777	-0.0525188
		0.312205	0.397744	0.0291492	-0.0529157
		0.310218	0.394198	0.0290931	-0.0530153
		0.309432	0.392516	0.0287448	-0.053104
		0.308165	0.390303	0.0286556	-0.0533811
		0.306408	0.389694	0.0286493	-0.0534329
		0.305512	0.388704	0.0281582	-0.0538179
		0.304992	0.38839	0.0280649	-0.0538323
		0.304012	0.388054	0.0280337	-0.0539131
		0.30331	0.387615	0.0276528	-0.0539135
		0.301429	0.387075	0.0275903	-0.054627
		0.300877	0.384786	0.0275856	-0.0549694
		0.300692	0.382919	0.0275475	-0.0550954
		0.299046	0.382598	0.0275099	-0.0555764
		0.297453	0.381845	0.0275002	-0.055728
		0.296012	0.377551	0.0273825	-0.0557405
		0.295975	0.37742	0.0271527	-0.0561277
		0.294598	0.375376	0.0271122	-0.0564707
		0.29386	0.374937	0.027072	-0.0566592
		0.29372	0.373629	0.0268671	-0.0567331
		0.29369	0.372674	0.0268068	-0.0570804
		0.293415	0.370674	0.0268061	-0.0572982
		0.293154	0.369503	0.0264363	-0.0573873
		0.292954	0.369141	0.0264278	-0.0577392
		0.292738	0.368136	0.0262731	-0.0579094
		0.291207	0.368076	0.0260542	-0.0582869
		0.290691	0.36682	0.0259131	-0.058971
		0.290431	0.365673	0.0256666	-0.0596005
		0.287501	0.364961	0.0251723	-0.0596864
		0.285758	0.363072	0.0250558	-0.0597623
		0.285303	0.362953	0.0249935	-0.0597699
		0.284752	0.360355	0.0247148	-0.0601321
		0.284279	0.35892	0.0247085	-0.0604086
		0.282823	0.358675	0.0244904	-0.0611982
		0.282698	0.358484	0.0242479	-0.061375
		0.281751	0.357997	0.0242249	-0.0616605
		0.280685	0.357908	0.0240879	-0.061948
		0.280064	0.357607	0.0238481	-0.0626692
		0.279658	0.353922	0.0238188	-0.0628802
		0.279008	0.35123	0.0237993	-0.063422
		0.278691	0.351104	0.0235727	-0.0634556
		0.277891	0.350755	0.0234278	-0.0639234
		0.276746	0.349645	0.0233466	-0.0644179
		0.275638	0.349262	0.0233069	-0.0644696
		0.275539	0.348311	0.0232388	-0.0646626
		0.274958	0.347894	0.0232385	-0.0647313
		0.274789	0.346608	0.0232265	-0.064925
		0.274391	0.345375	0.0231053	-0.0651229
		0.272502	0.341197	0.0230517	-0.0656956
		0.268786	0.338631	0.0228718	-0.0659253
		0.268578	0.338022	0.0228221	-0.066219
		0.26838	0.337731	0.0228076	-0.0662309
		0.268282	0.33449	0.0225734	-0.0665423
		0.26827	0.332857	0.0224394	-0.0665571
		0.268166	0.33054	0.0221141	-0.0669687
		0.266986	0.325328	0.0218116	-0.0672987
		0.266072	0.322121	0.0216698	-0.0676085
		0.264058	0.32179	0.0215757	-0.0679256
		0.263871	0.31927	0.0215418	-0.068227
		0.262157	0.319092	0.021402	-0.0683549
		0.261345	0.318448	0.0213242	-0.068397
		0.260356	0.3135	0.0212908	-0.0684432
		0.257818	0.312491	0.0212283	-0.0687263
		0.257568	0.312084	0.0211888	-0.0689521
		0.257536	0.311954	0.0210434	-0.0693769
		0.257308	0.310386	0.0209186	-0.0693997
		0.257218	0.310169	0.0207184	-0.069635
		0.256588	0.309538	0.0205751	-0.0698246
		0.255976	0.306764	0.0205555	-0.0701713
		0.255902	0.306226	0.0198988	-0.0701893
		0.253305	0.304171	0.0198905	-0.0703665
		0.252652	0.303536	0.0194661	-0.0706188
		0.252085	0.302412	0.0194661	-0.0707259
		0.251711	0.302137	0.0188044	-0.0708752
		0.251218	0.300438	0.0187917	-0.0709194
		0.251074	0.298823	0.0185564	-0.0709786
		0.250469	0.297472	0.0184741	-0.07154
		0.250128	0.296509	0.0184116	-0.0718457
		0.249463	0.293726	0.0182406	-0.0720093
		0.249328	0.291902	0.0179065	-0.0721474
		0.248615	0.29034	0.0178457	-0.0723672
		0.248329	0.288816	0.017713	-0.0724151
		0.247033	0.288414	0.0176671	-0.0724943
		0.246968	0.286587	0.0175896	-0.0726562
		0.246171	0.285643	0.0175818	-0.0727329
		0.246027	0.285307	0.0174993	-0.0730153
		0.245637	0.283529	0.0174537	-0.0732529
		0.245545	0.28063	0.0172975	-0.0736825
		0.245327	0.279336	0.0171044	-0.0742146
		0.24495	0.274084	0.0171	-0.0742899
		0.243651	0.270121	0.0167005	-0.0744022
		0.243018	0.267455	0.0166658	-0.0746333
		0.242217	0.265469	0.0164783	-0.07506
		0.241215	0.260202	0.0162642	-0.0755311
		0.240535	0.259104	0.0160479	-0.0757146
		0.238264	0.258168	0.0159155	-0.0757278
		0.237051	0.256273	0.0156761	-0.0759524
		0.236947	0.254849	0.0156445	-0.0761463
		0.236603	0.254653	0.015487	-0.0762336
		0.236433	0.25437	0.0151369	-0.076246
		0.236059	0.253687	0.0151351	-0.076286
		0.235558	0.252385	0.0149869	-0.0763095
		0.235457	0.248422	0.0148126	-0.0766511
		0.234337	0.244946	0.0145903	-0.077032
		0.234321	0.241731	0.0142458	-0.0772298
		0.234045	0.240955	0.0140289	-0.0774626
		0.233382	0.240365	0.0139813	-0.0776983
		0.233297	0.240328	0.0139267	-0.077729
		0.2332	0.238372	0.0139198	-0.0781333
		0.232498	0.237093	0.0138021	-0.0784165
		0.232451	0.235591	0.0137392	-0.0788804
		0.232447	0.234865	0.0134383	-0.0789254
		0.232194	0.234704	0.0132127	-0.0792602
		0.230598	0.233546	0.0131953	-0.0798219
		0.229975	0.231689	0.0127727	-0.0804422
		0.22854	0.230344	0.0123269	-0.0805126
		0.228512	0.229847	0.0119361	-0.0809733
		0.228491	0.229809	0.0118964	-0.0813247
		0.228136	0.228708	0.0118741	-0.0816441
		0.227915	0.228483	0.0117478	-0.0818039
		0.226937	0.226883	0.0113465	-0.081974
		0.226397	0.220187	0.0113349	-0.0819808
		0.225793	0.21765	0.0111702	-0.0821877
		0.22552	0.214066	0.0111654	-0.0821991
		0.224376	0.212976	0.0111398	-0.0826337
		0.223326	0.212888	0.0104706	-0.0829201
		0.223132	0.212194	0.0103945	-0.0831228
		0.222868	0.211613	0.0099666	-0.0835353
		0.222623	0.210505	0.00996618	-0.0835512
		0.221528	0.210044	0.00991376	-0.0842744
		0.220948	0.209409	0.0098071	-0.0844622
		0.220825	0.209175	0.00970716	-0.0846685
		0.220448	0.209071	0.00921578	-0.084676
		0.220335	0.206953	0.00909271	-0.0854929
		0.220181	0.204976	0.00907312	-0.0863274
		0.219949	0.204201	0.00900507	-0.0872468
		0.219444	0.203795	0.00894985	-0.0873298
		0.218945	0.202856	0.00860732	-0.0878098
		0.21729	0.202744	0.00860171	-0.0879785
		0.217191	0.20174	0.00857688	-0.0880684
		0.217077	0.200988	0.00847978	-0.0885658
		0.215984	0.200257	0.00825632	-0.0887956
		0.215003	0.19895	0.00824661	-0.0890604
		0.213847	0.198785	0.00824028	-0.0891763
		0.213653	0.197779	0.00814464	-0.0892113
		0.212504	0.197341	0.00799518	-0.0892161
		0.211831	0.195999	0.00790012	-0.0895046
		0.211732	0.195426	0.00764611	-0.0895503
		0.210965	0.195331	0.00748257	-0.0904392
		0.210317	0.195211	0.00723587	-0.0905039
		0.210288	0.194304	0.00710555	-0.0905199
		0.210197	0.192036	0.00684946	-0.0907327
		0.208052	0.190664	0.00677362	-0.0913065
		0.207683	0.188751	0.00671715	-0.0914056
		0.207269	0.187605	0.00646846	-0.0916903
		0.206476	0.187367	0.00618755	-0.0918269
		0.205888	0.187295	0.00614133	-0.0919657
		0.204906	0.186459	0.00611638	-0.0921863
		0.204705	0.185459	0.00610387	-0.0922236
		0.204528	0.185237	0.00598797	-0.0927898
		0.204438	0.182551	0.00586198	-0.0929889
		0.204396	0.180205	0.00572194	-0.093044
		0.204242	0.178509	0.0056997	-0.0931448
		0.204204	0.176799	0.00563532	-0.093384
		0.204111	0.17654	0.00546264	-0.0936515
		0.204098	0.17452	0.00544399	-0.0946975
		0.203626	0.174078	0.00529398	-0.0948433
		0.203355	0.173292	0.00523202	-0.0950669
		0.20318	0.171068	0.00472885	-0.0954931
		0.202207	0.170928	0.00469996	-0.0956265
		0.202005	0.16748	0.00450754	-0.0956904
		0.201879	0.165215	0.00434232	-0.0957424
		0.201216	0.165215	0.00414967	-0.0957538
		0.20111	0.161873	0.00403277	-0.0957995
		0.20092	0.161539	0.00394773	-0.0959013
		0.199805	0.161389	0.00383348	-0.0960559
		0.199348	0.160689	0.00369158	-0.0962937
		0.198776	0.159692	0.00364957	-0.0963602
		0.198729	0.159227	0.0035336	-0.0964011
		0.198702	0.158659	0.00352849	-0.0966559
		0.198312	0.158434	0.00325922	-0.0966755
		0.198131	0.158085	0.00294474	-0.0969512
		0.198056	0.157289	0.00274856	-0.0972687
		0.197777	0.155952	0.0027351	-0.0972696
		0.197014	0.155578	0.00268909	-0.0981583
		0.196246	0.155006	0.00255182	-0.0986881
		0.195538	0.155001	0.00254315	-0.0992655
		0.195466	0.153981	0.00233117	-0.0993868
		0.19487	0.152717	0.00225527	-0.0996304
		0.194257	0.151825	0.00225421	-0.0996799
		0.194205	0.151343	0.00212818	-0.100003
		0.193523	0.151335	0.00195811	-0.100083
		0.193274	0.150984	0.00178715	-0.100093
		0.192598	0.150843	0.00172995	-0.100274
		0.192572	0.150262	0.00143399	-0.10038
		0.192272	0.149129	0.00118467	-0.100554
		0.191703	0.148845	0.000765471	-0.10058
		0.191151	0.148268	0.000694877	-0.100647
		0.190883	0.147726	0.00064524	-0.100672
		0.190829	0.147068	0.000586168	-0.100727
		0.190458	0.146467	0.00057232	-0.100784
		0.190037	0.144711	0.000448654	-0.10119
		0.189677	0.144423	0.000355972	-0.101197
		0.189437	0.144388	0.000209803	-0.101648
		0.189154	0.143837	0.000171992	-0.101847
		0.18908	0.143813	7.02e-06	-0.1019
		0.187971	0.143159	-0.000228092	-0.101941
		0.187794	0.142849	-0.000377271	-0.102049
		0.187171	0.142434	-0.000553797	-0.102281
		0.186807	0.142224	-0.000799667	-0.102306
		0.185421	0.140582	-0.000938154	-0.102463
		0.185297	0.140206	-0.00108339	-0.102487
		0.184036	0.138134	-0.00139822	-0.102672
		0.183927	0.135305	-0.00142162	-0.102829
		0.183146	0.135297	-0.00153576	-0.103408
		0.181974	0.134822	-0.00164153	-0.103548
		0.180902	0.13429	-0.00183111	-0.103858
		0.180773	0.133608	-0.00199305	-0.104157
		0.180151	0.133595	-0.00206863	-0.104391
		0.18015	0.133255	-0.00208692	-0.104403
		0.179934	0.131155	-0.00211065	-0.104585
		0.179468	0.130316	-0.00226552	-0.105268
		0.179459	0.130079	-0.0024138	-0.105668
		0.179091	0.129784	-0.00244886	-0.105763
		0.17844	0.128335	-0.00250346	-0.105821
		0.178397	0.126644	-0.00328029	-0.106182
		0.177887	0.125708	-0.0036939	-0.10622
		0.177703	0.123101	-0.00374226	-0.106271
		0.177574	0.121146	-0.00385845	-0.106278
		0.177509	0.12023	-0.00397283	-0.106441
		0.176954	0.119811	-0.00399727	-0.106576
		0.176953	0.118131	-0.00424266	-0.10667
		0.175876	0.117751	-0.00426929	-0.106904
		0.175765	0.117289	-0.0045877	-0.106969
		0.175026	0.117174	-0.00468865	-0.107115
		0.174812	0.116821	-0.00470981	-0.107191
		0.174268	0.116783	-0.00554312	-0.108576
		0.17323	0.115865	-0.00559838	-0.108668
		0.173022	0.115633	-0.00563517	-0.10901
		0.172875	0.115266	-0.00573888	-0.109241
		0.172398	0.115097	-0.00580421	-0.109322
		0.171896	0.115044	-0.00619886	-0.109489
		0.17145	0.113392	-0.00622028	-0.110209
		0.171363	0.113151	-0.00625426	-0.110242
		0.171256	0.112938	-0.00636209	-0.110724
		0.170337	0.112535	-0.00639404	-0.110905
		0.169179	0.112352	-0.00662728	-0.111322
		0.168431	0.111284	-0.00685485	-0.111929
		0.167668	0.110749	-0.00687568	-0.112162
		0.167667	0.110709	-0.00708221	-0.112244
		0.167171	0.110643	-0.00731523	-0.11229
		0.166982	0.110117	-0.00751143	-0.112336
		0.165956	0.109191	-0.00760529	-0.113321
		0.165944	0.109014	-0.00762269	-0.113467
		0.165915	0.10875	-0.00769704	-0.113472
		0.16571	0.108451	-0.00779059	-0.113489
		0.165481	0.107939	-0.00785201	-0.113817
		0.165027	0.107926	-0.00785592	-0.113866
		0.164931	0.106604	-0.00798989	-0.113977
		0.164901	0.106519	-0.00799286	-0.114348
		0.164733	0.104457	-0.00829303	-0.114349
		0.164179	0.10342	-0.00833234	-0.114948
		0.163506	0.102469	-0.00856326	-0.115354
		0.163457	0.10238	-0.00878275	-0.115721
		0.163438	0.102215	-0.0090018	-0.115759
		0.163	0.102043	-0.00908617	-0.1159
		0.162049	0.101715	-0.00934596	-0.115935
		0.161056	0.0989452	-0.00939067	-0.116113
		0.160815	0.0976035	-0.00945889	-0.11632
		0.160575	0.0973586	-0.00946407	-0.116358
		0.160566	0.0972771	-0.00946838	-0.116564
		0.160293	0.0969621	-0.00949981	-0.116584
		0.159878	0.0965499	-0.00957146	-0.116703
		0.159488	0.0956859	-0.00959701	-0.116926
		0.158173	0.093806	-0.00963609	-0.117133
		0.15766	0.0922873	-0.00970214	-0.117141
		0.157517	0.0919029	-0.010097	-0.117582
		0.157269	0.0913651	-0.010329	-0.117789
		0.156949	0.0909161	-0.0103474	-0.117921
		0.156803	0.0887311	-0.0103662	-0.118057
		0.156601	0.0875	-0.01049	-0.118234
		0.156201	0.0874655	-0.0106598	-0.118372
		0.156072	0.0874059	-0.0107315	-0.118526
		0.155378	0.086928	-0.0107746	-0.118529
		0.154882	0.086597	-0.010825	-0.118619
		0.154462	0.0861803	-0.0109399	-0.119555
		0.154075	0.0857627	-0.0111331	-0.119567
		0.153924	0.0856581	-0.011698	-0.119663
		0.153883	0.0855051	-0.0118626	-0.119669
		0.153831	0.0852133	-0.0119149	-0.119874
		0.153617	0.085014	-0.0119271	-0.120246
		0.15193	0.0847065	-0.0120556	-0.120369
		0.151726	0.084632	-0.0120623	-0.120661
		0.1514	0.084175	-0.0122856	-0.120663
		0.151345	0.0832307	-0.0124575	-0.120994
		0.15089	0.0826125	-0.0125853	-0.121041
		0.150752	0.08219	-0.0128474	-0.12206
		0.149239	0.081887	-0.0130176	-0.122145
		0.149054	0.0816615	-0.0130763	-0.122582
		0.148732	0.081555	-0.0131102	-0.122995
		0.148697	0.0815446	-0.0132572	-0.12354
		0.148194	0.0812718	-0.0132641	-0.123697
		0.148161	0.0790919	-0.0133454	-0.123728
		0.148053	0.078365	-0.013587	-0.1239
		0.146972	0.0779032	-0.0135956	-0.124071
		0.146969	0.0776776	-0.0139145	-0.124187
		0.146902	0.0772135	-0.0139988	-0.124711
		0.146834	0.0766053	-0.0141602	-0.124844
		0.146449	0.075972	-0.0141675	-0.124859
		0.145703	0.0757525	-0.0142753	-0.12495
		0.145657	0.0755957	-0.0143201	-0.125001
		0.145619	0.0755816	-0.0148318	-0.125691
		0.145297	0.0754748	-0.0151825	-0.125757
		0.145074	0.0749092	-0.0152816	-0.126159
		0.144524	0.0745919	-0.0156712	-0.126243
		0.144258	0.0744895	-0.0157283	-0.126369
		0.143547	0.0742946	-0.0159296	-0.126572
		0.142475	0.0734622	-0.0161092	-0.126867
		0.141836	0.073322	-0.0162012	-0.127289
		0.141303	0.0732265	-0.0162869	-0.127551
		0.141184	0.0709634	-0.0164748	-0.127683
		0.141048	0.0706688	-0.0167209	-0.127789
		0.140876	0.0704349	-0.0169441	-0.127824
		0.140559	0.0699309	-0.0171695	-0.127962
		0.139899	0.0697454	-0.0173843	-0.127999
		0.139759	0.0694851	-0.0175211	-0.128381
		0.139629	0.0687445	-0.017531	-0.128902
		0.13957	0.0683215	-0.0175865	-0.128964
		0.139246	0.0681113	-0.0176059	-0.129241
		0.139082	0.067253	-0.0177935	-0.130206
		0.13826	0.0657903	-0.0178627	-0.130271
		0.138244	0.0655574	-0.0181452	-0.130327
		0.1377	0.0654299	-0.0182357	-0.130349
		0.137358	0.0643963	-0.0182771	-0.130463
		0.137197	0.0640246	-0.0182851	-0.130676
		0.13674	0.0634626	-0.0183602	-0.130805
		0.13627	0.0626976	-0.0183842	-0.131082
		0.136126	0.0626599	-0.0185214	-0.131082
		0.135998	0.0626553	-0.0187558	-0.131209
		0.135614	0.0624677	-0.0190034	-0.131636
		0.135521	0.062393	-0.019074	-0.132029
		0.135509	0.0623721	-0.0193354	-0.132036
		0.134879	0.0615547	-0.0196699	-0.132098
		0.133765	0.0615279	-0.0199361	-0.132146
		0.133568	0.060617	-0.0200319	-0.132166
		0.133273	0.0603801	-0.0201811	-0.132699
		0.132783	0.0599275	-0.0202623	-0.132807
		0.13276	0.0597443	-0.0204004	-0.132835
		0.132697	0.0592071	-0.0204818	-0.132901
		0.131821	0.0591098	-0.0206044	-0.13294
		0.131655	0.0586566	-0.0206161	-0.133091
		0.131602	0.0586378	-0.0207201	-0.133529
		0.131561	0.058315	-0.0207237	-0.134033
		0.131306	0.0581436	-0.0207453	-0.134187
		0.131111	0.0576863	-0.0208238	-0.134369
		0.130949	0.0575592	-0.0209954	-0.134418
		0.130826	0.0571489	-0.0210229	-0.134421
		0.130767	0.057143	-0.0211625	-0.134563
		0.130505	0.0568792	-0.0213315	-0.134765
		0.130163	0.0564482	-0.0216923	-0.134776
		0.129924	0.0564474	-0.0217451	-0.135025
		0.129585	0.0555164	-0.0217542	-0.135189
		0.128667	0.0553335	-0.0217737	-0.135379
		0.128195	0.0550309	-0.0219	-0.135624
		0.128089	0.0537558	-0.0225605	-0.135648
		0.127968	0.0536874	-0.0225861	-0.135692
		0.127698	0.0530118	-0.022759	-0.135893
		0.127145	0.0530022	-0.0228962	-0.135967
		0.127062	0.0529469	-0.02334	-0.136535
		0.126905	0.0529412	-0.0233459	-0.136751
		0.126903	0.0526312	-0.0234055	-0.13716
		0.126608	0.0522701	-0.0235353	-0.137487
		0.12629	0.0518435	-0.0235461	-0.137745
		0.126279	0.0517894	-0.0238831	-0.137869
		0.125969	0.0515153	-0.0238876	-0.138008
		0.125708	0.0513055	-0.0240071	-0.138031
		0.125396	0.0511365	-0.0243209	-0.138047
		0.12516	0.051106	-0.0243846	-0.138076
		0.124996	0.0510596	-0.0245543	-0.138658
		0.124855	0.0509663	-0.0247097	-0.138746
		0.124519	0.0507694	-0.0247983	-0.138909
		0.124286	0.0500934	-0.0249929	-0.13907
		0.124089	0.0498959	-0.0252207	-0.13914
		0.123707	0.0494755	-0.0253488	-0.139165
		0.123591	0.0486524	-0.0255645	-0.139231
		0.123473	0.0484558	-0.0256571	-0.139282
		0.123357	0.0483802	-0.0257321	-0.13937
		0.123351	0.0479095	-0.0257427	-0.13941
		0.1232	0.0477545	-0.0259007	-0.139514
		0.123128	0.0477301	-0.0259797	-0.139947
		0.123026	0.0476642	-0.0260037	-0.140508
		0.122573	0.0476576	-0.0261659	-0.140571
		0.122373	0.0475949	-0.0261921	-0.140678
		0.122283	0.0473668	-0.0262583	-0.140781
		0.122065	0.0465702	-0.0263456	-0.140892
		0.121545	0.0462309	-0.0267575	-0.140941
		0.12134	0.0462097	-0.0268097	-0.14112
		0.120012	0.0461434	-0.0268755	-0.141249
		0.119992	0.045816	-0.0269631	-0.141251
		0.119774	0.0457753	-0.0271345	-0.141293
		0.119192	0.0457519	-0.0274856	-0.141618
		0.118811	0.0456207	-0.027672	-0.141791
		0.118188	0.045334	-0.0278088	-0.141959
		0.117874	0.0453189	-0.0278604	-0.142042
		0.117644	0.0450224	-0.0280191	-0.142297
		0.117482	0.0448332	-0.0281932	-0.142471
		0.117265	0.0445775	-0.0283582	-0.142723
		0.116245	0.04408	-0.0284058	-0.143127
		0.115967	0.0439245	-0.0284293	-0.143516
		0.1156	0.043252	-0.0284514	-0.143586
		0.115539	0.0431404	-0.0286365	-0.143628
		0.115489	0.0427242	-0.0288176	-0.143727
		0.115238	0.0427236	-0.0289374	-0.14375
		0.114857	0.0426973	-0.0289459	-0.144258
		0.114804	0.0426631	-0.0291183	-0.144426
		0.114788	0.0422319	-0.029164	-0.144438
		0.114722	0.0421446	-0.029243	-0.144473
		0.11459	0.0421413	-0.0293527	-0.144707
		0.114444	0.0417659	-0.0294442	-0.144919
		0.114171	0.0417162	-0.0295307	-0.144931
		0.113585	0.041625	-0.029734	-0.144987
		0.113526	0.040862	-0.0297674	-0.144994
		0.113493	0.04077	-0.0298466	-0.14502
		0.11344	0.0407417	-0.0299011	-0.14504
		0.11338	0.0405925	-0.0299154	-0.145139
		0.113292	0.0404123	-0.0299483	-0.145214
		0.113187	0.0401458	-0.0300141	-0.145417
		0.112933	0.0400952	-0.0300952	-0.145459
		0.112925	0.0398149	-0.0301531	-0.145658
		0.112794	0.0395581	-0.0302654	-0.145703
		0.112307	0.0393732	-0.0304977	-0.14575
		0.111976	0.0392329	-0.0305215	-0.146173
		0.111251	0.0390545	-0.0305256	-0.146201
		0.111062	0.038943	-0.0306132	-0.146409
		0.110995	0.0388582	-0.0306985	-0.146535
		0.110265	0.0386035	-0.0307106	-0.146563
		0.10997	0.0384834	-0.0307917	-0.146749
		0.109824	0.038391	-0.0309841	-0.14682
		0.10962	0.0383218	-0.031462	-0.146967
		0.10926	0.037671	-0.0316008	-0.147082
		0.109225	0.0375216	-0.0317908	-0.147142
		0.108815	0.0370268	-0.031814	-0.147881
		0.108721	0.036981	-0.0319031	-0.147933
		0.107893	0.0369652	-0.0320737	-0.148168
		0.107675	0.036905	-0.0323199	-0.14818
		0.107648	0.0366872	-0.0323754	-0.148199
		0.106855	0.0366872	-0.0324218	-0.148204
		0.106718	0.0366684	-0.0325686	-0.148403
		0.106392	0.0365255	-0.0329351	-0.148818
		0.106334	0.0363719	-0.0329369	-0.148853
		0.105955	0.0357247	-0.0331547	-0.149195
		0.105927	0.0354109	-0.0331694	-0.149377
		0.105809	0.0353256	-0.0333024	-0.149385
		0.105709	0.0349985	-0.0337043	-0.150246
		0.105692	0.0344396	-0.033724	-0.150532
		0.105527	0.0337926	-0.033909	-0.150617
		0.105382	0.0336813	-0.0340712	-0.150863
		0.105121	0.0333977	-0.0345068	-0.151362
		0.104932	0.0333609	-0.0345972	-0.151622
		0.104624	0.0329839	-0.0348862	-0.151742
		0.104055	0.0328548	-0.0349476	-0.151865
		0.103733	0.0327313	-0.0349901	-0.151964
		0.103625	0.032385	-0.035048	-0.152106
		0.10361	0.0322582	-0.03508	-0.15211
		0.102794	0.0321711	-0.0352525	-0.152304
		0.10275	0.0319229	-0.0352848	-0.152567
		0.102371	0.0313884	-0.0353632	-0.152637
		0.101556	0.0309014	-0.0354321	-0.15296
		0.101441	0.0297473	-0.0354474	-0.153153
		0.10132	0.0294755	-0.0354848	-0.153252
		0.101229	0.0293502	-0.0355289	-0.153286
		0.100647	0.0290296	-0.0355733	-0.15337
		0.100322	0.0289982	-0.0355938	-0.153536
		0.100143	0.0287192	-0.0356537	-0.15375
		0.0991541	0.0286462	-0.0361637	-0.153874
		0.0988962	0.0285975	-0.0362889	-0.154036
		0.0988645	0.0283344	-0.0362923	-0.15459
		0.0986874	0.0277531	-0.0362926	-0.154697
		0.0985533	0.027744	-0.0365547	-0.154801
		0.0985227	0.0274675	-0.0369369	-0.155422
		0.0985121	0.0273425	-0.0370825	-0.15543
		0.098062	0.0272072	-0.0373636	-0.155468
		0.0978276	0.0268291	-0.0375853	-0.155576
		0.097142	0.0261944	-0.0382103	-0.155768
		0.0965176	0.0261853	-0.0384494	-0.155773
		0.0960705	0.0256687	-0.0384774	-0.15617
		0.0958078	0.0254322	-0.0387519	-0.156178
		0.0955317	0.0247979	-0.0387907	-0.156935
		0.0954365	0.0244308	-0.0388532	-0.157831
		0.095422	0.0243807	-0.0389131	-0.15791
		0.0951151	0.024361	-0.0390518	-0.158053
		0.0951028	0.024321	-0.0393744	-0.158427
		0.0948368	0.0243194	-0.0393908	-0.158516
		0.0940837	0.0238822	-0.0395934	-0.158599
		0.0935136	0.0236236	-0.0396748	-0.158889
		0.0930593	0.0235923	-0.0397097	-0.159196
		0.0925549	0.0235625	-0.0398083	-0.159415
		0.0916518	0.0235167	-0.0398149	-0.159501
		0.091356	0.0233177	-0.0399932	-0.159682
		0.0909628	0.0229602	-0.0400012	-0.160017
		0.0904731	0.0224709	-0.040452	-0.160203
		0.0903206	0.0224169	-0.0404643	-0.160264
		0.0902801	0.0223478	-0.0405869	-0.160445
		0.0902408	0.0220365	-0.0407365	-0.160562
		0.090225	0.0215986	-0.0408056	-0.161553
		0.0899928	0.0215369	-0.0410518	-0.161962
		0.0898095	0.0212417	-0.0414148	-0.162079
		0.0897751	0.0210143	-0.0415002	-0.162177
		0.0896954	0.0210004	-0.0416235	-0.163112
		0.0894691	0.0203677	-0.0417426	-0.163559
		0.0881022	0.0201048	-0.0418422	-0.163754
		0.0880142	0.0196491	-0.0421127	-0.164391
		0.0877587	0.019536	-0.042152	-0.164403
		0.0875891	0.019349	-0.0424752	-0.164403
		0.087372	0.0193108	-0.0425042	-0.164561
		0.0872301	0.0191232	-0.0426177	-0.164623
		0.0870327	0.019026	-0.0427819	-0.164874
		0.0869023	0.0189488	-0.0429363	-0.165055
		0.086766	0.0188828	-0.0430866	-0.165078
		0.0866966	0.0186935	-0.0431259	-0.165459
		0.0865162	0.0180773	-0.043373	-0.165931
		0.0861829	0.0176183	-0.0437607	-0.166127
		0.0859951	0.0173037	-0.0440214	-0.166144
		0.0851919	0.0172849	-0.0440559	-0.166693
		0.0849294	0.0165447	-0.0440771	-0.166827
		0.0840193	0.016285	-0.0441805	-0.166964
		0.0839734	0.0161975	-0.0442045	-0.167207
		0.0839387	0.0160555	-0.0442252	-0.167635
		0.0837752	0.0158567	-0.0442747	-0.167665
		0.0836164	0.0157861	-0.0447414	-0.167763
		0.0835701	0.0156368	-0.0448158	-0.167896
		0.0832963	0.0155579	-0.0449914	-0.168152
		0.0832661	0.0155404	-0.0450302	-0.168273
		0.0832177	0.0151992	-0.0451111	-0.168492
		0.0830104	0.0151752	-0.0452795	-0.168543
		0.0828976	0.0147994	-0.0455043	-0.168618
		0.0826589	0.0147001	-0.0456371	-0.168739
		0.0826162	0.0145781	-0.0456653	-0.16882
		0.0825355	0.0139586	-0.0456663	-0.168832
		0.0825355	0.0137403	-0.0456759	-0.169619
		0.0817536	0.013443	-0.045989	-0.169728
		0.0817318	0.0133664	-0.0466137	-0.169837
		0.0814592	0.0131843	-0.0467083	-0.169973
		0.0814534	0.0130361	-0.0467514	-0.170336
		0.0814206	0.0129216	-0.0472378	-0.170454
		0.0810482	0.0127581	-0.047382	-0.17075
		0.0803542	0.0127007	-0.0475044	-0.170771
		0.0801711	0.0123991	-0.0476471	-0.170902
		0.079554	0.0123423	-0.0476662	-0.17153
		0.0794106	0.0122706	-0.0481407	-0.171846
		0.0793965	0.0121485	-0.0482488	-0.171937
		0.0792742	0.0112497	-0.048539	-0.172302
		0.0792291	0.0110956	-0.0485817	-0.172367
		0.0789047	0.0108432	-0.0488081	-0.172467
		0.078667	0.0107973	-0.0488731	-0.17254
		0.0785769	0.0104909	-0.0491532	-0.172902
		0.0784874	0.0103171	-0.0491664	-0.172921
		0.0784686	0.0101436	-0.049214	-0.173349
		0.0780938	0.00984573	-0.0492417	-0.173362
		0.0780514	0.00982944	-0.0492858	-0.173576
		0.0779864	0.00971978	-0.0494561	-0.173693
		0.0775774	0.00964683	-0.0496177	-0.173745
		0.0770743	0.00943708	-0.0500058	-0.173779
		0.0769492	0.00917271	-0.050461	-0.173931
		0.0765908	0.00793144	-0.0505566	-0.174042
		0.0765493	0.00781137	-0.0505919	-0.17405
		0.0762102	0.00774144	-0.0507338	-0.174189
		0.0760812	0.00758688	-0.0508391	-0.174213
		0.0759416	0.00707089	-0.0508571	-0.174307
		0.0758566	0.00641797	-0.0510926	-0.174427
		0.0757914	0.00620292	-0.0512277	-0.174465
		0.0753702	0.00617347	-0.0512972	-0.174608
		0.0753514	0.00615412	-0.0513754	-0.174954
		0.0752218	0.00589857	-0.0514607	-0.175035
		0.0751291	0.00546674	-0.0517206	-0.175126
		0.0747415	0.00532645	-0.0517386	-0.175172
		0.0746144	0.00518205	-0.0519634	-0.17525
		0.0745783	0.00500013	-0.0520558	-0.175267
		0.0743494	0.00495373	-0.0520849	-0.175331
		0.0738639	0.00481864	-0.0522784	-0.175854
		0.0737431	0.00472543	-0.0523186	-0.176206
		0.073589	0.00450499	-0.052485	-0.176372
		0.0734621	0.00447339	-0.0525097	-0.176804
		0.0733848	0.00432057	-0.0526023	-0.176926
		0.0730184	0.00421053	-0.0526881	-0.177041
		0.0730074	0.00378344	-0.0527249	-0.177053
		0.0729413	0.00370538	-0.0527337	-0.177237
		0.0725904	0.00370414	-0.0530887	-0.177856
		0.0724178	0.00343601	-0.0534703	-0.178189
		0.0717165	0.00342767	-0.0538067	-0.178221
		0.0713213	0.00339398	-0.0539238	-0.178257
		0.0703905	0.00330324	-0.0539995	-0.178297
		0.070204	0.00287016	-0.0540192	-0.178339
		0.069972	0.00280115	-0.0540577	-0.178357
		0.0695263	0.00279425	-0.0540923	-0.178988
		0.0693252	0.00256791	-0.0541014	-0.179055
		0.0690447	0.00223844	-0.0541832	-0.179057
		0.069035	0.00212263	-0.0543701	-0.179078
		0.0689835	0.00208748	-0.0547762	-0.179288
		0.0687367	0.0019167	-0.0548399	-0.179963
		0.068707	0.00144214	-0.0548458	-0.180469
		0.0686313	0.00143876	-0.0551969	-0.180793
		0.0675342	0.00141519	-0.0552883	-0.181124
		0.0670952	0.00114628	-0.0553132	-0.181317
		0.0668578	0.00106546	-0.0554978	-0.181343
		0.0668529	0.00103482	-0.0556641	-0.181512
		0.0668352	0.000797205	-0.0557223	-0.181695
		0.0664681	0.00076693	-0.0558529	-0.182135
		0.0662524	0.000473186	-0.0559273	-0.182365
		0.0659557	0.000110129	-0.0559387	-0.183144
		0.0654785	0.000107497	-0.0560691	-0.183289
		0.0651463	-7.46e-05	-0.0563584	-0.18347
		0.0647764	-8.81e-05	-0.0565112	-0.183667
		0.0644072	-0.00029348	-0.0566609	-0.183712
		0.0644063	-0.00055735	-0.0569522	-0.183939
		0.0641164	-0.000602468	-0.0572036	-0.184042
		0.0639469	-0.000741979	-0.0572404	-0.184284
		0.0638087	-0.000915725	-0.0573498	-0.184456
		0.0633526	-0.00103624	-0.0578874	-0.184925
		0.0632249	-0.00106908	-0.0582087	-0.185392
		0.0629121	-0.00110606	-0.0585712	-0.185867
		0.0625187	-0.00134821	-0.0587107	-0.186121
		0.0623785	-0.00139191	-0.0587292	-0.186209
		0.06236	-0.00198653	-0.058768	-0.186471
		0.062207	-0.00239579	-0.0587683	-0.186641
		0.0617745	-0.00262594	-0.0589342	-0.186952
		0.0616618	-0.00267826	-0.0589442	-0.18709
		0.0615412	-0.00272281	-0.0592442	-0.187101
		0.0613764	-0.00325854	-0.0595326	-0.187246
		0.0609775	-0.00341311	-0.0599266	-0.187391
		0.0601776	-0.00406007	-0.0600701	-0.187479
		0.0601699	-0.00449748	-0.0601334	-0.187548
		0.0599976	-0.00453111	-0.0607919	-0.187552
		0.0593734	-0.00515145	-0.0608406	-0.187556
		0.0592901	-0.00518243	-0.0610591	-0.188366
		0.0591147	-0.00519275	-0.0611492	-0.18858
		0.0590211	-0.00529472	-0.0613478	-0.188905
		0.0589001	-0.0054991	-0.0614645	-0.188937
		0.0585476	-0.00566788	-0.0614958	-0.188999
		0.0584108	-0.00595567	-0.0619802	-0.189057
		0.0583426	-0.00611333	-0.0620526	-0.18906
		0.0582035	-0.0061758	-0.0620943	-0.189108
		0.0575972	-0.00635071	-0.062191	-0.18925
		0.0574746	-0.00654845	-0.0624876	-0.189326
		0.0574319	-0.00654917	-0.0625014	-0.189391
		0.056617	-0.00675981	-0.0626288	-0.189495
		0.0561967	-0.00686832	-0.0628116	-0.189641
		0.0560619	-0.00695009	-0.0628666	-0.189766
		0.0560403	-0.00703671	-0.0630255	-0.189842
		0.056004	-0.00716194	-0.0630884	-0.189867
		0.0559649	-0.00756274	-0.0631124	-0.189913
		0.0558914	-0.00768728	-0.0631686	-0.189951
		0.0558877	-0.00773398	-0.0632063	-0.189962
		0.0558405	-0.00798063	-0.0633145	-0.190487
		0.0552999	-0.00835677	-0.0633374	-0.190746
		0.0551621	-0.00850785	-0.0633468	-0.19104
		0.0551575	-0.0088505	-0.0634059	-0.191171
		0.0547959	-0.00886548	-0.0634715	-0.191365
		0.0542268	-0.00893018	-0.0635896	-0.191399
		0.0541128	-0.00925741	-0.0639984	-0.191531
		0.0539578	-0.009324	-0.0641229	-0.191671
		0.053414	-0.00947944	-0.0646305	-0.191928
		0.0528797	-0.00953978	-0.0647511	-0.191995
		0.0526389	-0.0105381	-0.064809	-0.192443
		0.0526075	-0.0105933	-0.0648527	-0.192528
		0.0523034	-0.0106719	-0.0648628	-0.192545
		0.052242	-0.0106921	-0.0649208	-0.192902
		0.0518724	-0.0108063	-0.064968	-0.193233
		0.0517854	-0.0110749	-0.0652481	-0.19349
		0.051388	-0.0114233	-0.0653446	-0.193532
		0.051275	-0.0114997	-0.0656786	-0.193991
		0.0509557	-0.0116062	-0.0656869	-0.194227
		0.0506521	-0.0116907	-0.0658494	-0.194288
		0.0495389	-0.0118923	-0.0662357	-0.194904
		0.0494914	-0.0121909	-0.0662461	-0.195819
		0.049476	-0.0128629	-0.0665905	-0.195837
		0.0493134	-0.0129467	-0.0665936	-0.195911
		0.0492657	-0.013794	-0.0669255	-0.196045
		0.049042	-0.0141722	-0.0669821	-0.196386
		0.0487055	-0.0141771	-0.0671318	-0.196444
		0.0484648	-0.0142152	-0.0671404	-0.196523
		0.048245	-0.0142786	-0.0672055	-0.196584
		0.0478258	-0.0142961	-0.0674901	-0.196646
		0.0473842	-0.0145725	-0.0676092	-0.196739
		0.0473708	-0.0147532	-0.0676478	-0.197304
		0.0470193	-0.0148601	-0.0677001	-0.197413
		0.046852	-0.0152963	-0.0678405	-0.19796
		0.0464107	-0.0154344	-0.0678423	-0.198072
		0.046354	-0.0158563	-0.0678971	-0.198084
		0.0460027	-0.0159725	-0.0681444	-0.19829
		0.0459716	-0.0161133	-0.0681666	-0.198298
		0.0459019	-0.0161588	-0.0681785	-0.198993
		0.0459013	-0.0162585	-0.0685608	-0.19998
		0.0455239	-0.0163242	-0.0685668	-0.199982
		0.045491	-0.0163353	-0.0690961	-0.200045
		0.0454812	-0.016395	-0.0691517	-0.20007
		0.0451956	-0.0167481	-0.0693748	-0.200136
		0.0450605	-0.0167732	-0.0695889	-0.200148
		0.0450096	-0.0168044	-0.0697061	-0.200271
		0.0442803	-0.016829	-0.0698896	-0.20031
		0.04409	-0.0172709	-0.0699112	-0.200498
		0.0437037	-0.0173353	-0.0699539	-0.200871
		0.0434001	-0.017576	-0.07015	-0.200877
		0.0433893	-0.0180574	-0.0709431	-0.201396
		0.0432292	-0.0182195	-0.070959	-0.201441
		0.0431439	-0.0184447	-0.0710373	-0.201761
		0.0431137	-0.0185576	-0.0711154	-0.201901
		0.0430813	-0.0185616	-0.0711608	-0.202144
		0.04306	-0.0189793	-0.0713733	-0.202383
		0.0427436	-0.019326	-0.0714452	-0.202796
		0.0426615	-0.0198311	-0.0715807	-0.2029
		0.0424947	-0.0198979	-0.0717736	-0.203165
		0.0421635	-0.0199103	-0.0720891	-0.203429
		0.0419876	-0.0202317	-0.0722805	-0.20358
		0.0410798	-0.020342	-0.0723613	-0.204858
		0.0405943	-0.0204845	-0.0724585	-0.205279
		0.0405526	-0.0206115	-0.0727315	-0.20612
		0.0403349	-0.0207855	-0.072896	-0.20616
		0.0399457	-0.0208683	-0.0731816	-0.206558
		0.0398852	-0.0208876	-0.0733129	-0.206843
		0.0398781	-0.0210724	-0.0736591	-0.206858
		0.0392403	-0.0210774	-0.0738338	-0.206957
		0.0389638	-0.0212209	-0.0739433	-0.207696
		0.0385297	-0.0213003	-0.0742626	-0.20795
		0.038424	-0.0213838	-0.0743562	-0.208469
		0.0383085	-0.0214789	-0.0743775	-0.208696
		0.0376986	-0.0218978	-0.0745179	-0.208773
		0.0370697	-0.0219279	-0.0745366	-0.209278
		0.0370352	-0.0219884	-0.0745464	-0.209852
		0.036919	-0.0221069	-0.0745981	-0.210118
		0.0363221	-0.0222539	-0.0752703	-0.210436
		0.0359199	-0.0223057	-0.0753955	-0.210852
		0.0359072	-0.0228737	-0.0755994	-0.211104
		0.0355313	-0.0228867	-0.0757288	-0.21137
		0.03547	-0.0229008	-0.075771	-0.211466
		0.0354139	-0.0232507	-0.0758121	-0.211472
		0.0352557	-0.0234309	-0.0759364	-0.211613
		0.035018	-0.0240785	-0.0761976	-0.211803
		0.0349612	-0.0241689	-0.0762552	-0.212399
		0.0346906	-0.0243026	-0.0762708	-0.212542
		0.0346262	-0.0245113	-0.076302	-0.212741
		0.0341777	-0.0246494	-0.0763338	-0.21275
		0.0336466	-0.025198	-0.0764314	-0.212921
		0.0332751	-0.0253625	-0.0764785	-0.213026
		0.0329103	-0.0253788	-0.0766057	-0.213343
		0.0324541	-0.0257382	-0.0772905	-0.21346
		0.0322898	-0.0257894	-0.0775257	-0.213938
		0.0322423	-0.0259754	-0.0775307	-0.21476
		0.0321959	-0.0263916	-0.0777181	-0.214798
		0.0317673	-0.0265309	-0.0778948	-0.214868
		0.0310339	-0.0265655	-0.0781115	-0.214967
		0.0305876	-0.0265703	-0.0781924	-0.21588
		0.0304964	-0.0271049	-0.078204	-0.215883
		0.0304446	-0.027418	-0.0788169	-0.21611
		0.0304367	-0.0276027	-0.0788902	-0.21636
		0.030104	-0.0277101	-0.0790329	-0.216822
		0.0296109	-0.0279183	-0.0790611	-0.217367
		0.0293636	-0.0282404	-0.0791973	-0.217483
		0.0290449	-0.0282563	-0.0792107	-0.217811
		0.0288037	-0.0283457	-0.0792638	-0.218137
		0.0284738	-0.0284342	-0.0793696	-0.218457
		0.028285	-0.0285283	-0.0793951	-0.218591
		0.0275852	-0.0285971	-0.0795674	-0.219083
		0.027223	-0.0286885	-0.0798129	-0.219563
		0.0269233	-0.0289251	-0.0800944	-0.219688
		0.0269058	-0.0289675	-0.0801324	-0.219797
		0.0268789	-0.0289964	-0.0802126	-0.21989
		0.0265763	-0.0291382	-0.0804273	-0.220063
		0.0265297	-0.0291801	-0.0804914	-0.221306
		0.0262272	-0.0292071	-0.0806884	-0.221397
		0.0258426	-0.0292966	-0.0808587	-0.22161
		0.0257851	-0.0293433	-0.0809531	-0.221749
		0.0257405	-0.0293541	-0.0815355	-0.222156
		0.0253732	-0.0295901	-0.0815795	-0.222559
		0.0251039	-0.029684	-0.0816187	-0.222585
		0.0250712	-0.0298448	-0.081761	-0.222631
		0.0246936	-0.0301301	-0.0817899	-0.222945
		0.0246571	-0.0305655	-0.0818516	-0.223381
		0.0246211	-0.0305695	-0.0820723	-0.223413
		0.0244551	-0.0307609	-0.0821233	-0.22381
		0.0244056	-0.0308473	-0.0822182	-0.224061
		0.0239089	-0.0312888	-0.0824003	-0.22447
		0.0239022	-0.0313166	-0.0824829	-0.224867
		0.0235172	-0.0315087	-0.0826059	-0.22487
		0.023492	-0.0315475	-0.0827348	-0.225327
		0.0234215	-0.0316542	-0.0830661	-0.22534
		0.0232428	-0.0319178	-0.0831689	-0.22579
		0.0232213	-0.0319425	-0.0832596	-0.226112
		0.0231398	-0.0319512	-0.0832928	-0.226671
		0.0231391	-0.0322143	-0.083641	-0.226964
		0.0231029	-0.0322212	-0.0838167	-0.227161
		0.0229538	-0.0324673	-0.0838838	-0.227246
		0.022784	-0.032509	-0.0840375	-0.227636
		0.0224597	-0.0328198	-0.0842168	-0.227658
		0.0219088	-0.0331187	-0.0846546	-0.227784
		0.0218485	-0.0340953	-0.0847208	-0.227849
		0.0218085	-0.034177	-0.0848778	-0.2281
		0.021767	-0.0346491	-0.0849748	-0.22815
		0.0215282	-0.0348247	-0.0852017	-0.228438
		0.0209695	-0.0348288	-0.0853913	-0.228557
		0.0203455	-0.0349045	-0.0855756	-0.228738
		0.0199576	-0.0349045	-0.0856784	-0.229811
		0.0198579	-0.0349279	-0.086215	-0.230019
		0.019704	-0.035674	-0.0864189	-0.230916
		0.0196288	-0.035677	-0.0866111	-0.231429
		0.019475	-0.0358382	-0.0867577	-0.231669
		0.0192438	-0.0358688	-0.0867606	-0.231728
		0.0189847	-0.0359471	-0.0871439	-0.231756
		0.0187127	-0.0360412	-0.0872595	-0.232056
		0.0184983	-0.0365288	-0.0872596	-0.232476
		0.0184064	-0.0365976	-0.0873174	-0.233514
		0.0174729	-0.0370194	-0.0873829	-0.233822
		0.0174506	-0.0371161	-0.0874283	-0.234034
		0.0173975	-0.0371369	-0.0877437	-0.234338
		0.0171615	-0.037144	-0.0878236	-0.234383
		0.0171131	-0.0373945	-0.0880568	-0.234716
		0.0168037	-0.0377564	-0.088087	-0.234823
		0.0163288	-0.0377867	-0.0887768	-0.234977
		0.0159652	-0.0378555	-0.0888981	-0.235281
		0.0158989	-0.0379345	-0.0890376	-0.236117
		0.0158528	-0.0379349	-0.0892438	-0.236162
		0.0157559	-0.0385565	-0.0894504	-0.23668
		0.0155766	-0.0386485	-0.0896113	-0.236893
		0.0151263	-0.0387337	-0.0896353	-0.236894
		0.0150335	-0.0388621	-0.0896476	-0.237226
		0.0149561	-0.0389201	-0.0897953	-0.237368
		0.014657	-0.0391621	-0.0899169	-0.238184
		0.0144413	-0.039168	-0.0903267	-0.238241
		0.0144295	-0.0397672	-0.090428	-0.238894
		0.0140828	-0.0397932	-0.090549	-0.239143
		0.0139307	-0.0398791	-0.0909408	-0.239617
		0.013246	-0.0399143	-0.0912836	-0.23976
		0.0132427	-0.0400064	-0.0914163	-0.239783
		0.0131248	-0.0402597	-0.0916236	-0.239954
		0.0126866	-0.0404908	-0.0918527	-0.240541
		0.0120663	-0.0406495	-0.0919889	-0.2409
		0.0114743	-0.0407355	-0.0929025	-0.240971
		0.0114545	-0.0407758	-0.093035	-0.241149
		0.0114286	-0.0409216	-0.0932099	-0.241218
		0.0113696	-0.0410672	-0.0935783	-0.241379
		0.0111535	-0.0410785	-0.0937355	-0.241617
		0.010935	-0.041309	-0.0939453	-0.241695
		0.0103107	-0.0415217	-0.0940149	-0.241717
		0.010304	-0.0415496	-0.0944894	-0.241855
		0.0100826	-0.0417523	-0.0946977	-0.242096
		0.0095249	-0.0419352	-0.0951306	-0.242196
		0.00891685	-0.0420469	-0.0951448	-0.24256
		0.0087749	-0.0421067	-0.0952714	-0.243271
		0.00871746	-0.042142	-0.0952994	-0.243314
		0.00821012	-0.0422103	-0.0953183	-0.243343
		0.00797863	-0.0424185	-0.0953205	-0.243686
		0.0079087	-0.0424674	-0.0956125	-0.243883
		0.00771931	-0.0428964	-0.095628	-0.24408
		0.00738358	-0.042958	-0.0958707	-0.244839
		0.00730105	-0.0431358	-0.0963162	-0.244907
		0.0069914	-0.0433147	-0.0966683	-0.244936
		0.00651879	-0.0434872	-0.0970747	-0.245071
		0.00576312	-0.0436673	-0.0971256	-0.245618
		0.00564521	-0.0437124	-0.0976963	-0.24584
		0.00540386	-0.0440473	-0.0982493	-0.245993
		0.00522076	-0.0440624	-0.0982927	-0.246151
		0.00509724	-0.0441366	-0.0983096	-0.246549
		0.00458714	-0.0442101	-0.0983989	-0.246557
		0.00432664	-0.0444321	-0.0984649	-0.247268
		0.00387771	-0.0445992	-0.098471	-0.247672
		0.00356029	-0.0446675	-0.0986498	-0.247889
		0.00315458	-0.0448096	-0.0987031	-0.247924
		0.00296007	-0.0449567	-0.0990136	-0.247993
		0.0020472	-0.0451965	-0.0991832	-0.248154
		0.00203339	-0.0452302	-0.0993169	-0.248385
		0.00193052	-0.0454689	-0.099481	-0.248516
		0.00136843	-0.0455477	-0.0996276	-0.248588
		0.00109283	-0.0456308	-0.0996678	-0.248717
		0.000922665	-0.0457625	-0.0998396	-0.248927
		0.000633339	-0.0460239	-0.10023	-0.249242
		0.000560257	-0.0460654	-0.10054	-0.249406
		0.000543193	-0.0466983	-0.100727	-0.250037
		7.21e-05	-0.0472528	-0.100808	-0.250273
		-0.000204885	-0.0473727	-0.100953	-0.250411
		-0.000540419	-0.0475529	-0.101035	-0.250487
		-0.000558239	-0.0475759	-0.101054	-0.250959
		-0.000910728	-0.0477409	-0.102053	-0.250984
		-0.00106488	-0.0479006	-0.102963	-0.251194
		-0.00162428	-0.0479734	-0.103415	-0.251714
		-0.00206773	-0.0482234	-0.103425	-0.252372
		-0.00231938	-0.0484064	-0.103511	-0.252762
		-0.0023963	-0.0484134	-0.103664	-0.252903
		-0.00268776	-0.0485339	-0.1042	-0.253929
		-0.00294276	-0.0487439	-0.105039	-0.254029
		-0.00301829	-0.0495829	-0.10529	-0.254357
		-0.00340592	-0.0497361	-0.105599	-0.2548
		-0.0043595	-0.0501958	-0.105762	-0.255136
		-0.0048381	-0.0502727	-0.106177	-0.255463
		-0.00505151	-0.0503028	-0.106308	-0.255823
		-0.00524173	-0.0504358	-0.106577	-0.256172
		-0.00526902	-0.050847	-0.10685	-0.256813
		-0.00567291	-0.0512805	-0.106869	-0.257139
		-0.00586767	-0.0515821	-0.107225	-0.257654
		-0.00601747	-0.0516705	-0.107449	-0.258595
		-0.00645185	-0.0518144	-0.107962	-0.258727
		-0.00647175	-0.0522001	-0.108341	-0.259034
		-0.00648256	-0.0522676	-0.108455	-0.259127
		-0.00658527	-0.052474	-0.108778	-0.259338
		-0.00660535	-0.0526787	-0.10879	-0.259481
		-0.00711709	-0.0529378	-0.109787	-0.25996
		-0.00752188	-0.0529473	-0.110114	-0.260153
		-0.00753815	-0.0529818	-0.110485	-0.261287
		-0.00780005	-0.0531744	-0.110524	-0.261721
		-0.00803293	-0.0533399	-0.110541	-0.261902
		-0.0088726	-0.0533845	-0.110906	-0.261936
		-0.00887345	-0.0534638	-0.110987	-0.261947
		-0.009082	-0.0536153	-0.111645	-0.262169
		-0.0098214	-0.0537969	-0.111697	-0.263236
		-0.0102593	-0.0539298	-0.111914	-0.264526
		-0.0114803	-0.0542306	-0.112161	-0.265014
		-0.0116342	-0.0549167	-0.11228	-0.266097
		-0.0116845	-0.0549443	-0.113003	-0.266162
		-0.0117017	-0.0554337	-0.113009	-0.266324
		-0.0117609	-0.0554436	-0.113191	-0.266811
		-0.0121047	-0.0554684	-0.113363	-0.268471
		-0.0126918	-0.0558448	-0.113677	-0.268897
		-0.0132648	-0.0560468	-0.114211	-0.26903
		-0.0136702	-0.0560489	-0.114221	-0.269758
		-0.014077	-0.0560526	-0.114773	-0.270368
		-0.0141096	-0.0560737	-0.114808	-0.271368
		-0.0142162	-0.0561417	-0.115334	-0.27147
		-0.015008	-0.0561945	-0.115451	-0.27199
		-0.0151062	-0.0562485	-0.115788	-0.272135
		-0.0154033	-0.0562844	-0.115797	-0.272306
		-0.0156653	-0.0566906	-0.116133	-0.272464
		-0.0159476	-0.0568949	-0.116345	-0.27277
		-0.0164055	-0.0569062	-0.116587	-0.273097
		-0.0168518	-0.0573805	-0.116975	-0.273156
		-0.0172425	-0.0576184	-0.11724	-0.273456
		-0.0174247	-0.0579664	-0.117953	-0.274386
		-0.0183126	-0.0580502	-0.118153	-0.274428
		-0.018421	-0.0582185	-0.118268	-0.27529
		-0.0193925	-0.0583939	-0.118486	-0.275301
		-0.0197386	-0.0584112	-0.118628	-0.275321
		-0.0197626	-0.0584404	-0.118634	-0.275406
		-0.019975	-0.0584945	-0.11875	-0.276005
		-0.0203623	-0.0585114	-0.119348	-0.276703
		-0.0206974	-0.0585554	-0.11942	-0.277071
		-0.020852	-0.0585711	-0.11945	-0.278206
		-0.0208946	-0.0589292	-0.11985	-0.278469
		-0.0214043	-0.059128	-0.120209	-0.278804
		-0.0218965	-0.0591827	-0.120371	-0.279149
		-0.022369	-0.0594016	-0.120418	-0.279603
		-0.0228175	-0.0594389	-0.120499	-0.279825
		-0.0228883	-0.0597938	-0.120741	-0.281081
		-0.0229035	-0.0599672	-0.121057	-0.281159
		-0.0237552	-0.0602499	-0.121263	-0.282624
		-0.0238065	-0.0603689	-0.121332	-0.282958
		-0.023903	-0.0605286	-0.121361	-0.283273
		-0.0249347	-0.0606346	-0.121825	-0.284073
		-0.0249502	-0.0611511	-0.12194	-0.284418
		-0.0251877	-0.0613806	-0.122433	-0.284622
		-0.0257093	-0.0618667	-0.122449	-0.285043
		-0.0257302	-0.061873	-0.123216	-0.285154
		-0.0257689	-0.0620519	-0.123419	-0.286135
		-0.0257798	-0.0624119	-0.123985	-0.286527
		-0.0261807	-0.0624358	-0.124218	-0.28672
		-0.0262692	-0.0624633	-0.124583	-0.286821
		-0.0264188	-0.0625611	-0.124949	-0.287099
		-0.0270313	-0.062577	-0.125515	-0.287385
		-0.0272734	-0.0628833	-0.125756	-0.28751
		-0.0276915	-0.0629882	-0.125821	-0.287611
		-0.0279382	-0.0630339	-0.125967	-0.288816
		-0.0279881	-0.0631444	-0.126397	-0.290609
		-0.0283622	-0.0631457	-0.126604	-0.290832
		-0.028742	-0.0635626	-0.126804	-0.292151
		-0.0287441	-0.0636824	-0.12688	-0.292325
		-0.0294763	-0.0639298	-0.126931	-0.292348
		-0.0296294	-0.0640612	-0.127004	-0.292531
		-0.0312585	-0.0642836	-0.127498	-0.292582
		-0.0313778	-0.0644309	-0.127546	-0.292837
		-0.0314509	-0.0653263	-0.127722	-0.293262
		-0.0318414	-0.0653717	-0.128207	-0.293477
		-0.0323159	-0.0656708	-0.128476	-0.293495
		-0.0325699	-0.0658085	-0.128499	-0.295066
		-0.0327092	-0.0658654	-0.128799	-0.295393
		-0.0331096	-0.0659617	-0.128822	-0.295511
		-0.0336018	-0.0660071	-0.128861	-0.296026
		-0.0343779	-0.0660268	-0.128861	-0.296207
		-0.0343873	-0.0660548	-0.129129	-0.298312
		-0.0344722	-0.0662054	-0.129654	-0.298318
		-0.0345572	-0.0662306	-0.130003	-0.299865
		-0.0352335	-0.0664305	-0.130112	-0.300834
		-0.0369508	-0.066619	-0.130298	-0.301044
		-0.0370484	-0.0667092	-0.130391	-0.301102
		-0.037089	-0.0671235	-0.130653	-0.30204
		-0.0384706	-0.0672112	-0.130924	-0.302137
		-0.0387712	-0.0675729	-0.130996	-0.302345
		-0.0387922	-0.0676525	-0.131092	-0.302491
		-0.0388154	-0.0681753	-0.131349	-0.303447
		-0.0388754	-0.0690642	-0.131482	-0.303577
		-0.0394565	-0.0700655	-0.131825	-0.303905
		-0.0397658	-0.0707487	-0.132505	-0.304355
		-0.039801	-0.0707745	-0.132559	-0.305042
		-0.0411368	-0.0707816	-0.132877	-0.30555
		-0.0414534	-0.0709079	-0.132955	-0.305688
		-0.0414853	-0.0710926	-0.133453	-0.305853
		-0.041934	-0.0717807	-0.133758	-0.306145
		-0.0430354	-0.0718153	-0.134073	-0.306493
		-0.0430404	-0.071911	-0.134086	-0.306886
		-0.0433234	-0.0720207	-0.134113	-0.307613
		-0.0434829	-0.0721589	-0.134156	-0.30795
		-0.0436452	-0.0722045	-0.134631	-0.308737
		-0.0438304	-0.072261	-0.135239	-0.309709
		-0.0442106	-0.0727885	-0.135516	-0.31087
		-0.044248	-0.0732031	-0.135548	-0.311288
		-0.0448158	-0.0734367	-0.135599	-0.311289
		-0.0449073	-0.0738011	-0.135629	-0.311384
		-0.0454247	-0.0740403	-0.137609	-0.311731
		-0.0456473	-0.0741182	-0.13774	-0.312039
		-0.0456682	-0.0742349	-0.137911	-0.312756
		-0.0461012	-0.0742723	-0.138312	-0.313004
		-0.0463527	-0.0744475	-0.138598	-0.314142
		-0.0468761	-0.0753816	-0.139028	-0.316144
		-0.04715	-0.0754947	-0.139083	-0.316651
		-0.047564	-0.0755535	-0.139135	-0.317364
		-0.0479288	-0.075729	-0.139386	-0.317473
		-0.0488796	-0.0759534	-0.139857	-0.318553
		-0.0490392	-0.0760466	-0.139979	-0.319613
		-0.0491381	-0.0763358	-0.14011	-0.322733
		-0.0495135	-0.0764945	-0.140872	-0.323024
		-0.0496583	-0.0765955	-0.140941	-0.323188
		-0.0498494	-0.0767609	-0.141039	-0.323276
		-0.0499245	-0.0767652	-0.141287	-0.324479
		-0.0500451	-0.0769979	-0.1414	-0.324665
		-0.0506664	-0.0772588	-0.141727	-0.326366
		-0.0519927	-0.0781689	-0.141896	-0.327529
		-0.0522976	-0.0782488	-0.141974	-0.327768
		-0.0526505	-0.0783777	-0.14202	-0.328315
		-0.0528527	-0.0784916	-0.142518	-0.328464
		-0.0533113	-0.0786061	-0.142573	-0.328519
		-0.0534825	-0.078633	-0.142732	-0.328535
		-0.0537748	-0.0787534	-0.143025	-0.328755
		-0.0545784	-0.0788499	-0.143516	-0.330477
		-0.0549686	-0.079263	-0.143528	-0.3316
		-0.0564273	-0.0793024	-0.14382	-0.331903
		-0.0566471	-0.0794833	-0.144988	-0.33242
		-0.0568534	-0.0800733	-0.145039	-0.332571
		-0.0582387	-0.0801122	-0.145175	-0.332832
		-0.0586473	-0.0802237	-0.145296	-0.333466
		-0.0587478	-0.0803855	-0.145839	-0.334012
		-0.0588393	-0.0805345	-0.146036	-0.334045
		-0.0589126	-0.080617	-0.146077	-0.335509
		-0.0589821	-0.0807161	-0.14614	-0.336667
		-0.0590692	-0.080841	-0.146412	-0.336689
		-0.0595544	-0.0808691	-0.146735	-0.336782
		-0.0599128	-0.0808989	-0.146939	-0.336874
		-0.0602387	-0.0810324	-0.147265	-0.33764
		-0.0604839	-0.0812347	-0.14732	-0.338339
		-0.0606306	-0.081387	-0.148608	-0.338403
		-0.0606712	-0.0815031	-0.149066	-0.338473
		-0.0610251	-0.0817052	-0.149498	-0.338761
		-0.061184	-0.0824517	-0.149681	-0.339498
		-0.0613564	-0.0825351	-0.149905	-0.340476
		-0.0652368	-0.083147	-0.149926	-0.340496
		-0.0653727	-0.083638	-0.150833	-0.340916
		-0.065456	-0.084132	-0.151389	-0.341428
		-0.0657902	-0.084366	-0.151595	-0.341804
		-0.0661858	-0.0848561	-0.152677	-0.342177
		-0.0667223	-0.0850381	-0.153038	-0.342543
		-0.0696275	-0.085206	-0.153084	-0.342678
		-0.0697954	-0.0857412	-0.153527	-0.343003
		-0.0705222	-0.0858527	-0.153727	-0.343275
		-0.0708988	-0.0858874	-0.153774	-0.343317
		-0.0710266	-0.0860762	-0.154588	-0.343554
		-0.071287	-0.0861344	-0.154988	-0.344813
		-0.071582	-0.0861735	-0.155029	-0.346719
		-0.0721992	-0.0862742	-0.155301	-0.347098
		-0.0724431	-0.086436	-0.15606	-0.348321
		-0.0725046	-0.0864584	-0.156298	-0.34993
		-0.0728353	-0.0865719	-0.15735	-0.34994
		-0.0739403	-0.0866419	-0.157433	-0.350127
		-0.0743691	-0.086892	-0.157434	-0.350865
		-0.0744248	-0.0872878	-0.158249	-0.352008
		-0.0745119	-0.0875382	-0.158983	-0.352324
		-0.0746019	-0.0875522	-0.15928	-0.353173
		-0.0759841	-0.0875764	-0.159569	-0.353183
		-0.0763843	-0.088166	-0.160238	-0.353666
		-0.0771319	-0.0882385	-0.161082	-0.354588
		-0.0790359	-0.0883422	-0.161386	-0.354599
		-0.0793645	-0.0892217	-0.161988	-0.354832
		-0.0796416	-0.0894206	-0.162482	-0.354876
		-0.0798903	-0.0897383	-0.162643	-0.356661
		-0.0800301	-0.0898431	-0.162846	-0.3572
		-0.0805865	-0.0901439	-0.163402	-0.357562
		-0.0817389	-0.0903941	-0.164176	-0.357802
		-0.0819159	-0.0904794	-0.166073	-0.357908
		-0.0827025	-0.0905565	-0.16617	-0.358542
		-0.0842836	-0.0906707	-0.16668	-0.358659
		-0.0846297	-0.090804	-0.167558	-0.358752
		-0.0863777	-0.0908459	-0.167733	-0.359644
		-0.0872906	-0.0921548	-0.167979	-0.360612
		-0.0877577	-0.0924741	-0.168475	-0.36094
		-0.0881897	-0.0931085	-0.168948	-0.361816
		-0.0882959	-0.0935563	-0.169104	-0.362472
		-0.0889693	-0.0939062	-0.169239	-0.363626
		-0.089676	-0.0939539	-0.170326	-0.363797
		-0.0900648	-0.0939915	-0.170978	-0.363905
		-0.0902023	-0.0941983	-0.171379	-0.366481
		-0.0905203	-0.0943497	-0.171782	-0.366719
		-0.0908604	-0.0945216	-0.171786	-0.366723
		-0.0917863	-0.0946614	-0.171799	-0.366915
		-0.0924177	-0.0950903	-0.171891	-0.367205
		-0.0925895	-0.0951317	-0.172069	-0.367236
		-0.092675	-0.095357	-0.172328	-0.367575
		-0.0929309	-0.0954173	-0.173085	-0.368233
		-0.0929677	-0.0956303	-0.17337	-0.369371
		-0.0933549	-0.0958026	-0.173437	-0.370184
		-0.0943675	-0.0966858	-0.174052	-0.370388
		-0.0945815	-0.0970599	-0.1742	-0.370978
		-0.0961072	-0.0975055	-0.175446	-0.371731
		-0.0963705	-0.0984099	-0.175505	-0.372269
		-0.0980766	-0.0985449	-0.17599	-0.372676
		-0.098609	-0.0987667	-0.176031	-0.372781
		-0.0987288	-0.0990389	-0.176481	-0.372807
		-0.0990205	-0.0991335	-0.176726	-0.372988
		-0.0991485	-0.0995065	-0.177696	-0.37443
		-0.0994515	-0.0996116	-0.177826	-0.374849
		-0.0996537	-0.0997654	-0.178303	-0.375552
		-0.101067	-0.100448	-0.178838	-0.375851
		-0.101127	-0.100652	-0.178881	-0.375901
		-0.10116	-0.101054	-0.179095	-0.37908
		-0.101508	-0.101063	-0.179937	-0.37922
		-0.101845	-0.101246	-0.180986	-0.380722
		-0.102303	-0.101349	-0.181115	-0.381097
		-0.102308	-0.101412	-0.181168	-0.381418
		-0.102563	-0.101414	-0.181691	-0.384407
		-0.102853	-0.101572	-0.18179	-0.387389
		-0.103172	-0.101777	-0.182174	-0.387645
		-0.103287	-0.102592	-0.182332	-0.38805
		-0.103724	-0.102756	-0.183432	-0.389596
		-0.104458	-0.102776	-0.183579	-0.3898
		-0.104868	-0.102886	-0.183746	-0.390835
		-0.105628	-0.103381	-0.184144	-0.390943
		-0.105675	-0.103424	-0.184514	-0.392322
		-0.106993	-0.103566	-0.185625	-0.393545
		-0.107955	-0.103815	-0.185684	-0.393673
		-0.10825	-0.103841	-0.185821	-0.394559
		-0.108477	-0.104046	-0.186171	-0.395148
		-0.108571	-0.104495	-0.186374	-0.398087
		-0.108631	-0.104707	-0.186391	-0.398156
		-0.108849	-0.104975	-0.186626	-0.398431
		-0.109352	-0.105396	-0.188468	-0.400237
		-0.109729	-0.105531	-0.18848	-0.400419
		-0.109878	-0.106161	-0.188701	-0.400952
		-0.110254	-0.106204	-0.188736	-0.401044
		-0.110609	-0.106393	-0.189017	-0.401429
		-0.112406	-0.106399	-0.189078	-0.403923
		-0.113045	-0.106509	-0.189164	-0.405002
		-0.114072	-0.106826	-0.189329	-0.407228
		-0.114107	-0.106944	-0.189864	-0.407583
		-0.114386	-0.107109	-0.189978	-0.407709
		-0.11475	-0.107176	-0.190674	-0.410615
		-0.115274	-0.107396	-0.190699	-0.410699
		-0.117255	-0.107793	-0.190717	-0.411847
		-0.11776	-0.107798	-0.190806	-0.41455
		-0.118275	-0.107806	-0.190992	-0.416646
		-0.118926	-0.108235	-0.191613	-0.418015
		-0.119082	-0.108277	-0.192058	-0.418093
		-0.11929	-0.108459	-0.192261	-0.418105
		-0.119343	-0.108691	-0.194205	-0.419592
		-0.119343	-0.108715	-0.194678	-0.420909
		-0.119489	-0.108864	-0.195001	-0.421045
		-0.119718	-0.108994	-0.195959	-0.421755
		-0.119855	-0.109536	-0.196105	-0.4239
		-0.119987	-0.109765	-0.196213	-0.424971
		-0.12015	-0.109786	-0.196221	-0.426246
		-0.120612	-0.109827	-0.197846	-0.42628
		-0.121306	-0.109982	-0.19872	-0.426398
		-0.121451	-0.110262	-0.200771	-0.426413
		-0.121829	-0.110475	-0.201178	-0.427967
		-0.122206	-0.110716	-0.201787	-0.428589
		-0.122678	-0.110779	-0.202008	-0.432248
		-0.122885	-0.111068	-0.202363	-0.433047
		-0.124427	-0.111241	-0.202764	-0.434263
		-0.124472	-0.111727	-0.203158	-0.436635
		-0.125259	-0.112168	-0.203854	-0.43905
		-0.125416	-0.112409	-0.203928	-0.439631
		-0.125487	-0.112633	-0.205143	-0.440599
		-0.1263	-0.112861	-0.205308	-0.442364
		-0.126306	-0.113101	-0.206495	-0.443847
		-0.12648	-0.114488	-0.208388	-0.444823
		-0.126526	-0.114492	-0.208392	-0.445749
		-0.12733	-0.114731	-0.20865	-0.445952
		-0.127649	-0.115142	-0.209322	-0.447613
		-0.128272	-0.11605	-0.209922	-0.447821
		-0.128868	-0.116636	-0.21004	-0.447928
		-0.130095	-0.116814	-0.211436	-0.448385
		-0.130124	-0.116944	-0.211706	-0.448671
		-0.130124	-0.117081	-0.211844	-0.450125
		-0.130362	-0.117114	-0.211982	-0.453367
		-0.131378	-0.117116	-0.212095	-0.453798
		-0.132314	-0.117197	-0.213397	-0.453819
		-0.13273	-0.11763	-0.21467	-0.454178
		-0.13282	-0.117829	-0.214794	-0.454797
		-0.133034	-0.118136	-0.214935	-0.455555
		-0.134566	-0.118608	-0.214959	-0.455617
		-0.134778	-0.118779	-0.215267	-0.456751
		-0.135329	-0.119378	-0.217208	-0.460419
		-0.13572	-0.119589	-0.217792	-0.460589
		-0.136281	-0.119645	-0.217968	-0.462427
		-0.136388	-0.119663	-0.218721	-0.463884
		-0.136705	-0.119709	-0.220274	-0.464026
		-0.136849	-0.119841	-0.22234	-0.464636
		-0.136986	-0.120502	-0.223288	-0.464903
		-0.13749	-0.120504	-0.223882	-0.465979
		-0.137547	-0.120533	-0.224948	-0.466999
		-0.138194	-0.120974	-0.225524	-0.467394
		-0.139084	-0.121194	-0.225898	-0.468935
		-0.139444	-0.121499	-0.226695	-0.469748
		-0.139465	-0.121796	-0.227222	-0.469961
		-0.140026	-0.12287	-0.227259	-0.47011
		-0.141181	-0.123085	-0.227561	-0.470506
		-0.141207	-0.1232	-0.227669	-0.475602
		-0.14218	-0.123542	-0.227806	-0.476429
		-0.142609	-0.123589	-0.228103	-0.477358
		-0.14287	-0.123688	-0.228195	-0.477545
		-0.143656	-0.124129	-0.22825	-0.478184
		-0.144051	-0.124498	-0.22838	-0.479967
		-0.144759	-0.124748	-0.229884	-0.481304
		-0.146165	-0.125052	-0.230078	-0.481387
		-0.146799	-0.125131	-0.230723	-0.482629
		-0.14687	-0.125459	-0.23105	-0.483087
		-0.147401	-0.126409	-0.231507	-0.483269
		-0.147612	-0.12643	-0.232007	-0.485537
		-0.148115	-0.126511	-0.232014	-0.487407
		-0.148198	-0.126635	-0.232739	-0.48876
		-0.148555	-0.126882	-0.232795	-0.48891
		-0.148701	-0.126899	-0.233293	-0.489084
		-0.148728	-0.127469	-0.236173	-0.489963
		-0.148827	-0.127621	-0.236221	-0.490407
		-0.149162	-0.127981	-0.239412	-0.491316
		-0.149195	-0.12825	-0.239436	-0.491793
		-0.149868	-0.128567	-0.239909	-0.4962
		-0.149921	-0.128626	-0.240009	-0.496621
		-0.150149	-0.128852	-0.240286	-0.49768
		-0.150202	-0.130561	-0.240699	-0.500089
		-0.150511	-0.13057	-0.241722	-0.502101
		-0.15087	-0.130581	-0.243544	-0.502457
		-0.151004	-0.130617	-0.244165	-0.502586
		-0.151628	-0.130995	-0.244193	-0.50278
		-0.151877	-0.131329	-0.244914	-0.503191
		-0.152072	-0.131351	-0.2452	-0.503324
		-0.152766	-0.131412	-0.245543	-0.503975
		-0.152914	-0.131425	-0.246239	-0.505442
		-0.153192	-0.13151	-0.248754	-0.505547
		-0.154103	-0.131797	-0.249043	-0.50574
		-0.15421	-0.131897	-0.249417	-0.505819
		-0.154943	-0.132024	-0.249743	-0.505956
		-0.155329	-0.132249	-0.250838	-0.506134
		-0.156095	-0.132293	-0.251399	-0.50789
		-0.158762	-0.132487	-0.252873	-0.512087
		-0.15941	-0.132837	-0.253082	-0.51213
		-0.160324	-0.13335	-0.253754	-0.512738
		-0.16069	-0.134043	-0.255102	-0.513243
		-0.161406	-0.134124	-0.255318	-0.515769
		-0.162647	-0.134992	-0.255362	-0.518427
		-0.162765	-0.135979	-0.25608	-0.519687
		-0.162817	-0.136121	-0.256317	-0.522237
		-0.163298	-0.13617	-0.25726	-0.524355
		-0.163722	-0.137133	-0.257565	-0.525483
		-0.163961	-0.137546	-0.257762	-0.526185
		-0.164675	-0.137743	-0.258749	-0.52841
		-0.166431	-0.138076	-0.25976	-0.529299
		-0.167523	-0.138238	-0.25989	-0.53311
		-0.16775	-0.13848	-0.260522	-0.533805
		-0.16778	-0.13866	-0.261702	-0.541653
		-0.168911	-0.139031	-0.263354	-0.543402
		-0.169667	-0.139591	-0.265381	-0.543717
		-0.171055	-0.139639	-0.266054	-0.544511
		-0.171191	-0.139806	-0.266392	-0.54496
		-0.172228	-0.140022	-0.266746	-0.545726
		-0.172617	-0.1409	-0.267029	-0.547866
		-0.173263	-0.140937	-0.269725	-0.548267
		-0.173825	-0.140953	-0.270203	-0.550274
		-0.173965	-0.141004	-0.271564	-0.550334
		-0.174192	-0.141166	-0.271944	-0.550796
		-0.174515	-0.142262	-0.272147	-0.552662
		-0.174609	-0.142661	-0.274613	-0.553077
		-0.175333	-0.142914	-0.276568	-0.553092
		-0.175564	-0.143295	-0.276607	-0.553256
		-0.177418	-0.143296	-0.285475	-0.554947
		-0.177667	-0.144206	-0.286381	-0.556465
		-0.177879	-0.14482	-0.288121	-0.558353
		-0.178132	-0.145194	-0.288272	-0.559587
		-0.179584	-0.145548	-0.292107	-0.55968
		-0.179798	-0.145611	-0.293728	-0.560758
		-0.180238	-0.145878	-0.29402	-0.561617
		-0.180715	-0.146004	-0.295802	-0.566656
		-0.180875	-0.146967	-0.297993	-0.570743
		-0.181828	-0.147701	-0.300263	-0.571562
		-0.182612	-0.149323	-0.301155	-0.571798
		-0.18331	-0.149752	-0.301191	-0.571926
		-0.183487	-0.149916	-0.301326	-0.572031
		-0.183806	-0.150371	-0.302559	-0.57913
		-0.185615	-0.150716	-0.302649	-0.579714
		-0.186532	-0.150765	-0.303044	-0.585847
		-0.186536	-0.151632	-0.306569	-0.587358
		-0.187169	-0.152382	-0.307028	-0.58953
		-0.187271	-0.152791	-0.307097	-0.596754
		-0.188224	-0.152853	-0.307684	-0.59749
		-0.188978	-0.15316	-0.309382	-0.598014
		-0.189545	-0.153325	-0.310423	-0.598886
		-0.189602	-0.153999	-0.311495	-0.601571
		-0.190899	-0.154745	-0.312461	-0.610008
		-0.193998	-0.155048	-0.313477	-0.612125
		-0.195433	-0.155866	-0.313691	-0.61888
		-0.197141	-0.155949	-0.313874	-0.62136
		-0.197286	-0.156133	-0.316922	-0.621847
		-0.197532	-0.156528	-0.317816	-0.622513
		-0.197585	-0.157252	-0.318187	-0.622627
		-0.199102	-0.157765	-0.31958	-0.625089
		-0.199444	-0.158013	-0.320207	-0.625248
		-0.199857	-0.158127	-0.32415	-0.626147
		-0.200243	-0.158353	-0.329727	-0.627668
		-0.200748	-0.158775	-0.329753	-0.629054
		-0.200907	-0.15914	-0.33026	-0.632656
		-0.204512	-0.159307	-0.331901	-0.642083
		-0.20472	-0.159567	-0.332241	-0.648611
		-0.205574	-0.159741	-0.336589	-0.652988
		-0.206939	-0.159852	-0.338494	-0.653331
		-0.207893	-0.159994	-0.339686	-0.656187
		-0.208332	-0.16029	-0.340221	-0.6607
		-0.208589	-0.160383	-0.340766	-0.662088
		-0.208782	-0.161247	-0.343084	-0.664625
		-0.208923	-0.161321	-0.344	-0.665768
		-0.209296	-0.161323	-0.344219	-0.667389
		-0.209712	-0.16138	-0.345055	-0.669733
		-0.209787	-0.161917	-0.345432	-0.680861
		-0.21183	-0.162283	-0.351044	-0.681192
		-0.211857	-0.162651	-0.357811	-0.682466
		-0.211956	-0.164028	-0.361502	-0.682849
		-0.212411	-0.164079	-0.361906	-0.684844
		-0.214569	-0.164464	-0.364316	-0.688902
		-0.216009	-0.164779	-0.370452	-0.691373
		-0.216337	-0.165485	-0.377876	-0.694294
		-0.217489	-0.165546	-0.382411	-0.696478
		-0.218205	-0.165792	-0.386984	-0.696596
		-0.219215	-0.167403	-0.387183	-0.705509
		-0.219504	-0.168144	-0.390933	-0.70704
		-0.220001	-0.168497	-0.395012	-0.716137
		-0.220286	-0.168911	-0.395106	-0.717527
		-0.221008	-0.171429	-0.398373	-0.718173
		-0.221048	-0.171444	-0.399245	-0.719131
		-0.222048	-0.172898	-0.400295	-0.719428
		-0.222465	-0.172989	-0.402847	-0.722197
		-0.22249	-0.173714	-0.403014	-0.745105
		-0.222609	-0.173925	-0.403791	-0.749987
		-0.223054	-0.173995	-0.403876	-0.751332
		-0.223235	-0.174429	-0.405721	-0.756938
		-0.224191	-0.175416	-0.407452	-0.757664
		-0.224352	-0.175624	-0.416417	-0.758391
		-0.224405	-0.175846	-0.426172	-0.758489
		-0.22557	-0.176232	-0.429403	-0.762167
		-0.226201	-0.17685	-0.433648	-0.762478
		-0.226333	-0.176946	-0.440417	-0.773448
		-0.226738	-0.177492	-0.444668	-0.789425
		-0.227863	-0.177746	-0.447237	-0.791685
		-0.229249	-0.177885	-0.450106	-0.791869
		-0.229669	-0.178071	-0.463977	-0.79711
		-0.230578	-0.178724	-0.472424	-0.797269
		-0.230695	-0.178746	-0.485577	-0.811497
		-0.231131	-0.178827	-0.488994	-0.820034
		-0.231666	-0.178832	-0.507161	-0.825975
		-0.231739	-0.178873	-0.518501	-0.830255
		-0.231961	-0.179433	-0.519842	-0.840246
		-0.232183	-0.180199	-0.535303	-0.841654
		-0.232479	-0.180775	-0.550242	-0.8507
		-0.232835	-0.18115	-0.554266	-0.859532
		-0.233163	-0.181471	-0.572831	-0.871587
		-0.233252	-0.181537	-0.594762	-0.875112
		-0.233987	-0.182183	-0.626207	-0.884268
		-0.234406	-0.182654	-0.791029	-0.893702
		-0.235509	-0.182878	-0.87278	-0.896583
		-0.235557	-0.183258	-0.940554	-0.898276
		-0.23658	-0.18386	-0.988659	-0.898998
		-0.238041	-0.185169		-0.905514
		-0.238128	-0.185805		-0.908221
		-0.239543	-0.185916		-0.909648
		-0.240091	-0.186343		-0.911777
		-0.240271	-0.186528		-0.930936
		-0.240401	-0.186961		-0.947821
		-0.242079	-0.18708		-0.95247
		-0.243442	-0.187253		-0.984115
		-0.243832	-0.187802		-0.984774
		-0.245073	-0.188138		-0.99479
		-0.245417	-0.188387		-0.995825
		-0.245443	-0.189352		-0.996088
		-0.246167	-0.189777		-1.00934
		-0.247374	-0.190412		-1.01554
		-0.247937	-0.190415		-1.017
		-0.24879	-0.1905		-1.02613
		-0.249141	-0.190887		-1.05859
		-0.249215	-0.191355		-1.06549
		-0.249297	-0.191464		-1.08305
		-0.250007	-0.192157		-1.08549
		-0.250234	-0.192157		-1.08572
		-0.250283	-0.193073		-1.10401
		-0.251205	-0.19375		-1.11614
		-0.251675	-0.194468		-1.15742
		-0.252568	-0.194872		-1.20223
		-0.252619	-0.194975		-1.20515
		-0.252709	-0.19509		-1.21345
		-0.25327	-0.196466		-1.2847
		-0.253645	-0.196516		-1.31419
		-0.254233	-0.196648		-1.31851
		-0.254398	-0.198785		-1.34937
		-0.254511	-0.199245		-1.38849
		-0.255146	-0.199301		-1.39312
		-0.256484	-0.199691		-1.41714
		-0.256835	-0.199695		-1.48531
		-0.257269	-0.199949		-1.52296
		-0.25829	-0.200167		-1.62392
		-0.258336	-0.201363		-1.63471
		-0.258713	-0.201421		-1.81453
		-0.258833	-0.201604		-1.86566
		-0.262519	-0.201756		-1.95539
		-0.264078	-0.202496		-2.02728
		-0.264186	-0.202632		-2.21488
		-0.264759	-0.202694		-2.26249
		-0.265315	-0.202917		-2.35148
		-0.265928	-0.203077		-2.44507
		-0.265941	-0.2031		-2.53491
		-0.266026	-0.204046		-2.65441
		-0.266063	-0.204216		-2.75796
		-0.268559	-0.204698		-3.07347
		-0.26915	-0.205401		-3.49665
		-0.269244	-0.205883		-3.79552
		-0.269986	-0.206068		-3.935
		-0.270341	-0.206525		-4.00883
		-0.271172	-0.207847		-5.69743
		-0.271366	-0.208898		-9.17712
		-0.271599	-0.209009
		-0.27327	-0.209594
		-0.27496	-0.209869
		-0.280153	-0.210368
		-0.280444	-0.210384
		-0.280919	-0.210978
		-0.281417	-0.211134
		-0.282022	-0.211605
		-0.284111	-0.211889
		-0.285494	-0.213165
		-0.285625	-0.213205
		-0.28869	-0.213692
		-0.291242	-0.213827
		-0.292611	-0.213914
		-0.293951	-0.214711
		-0.294873	-0.215231
		-0.29505	-0.215961
		-0.298885	-0.215988
		-0.301557	-0.216797
		-0.30371	-0.218317
		-0.304907	-0.21848
		-0.305613	-0.219703
		-0.306744	-0.220214
		-0.30694	-0.220342
		-0.308059	-0.220955
		-0.310367	-0.220961
		-0.311254	-0.222808
		-0.313019	-0.223109
		-0.314241	-0.22325
		-0.316277	-0.223424
		-0.317423	-0.223901
		-0.322804	-0.224054
		-0.324325	-0.224998
		-0.326353	-0.225062
		-0.326423	-0.226358
		-0.32712	-0.226546
		-0.33032	-0.226599
		-0.331879	-0.226646
		-0.333948	-0.226704
		-0.339215	-0.227064
		-0.340006	-0.22708
		-0.341364	-0.227098
		-0.341435	-0.228149
		-0.341465	-0.231344
		-0.342184	-0.231456
		-0.344775	-0.232407
		-0.345254	-0.23274
		-0.346417	-0.232993
		-0.347288	-0.234147
		-0.349758	-0.234495
		-0.350897	-0.234702
		-0.351945	-0.235517
		-0.353344	-0.236325
		-0.354327	-0.236619
		-0.359331	-0.236911
		-0.359332	-0.237774
		-0.35986	-0.238692
[truncated: 321 more rows]
