# Supplementary material for: Tight bending of the Ndc80 complex provides intrinsic regulation of its binding to microtubules
Source: eLife. 2019 May 2;8:e44489. doi: 10.7554/eLife.44489 (PMC6516834; doi:10.7554/eLife.44489)
Supplement: Figure 4—source data 1. [file elife-44489-fig4-data1.xlsx]

## Sheet: Sheet1
Figure 4-source data 1	4 days, 6 slides	2 days, 3 slides			3 days, 3 slides	3 days, 3 slides
corrected FRET values within histograms	Ndc80	Ndc80 del 490-510		Residence Times	Ndc80	Ndc80 del 490-510
	1.1681	48.2001			6.3	1.5
	1.1266	27.539			15.9	0.8
	1.11795	5.42999			1.2	2.4
	1.11671	4.21703			0.6	0.2
	1.10166	3.9866			0.4	0.1
	1.07816	1.02752			0.1	1
	1.0755	0.997611			0.4	0.1
	1.0691	0.984279			0.2	0.1
	1.06809	0.981379			0.2	0.4
	1.06687	0.974681			0.5	0.4
	1.06496	0.967061			1.7	1
	1.05791	0.966725			0.1	0.5
	1.05675	0.956541			0.1	0.5
	1.05609	0.953322			1.3	0.1
	1.05563	0.951996			0.9	1.1
	1.05224	0.950574			0.4	0.1
	1.05093	0.945566			2.8	0.9
	1.04592	0.940354			0.7	0.7
	1.04379	0.935479			1.7	0.4
	1.03625	0.931704			0.7	0.2
	1.03536	0.928454			0.9	2.6
	1.03317	0.927686			0.4	11.8
	1.03245	0.91729			4.5	0.7
	1.03064	0.915894			2.4	1.2
	1.02884	0.911807			0.1	0.1
	1.02871	0.901434			0.5	0.2
	1.02585	0.901027			0.4	0.3
	1.02427	0.89828			0.3	0.5
	1.01932	0.896331			0.2	0.2
	1.01824	0.89567			0.4	0.9
	1.01647	0.889401			0.1	74.9
	1.0132	0.888894			0.4	0.1
	1.00906	0.876707			0.1	0.4
	1.00892	0.873776			0.8	1.7
	1.00854	0.870594			0.2	0.3
	1.00752	0.868109			0.5	1.2
	1.0066	0.860709			1	2
	1.00631	0.858129			0.4	1
	1.0029	0.856202			0.1	0.1
	1.00245	0.853447			0.2	0.1
	0.999136	0.851372			0.1	1.2
	0.997579	0.848914			1	0.5
	0.992406	0.843396			8	0.2
	0.992114	0.84143			0.2	27.1
	0.990875	0.837747			0.2	0.3
	0.990359	0.837576			1.5	0.5
	0.989659	0.835558			0.1	63.9
	0.988756	0.834119			0.7	1.1
	0.988296	0.833859			1.2	0.2
	0.988144	0.829039			1.2	0.3
	0.986805	0.821737			2.3	0.6
	0.986011	0.819133			1	0.1
	0.98556	0.813724			0.2	0.5
	0.983453	0.810548			0.9	0.1
	0.981241	0.809862			0.9	0.4
	0.981133	0.807821			0.2	0.2
	0.980682	0.803817			0.7	0.3
	0.980532	0.801395			1.4	0.3
	0.97843	0.796047			1.6	0.8
	0.975761	0.795578			1.1	0.9
	0.974771	0.789756			2.4	1.4
	0.974223	0.789172			4	0.7
	0.973651	0.776036			0.5	3.4
	0.971861	0.773555			0.6	8.4
	0.969245	0.773319			0.8	1.8
	0.969084	0.772243			0.1	1.1
	0.966128	0.769421			0.5	0.1
	0.964905	0.768584			0.5	5.8
	0.964168	0.767794			0.3	0.4
	0.963142	0.766304			7.2	8.3
	0.957682	0.764473			1	1.3
	0.957414	0.760722			0.8	0.1
	0.956532	0.745315			1.3	0.4
	0.955807	0.726049			15.1	1.7
	0.955067	0.716128			18.5	4.8
	0.95399	0.71395			0.7	0.6
	0.952722	0.709021			1.4	0.1
	0.950265	0.696701			1.6	0.1
	0.949156	0.694882			1.6	0.2
	0.948573	0.684328			0.7	0.5
	0.947774	0.679238			0.1	44.6
	0.946814	0.655669			0.5	0.7
	0.945164	0.64417			4.3	18.9
	0.943321	0.637219			1	0.5
	0.943089	0.611057			0.3	0.5
	0.941562	0.610036			0.2	0.6
	0.939346	0.609004			0.2	1.7
	0.939081	0.608389			0.7	3.7
	0.937867	0.599306			1.4	3
	0.937655	0.593032			0.1	0.8
	0.937635	0.59008			0.1	1.8
	0.93395	0.57764			3.4	0.7
	0.933142	0.576328			0.3	0.8
	0.932212	0.569269			0.1	0.4
	0.931381	0.56202			4.9	1
	0.928463	0.5557			0.3	0.1
	0.926658	0.554797			1.4	0.2
	0.92022	0.554368			80.1	0.1
	0.916829	0.551343			0.3	0.4
	0.916518	0.546354			1.1	0.4
	0.915683	0.543917			6.3	2.1
	0.914009	0.53956			0.6	6
	0.909064	0.538478			6.4	0.2
	0.907867	0.530916			4.3	12.8
	0.904025	0.528705			0.2	9.3
	0.899606	0.516269			0.2	0.6
	0.891849	0.51497			0.3	0.7
	0.890427	0.507769			3.1	6.8
	0.887555	0.491621			13.4	0.1
	0.887474	0.481955			0.5	14.3
	0.880456	0.4791			0.6	0.1
	0.88019	0.476046			1.5	11.1
	0.879948	0.470791			2.8	1.6
	0.875734	0.467213			0.4	1.6
	0.873419	0.465539			0.1	0.3
	0.868645	0.462305			1.8	0.5
	0.864225	0.459025			0.1	0.1
	0.861959	0.455483			0.6	0.1
	0.854459	0.454444			0.5	0.8
	0.853328	0.441611			3.5	2.6
	0.846734	0.440078			10.2	3
	0.843939	0.438835			0.6	4.3
	0.837166	0.437208			0.1	10.2
	0.835845	0.434327			58.8	1.7
	0.833514	0.432767			1.4	3.9
	0.829439	0.417587			0.8	8
	0.829031	0.415593			1.8	2.5
	0.824055	0.413593			1.2	2
	0.821856	0.412525			0.8	3
	0.818426	0.403785			0.1	1.5
	0.813281	0.402221			0.3	2.7
	0.81195	0.401887			1.7	0.7
	0.811143	0.397271			1.2	0.1
	0.809942	0.396988			0.6	0.3
	0.807867	0.386067			0.3	0.1
	0.804377	0.383231			0.9	0.2
	0.80104	0.38312			0.7	10.6
	0.800986	0.382442			0.5	0.9
	0.794811	0.375571			1.1	0.5
	0.793365	0.37385			8.1	0.6
	0.787026	0.370349			0.5	0
	0.785744	0.368682			0.9	0.8
	0.783865	0.367881			4.1	1.3
	0.780836	0.366869			0.1	1.7
	0.780257	0.356405			0.4	1.7
	0.778513	0.353423			1.3	2
	0.777117	0.349253			2.1	33.3
	0.772204	0.34757			0.4	7.7
	0.771477	0.342687			1.1	1.3
	0.769637	0.339969			0.3	0.9
	0.769221	0.333634			0.3	0.5
	0.768264	0.332451			0.5	1.5
	0.768249	0.329555			1.6	0.9
	0.76409	0.32922			1.9	0.4
	0.763604	0.328747			0.2	0.7
	0.762355	0.322729			0.7	60.8
	0.759952	0.319482			1.4	20.8
	0.759234	0.316911			5	3.7
	0.758942	0.316732			1.9	0.7
	0.757667	0.312794			0.7	0.8
	0.75587	0.311991			1	2.5
	0.753616	0.307756			2.4	0.2
	0.753077	0.306022			0.5	0.6
	0.750128	0.303463			1.7	0.9
	0.748558	0.302697			0.4	1
	0.74599	0.301465			0.6	0.2
	0.743405	0.297527			1.7	0.1
	0.743048	0.293873			0.7	1.4
	0.741137	0.293218			0.6	0.3
	0.740211	0.292428			0.3	42.5
	0.739945	0.29154			0.1	0.7
	0.739055	0.291491			1.3	0.2
	0.738624	0.290034			0.2	0.1
	0.737363	0.289934			0.3	0.2
	0.737128	0.28897			0.3	0.3
	0.736865	0.287815			0.9	0.1
	0.731799	0.287749			0.6	0.1
	0.731648	0.283077			0.2	0.1
	0.728603	0.282017			1.5	0.1
	0.72858	0.281076			22.1	1.4
	0.727392	0.280656			3.1	2.3
	0.726734	0.280504			0.1	0.4
	0.726472	0.280202			0.1	22.8
	0.725303	0.278517			0.3	1.2
	0.720691	0.278398			0.6	0.1
	0.720341	0.277255			0.4	0.6
	0.720097	0.276846			0.5	0.1
	0.720067	0.274376			0.2	18.9
	0.718894	0.273105			0.4	2.4
	0.717003	0.272635			0.6	1.6
	0.711636	0.270966			0.1	0.2
	0.711582	0.269329			0.3	0.5
	0.7106	0.269007			0	0.1
	0.706325	0.26754			0.1	0.2
	0.704178	0.265794			0.1	0.1
	0.703652	0.264237			0.4	0.3
	0.702266	0.263055			8.5	0.3
	0.701049	0.262986			3	0.1
	0.698602	0.262141			0.5	0.3
	0.698153	0.261427			0.2	0.1
	0.695572	0.261413			0.9	1.6
	0.693825	0.258503			0.1	0.8
	0.693254	0.257987			0.2	0.4
	0.692581	0.25778			0.3	2
	0.690999	0.257316			2.4	1.8
	0.686647	0.25684			0.4	0.4
	0.685824	0.256612			0.2	0.6
	0.685199	0.25602			1.7	0.2
	0.682202	0.255857			0.3	0.9
	0.681446	0.254441			0.6	1.7
	0.680074	0.25442			2	0.5
	0.679457	0.254209			0.1	12.6
	0.677272	0.253974			0.2	0.3
	0.671965	0.253524			1	2.9
	0.670426	0.253198			0.3	0.9
	0.669633	0.2517			1.5	0.1
	0.66842	0.251554			0.1	0.2
	0.667553	0.248971			0.1	1.7
	0.664033	0.247611			0.4	0.7
	0.660579	0.246531			0.6	0.8
	0.660099	0.245911			1.1	1
	0.659799	0.245155			0.1	9.8
	0.658484	0.245149			1.3	1.4
	0.658193	0.244057			0.9	1.4
	0.655578	0.243688			0.2	0.5
	0.654484	0.24368			1.1	56.4
	0.653735	0.24365			0.2	1.4
	0.650879	0.243408			3.6	1
	0.650452	0.243319			0.2	2.8
	0.64653	0.243181			0.1	0.1
	0.64632	0.24106			0.1	0.5
	0.645264	0.240415			0.5	0.1
	0.643053	0.24006			3.3	0.7
	0.64159	0.23989			0.2	14.4
	0.641216	0.239579			0.6	0.2
	0.640231	0.239423			0.1	0.5
	0.638219	0.238432			1.8	6.1
	0.637729	0.238082			0.1	3.3
	0.63764	0.237559			0.2	0.4
	0.637405	0.237504			15.5	0.6
	0.637054	0.23746			0.2	0.5
	0.635699	0.236705			1.3	1.8
	0.634424	0.236508			0.1	20.4
	0.631573	0.236468			0.9	1.9
	0.631426	0.234455			0.7	0.3
	0.631014	0.232021			1	1.1
	0.63045	0.231638			1.1	0.1
	0.629525	0.230952			2.9	0.1
	0.628827	0.230364			0.2	0.2
	0.627738	0.230061			1.5	2.9
	0.626161	0.229332			0.3	0.3
	0.625457	0.228822			0.3	0.1
	0.625282	0.227484			0.2	0.4
	0.624277	0.227066			3.1	0.9
	0.624033	0.226523			1.9	0.2
	0.623439	0.225739			0.1	1
	0.623372	0.225356			0.3	0.1
	0.6191	0.224913			0.4	0.8
	0.617745	0.22416			3.8	0.5
	0.617257	0.222534			0.5	2.3
	0.615236	0.221543			1.5	0.2
	0.614998	0.221224			1.5	2.9
	0.612698	0.219812			2.5	2.8
	0.609308	0.21801			1.5	2.5
	0.602956	0.217188			2.1	8.9
	0.602177	0.216976			0.2	4.2
	0.600937	0.216955			0.5	0.2
	0.600804	0.216312			0.2	0.4
	0.600087	0.215697			0.5	0.4
	0.599632	0.215458			0.2	0.7
	0.597232	0.214727			0.1	0.2
	0.59136	0.214611			1.2	0.1
	0.586905	0.213952			2.1	0.9
	0.585825	0.210755			35.8	0.1
	0.581992	0.210445			1.1	0.5
	0.581901	0.209901			0.1	1.1
	0.581078	0.209893			47.2	1.1
	0.580436	0.209686			2	0.5
	0.580167	0.209632			37.7	1.1
	0.579753	0.208246			1.8	0.7
	0.579422	0.208138			8.2	0.3
	0.578783	0.207934			0.1	0.6
	0.577166	0.207577			0.5	0.2
	0.57583	0.207387			0.2	1
	0.57306	0.20714			1	0.6
	0.571586	0.20686			0.2	1.6
	0.570607	0.206452			0.6	0.4
	0.570572	0.206272			0.7	0.2
	0.570247	0.204948			2	0.5
	0.569146	0.204744			0.4	0.1
	0.568379	0.204672			0.4	1.5
	0.566698	0.204586			1.3	3.1
	0.564606	0.204246			46.4	2.6
	0.564595	0.203699			1.3	0.1
	0.564168	0.203487			0.2	0.1
	0.561628	0.203297			3.3	0.3
	0.561033	0.20207			0.1	0.9
	0.559286	0.202068			0.9	0.2
	0.558543	0.201988			0.1	3.5
	0.558351	0.201558			9.8	0.2
	0.557444	0.20069			0.4	0.3
	0.557162	0.200295			0.1	1
	0.556402	0.199653			0.2	0.1
	0.553861	0.199332			6.5	2.7
	0.553194	0.198828			0.3	0.2
	0.553083	0.19872			0.1	0.1
	0.552709	0.198664			0.2	0.8
	0.552603	0.197009			0.4	1.1
	0.551872	0.196148			0.2	9.8
	0.551289	0.195873			24.2	3.1
	0.549598	0.19582			8.3	0.1
	0.548181	0.195027			1.5	10.4
	0.548071	0.19462			0.2	5
	0.54389	0.194434			1.7	0.2
	0.541723	0.19436			25.2	0.3
	0.541133	0.194173			0.6	0.2
	0.540308	0.194054			0.2	0.2
	0.539166	0.193812			1	0.6
	0.539096	0.193457			0.2	3.6
	0.538995	0.19216			1.3	1.1
	0.537797	0.191528			0.2	0.1
	0.537144	0.190441			1.7	0.3
	0.536687	0.19021			0.1	0.6
	0.534797	0.189871			0.1	0.2
	0.534373	0.189825			0.1	0.5
	0.533805	0.188337			1	0.4
	0.533669	0.187241			1.1	0.9
	0.532884	0.186903			0.1	0.2
	0.532748	0.18681			0.2	0.3
	0.532275	0.186769			0.4	0.1
	0.531646	0.186542			1.4	0.5
	0.531408	0.186498			5.8	1.6
	0.530459	0.186235			1.1	0.5
	0.529485	0.185958			2	0.2
	0.529369	0.185534			0.9	1.5
	0.52908	0.185172			0.4	0.6
	0.528717	0.185147			0.5	0.8
	0.527901	0.18444			0.6	1.9
	0.527282	0.183752			1	12.9
	0.525222	0.18327			0.2	2.6
	0.524362	0.183005			0.2	6.7
	0.524146	0.182412			0.8	0.8
	0.523027	0.182054			2.9	0.1
	0.521609	0.181881			0.1	1.5
	0.518887	0.181693			1.4	1.3
	0.518593	0.180739			0.8	0.1
	0.518403	0.18043			0.5	0.6
	0.514593	0.180376			0.9	0.3
	0.513047	0.180274			0.2	0.9
	0.512813	0.179709			0.5	0.5
	0.512298	0.178838			0.3	1
	0.51019	0.178672			1.7	0.1
	0.505261	0.178518			0.1	2.2
	0.504547	0.17774			0.1	15.2
	0.503525	0.177304			0.2	0.4
	0.502544	0.17699			0.2	1.6
	0.498179	0.176748			0.1	0.2
	0.497652	0.175313			13.1	0.5
	0.496131	0.175054			2.2	0.1
	0.495608	0.174878			0.3	0.7
	0.494925	0.17456			0.1	1.7
	0.494691	0.174044			0.8	91.5
	0.493376	0.173782			0.6	1.2
	0.493133	0.173644			0.1	2.3
	0.492421	0.173301			0.4	1.3
	0.490847	0.173055			1	3.2
	0.490502	0.173053			2	0.5
	0.489908	0.172288			0.2	31
	0.487954	0.17225			0.4	4.3
	0.48778	0.171351			0.3	0.8
	0.486966	0.171163			0.4	0.4
	0.486328	0.171087			0.3	5.2
	0.485688	0.170796			1.1	1.3
	0.48209	0.170288			0.2	0.1
	0.47994	0.170265			0.1	0.2
	0.479844	0.168936			0.6	0.1
	0.479141	0.167876			0.4	0.6
	0.478952	0.167314			0.1	0.1
	0.476797	0.167166			0.1	6.8
	0.475732	0.16677			30.1	0.5
	0.475047	0.166463			9.8	2.2
	0.472786	0.165409			0.1	0.4
	0.470434	0.165195			2.8	0.1
	0.470062	0.165089			55.8	1.1
	0.469827	0.165088			0.4	0.7
	0.468986	0.165082			0.1	0.2
	0.465676	0.164869			0.5	4.2
	0.464944	0.16483			0.4	1
	0.462046	0.164483			0.8	14.5
	0.460552	0.163936			0.3	0.5
	0.459929	0.163923			0.4	35.5
	0.457485	0.163283			2.2	2.9
	0.45541	0.163214			1.3	0.3
	0.454217	0.162972			0.1	7.3
	0.453694	0.162745			0.2	0.3
	0.4536	0.162471			0.1	0.1
	0.446418	0.16241			1.9	3.6
	0.445063	0.162311			2.2	2.4
	0.443462	0.161795			0.1	0.5
	0.439469	0.161176			0.9	4.7
	0.437461	0.160871			0.5	1.3
	0.437169	0.160605			0.3	3.4
	0.436728	0.160569			0.1	1.3
	0.434828	0.160334			0.7	1.1
	0.43311	0.160078			0.7	0.7
	0.431452	0.159861			0.6	0.3
	0.428424	0.159796			1.2	0.5
	0.428382	0.158912			0.7	0.2
	0.427842	0.158357			2.2	1.1
	0.426999	0.158197			2.5	16.3
	0.426293	0.15763			0.7	0.3
	0.421353	0.157198			0.6	0.2
	0.41496	0.157091			0.4	0.1
	0.414159	0.156893			0.1	0.1
	0.413496	0.15634			0.4	0
	0.413453	0.156223			4.1	0.1
	0.409116	0.156007			0.8	11.9
	0.407954	0.155765			1	2.3
	0.405975	0.155711			2.1	32.4
	0.405355	0.155438			0.3	0.5
	0.404973	0.155138			2.6	0.2
	0.404329	0.154017			7.7	0.1
	0.404187	0.153373			3.3	0.2
	0.402687	0.153195			1.1	4.2
	0.402632	0.152774			0.2	0.1
	0.401125	0.152165			0.2	0.2
	0.398569	0.151962			0.7	0.1
	0.398564	0.151727			0.4	0.5
	0.398401	0.151479			0.5	4.5
	0.397764	0.151414			2.6	2.2
	0.397666	0.151349			1	2.3
	0.397562	0.151192			0.2	0.2
	0.396404	0.151021			0.2	0.8
	0.394551	0.15088			0.4	0.1
	0.393807	0.15072			0.2	0.5
	0.393218	0.150671			0.9	2.1
	0.392394	0.150147			0.6	0.2
	0.392326	0.149118			2	0.4
	0.390715	0.147761			0.3	0.3
	0.389473	0.147619			0.7	0.6
	0.389059	0.146975			0.1	1.3
	0.388423	0.146404			0.3	0.9
	0.388181	0.146314			0.1	0.1
	0.3827	0.145908			0.5	0.7
	0.380492	0.145546			0.2	0.2
	0.378576	0.145515			0.8	0.6
	0.376595	0.145447			0.1	0.3
	0.37293	0.14507			0.2	0.5
	0.372474	0.144376			0.3	0.2
	0.370092	0.144288			1	0.8
	0.369217	0.143759			0.2	1.9
	0.368404	0.143362			0.2	0.9
	0.364335	0.143276			0.3	0.1
	0.364262	0.143128			0.3	0.2
	0.363374	0.142585			3.7	0.1
	0.362924	0.142413			5.5	0.5
	0.362435	0.142168			0.5	0.5
	0.361691	0.141917			0.1	0.2
	0.361536	0.141506			1.5	0.2
	0.361176	0.141023			0.8	0.3
	0.360082	0.140344			9.8	84.4
	0.357978	0.140305			0.3	0.9
	0.355671	0.140153			0.3	7.3
	0.35517	0.140068			1.1	1.3
	0.354831	0.139415			0.1	6.2
	0.352095	0.139295			0.2	1.9
	0.351466	0.139212			1	0.4
	0.351101	0.138956			0.9	1.1
	0.350998	0.138929			0.2	0.2
	0.350616	0.138615			0.2	0.4
	0.350022	0.138111			1.5	0.6
	0.348902	0.138049			9	0.4
	0.347981	0.13802			0	0.3
	0.346172	0.138007			0.1	0.9
	0.345734	0.138001			0.3	0.5
	0.345111	0.137478			5.5	0.2
	0.344041	0.137171			0.5	0.1
	0.338621	0.136885			0.5	0.2
	0.338099	0.136616			0.6	0.1
	0.337968	0.136505			0.2	6.7
	0.336634	0.136389			0.4	1.4
	0.336377	0.1357			1.1	1.5
	0.335209	0.135477			0.2	8.6
	0.332236	0.134562			0.7	5
	0.331704	0.134489			3.7	0.7
	0.330747	0.133745			0.9	0.9
	0.330461	0.133201			0.1	0.4
	0.33018	0.132751			0.3	3.8
	0.329445	0.132717			2.3	3.7
	0.328739	0.13255			0.3	5
	0.327988	0.132453			1.3	4
	0.32793	0.13237			0.4	1
	0.324713	0.132345			0.3	0.3
	0.323116	0.132305			1.4	3
	0.320607	0.131753			0.9	2
	0.32039	0.13166			2.2	2.7
	0.320207	0.131568			0.1	1.9
	0.320024	0.130968			0.9	0.4
	0.319507	0.130561			1.8	0.7
	0.319429	0.130559			0.4	1.3
	0.318838	0.130283			0.1	0.2
	0.318822	0.129925			0.9	0.8
	0.314427	0.129863			1	1.7
	0.313832	0.128512			1.3	0.1
	0.312785	0.128227			0.8	15.3
	0.312205	0.127477			0.5	1.9
	0.310218	0.12733			0.7	1.6
	0.309432	0.127143			0.1	0.1
	0.308165	0.125999			0.3	0.3
	0.306408	0.125784			3.3	1.3
	0.305512	0.125238			2	1.8
	0.304992	0.125041			0.1	4
	0.304012	0.124946			3.2	1.4
	0.30331	0.124649			7.9	0.5
	0.301429	0.124487			0.2	0.8
	0.300877	0.124239			0.2	0.3
	0.300692	0.12409			0.4	0.2
	0.299046	0.123794			0.8	3.4
	0.297453	0.123638			0.3	1.8
	0.296012	0.123614			0.1	2.3
	0.295975	0.123412			0.4	1.7
	0.294598	0.123347			0.1	4.5
	0.29386	0.123322			0.1	0.6
	0.29372	0.123123			0.9	1.1
	0.29369	0.123045			0.8	1.8
	0.293415	0.122851			4.7	0.2
	0.293154	0.122823			0.2	0.6
	0.292954	0.122705			1.8	0.4
	0.292738	0.121663			0.3	0.9
	0.291207	0.121605			25.5	113.2
	0.290691	0.12152			5.7	32.9
	0.290431	0.120829			8.9	0.3
	0.287501	0.120765			0.6	5.3
	0.285758	0.120428			3.3	3.2
	0.285303	0.119723			0.3	6.7
	0.284752	0.11945			1.4	1.6
	0.284279	0.11936			0.1	4.1
	0.282823	0.119355			2.7	2.3
	0.282698	0.119296			0.6	1.4
	0.281751	0.119225			0.2	0
	0.280685	0.118912			0.7	0.1
	0.280064	0.118575			12.1	0.2
	0.279658	0.118371			1.3	0.1
	0.279008	0.118242			1.6	0.1
	0.278691	0.118188			11.3	3.2
	0.277891	0.117576			0.6	0.2
	0.276746	0.116913			3.4	1.7
	0.275638	0.116515			2.6	0.2
	0.275539	0.116421			4.5	1.1
	0.274958	0.115753			0.6	0.4
	0.274789	0.115722			1.5	0.1
	0.274391	0.115679			2.2	1.7
	0.272502	0.115246			0.4	0.5
	0.268786	0.115017			4.6	0.5
	0.268578	0.114925			1.8	1
	0.26838	0.114654			0.1	1.6
	0.268282	0.114087			0.6	1.1
	0.26827	0.113963			2.2	0.9
	0.268166	0.11383			0.2	0.8
	0.266986	0.113687			0.3	0.1
	0.266072	0.112907			2.7	0.1
	0.264058	0.112494			3.6	0.2
	0.263871	0.112486			0.3	0.3
	0.262157	0.112065			1.6	0.2
	0.261345	0.111838			1.1	12.6
	0.260356	0.111589			1.1	7.8
	0.257818	0.111558			0.9	5.1
	0.257568	0.111445			0.1	4.8
	0.257536	0.111409			3.7	0.9
	0.257308	0.111301			0.6	1
	0.257218	0.110835				13
	0.256588	0.110681				6
	0.255976	0.110545				2.7
	0.255902	0.110529				2.2
	0.253305	0.110383				0.3
	0.252652	0.110131				11.9
	0.252085	0.109787				1.4
	0.251711	0.109779				0.3
	0.251218	0.109622				2.8
	0.251074	0.109432				0.2
	0.250469	0.109032				2
	0.250128	0.10902				0.3
	0.249463	0.108894				0.9
	0.249328	0.108681				0.1
	0.248615	0.108123				0.5
	0.248329	0.107892				0.8
	0.247033	0.107752				0.1
	0.246968	0.107512				2.2
	0.246171	0.107341				0.2
	0.246027	0.107065				0.3
	0.245637	0.106899				0.1
	0.245545	0.106787				0.6
	0.245327	0.106561				0.1
	0.24495	0.10612				33.1
	0.243651	0.106095				1.1
	0.243018	0.105895				1.5
	0.242217	0.105844				0.6
	0.241215	0.105842				0.1
	0.240535	0.105804				0.1
	0.238264	0.105671				0.1
	0.237051	0.105317				3.5
	0.236947	0.105204				2.3
	0.236603	0.105008				22
	0.236433	0.104819				1.2
	0.236059	0.104109				5
	0.235558	0.10392				1.6
	0.235457	0.103173				0.2
	0.234337	0.10313				0.5
	0.234321	0.102326				1.9
	0.234045	0.10194				0.3
	0.233382	0.101857				17.7
	0.233297	0.101751				84.8
	0.2332	0.101621				2.3
	0.232498	0.101491				0.3
	0.232451	0.10127				2.8
	0.232447	0.10115				1.8
	0.232194	0.101108				0.6
	0.230598	0.101053				0.3
	0.229975	0.100865				0.1
	0.22854	0.100651				5.5
	0.228512	0.10012				0.6
	0.228491	0.0996608				1.1
	0.228136	0.0996056				0.2
	0.227915	0.0991866				2
	0.226937	0.0989553				1.9
	0.226397	0.0989234				3.8
	0.225793	0.0988533				2.4
	0.22552	0.0984628				0.8
	0.224376	0.0982733				2.6
	0.223326	0.0980243				1.4
	0.223132	0.0979803				0.3
	0.222868	0.0978418				0.7
	0.222623	0.0978261				1.2
	0.221528	0.0976719				0.2
	0.220948	0.0976442				0.4
	0.220825	0.0975594				0.2
	0.220448	0.0971031				0.1
	0.220335	0.0968418				1.3
	0.220181	0.0964901				0.6
	0.219949	0.0963273				0.1
	0.219444	0.0958711				0.1
	0.218945	0.0957818				0.1
	0.21729	0.0957246				0.2
	0.217191	0.0956373				0.3
	0.217077	0.0955676				0.4
	0.215984	0.0955259				0.3
	0.215003	0.0954139				0.2
	0.213847	0.094894				2.3
	0.213653	0.0947921				1.2
	0.212504	0.0946944				0.3
	0.211831	0.094237				0.4
	0.211732	0.0940421				0.3
	0.210965	0.0937871				0.1
	0.210317	0.0936428				0.1
	0.210288	0.0928573				20.8
	0.210197	0.092684				0.5
	0.208052	0.0925887				0.6
	0.207683	0.0924532				0.1
	0.207269	0.0919426				0.1
	0.206476	0.0918676				1.2
	0.205888	0.0917696				5.4
	0.204906	0.0913367				18.5
	0.204705	0.0907015				22.4
	0.204528	0.0906599				0.2
	0.204438	0.0904824				0.2
	0.204396	0.0903583				0.3
	0.204242	0.090226				0.1
	0.204204	0.0902145				0.4
	0.204111	0.0899854				0.1
	0.204098	0.0898144				0.6
	0.203626	0.0897674				0.1
	0.203355	0.0896567				9.6
	0.20318	0.089556				43.5
	0.202207	0.0891299				0.7
	0.202005	0.088977				51.4
	0.201879	0.0888502				0.2
	0.201216	0.0885853				1
	0.20111	0.0884309				0.2
	0.20092	0.0880571				1.2
	0.199805	0.0872093				0.8
	0.199348	0.0871725				1.4
	0.198776	0.0871004				2.9
	0.198729	0.0868315				1
	0.198702	0.0868308				12.4
	0.198312	0.0866184				8.9
	0.198131	0.086576				0.9
	0.198056	0.0862665				1.7
	0.197777	0.0862297				1.7
	0.197014	0.0859065				0.2
	0.196246	0.0857936				0.4
	0.195538	0.0857469				0.8
	0.195466	0.0855954				0.5
	0.19487	0.0854315				47.2
	0.194257	0.0851062				1.3
	0.194205	0.0850889				0.1
	0.193523	0.0849783				2
	0.193274	0.0847864				1.7
	0.192598	0.0847099				1.3
	0.192572	0.0845303				5.5
	0.192272	0.084515				8.9
	0.191703	0.0844709				0.2
	0.191151	0.0837684				0.1
	0.190883	0.0836673				2.6
	0.190829	0.0836563				0.1
	0.190458	0.0836346				0.4
	0.190037	0.0833589				0.7
	0.189677	0.0831598				7.4
	0.189437	0.0831385				32.3
	0.189154	0.0829827				1.1
	0.18908	0.0827939				0.8
	0.187971	0.0824851				0.1
	0.187794	0.0824583				0.9
	0.187171	0.0824076				0.3
	0.186807	0.0823934				0.3
	0.185421	0.0821061				0.2
	0.185297	0.0820232				0
	0.184036	0.0818735				1.1
	0.183927	0.0817121				0.1
	0.183146	0.0816833				0.1
	0.181974	0.080715				0.5
	0.180902	0.0803336				0.2
	0.180773	0.0802966				0.4
	0.180151	0.0796535				0.2
	0.18015	0.0794275				0.3
	0.179934	0.0792227				0.3
	0.179468	0.0787031				0.2
	0.179459	0.0785334				0.1
	0.179091	0.0784267				0.6
	0.17844	0.0781469				0.5
	0.178397	0.0780945				0.1
	0.177887	0.077714				0.1
	0.177703	0.07735				4.3
	0.177574	0.0773369				0.1
	0.177509	0.0771418				5.4
	0.176954	0.0767404				3
	0.176953	0.0767064				0.1
	0.175876	0.0765331				2.7
	0.175765	0.0763425				0.4
	0.175026	0.0761219				0.3
	0.174812	0.0758912				4.7
	0.174268	0.0755495				21.7
	0.17323	0.0755389				16.1
	0.173022	0.0753599				16.6
	0.172875	0.0752631				19.1
	0.172398	0.0752562				1.9
	0.171896	0.0752458				0.1
	0.17145	0.0747503				3.5
	0.171363	0.0743372				0.1
	0.171256	0.0742313				20.2
	0.170337	0.0740943				2.2
	0.169179	0.0740021				47.5
	0.168431	0.0738692				2.1
	0.167668	0.0737788				0.3
	0.167667	0.0737081				1
	0.167171	0.0734105				0.1
	0.166982	0.0734037				0.1
	0.165956	0.0733813				2.6
	0.165944	0.0732913				0.6
	0.165915	0.0732848				0.4
	0.16571	0.0732433				0.4
	0.165481	0.0731338				0.5
	0.165027	0.0726155				0.2
	0.164931	0.0725759				0.9
	0.164901	0.072488				0.2
	0.164733	0.0724597				0.4
	0.164179	0.0723753				0.8
	0.163506	0.0723012				0.3
	0.163457	0.0718682				0.1
	0.163438	0.0715154				0.7
	0.163	0.0712027				0.3
	0.162049	0.0710733				0.2
	0.161056	0.070935				0.1
	0.160815	0.0707582				0.2
	0.160575	0.0704961				0.1
	0.160566	0.0702364				3.6
	0.160293	0.0702209				1.4
	0.159878	0.0699888				0.9
	0.159488	0.0699387				0.1
	0.158173	0.06986				0.1
	0.15766	0.069602				0.5
	0.157517	0.0693159				0.2
	0.157269	0.0683397				0.5
	0.156949	0.068302				0.6
	0.156803	0.0679197				0.2
	0.156601	0.0678264				0.2
	0.156201	0.0675342				0.3
	0.156072	0.0672633				0.1
	0.155378	0.067227				0.4
	0.154882	0.0672158				0.2
	0.154462	0.0670035				0.2
	0.154075	0.0669356				84.1
	0.153924	0.0667069				33.4
	0.153883	0.0666137				22.3
	0.153831	0.0662568				9.6
	0.153617	0.0657731				6.6
	0.15193	0.0656667				1.3
	0.151726	0.0656021				0.6
	0.1514	0.0655771				1.2
	0.151345	0.065353				0.1
	0.15089	0.0651861				1.7
	0.150752	0.0650637				0.5
	0.149239	0.0650033				0.1
	0.149054	0.0646069				1.1
	0.148732	0.0645428				17
	0.148697	0.0645267				0.5
	0.148194	0.0644533				1.4
	0.148161	0.064448				8.8
	0.148053	0.0644382				1.5
	0.146972	0.0643579				0.5
	0.146969	0.0643497				3.2
	0.146902	0.0641421				0.2
	0.146834	0.0635206				0.2
	0.146449	0.0633151				0.2
	0.145703	0.0633038				0.2
	0.145657	0.063192				0.5
	0.145619	0.0630143				0.6
	0.145297	0.0629645				0.1
	0.145074	0.0629239				0.4
	0.144524	0.062825				0.2
	0.144258	0.0627387				0.2
	0.143547	0.0626548				0.1
	0.142475	0.0626212				0.1
	0.141836	0.062349				5.4
	0.141303	0.0620767				0.1
	0.141184	0.0619176				1.4
	0.141048	0.061692				0.4
	0.140876	0.0616519				0.5
	0.140559	0.0616047				0.7
	0.139899	0.0614963				0.8
	0.139759	0.0611715				0.1
	0.139629	0.0611519				0.2
	0.13957	0.0611449				0.1
	0.139246	0.0609898				0
	0.139082	0.0609175				1.2
	0.13826	0.0606295				26.6
	0.138244	0.0605645				0.7
	0.1377	0.0605047				1.8
	0.137358	0.0603931				2.9
	0.137197	0.060257				0.3
	0.13674	0.0601504				0.2
	0.13627	0.0600994				1.6
	0.136126	0.0600451				0.4
	0.135998	0.0599724				0.4
	0.135614	0.0599604				4.1
	0.135521	0.0599132				0.1
	0.135509	0.0598395				0.4
	0.134879	0.0597918				0.2
	0.133765	0.0596426				0.2
	0.133568	0.0592411				0.1
	0.133273	0.059179				0.3
	0.132783	0.0591466				0.6
	0.13276	0.0591323				0.3
	0.132697	0.0591208				0.2
	0.131821	0.0591087				11.3
	0.131655	0.0590158				0.8
	0.131602	0.058985				0.1
	0.131561	0.0587902				0.7
	0.131306	0.0583257				0.1
	0.131111	0.0582941				0.2
	0.130949	0.0582655				17.8
	0.130826	0.0579911				0.1
	0.130767	0.0577686				0.3
	0.130505	0.0575098				0.4
	0.130163	0.0573881				2.8
	0.129924	0.0571239				1.2
	0.129585	0.0570146				12.4
	0.128667	0.0565552				0.5
	0.128195	0.056496				0.2
	0.128089	0.0562824				1.4
	0.127968	0.0561829				0.4
	0.127698	0.0559696				18.5
	0.127145	0.0559531				2.4
	0.127062	0.055795				0.1
	0.126905	0.0555813				0.6
	0.126903	0.0553872				0.1
	0.126608	0.0553758				0.6
	0.12629	0.0548552				0.1
	0.126279	0.054677				0.7
	0.125969	0.0545762				0.1
	0.125708	0.05456				1.3
	0.125396	0.0544289				0.2
	0.12516	0.0543993				0.8
	0.124996	0.0543934				0.9
	0.124855	0.053612				0.5
	0.124519	0.0534034				3.6
	0.124286	0.0528838				1.7
	0.124089	0.0528366				4.3
	0.123707	0.0527683				0.6
	0.123591	0.052684				2.5
	0.123473	0.0522144				2.5
	0.123357	0.0522089				0.5
	0.123351	0.052114				0.1
	0.1232	0.0521081				0.4
	0.123128	0.0519306				0.5
	0.123026	0.0518258				25
	0.122573	0.0511892				10.9
	0.122373	0.0511357				1.2
	0.122283	0.0511172				0.2
	0.122065	0.051063				1.6
	0.121545	0.0507294				0.1
	0.12134	0.0505719				0.2
	0.120012	0.0504206				16.2
	0.119992	0.0503148				7.3
	0.119774	0.050061				2.2
	0.119192	0.0500234				0.1
	0.118811	0.0499377				0.1
	0.118188	0.0499084				0.2
	0.117874	0.0498245				0.1
	0.117644	0.0494577				0.2
	0.117482	0.0493619				4
	0.117265	0.0490027				1.7
	0.116245	0.0489884				0.3
	0.115967	0.048983				0.1
	0.1156	0.0489737				0.2
	0.115539	0.048879				0.2
	0.115489	0.0488368				0.1
	0.115238	0.0487656				0.4
	0.114857	0.048711				0.5
	0.114804	0.0486643				0.6
	0.114788	0.0485752				0.2
	0.114722	0.0483228				0.3
	0.11459	0.0483092				0.4
	0.114444	0.0481604				0.1
	0.114171	0.0480079				0.1
	0.113585	0.0478479				10.7
	0.113526	0.0475649				9.3
	0.113493	0.0472881				65.2
	0.11344	0.0472673				0.9
	0.11338	0.0472571				6.2
	0.113292	0.0472516				0.7
	0.113187	0.04717				0.7
	0.112933	0.0469172				0.2
	0.112925	0.0466367				0.3
	0.112794	0.0465479				46.4
	0.112307	0.0464622				0.7
	0.111976	0.0462456				0.8
	0.111251	0.0461997				1
	0.111062	0.0461361				0.7
	0.110995	0.0460771				0.1
	0.110265	0.0458966				13.9
	0.10997	0.0458913				0.2
	0.109824	0.0458473				0.2
	0.10962	0.0458109				0.1
	0.10926	0.0455763				0.1
	0.109225	0.0454797				0.1
	0.108815	0.0452865				0.5
	0.108721	0.0452515				1.4
	0.107893	0.0452512				0.8
	0.107675	0.0451789				0.2
	0.107648	0.0451503				1.4
	0.106855	0.0450177				1
	0.106718	0.0449942				0.5
	0.106392	0.0448395				0.5
	0.106334	0.0446923				0.5
	0.105955	0.0446806				0.6
	0.105927	0.0445449				0.1
	0.105809	0.0444768				1.9
	0.105709	0.0444208				0.3
	0.105692	0.0443029				0.8
	0.105527	0.0440441				29.6
	0.105382	0.0439737				1.2
	0.105121	0.0439378				0.1
	0.104932	0.0438421				2.2
	0.104624	0.0437438				0.3
	0.104055	0.043653				2.8
	0.103733	0.0435721				0.9
	0.103625	0.0435059				0.9
	0.10361	0.0432926				2.8
	0.102794	0.0432165				0.6
	0.10275	0.0430749				1.1
	0.102371	0.0430669				0.4
	0.101556	0.0430628				0.2
	0.101441	0.042937				1.2
	0.10132	0.0427719				1.8
	0.101229	0.0427578				0.4
	0.100647	0.0426742				0.7
	0.100322	0.042608				9.4
	0.100143	0.042523				0.6
	0.0991541	0.042468				1.2
	0.0988962	0.0424016				1.7
	0.0988645	0.0423072				0.2
	0.0986874	0.0422347				0.5
	0.0985533	0.0420471				0.1
	0.0985227	0.041905				5
	0.0985121	0.0418782				1.1
	0.098062	0.0418626				27
	0.0978276	0.0417102				9.7
	0.097142	0.0414173				2.9
	0.0965176	0.041386				6.4
	0.0960705	0.0412551				2.8
	0.0958078	0.0412306				5.3
	0.0955317	0.0410728				1.3
	0.0954365	0.0410679				1.1
	0.095422	0.0409586				0.8
	0.0951151	0.0407907				0.9
	0.0951028	0.0406846				0.1
	0.0948368	0.0403389				0.4
	0.0940837	0.040314				0.4
	0.0935136	0.0402892				0.3
	0.0930593	0.0402172				2
	0.0925549	0.0401416				1.6
	0.0916518	0.0400827				1
	0.091356	0.0400591				2.6
	0.0909628	0.0399044				0.1
	0.0904731	0.0397031				0.2
	0.0903206	0.039666				0.5
	0.0902801	0.0394562				1.9
	0.0902408	0.0393586				0.8
	0.090225	0.0393568				0.7
	0.0899928	0.0392283				1.2
	0.0898095	0.0390066				3
	0.0897751	0.0389734				2.1
	0.0896954	0.0388635				1.8
	0.0894691	0.038774				1.1
	0.0881022	0.038614				1.9
	0.0880142	0.0385438				12.6
	0.0877587	0.0384479				0.9
	0.0875891	0.038382				0.6
	0.087372	0.0381698				1.1
	0.0872301	0.0369557				4.4
	0.0870327	0.0368278				3.6
	0.0869023	0.0365484				3
	0.086766	0.036333				2.4
	0.0866966	0.0362288				0.7
	0.0865162	0.0360232				4.7
	0.0861829	0.0359974				5.2
	0.0859951	0.0359729				1
	0.0851919	0.0357651				1.5
	0.0849294	0.0357311				1
	0.0840193	0.0357004				0.8
	0.0839734	0.0355491				1.6
	0.0839387	0.0354694				7.3
	0.0837752	0.0354151				1.8
	0.0836164	0.0352881				3.5
	0.0835701	0.035239				0.3
	0.0832963	0.0351437				0.1
	0.0832661	0.0345108				0.8
	0.0832177	0.0343355				3.9
	0.0830104	0.0340244				0.7
	0.0828976	0.0338684				1.6
	0.0826589	0.0338203				0.4
	0.0826162	0.0333181				0.5
	0.0825355	0.0329304				0.4
	0.0825355	0.0329029				2.1
	0.0817536	0.0328765				0.2
	0.0817318	0.0328492				0.9
	0.0814592	0.0327824				0.1
	0.0814534	0.032454				0.7
	0.0814206	0.032402				59
	0.0810482	0.0323652				1.2
	0.0803542	0.0323612				0.3
	0.0801711	0.0321695				0.3
	0.079554	0.0321658				0.1
	0.0794106	0.0320497				0.2
	0.0793965	0.0319968				0.2
	0.0792742	0.0319596				0.1
	0.0792291	0.0318208				0.5
	0.0789047	0.0315195				2
	0.078667	0.0314751				0.2
	0.0785769	0.0312576				0.6
	0.0784874	0.0309609				0.3
	0.0784686	0.0309523				0.4
	0.0780938	0.0308341				0.9
	0.0780514	0.0305474				0.4
	0.0779864	0.0301953				0.3
	0.0775774	0.0300195				0.3
	0.0770743	0.0298586				0.5
	0.0769492	0.0294991				0.5
	0.0765908	0.0293442				0.4
	0.0765493	0.029045				0.4
	0.0762102	0.0290211				0.6
	0.0760812	0.0290077				1.4
	0.0759416	0.02897				0.8
	0.0758566	0.0287393				0.4
	0.0757914	0.0283687				56.6
	0.0753702	0.0283598				0
	0.0753514	0.0283325				0.7
	0.0752218	0.0282701				0.5
	0.0751291	0.0282465				0.9
	0.0747415	0.0280416				0.2
	0.0746144	0.0280209				0.2
	0.0745783	0.027584				0.2
	0.0743494	0.0273688				0.3
	0.0738639	0.0272458				0.1
	0.0737431	0.0270062				0.4
	0.073589	0.0269856				0.3
	0.0734621	0.0269448				0.2
	0.0733848	0.0267695				0.9
	0.0730184	0.0264362				2.4
	0.0730074	0.0264044				0.9
	0.0729413	0.0263609				0.6
	0.0725904	0.0263591				1.3
	0.0724178	0.0261843				3.5
	0.0717165	0.0261032				1.7
	0.0713213	0.0260924				0.4
	0.0703905	0.0258217				0.1
	0.070204	0.0256635				139.4
	0.069972	0.0254388				1.8
	0.0695263	0.0254361				4.2
	0.0693252	0.0252841				4.3
	0.0690447	0.0250333				0.4
	0.069035	0.0250181				54.9
	0.0689835	0.0249262				0.9
	0.0687367	0.0247496				0.4
	0.068707	0.0246569				2.6
	0.0686313	0.0245925				0.1
	0.0675342	0.0245767				2.4
	0.0670952	0.0244801				0.7
	0.0668578	0.0240594				0.8
	0.0668529	0.023791				5.1
	0.0668352	0.0235272				0.5
	0.0664681	0.0229012				1.3
	0.0662524	0.0228017				1.3
	0.0659557	0.0227627				0.1
	0.0654785	0.0224485				0
	0.0651463	0.0224226				6.2
	0.0647764	0.0223723				1.3
	0.0644072	0.0223495				1.3
	0.0644063	0.0222688				0.8
	0.0641164	0.0216178				0.3
	0.0639469	0.0215297				1.4
	0.0638087	0.0215				0.2
	0.0633526	0.0214695				0.8
	0.0632249	0.021128				0.1
	0.0629121	0.0210431				0.1
	0.0625187	0.0208667				0.5
	0.0623785	0.0208365				0.5
	0.06236	0.0200664				0.6
	0.062207	0.0200457				0.8
	0.0617745	0.0199142				0.3
	0.0616618	0.0198831				0.6
	0.0615412	0.0197845				0.2
	0.0613764	0.0197787				1.2
	0.0609775	0.0197413				0.3
	0.0601776	0.0196538				0.2
	0.0601699	0.0193499				0.8
	0.0599976	0.0193316				0.5
	0.0593734	0.0192736				6
	0.0592901	0.0192624				0.8
	0.0591147	0.0192168				1.7
	0.0590211	0.0190808				0.7
	0.0589001	0.0190408				0.2
	0.0585476	0.0188047				0.3
	0.0584108	0.018739				0.4
	0.0583426	0.0187183				0.7
	0.0582035	0.0186597				1.5
	0.0575972	0.0186523				1
	0.0574746	0.0183157				0.4
	0.0574319	0.0181117				0.3
	0.056617	0.0178434				3.9
	0.0561967	0.0176674				0.4
	0.0560619	0.0176557				5.2
	0.0560403	0.017595				0.6
	0.056004	0.0175186				1.7
	0.0559649	0.0173664				0.1
	0.0558914	0.0172465				3.3
	0.0558877	0.0170147				0.2
	0.0558405	0.0170042				0.8
	0.0552999	0.0168756				0.7
	0.0551621	0.0165325				0.8
	0.0551575	0.016409				1.9
	0.0547959	0.0161581				0.3
	0.0542268	0.0158099				3.9
	0.0541128	0.0157447				0.2
	0.0539578	0.0154774				2.7
	0.053414	0.0153621				0.3
	0.0528797	0.0153496				0.2
	0.0526389	0.0149439				0.2
	0.0526075	0.0148863				0.2
	0.0523034	0.0148636				1.3
	0.052242	0.0147759				0.1
	0.0518724	0.0147064				0.9
	0.0517854	0.0146923				2
	0.051388	0.0146337				0.4
	0.051275	0.0145759				1
	0.0509557	0.0145615				0.1
	0.0506521	0.0145364				0.1
	0.0495389	0.0145216				0.3
	0.0494914	0.0145106				2.5
	0.049476	0.0144547				0.5
	0.0493134	0.0141193				0.6
	0.0492657	0.0140963				1.2
	0.049042	0.0140543				1
	0.0487055	0.0138891				14.9
	0.0484648	0.0138278				7.3
	0.048245	0.0136876				0.2
	0.0478258	0.0136655				4.3
	0.0473842	0.0136475				0.2
	0.0473708	0.0133463				2
	0.0470193	0.0132634				0.1
	0.046852	0.0132268				1.8
	0.0464107	0.01322				0.1
	0.046354	0.0131811				0.1
	0.0460027	0.0129904				0.2
	0.0459716	0.0126606				0.9
	0.0459019	0.0126455				1.5
	0.0459013	0.0122534				1.7
	0.0455239	0.0122532				0.3
	0.045491	0.0120053				0.1
	0.0454812	0.0118336				1.1
	0.0451956	0.0116739				0.9
	0.0450605	0.0116042				3.2
	0.0450096	0.0113887				1.9
	0.0442803	0.011266				0.3
	0.04409	0.0112444				0.2
	0.0437037	0.0109693				0.5
	0.0434001	0.010755				0.4
	0.0433893	0.0106914				0.1
	0.0432292	0.010676				1.1
	0.0431439	0.0104398				0.1
	0.0431137	0.0104086				2.2
	0.0430813	0.0103127				0.6
	0.04306	0.0098386				18.5
	0.0427436	0.0097499				0.8
	0.0426615	0.00969815				0.4
	0.0424947	0.00969422				4.7
	0.0421635	0.00956553				5.6
	0.0419876	0.00917748				5.3
	0.0410798	0.00913775				19
	0.0405943	0.00901724				0.8
	0.0405526	0.00886811				0.8
	0.0403349	0.00869213				7.2
	0.0399457	0.008666				0.3
	0.0398852	0.00837691				5.3
	0.0398781	0.00834261				0.7
	0.0392403	0.00789388				0.4
	0.0389638	0.00759608				0.7
	0.0385297	0.00750851				0.3
	0.038424	0.00721363				0.3
	0.0383085	0.00682708				0.2
	0.0376986	0.00650731				0.2
	0.0370697	0.00649021				0.7
	0.0370352	0.00630279				0.5
	0.036919	0.00615281				0.2
	0.0363221	0.00609849				0.1
	0.0359199	0.00608305				0.1
	0.0359072	0.00590587				0.6
	0.0355313	0.00585217
	0.03547	0.0058282
	0.0354139	0.00578179
	0.0352557	0.00561141
	0.035018	0.00535709
	0.0349612	0.00535655
	0.0346906	0.00534254
	0.0346262	0.00508798
	0.0341777	0.00482058
	0.0336466	0.00443048
	0.0332751	0.0042798
	0.0329103	0.00427878
	0.0324541	0.00422117
	0.0322898	0.00419069
	0.0322423	0.00414921
	0.0321959	0.00414079
	0.0317673	0.00410162
	0.0310339	0.00403807
	0.0305876	0.00402463
	0.0304964	0.00397668
	0.0304446	0.00392448
	0.0304367	0.00378407
	0.030104	0.00375053
	0.0296109	0.00360882
	0.0293636	0.00358585
	0.0290449	0.00345657
	0.0288037	0.00343329
	0.0284738	0.00332685
	0.028285	0.00331709
	0.0275852	0.00322093
	0.027223	0.00307435
	0.0269233	0.00284414
	0.0269058	0.00280459
	0.0268789	0.00261965
	0.0265763	0.00260362
	0.0265297	0.00218427
	0.0262272	0.00189887
	0.0258426	0.00186731
	0.0257851	0.0015779
	0.0257405	0.00126301
	0.0253732	0.00111347
	0.0251039	0.000899527
	0.0250712	0.000846071
	0.0246936	0.000728243
	0.0246571	0.000620674
	0.0246211	0.00057069
	0.0244551	0.000494951
	0.0244056	0.000449194
	0.0239089	0.000358152
	0.0239022	0.000142882
	0.0235172	0.000138329
	0.023492	0.000121466
	0.0234215	2.03e-05
	0.0232428	-7.08e-05
	0.0232213	-0.000243896
	0.0231398	-0.000505722
	0.0231391	-0.000674592
	0.0231029	-0.00077648
	0.0229538	-0.00104567
	0.022784	-0.00106743
	0.0224597	-0.00116917
	0.0219088	-0.00151058
	0.0218485	-0.00170838
	0.0218085	-0.00173655
	0.021767	-0.00176505
	0.0215282	-0.00220851
	0.0209695	-0.00258407
	0.0203455	-0.00278157
	0.0199576	-0.00292042
	0.0198579	-0.00295971
	0.019704	-0.00317427
	0.0196288	-0.00324142
	0.019475	-0.00334821
	0.0192438	-0.00343829
	0.0189847	-0.00356715
	0.0187127	-0.00361662
	0.0184983	-0.00395164
	0.0184064	-0.0040279
	0.0174729	-0.00404774
	0.0174506	-0.00417889
	0.0173975	-0.00427424
	0.0171615	-0.00428893
	0.0171131	-0.00428988
	0.0168037	-0.00449976
	0.0163288	-0.00460144
	0.0159652	-0.00492547
	0.0158989	-0.00521636
	0.0158528	-0.0053647
	0.0157559	-0.00561923
	0.0155766	-0.00562622
	0.0151263	-0.00596506
	0.0150335	-0.0062457
	0.0149561	-0.00644013
	0.014657	-0.00662153
	0.0144413	-0.00679257
	0.0144295	-0.00715556
	0.0140828	-0.00715682
	0.0139307	-0.00721754
	0.013246	-0.00726434
	0.0132427	-0.00761229
	0.0131248	-0.00770544
	0.0126866	-0.00773544
	0.0120663	-0.00776235
	0.0114743	-0.00791497
	0.0114545	-0.00800372
	0.0114286	-0.00809034
	0.0113696	-0.00813268
	0.0111535	-0.00814106
	0.010935	-0.00814742
	0.0103107	-0.00824521
	0.010304	-0.00874812
	0.0100826	-0.00879881
	0.0095249	-0.00889058
	0.00891685	-0.0091183
	0.0087749	-0.00920698
	0.00871746	-0.00927294
	0.00821012	-0.0092829
	0.00797863	-0.00932066
	0.0079087	-0.00936024
	0.00771931	-0.00967531
	0.00738358	-0.00976304
	0.00730105	-0.00983777
	0.0069914	-0.00987108
	0.00651879	-0.010115
	0.00576312	-0.0101318
	0.00564521	-0.0102404
	0.00540386	-0.0103121
	0.00522076	-0.0105782
	0.00509724	-0.0106591
	0.00458714	-0.0110505
	0.00432664	-0.0112753
	0.00387771	-0.0113218
	0.00356029	-0.0115568
	0.00315458	-0.0117211
	0.00296007	-0.0118136
	0.0020472	-0.0118601
	0.00203339	-0.0118653
	0.00193052	-0.0119608
	0.00136843	-0.0119734
	0.00109283	-0.0119846
	0.000922665	-0.0120231
	0.000633339	-0.012122
	0.000560257	-0.0123271
	0.000543193	-0.0125491
	7.21e-05	-0.0125562
	-0.000204885	-0.012559
	-0.000540419	-0.0126119
	-0.000558239	-0.0126725
	-0.000910728	-0.013339
	-0.00106488	-0.0136557
	-0.00162428	-0.0136717
	-0.00206773	-0.0139977
	-0.00231938	-0.0140384
	-0.0023963	-0.0142078
	-0.00268776	-0.0143642
	-0.00294276	-0.0144965
	-0.00301829	-0.014569
	-0.00340592	-0.01463
	-0.0043595	-0.0146578
	-0.0048381	-0.0146971
	-0.00505151	-0.0147372
	-0.00524173	-0.0148115
	-0.00526902	-0.0149051
	-0.00567291	-0.0149631
	-0.00586767	-0.0150231
	-0.00601747	-0.0151749
	-0.00645185	-0.0164058
	-0.00647175	-0.0165443
	-0.00648256	-0.016593
	-0.00658527	-0.0167787
	-0.00660535	-0.0167957
	-0.00711709	-0.016811
	-0.00752188	-0.0168365
	-0.00753815	-0.0169563
	-0.00780005	-0.0171065
	-0.00803293	-0.0171204
	-0.0088726	-0.0174946
	-0.00887345	-0.0174947
	-0.009082	-0.0175958
	-0.0098214	-0.0177026
	-0.0102593	-0.017808
	-0.0114803	-0.0178537
	-0.0116342	-0.0179927
	-0.0116845	-0.0181533
	-0.0117017	-0.0182598
	-0.0117609	-0.0184217
	-0.0121047	-0.0184244
	-0.0126918	-0.0184404
	-0.0132648	-0.0187805
	-0.0136702	-0.0188091
	-0.014077	-0.0188125
	-0.0141096	-0.0188666
	-0.0142162	-0.0188951
	-0.015008	-0.0189589
	-0.0151062	-0.0189998
	-0.0154033	-0.0190414
	-0.0156653	-0.0191027
	-0.0159476	-0.0192215
	-0.0164055	-0.0192495
	-0.0168518	-0.0193701
	-0.0172425	-0.0194925
	-0.0174247	-0.0200236
	-0.0183126	-0.0200391
	-0.018421	-0.0200702
	-0.0193925	-0.0200842
	-0.0197386	-0.020112
	-0.0197626	-0.0201266
	-0.019975	-0.0201716
	-0.0203623	-0.020218
	-0.0206974	-0.0202397
	-0.020852	-0.020365
	-0.0208946	-0.0205091
	-0.0214043	-0.0205255
	-0.0218965	-0.0206905
	-0.022369	-0.0209469
	-0.0228175	-0.0209782
	-0.0228883	-0.0210007
	-0.0229035	-0.0215789
	-0.0237552	-0.0215874
	-0.0238065	-0.0221806
	-0.023903	-0.0222414
	-0.0249347	-0.0224292
	-0.0249502	-0.0228577
	-0.0251877	-0.0231663
	-0.0257093	-0.023303
	-0.0257302	-0.0233031
	-0.0257689	-0.0233459
	-0.0257798	-0.0235173
	-0.0261807	-0.0239668
	-0.0262692	-0.0244442
	-0.0264188	-0.0245116
	-0.0270313	-0.0245515
	-0.0272734	-0.0248251
	-0.0276915	-0.0248788
	-0.0279382	-0.0249341
	-0.0279881	-0.0249401
	-0.0283622	-0.0253143
	-0.028742	-0.0253269
	-0.0287441	-0.025508
	-0.0294763	-0.0257289
	-0.0296294	-0.025838
	-0.0312585	-0.0258468
	-0.0313778	-0.0259209
	-0.0314509	-0.0261287
	-0.0318414	-0.0261942
	-0.0323159	-0.0262139
	-0.0325699	-0.0262921
	-0.0327092	-0.0263714
	-0.0331096	-0.0263815
	-0.0336018	-0.0264416
	-0.0343779	-0.0264987
	-0.0343873	-0.0265994
	-0.0344722	-0.0266921
	-0.0345572	-0.0267272
	-0.0352335	-0.0267659
	-0.0369508	-0.0267818
	-0.0370484	-0.0270109
	-0.037089	-0.0272413
	-0.0384706	-0.0275858
	-0.0387712	-0.0280895
	-0.0387922	-0.0280959
	-0.0388154	-0.0281455
	-0.0388754	-0.0281781
	-0.0394565	-0.0281929
	-0.0397658	-0.0283696
	-0.039801	-0.0284156
	-0.0411368	-0.0284298
	-0.0414534	-0.028594
	-0.0414853	-0.0286021
	-0.041934	-0.0286067
	-0.0430354	-0.0286146
	-0.0430404	-0.0286387
	-0.0433234	-0.0288605
	-0.0434829	-0.0290798
	-0.0436452	-0.0293902
	-0.0438304	-0.0294484
	-0.0442106	-0.0295186
	-0.044248	-0.0297907
	-0.0448158	-0.0298259
	-0.0449073	-0.0298982
	-0.0454247	-0.0300228
	-0.0456473	-0.0301016
	-0.0456682	-0.0302064
	-0.0461012	-0.0303354
	-0.0463527	-0.0304416
	-0.0468761	-0.0305206
	-0.04715	-0.030529
	-0.047564	-0.0306725
	-0.0479288	-0.0307224
	-0.0488796	-0.0308772
	-0.0490392	-0.030937
	-0.0491381	-0.0309996
	-0.0495135	-0.0310009
	-0.0496583	-0.0310637
	-0.0498494	-0.0311208
	-0.0499245	-0.0311347
	-0.0500451	-0.031197
	-0.0506664	-0.031334
	-0.0519927	-0.0313561
	-0.0522976	-0.031411
	-0.0526505	-0.0314554
	-0.0528527	-0.0315705
	-0.0533113	-0.0316476
	-0.0534825	-0.0317282
	-0.0537748	-0.0317668
	-0.0545784	-0.0317806
	-0.0549686	-0.0318388
	-0.0564273	-0.0318987
	-0.0566471	-0.0319218
	-0.0568534	-0.0320518
	-0.0582387	-0.0321122
	-0.0586473	-0.0321376
	-0.0587478	-0.0321691
	-0.0588393	-0.0324645
	-0.0589126	-0.0324746
	-0.0589821	-0.0325794
	-0.0590692	-0.0326148
	-0.0595544	-0.032867
	-0.0599128	-0.0329756
	-0.0602387	-0.0330368
	-0.0604839	-0.0332375
	-0.0606306	-0.033318
	-0.0606712	-0.0335231
	-0.0610251	-0.0335469
	-0.061184	-0.033579
	-0.0613564	-0.0336574
	-0.0652368	-0.0343439
	-0.0653727	-0.0343827
	-0.065456	-0.0345058
	-0.0657902	-0.0347325
	-0.0661858	-0.0348998
	-0.0667223	-0.0349218
	-0.0696275	-0.0350262
	-0.0697954	-0.0351651
	-0.0705222	-0.0351745
	-0.0708988	-0.0352705
	-0.0710266	-0.0353451
	-0.071287	-0.0353498
	-0.071582	-0.0354489
	-0.0721992	-0.0354689
	-0.0724431	-0.0355606
	-0.0725046	-0.0356389
	-0.0728353	-0.0356806
	-0.0739403	-0.0358918
	-0.0743691	-0.0358953
	-0.0744248	-0.0358984
	-0.0745119	-0.0359366
	-0.0746019	-0.0360184
	-0.0759841	-0.0360968
	-0.0763843	-0.0361266
	-0.0771319	-0.0361267
	-0.0790359	-0.0363233
	-0.0793645	-0.0363759
	-0.0796416	-0.0363817
	-0.0798903	-0.0363841
	-0.0800301	-0.0364278
	-0.0805865	-0.0367617
	-0.0817389	-0.0367814
	-0.0819159	-0.0368196
	-0.0827025	-0.0368437
	-0.0842836	-0.0368788
	-0.0846297	-0.0368847
	-0.0863777	-0.0369397
	-0.0872906	-0.0372073
	-0.0877577	-0.0372985
	-0.0881897	-0.0376029
	-0.0882959	-0.0376773
	-0.0889693	-0.037852
	-0.089676	-0.0378874
	-0.0900648	-0.0378879
	-0.0902023	-0.038011
	-0.0905203	-0.0380275
	-0.0908604	-0.0380574
	-0.0917863	-0.0380702
	-0.0924177	-0.0383019
	-0.0925895	-0.0383349
	-0.092675	-0.0384329
	-0.0929309	-0.0385952
	-0.0929677	-0.0388285
	-0.0933549	-0.0388649
	-0.0943675	-0.039207
	-0.0945815	-0.03933
	-0.0961072	-0.0393328
	-0.0963705	-0.0395302
	-0.0980766	-0.0396476
	-0.098609	-0.0396728
	-0.0987288	-0.0397177
	-0.0990205	-0.040427
	-0.0991485	-0.0408779
	-0.0994515	-0.0410521
	-0.0996537	-0.0410668
	-0.101067	-0.0412944
	-0.101127	-0.0413314
	-0.10116	-0.0414325
	-0.101508	-0.0416133
	-0.101845	-0.0416253
	-0.102303	-0.0416442
	-0.102308	-0.0416534
	-0.102563	-0.0417857
	-0.102853	-0.0419622
	-0.103172	-0.0420258
	-0.103287	-0.0420905
	-0.103724	-0.0421165
	-0.104458	-0.0421944
	-0.104868	-0.0422161
	-0.105628	-0.0422683
	-0.105675	-0.0423215
	-0.106993	-0.0423852
	-0.107955	-0.0424139
	-0.10825	-0.0424166
	-0.108477	-0.0424514
	-0.108571	-0.0425174
	-0.108631	-0.0426142
	-0.108849	-0.042933
	-0.109352	-0.0429379
	-0.109729	-0.0429697
	-0.109878	-0.0433048
	-0.110254	-0.0433261
	-0.110609	-0.0433821
	-0.112406	-0.0434086
	-0.113045	-0.0434174
	-0.114072	-0.0435277
	-0.114107	-0.0435297
	-0.114386	-0.043695
	-0.11475	-0.0437633
	-0.115274	-0.0439039
	-0.117255	-0.0439281
	-0.11776	-0.0441336
	-0.118275	-0.044188
	-0.118926	-0.0442747
	-0.119082	-0.0443315
	-0.11929	-0.0448172
	-0.119343	-0.0448894
	-0.119343	-0.044977
	-0.119489	-0.0450587
	-0.119718	-0.0451125
	-0.119855	-0.0452334
	-0.119987	-0.0455998
	-0.12015	-0.0456987
	-0.120612	-0.0457545
	-0.121306	-0.0458215
	-0.121451	-0.0464132
	-0.121829	-0.046525
	-0.122206	-0.0467022
	-0.122678	-0.0468187
	-0.122885	-0.0470096
	-0.124427	-0.0470471
	-0.124472	-0.0471859
	-0.125259	-0.0472175
	-0.125416	-0.0472473
	-0.125487	-0.047298
	-0.1263	-0.0473178
	-0.126306	-0.0473418
	-0.12648	-0.0474405
	-0.126526	-0.0474545
	-0.12733	-0.0475468
	-0.127649	-0.0475781
	-0.128272	-0.0477195
	-0.128868	-0.0478425
	-0.130095	-0.0480434
	-0.130124	-0.0480472
	-0.130124	-0.0480677
	-0.130362	-0.0484323
	-0.131378	-0.0484506
	-0.132314	-0.0484928
	-0.13273	-0.0484977
	-0.13282	-0.0485631
	-0.133034	-0.0485753
	-0.134566	-0.0487575
	-0.134778	-0.048782
	-0.135329	-0.0489565
	-0.13572	-0.04896
	-0.136281	-0.0489925
	-0.136388	-0.0491567
	-0.136705	-0.0494136
	-0.136849	-0.0495817
	-0.136986	-0.0496521
	-0.13749	-0.049909
	-0.137547	-0.0500351
	-0.138194	-0.0502492
	-0.139084	-0.0503646
	-0.139444	-0.0504617
	-0.139465	-0.0506163
	-0.140026	-0.0506538
	-0.141181	-0.0507666
	-0.141207	-0.0510583
	-0.14218	-0.0510647
	-0.142609	-0.051215
	-0.14287	-0.051406
	-0.143656	-0.0516359
	-0.144051	-0.0518992
	-0.144759	-0.0519124
	-0.146165	-0.0522687
	-0.146799	-0.0522704
	-0.14687	-0.0524507
	-0.147401	-0.0524593
	-0.147612	-0.0525221
	-0.148115	-0.0527185
	-0.148198	-0.0527532
	-0.148555	-0.0527855
	-0.148701	-0.0528356
	-0.148728	-0.053063
	-0.148827	-0.0531398
	-0.149162	-0.0532191
	-0.149195	-0.0532366
	-0.149868	-0.0535071
	-0.149921	-0.0535177
	-0.150149	-0.0536304
	-0.150202	-0.053787
	-0.150511	-0.0537975
	-0.15087	-0.05414
	-0.151004	-0.0541901
	-0.151628	-0.0542328
	-0.151877	-0.0543374
	-0.152072	-0.0543843
	-0.152766	-0.0545282
	-0.152914	-0.0545822
	-0.153192	-0.0547948
	-0.154103	-0.0548121
	-0.15421	-0.0548909
	-0.154943	-0.0550142
	-0.155329	-0.0554749
	-0.156095	-0.0556431
	-0.158762	-0.0557035
	-0.15941	-0.0557104
	-0.160324	-0.0557321
	-0.16069	-0.0557803
	-0.161406	-0.0561208
	-0.162647	-0.0564484
	-0.162765	-0.0570663
	-0.162817	-0.0571136
	-0.163298	-0.0573421
	-0.163722	-0.057371
	-0.163961	-0.0575179
	-0.164675	-0.0575572
	-0.166431	-0.0575781
	-0.167523	-0.0576732
	-0.16775	-0.0578316
	-0.16778	-0.0580879
	-0.168911	-0.0584744
	-0.169667	-0.0586725
	-0.171055	-0.0590969
	-0.171191	-0.0593398
	-0.172228	-0.059604
	-0.172617	-0.0599015
	-0.173263	-0.0599874
	-0.173825	-0.0602176
	-0.173965	-0.0603741
	-0.174192	-0.06052
	-0.174515	-0.060631
	-0.174609	-0.0607208
	-0.175333	-0.0610182
	-0.175564	-0.0610428
	-0.177418	-0.0613121
	-0.177667	-0.0613165
	-0.177879	-0.0613239
	-0.178132	-0.0613465
	-0.179584	-0.0615302
	-0.179798	-0.0619521
	-0.180238	-0.0619924
	-0.180715	-0.062326
	-0.180875	-0.0624254
	-0.181828	-0.0625119
	-0.182612	-0.0625542
	-0.18331	-0.0626016
	-0.183487	-0.0626958
	-0.183806	-0.0627518
	-0.185615	-0.0628987
	-0.186532	-0.0629493
	-0.186536	-0.0631367
	-0.187169	-0.0632017
	-0.187271	-0.063385
	-0.188224	-0.0636409
	-0.188978	-0.0637173
	-0.189545	-0.0637734
	-0.189602	-0.0640371
	-0.190899	-0.0643545
	-0.193998	-0.0644737
	-0.195433	-0.0645767
	-0.197141	-0.0646338
	-0.197286	-0.0647865
	-0.197532	-0.0647953
	-0.197585	-0.0649171
	-0.199102	-0.0649473
	-0.199444	-0.0650439
	-0.199857	-0.065049
	-0.200243	-0.0652331
	-0.200748	-0.0654232
	-0.200907	-0.0656694
	-0.204512	-0.0658166
	-0.20472	-0.065898
	-0.205574	-0.065954
	-0.206939	-0.0659565
	-0.207893	-0.066012
	-0.208332	-0.0661435
	-0.208589	-0.066211
	-0.208782	-0.0662318
	-0.208923	-0.0663076
	-0.209296	-0.0663562
	-0.209712	-0.0665591
	-0.209787	-0.0666116
	-0.21183	-0.0666522
	-0.211857	-0.0670764
	-0.211956	-0.0672683
	-0.212411	-0.0674003
	-0.214569	-0.0674668
	-0.216009	-0.0677293
	-0.216337	-0.0680823
	-0.217489	-0.0680923
	-0.218205	-0.0680963
	-0.219215	-0.0683973
	-0.219504	-0.068414
	-0.220001	-0.0685365
	-0.220286	-0.0687246
	-0.221008	-0.0687258
	-0.221048	-0.0689021
	-0.222048	-0.0689098
	-0.222465	-0.0689311
	-0.22249	-0.0689335
	-0.222609	-0.0690414
	-0.223054	-0.0692148
	-0.223235	-0.0692643
	-0.224191	-0.0693847
	-0.224352	-0.0694607
	-0.224405	-0.0694791
	-0.22557	-0.069693
	-0.226201	-0.0699323
	-0.226333	-0.0701101
	-0.226738	-0.0702498
	-0.227863	-0.0702577
	-0.229249	-0.070377
	-0.229669	-0.0703822
	-0.230578	-0.0705558
	-0.230695	-0.0706134
	-0.231131	-0.0708037
	-0.231666	-0.0709148
	-0.231739	-0.070926
	-0.231961	-0.0709373
	-0.232183	-0.0712621
	-0.232479	-0.07127
	-0.232835	-0.0718567
	-0.233163	-0.0719415
	-0.233252	-0.0719672
	-0.233987	-0.0721949
	-0.234406	-0.0726298
	-0.235509	-0.0726853
	-0.235557	-0.0728598
	-0.23658	-0.0732844
	-0.238041	-0.0738524
	-0.238128	-0.0738539
	-0.239543	-0.0738919
	-0.240091	-0.0741693
	-0.240271	-0.0744382
	-0.240401	-0.0744552
	-0.242079	-0.0745925
	-0.243442	-0.0746868
	-0.243832	-0.0747292
	-0.245073	-0.0748073
	-0.245417	-0.074876
	-0.245443	-0.0749278
	-0.246167	-0.0751433
	-0.247374	-0.0753122
	-0.247937	-0.0754843
	-0.24879	-0.0756007
	-0.249141	-0.0756415
	-0.249215	-0.0757378
	-0.249297	-0.0757586
	-0.250007	-0.0760678
	-0.250234	-0.0761935
	-0.250283	-0.0763234
	-0.251205	-0.0765099
	-0.251675	-0.0768741
	-0.252568	-0.0770974
	-0.252619	-0.0770977
	-0.252709	-0.0771003
	-0.25327	-0.0772394
	-0.253645	-0.0773382
	-0.254233	-0.0774237
	-0.254398	-0.0776149
	-0.254511	-0.0776352
	-0.255146	-0.0776712
	-0.256484	-0.0779026
	-0.256835	-0.0779427
	-0.257269	-0.0779743
	-0.25829	-0.0781075
	-0.258336	-0.0783193
	-0.258713	-0.078437
	-0.258833	-0.0785174
	-0.262519	-0.0786155
	-0.264078	-0.078772
	-0.264186	-0.0788252
	-0.264759	-0.0791126
	-0.265315	-0.0792498
	-0.265928	-0.0794167
	-0.265941	-0.0794885
	-0.266026	-0.0795877
	-0.266063	-0.0796176
	-0.268559	-0.0797932
	-0.26915	-0.0799592
	-0.269244	-0.0802813
	-0.269986	-0.0803616
	-0.270341	-0.0806959
	-0.271172	-0.0807836
	-0.271366	-0.080795
	-0.271599	-0.0808144
	-0.27327	-0.0810372
	-0.27496	-0.0813492
	-0.280153	-0.0814427
	-0.280444	-0.0814515
	-0.280919	-0.081752
	-0.281417	-0.0818376
	-0.282022	-0.0818895
	-0.284111	-0.0820045
	-0.285494	-0.0820081
	-0.285625	-0.0820655
	-0.28869	-0.0822531
	-0.291242	-0.0825577
	-0.292611	-0.0825702
	-0.293951	-0.0826585
	-0.294873	-0.0829902
	-0.29505	-0.0830452
	-0.298885	-0.0831178
	-0.301557	-0.0837056
	-0.30371	-0.0842805
	-0.304907	-0.0842871
	-0.305613	-0.0846916
	-0.306744	-0.0849657
	-0.30694	-0.0850093
	-0.308059	-0.0851153
	-0.310367	-0.0851203
	-0.311254	-0.0852257
	-0.313019	-0.0852435
	-0.314241	-0.0853449
	-0.316277	-0.0854382
	-0.317423	-0.0855383
	-0.322804	-0.0858639
	-0.324325	-0.0861179
	-0.326353	-0.0862753
	-0.326423	-0.0864113
	-0.32712	-0.0868132
	-0.33032	-0.0872334
	-0.331879	-0.0874309
	-0.333948	-0.0874798
	-0.339215	-0.0877186
	-0.340006	-0.0877472
	-0.341364	-0.0878426
	-0.341435	-0.0892117
	-0.341465	-0.0894097
	-0.342184	-0.0895273
	-0.344775	-0.0895478
	-0.345254	-0.0896033
	-0.346417	-0.0898172
	-0.347288	-0.0899332
	-0.349758	-0.090105
	-0.350897	-0.0902568
	-0.351945	-0.0903375
	-0.353344	-0.0903619
	-0.354327	-0.0904046
	-0.359331	-0.0906419
	-0.359332	-0.090684
	-0.35986	-0.0908165
[truncated: 928 more rows]
