# Supplementary material for: Tight bending of the Ndc80 complex provides intrinsic regulation of its binding to microtubules
Source: eLife. 2019 May 2;8:e44489. doi: 10.7554/eLife.44489 (PMC6516834; doi:10.7554/eLife.44489)
Supplement: Figure 5—figure supplement 1—source data 1. [file elife-44489-fig5-figsupp1-data1.xlsx]

## Sheet: Sheet1
Figure 5-figure supplement 1-source data 1		2 days, 3 slides	2 days, 3 slides	3 days, 3 slides
corrected FRET values within histograms		Ndc80 Nuf2 S2C Spc25 S154C	Ndc80 Nuf2 S2C Spc25 S154C technical replicate	Ndc80 Nuf2 S2C Spc25 S154C biological replicate
		0.887555	0.999136	3.6936
		0.880456	0.990359	2.29963
		0.875734	0.989659	2.28985
		0.846734	0.988144	2.10098
		0.835845	0.981241	1.69049
		0.829439	0.97843	1.55954
		0.829031	0.975761	1.43189
		0.81195	0.974771	1.40409
		0.807867	0.971861	1.36801
		0.794811	0.969245	1.27501
		0.793365	0.969084	1.2662
		0.777117	0.966128	1.25473
		0.771477	0.964905	1.25206
		0.768249	0.963142	1.22823
		0.76409	0.957682	1.18902
		0.763604	0.956532	1.08743
		0.759234	0.955807	1.04409
		0.758942	0.955067	1.02916
		0.757667	0.95399	1.02312
		0.753077	0.952722	1.01299
		0.739945	0.950265	1.00217
		0.739055	0.949156	0.999447
		0.737363	0.948573	0.9892
		0.737128	0.947774	0.977764
		0.731799	0.946814	0.975783
		0.72858	0.943321	0.971706
		0.727392	0.943089	0.969022
		0.726472	0.941562	0.967782
		0.725303	0.939346	0.960969
		0.720097	0.939081	0.958009
		0.720067	0.937867	0.956819
		0.718894	0.937655	0.955278
		0.711582	0.937635	0.953833
		0.7106	0.93395	0.948543
		0.704178	0.933142	0.947594
		0.703652	0.932212	0.946304
		0.702266	0.928463	0.94576
		0.698602	0.926658	0.945689
		0.698153	0.92022	0.944108
		0.695572	0.916829	0.93955
		0.693825	0.916518	0.938375
		0.693254	0.915683	0.937681
		0.686647	0.914009	0.934818
		0.685199	0.909064	0.934067
		0.682202	0.907867	0.932881
		0.677272	0.899606	0.932496
		0.671965	0.891849	0.929827
		0.670426	0.890427	0.926996
		0.669633	0.887474	0.923479
		0.66842	0.879948	0.921735
		0.664033	0.873419	0.915206
		0.660579	0.861959	0.912406
		0.658193	0.854459	0.911659
		0.655578	0.824055	0.90906
		0.653735	0.809942	0.907864
		0.650452	0.804377	0.906537
		0.64632	0.800986	0.903835
		0.640231	0.785744	0.899633
		0.638219	0.780257	0.897838
		0.635699	0.768264	0.897252
		0.634424	0.759952	0.896159
		0.631573	0.75587	0.894602
		0.631426	0.753616	0.89193
		0.629525	0.750128	0.890105
		0.628827	0.74599	0.88743
		0.624033	0.741137	0.887361
		0.623439	0.731648	0.884273
		0.614998	0.728603	0.883368
		0.612698	0.701049	0.875149
		0.609308	0.685824	0.874936
		0.602177	0.679457	0.871285
		0.600804	0.667553	0.869476
		0.599632	0.660099	0.869385
		0.597232	0.659799	0.865459
		0.586905	0.658484	0.864525
		0.581901	0.650879	0.859933
		0.581078	0.64653	0.852345
		0.579422	0.645264	0.850103
		0.577166	0.64159	0.847877
		0.564168	0.641216	0.847788
		0.561628	0.637405	0.836347
		0.559286	0.631014	0.830836
		0.557444	0.627738	0.829367
		0.556402	0.626161	0.829164
		0.553861	0.624277	0.823775
		0.552709	0.623372	0.814403
		0.552603	0.617257	0.808426
		0.551872	0.600937	0.807539
		0.548071	0.600087	0.797537
		0.540308	0.59136	0.797473
		0.538995	0.585825	0.786304
		0.537797	0.581992	0.786001
		0.536687	0.580436	0.785359
		0.534797	0.579753	0.777155
		0.533805	0.57583	0.771393
		0.533669	0.571586	0.768919
		0.532748	0.570607	0.767587
		0.532275	0.570572	0.765059
		0.530459	0.570247	0.764684
		0.529369	0.569146	0.762639
		0.524146	0.568379	0.759986
		0.521609	0.566698	0.758904
		0.518593	0.558543	0.757636
		0.518403	0.558351	0.754859
		0.513047	0.553194	0.748483
		0.51019	0.553083	0.748446
		0.502544	0.551289	0.746747
		0.497652	0.549598	0.745258
		0.495608	0.539166	0.742511
		0.492421	0.537144	0.742374
		0.490847	0.534373	0.736944
		0.487954	0.532884	0.733474
		0.48778	0.531646	0.729308
		0.486966	0.529485	0.723239
		0.486328	0.52908	0.716893
		0.485688	0.528717	0.710009
		0.48209	0.527901	0.704837
		0.478952	0.527282	0.70316
		0.476797	0.525222	0.702876
		0.475732	0.523027	0.701232
		0.475047	0.518887	0.700477
		0.472786	0.514593	0.698848
		0.468986	0.512813	0.697335
		0.465676	0.512298	0.696251
		0.462046	0.505261	0.696006
		0.459929	0.504547	0.694993
		0.457485	0.503525	0.682011
		0.45541	0.498179	0.679365
		0.454217	0.496131	0.671707
		0.453694	0.493376	0.666021
		0.445063	0.493133	0.665935
		0.439469	0.490502	0.664506
		0.436728	0.489908	0.662411
		0.43311	0.47994	0.660426
		0.428424	0.479844	0.6577
		0.421353	0.479141	0.654633
		0.405975	0.470062	0.650701
		0.405355	0.469827	0.648687
		0.404329	0.464944	0.647712
		0.404187	0.460552	0.647357
		0.398569	0.4536	0.647286
		0.398401	0.443462	0.642462
		0.393807	0.437461	0.642447
		0.393218	0.437169	0.640531
		0.390715	0.434828	0.639808
		0.388181	0.431452	0.63829
		0.380492	0.428382	0.63175
		0.378576	0.427842	0.626987
		0.370092	0.426999	0.619333
		0.364262	0.41496	0.617498
		0.363374	0.414159	0.61713
		0.362435	0.413496	0.60986
		0.357978	0.413453	0.609471
		0.355671	0.409116	0.609263
		0.354831	0.407954	0.608806
		0.352095	0.404973	0.604154
		0.351101	0.402687	0.602983
		0.350998	0.402632	0.559472
		0.344041	0.401125	0.55716
		0.331704	0.398564	0.556729
		0.330747	0.397764	0.538197
		0.330461	0.397666	0.535579
		0.33018	0.397562	0.53442
		0.329445	0.396404	0.528609
		0.328739	0.394551	0.525747
		0.32793	0.392394	0.519158
		0.32039	0.392326	0.515426
		0.320207	0.389473	0.512628
		0.319429	0.389059	0.506797
		0.318838	0.388423	0.506728
		0.318822	0.3827	0.504585
		0.314427	0.376595	0.492159
		0.313832	0.37293	0.484612
		0.312205	0.372474	0.461254
		0.310218	0.369217	0.45824
		0.306408	0.368404	0.453288
		0.305512	0.364335	0.439321
		0.304992	0.362924	0.436318
		0.300692	0.361691	0.432894
		0.299046	0.361536	0.431797
		0.297453	0.361176	0.430348
		0.296012	0.35517	0.429511
		0.295975	0.351466	0.429041
		0.29386	0.350616	0.427845
		0.293154	0.350022	0.422947
		0.292954	0.347981	0.420162
		0.290691	0.346172	0.41726
		0.285303	0.345111	0.415991
		0.282823	0.338621	0.415075
		0.282698	0.338099	0.413898
		0.281751	0.337968	0.403112
		0.280685	0.336634	0.401635
		0.280064	0.336377	0.398668
		0.279008	0.335209	0.392071
		0.278691	0.332236	0.391766
		0.277891	0.324713	0.391
		0.275638	0.323116	0.390864
		0.268578	0.320607	0.381954
		0.268282	0.320024	0.377778
		0.266986	0.319507	0.377497
		0.263871	0.312785	0.377205
		0.262157	0.309432	0.366094
		0.261345	0.308165	0.357156
		0.260356	0.304012	0.350299
		0.257536	0.30331	0.345148
		0.257308	0.301429	0.339815
		0.257218	0.300877	0.311474
		0.256588	0.294598	0.31032
		0.252652	0.29372	0.301725
		0.252085	0.293415	0.299224
		0.251711	0.291207	0.294471
		0.251218	0.290431	0.26833
		0.251074	0.287501	0.268261
		0.250469	0.285758	0.267639
		0.250128	0.284752	0.267053
		0.249328	0.284279	0.258761
		0.248329	0.276746	0.254677
		0.247033	0.275539	0.253634
		0.246968	0.274958	0.252507
		0.246171	0.272502	0.251408
		0.246027	0.268786	0.250705
		0.245637	0.26838	0.24996
		0.245545	0.26827	0.248058
		0.24495	0.268166	0.246234
		0.243651	0.257818	0.244937
		0.243018	0.257568	0.242517
		0.242217	0.255976	0.241317
		0.241215	0.255902	0.240927
		0.238264	0.249463	0.240254
		0.237051	0.248615	0.238437
		0.236947	0.245327	0.236991
		0.236603	0.240535	0.235652
		0.236433	0.233297	0.234671
		0.236059	0.232451	0.234203
		0.235558	0.226397	0.233563
		0.235457	0.222868	0.23261
		0.234321	0.220448	0.231324
		0.234045	0.210288	0.225132
		0.233382	0.204906	0.224192
		0.2332	0.204528	0.219546
		0.232498	0.204242	0.21832
		0.232447	0.204111	0.21763
		0.232194	0.204098	0.21724
		0.230598	0.203355	0.216959
		0.229975	0.202207	0.216857
		0.22854	0.201216	0.216611
		0.228512	0.20111	0.214292
		0.228491	0.199805	0.214132
		0.228136	0.198776	0.214126
		0.226937	0.198131	0.212244
		0.225793	0.197777	0.210294
		0.22552	0.195466	0.210131
		0.223326	0.194257	0.209348
		0.223132	0.192598	0.208292
		0.222623	0.192572	0.207419
		0.221528	0.190037	0.205311
		0.220948	0.189154	0.205237
		0.220825	0.187971	0.203499
		0.220335	0.187794	0.200396
		0.220181	0.187171	0.200071
		0.219949	0.180902	0.199573
		0.219444	0.180151	0.199012
		0.217191	0.18015	0.197599
		0.217077	0.179091	0.196025
		0.215984	0.178397	0.195146
		0.215003	0.177887	0.195028
		0.213847	0.177509	0.191517
		0.213653	0.176953	0.191341
		0.211732	0.175765	0.189461
		0.210965	0.17323	0.188674
		0.210317	0.171896	0.18651
		0.210197	0.171363	0.186287
		0.207683	0.171256	0.185465
		0.207269	0.169179	0.182054
		0.206476	0.167667	0.180944
		0.205888	0.165944	0.180831
		0.204438	0.16571	0.180582
		0.204396	0.165481	0.17998
		0.204204	0.165027	0.179526
		0.203626	0.162049	0.178232
		0.20318	0.160575	0.17527
		0.202005	0.156949	0.172279
		0.201879	0.155378	0.171642
		0.199348	0.154882	0.168004
		0.198729	0.154462	0.163241
		0.198702	0.153883	0.16296
		0.198312	0.153617	0.162209
		0.198056	0.1514	0.161921
		0.197014	0.15089	0.161537
		0.196246	0.149054	0.160808
		0.195538	0.146902	0.159642
		0.19487	0.146449	0.157105
		0.194205	0.145074	0.155331
		0.193523	0.144524	0.154499
		0.193274	0.143547	0.153396
		0.192272	0.141048	0.15313
		0.191703	0.139759	0.152642
		0.191151	0.139082	0.152475
		0.190458	0.135998	0.151816
		0.189677	0.135521	0.147953
		0.189437	0.135509	0.146405
		0.185421	0.133765	0.146355
		0.185297	0.133568	0.14575
		0.184036	0.133273	0.140103
		0.183927	0.132783	0.139479
		0.183146	0.131821	0.138987
		0.180773	0.131602	0.138077
		0.179934	0.131111	0.136365
		0.179468	0.130826	0.136333
		0.179459	0.130163	0.1362
		0.17844	0.128667	0.13328
		0.177703	0.127968	0.131721
		0.176954	0.127698	0.131607
		0.175876	0.12629	0.131603
		0.175026	0.126279	0.131499
		0.174812	0.124855	0.130441
		0.174268	0.124286	0.12984
		0.173022	0.123357	0.128911
		0.172875	0.123351	0.128895
		0.172398	0.1232	0.128524
		0.17145	0.123128	0.12834
		0.170337	0.123026	0.12774
		0.168431	0.122573	0.12769
		0.167668	0.122373	0.127513
		0.167171	0.122283	0.127183
		0.164931	0.121545	0.126026
		0.164901	0.12134	0.124686
		0.164179	0.119992	0.123089
		0.163506	0.119192	0.119943
		0.163457	0.118811	0.118547
		0.163	0.117874	0.115364
		0.161056	0.117265	0.1151
		0.160815	0.1156	0.114996
		0.160293	0.115539	0.114825
		0.159878	0.115489	0.114346
		0.15766	0.114804	0.11287
		0.157517	0.114444	0.112406
		0.157269	0.113493	0.111931
		0.156803	0.112933	0.110328
		0.156601	0.112925	0.110206
		0.156201	0.112794	0.109986
		0.156072	0.111976	0.109748
		0.154075	0.10997	0.109496
		0.153924	0.108721	0.109273
		0.15193	0.107893	0.10849
		0.151726	0.107675	0.108191
		0.151345	0.106718	0.107493
		0.150752	0.106392	0.106193
		0.148732	0.105927	0.105442
		0.148697	0.104055	0.104979
		0.148194	0.102794	0.103553
		0.148161	0.10275	0.103457
		0.148053	0.101556	0.103254
		0.146972	0.10132	0.103161
		0.146969	0.0988962	0.102985
		0.145703	0.0985533	0.101869
		0.145657	0.0985121	0.101258
		0.145619	0.098062	0.100344
		0.145297	0.097142	0.100247
		0.144258	0.0960705	0.0999595
		0.141836	0.0955317	0.0950257
		0.141303	0.0951028	0.0944892
		0.140876	0.0948368	0.0940394
		0.140559	0.0940837	0.0937874
		0.139899	0.0935136	0.0934641
		0.139629	0.0925549	0.0933248
		0.13957	0.0916518	0.0928967
		0.13826	0.091356	0.0926144
		0.138244	0.0904731	0.0918977
		0.1377	0.0903206	0.0915402
		0.137197	0.0899928	0.090702
		0.13674	0.0894691	0.0906646
		0.136126	0.0881022	0.0901751
		0.135614	0.087372	0.0901084
		0.134879	0.0872301	0.0900129
		0.13276	0.0870327	0.0899127
		0.131655	0.0869023	0.0894429
		0.131561	0.086766	0.089408
		0.131306	0.0849294	0.0883958
		0.130949	0.0839387	0.0881923
		0.130767	0.0835701	0.0878784
		0.130505	0.0832661	0.0871943
		0.129924	0.0832177	0.0861625
		0.129585	0.0830104	0.0859291
		0.128089	0.0826589	0.0843619
		0.127062	0.0825355	0.0832371
		0.126905	0.0814592	0.0830423
		0.126903	0.0814206	0.0818826
		0.126608	0.0792291	0.081514
		0.125708	0.078667	0.0812362
		0.124996	0.0785769	0.0808882
		0.124519	0.0780938	0.0807135
		0.123707	0.0779864	0.0805593
		0.123473	0.0770743	0.0805268
		0.120012	0.0769492	0.0799965
		0.119774	0.0765908	0.0791042
		0.117644	0.0760812	0.0789481
		0.117482	0.0758566	0.0771613
		0.116245	0.0753702	0.0766313
		0.115967	0.0752218	0.0760708
		0.115238	0.0747415	0.0752545
		0.114722	0.0738639	0.0748166
		0.114171	0.0737431	0.074699
		0.113585	0.0734621	0.0740578
		0.113526	0.0733848	0.0733284
		0.11344	0.0713213	0.0722725
		0.11338	0.070204	0.0721403
		0.113187	0.0693252	0.0711059
		0.112307	0.0690447	0.070888
		0.111251	0.0662524	0.0700669
		0.110995	0.0654785	0.0698358
		0.110265	0.0651463	0.0698125
		0.109824	0.0644072	0.0695155
		0.10962	0.0638087	0.0675816
		0.109225	0.0633526	0.0665321
		0.108815	0.062207	0.0662584
		0.106334	0.0617745	0.0661905
		0.105809	0.0601776	0.065988
		0.105709	0.0585476	0.0656576
		0.105692	0.0582035	0.0655506
		0.105527	0.0575972	0.0653104
		0.105382	0.0574319	0.0637632
		0.104932	0.056617	0.0637112
		0.104624	0.0561967	0.0636187
		0.103625	0.0560619	0.0631332
		0.102371	0.056004	0.0627987
		0.101441	0.0559649	0.0619945
		0.101229	0.0558877	0.0619573
		0.100322	0.0547959	0.0617877
		0.0991541	0.0539578	0.0615978
		0.0986874	0.053414	0.0615904
		0.0985227	0.0518724	0.0598843
		0.0978276	0.051275	0.059835
		0.0965176	0.0506521	0.0597204
		0.0958078	0.0495389	0.0596399
		0.0954365	0.0492657	0.0594082
		0.095422	0.0484648	0.0593191
		0.0951151	0.048245	0.0588454
		0.0930593	0.046852	0.0583389
		0.0909628	0.0464107	0.0580522
		0.0902408	0.0459013	0.0563856
		0.090225	0.0455239	0.0561763
		0.0898095	0.045491	0.0557946
		0.0897751	0.0454812	0.0543021
		0.0896954	0.0451956	0.054292
		0.0877587	0.0450096	0.0534001
		0.0866966	0.04409	0.0530157
		0.0865162	0.0434001	0.052476
		0.0861829	0.0431439	0.0519585
		0.0859951	0.04306	0.0510174
		0.0851919	0.0427436	0.0506242
		0.0840193	0.0421635	0.0500782
		0.0837752	0.0405943	0.0492728
		0.0836164	0.0398781	0.0492396
		0.0832963	0.0389638	0.0490094
		0.0828976	0.0376986	0.0489238
		0.0826162	0.0370697	0.0484173
		0.0825355	0.0370352	0.0475701
		0.0817536	0.03547	0.0472079
		0.0810482	0.0352557	0.0463904
		0.0803542	0.0336466	0.0460075
		0.079554	0.0332751	0.045655
		0.0794106	0.0322898	0.0445934
		0.0793965	0.0288037	0.0439554
		0.0792742	0.028285	0.0437673
		0.0780514	0.027223	0.0436578
		0.0775774	0.0269233	0.0434802
		0.0765493	0.0269058	0.0425268
		0.0759416	0.0265763	0.0414598
		0.0757914	0.0265297	0.0412202
		0.0751291	0.0257851	0.040145
		0.0746144	0.0253732	0.0390067
		0.0745783	0.0250712	0.0387024
		0.073589	0.0246571	0.0382143
		0.0730184	0.0234215	0.0379376
		0.0729413	0.0231398	0.0377397
		0.0717165	0.0224597	0.0371687
		0.0703905	0.0219088	0.0367896
		0.069972	0.0218485	0.0363463
		0.0695263	0.0218085	0.0359385
		0.069035	0.0209695	0.0359357
		0.0689835	0.019704	0.0358445
		0.0687367	0.0174729	0.0354075
		0.068707	0.0171131	0.0353784
		0.0668578	0.0151263	0.0353212
		0.0668529	0.014657	0.0350152
		0.0668352	0.0132427	0.0347335
		0.0664681	0.0126866	0.034692
		0.0659557	0.0113696	0.0346574
		0.0647764	0.010304	0.0346483
		0.0639469	0.0087749	0.0340725
		0.0632249	0.0079087	0.0340273
		0.0629121	0.00771931	0.0338985
		0.0625187	0.0069914	0.0336934
		0.0623785	0.00651879	0.0334421
		0.06236	0.00576312	0.0328078
		0.0616618	0.00564521	0.0325376
		0.0613764	0.00509724	0.0324196
		0.0609775	0.00387771	0.0322876
		0.0599976	0.00296007	0.0320113
		0.0592901	0.00109283	0.0314526
		0.0591147	0.000922665	0.0307858
		0.0590211	-0.000558239	0.030472
		0.0589001	-0.000910728	0.030066
		0.0584108	-0.00162428	0.0298681
		0.0583426	-0.0023963	0.0294038
		0.0574746	-0.00301829	0.0292658
		0.0560403	-0.0043595	0.029106
		0.0558914	-0.00586767	0.0284901
		0.0552999	-0.00658527	0.0283239
		0.0551621	-0.00752188	0.0282674
		0.0551575	-0.00803293	0.0271105
		0.0542268	-0.0088726	0.0265874
		0.0541128	-0.0098214	0.0255236
		0.0528797	-0.0114803	0.0251598
		0.0526389	-0.0116342	0.0250207
		0.0526075	-0.0132648	0.0247593
		0.052242	-0.0141096	0.0244283
		0.0517854	-0.0151062	0.0243123
		0.051388	-0.0164055	0.0236575
		0.0509557	-0.019975	0.0235762
		0.049476	-0.0206974	0.0232543
		0.0493134	-0.0214043	0.0230078
		0.0478258	-0.0228175	0.0229712
		0.0473842	-0.0249347	0.0229488
		0.0473708	-0.0257689	0.0223026
		0.046354	-0.0270313	0.0222999
		0.0459716	-0.0272734	0.0216887
		0.0450605	-0.0279382	0.0214345
		0.0442803	-0.0312585	0.0212597
		0.0437037	-0.0314509	0.0212021
		0.0433893	-0.0318414	0.0207126
		0.0432292	-0.0327092	0.0205896
		0.0431137	-0.0331096	0.0202798
		0.0430813	-0.0336018	0.0191388
		0.0426615	-0.0343779	0.0182432
		0.0424947	-0.0387712	0.0171651
		0.0419876	-0.0387922	0.016359
		0.0410798	-0.0388154	0.0161692
		0.0403349	-0.0397658	0.0159826
		0.0399457	-0.0411368	0.0158791
		0.0398852	-0.0414853	0.0156073
		0.0392403	-0.0430354	0.0152378
		0.0385297	-0.0430404	0.0148924
		0.0383085	-0.0436452	0.0143393
		0.036919	-0.0442106	0.0141083
		0.0363221	-0.0468761	0.0140999
		0.0354139	-0.0479288	0.0135043
		0.035018	-0.0495135	0.0124982
		0.0346906	-0.0499245	0.0124483
		0.0346262	-0.0519927	0.0115972
		0.0341777	-0.0522976	0.0113496
		0.0329103	-0.0545784	0.0107709
		0.0322423	-0.0549686	0.00966422
		0.0321959	-0.0566471	0.0096362
		0.0317673	-0.0568534	0.00937363
		0.0310339	-0.0582387	0.00852375
		0.0305876	-0.0586473	0.00841972
		0.0304964	-0.0587478	0.00818115
		0.0304446	-0.0589126	0.0081076
		0.0304367	-0.0604839	0.00776238
		0.030104	-0.065456	0.00733782
		0.0296109	-0.0661858	0.00733775
		0.0293636	-0.0667223	0.0073197
		0.0290449	-0.0697954	0.00637664
		0.0275852	-0.071582	0.00597748
		0.0268789	-0.0725046	0.00588594
		0.0262272	-0.0744248	0.00526771
		0.0258426	-0.0793645	0.00516928
		0.0257405	-0.0863777	0.0051257
		0.0251039	-0.089676	0.00490883
		0.0246936	-0.0900648	0.00483384
		0.0246211	-0.0905203	0.00436487
		0.0244551	-0.0929309	0.00435282
		0.0244056	-0.0943675	0.0033132
		0.0235172	-0.0945815	0.00311254
		0.023492	-0.0961072	0.00252821
		0.0232428	-0.0991485	0.00243321
		0.0232213	-0.102308	0.00224558
		0.0231391	-0.102563	0.00217823
		0.0231029	-0.102853	0.00162849
		0.022784	-0.103172	0.00151888
		0.021767	-0.105628	0.00151729
		0.0199576	-0.107955	0.00151269
		0.0198579	-0.10825	0.00147996
		0.0196288	-0.108477	1.29266e-05
		0.019475	-0.108571	-2.06664e-05
		0.0192438	-0.108631	-0.00076396
		0.0189847	-0.108849	-0.000892206
		0.0187127	-0.109352	-0.000895702
		0.0184983	-0.109729	-0.00122125
		0.0184064	-0.109878	-0.00186712
		0.0174506	-0.112406	-0.003538
		0.0171615	-0.118275	-0.00428711
		0.0168037	-0.118926	-0.0044931
		0.0163288	-0.11929	-0.00482062
		0.0159652	-0.119343	-0.00508222
		0.0158989	-0.119718	-0.00521448
		0.0158528	-0.120612	-0.0054311
		0.0157559	-0.125259	-0.00636096
		0.0155766	-0.125487	-0.0063772
		0.0150335	-0.126526	-0.0067781
		0.0144413	-0.128272	-0.00689735
		0.0144295	-0.130124	-0.00692745
		0.013246	-0.130362	-0.00714687
		0.0120663	-0.13273	-0.00767324
		0.0114743	-0.13282	-0.0079597
		0.0114286	-0.136388	-0.00820623
		0.0111535	-0.136705	-0.00823204
		0.010935	-0.136849	-0.00835385
		0.0103107	-0.13749	-0.0104324
		0.0095249	-0.138194	-0.0109209
		0.00891685	-0.141181	-0.0116462
		0.00871746	-0.141207	-0.0116635
		0.00821012	-0.146165	-0.0119223
		0.00738358	-0.14687	-0.012504
		0.00730105	-0.148555	-0.0125043
		0.00458714	-0.148728	-0.0126543
		0.00432664	-0.148827	-0.0132455
		0.0020472	-0.150511	-0.0133102
		0.00203339	-0.151628	-0.0139391
		0.00193052	-0.151877	-0.0150389
		0.00136843	-0.154103	-0.0157272
		0.000560257	-0.156095	-0.0157581
		0.000543193	-0.162647	-0.0157815
		7.21268e-05	-0.163722	-0.0159272
		-0.000204885	-0.166431	-0.0160322
		-0.000540419	-0.167523	-0.0162048
		-0.00206773	-0.16775	-0.0166173
		-0.00231938	-0.174192	-0.0175901
		-0.00268776	-0.177418	-0.0177276
		-0.00294276	-0.177879	-0.0190811
		-0.00340592	-0.180238	-0.0191847
		-0.0048381	-0.180715	-0.0193871
		-0.00524173	-0.181828	-0.0195886
		-0.00567291	-0.182612	-0.0214559
		-0.00601747	-0.185615	-0.0219234
		-0.00645185	-0.187169	-0.0220648
		-0.00647175	-0.188224	-0.0223939
		-0.00648256	-0.188978	-0.0226757
		-0.00660535	-0.190899	-0.0228402
		-0.00711709	-0.195433	-0.0229467
		-0.009082	-0.197532	-0.0234081
		-0.0102593	-0.200748	-0.0236602
		-0.0116845	-0.20472	-0.0244878
		-0.0117017	-0.208332	-0.0249448
		-0.0117609	-0.208782	-0.0249819
		-0.0121047	-0.209712	-0.0257153
		-0.0126918	-0.220001	-0.0258436
		-0.0136702	-0.222048	-0.026612
		-0.014077	-0.222465	-0.0296356
		-0.0142162	-0.223235	-0.0299198
		-0.015008	-0.224405	-0.030123
		-0.0159476	-0.227863	-0.0302724
		-0.0168518	-0.229249	-0.0308207
		-0.0183126	-0.229669	-0.0308233
		-0.018421	-0.230578	-0.0311787
		-0.0193925	-0.230695	-0.031189
		-0.0197386	-0.231131	-0.0314777
		-0.0203623	-0.231739	-0.0318239
		-0.020852	-0.231961	-0.0318754
		-0.0208946	-0.232183	-0.0327629
		-0.0218965	-0.232479	-0.0328114
		-0.022369	-0.233163	-0.034038
		-0.0228883	-0.235509	-0.0341064
		-0.0229035	-0.235557	-0.0342074
		-0.0237552	-0.238128	-0.0355478
		-0.023903	-0.240091	-0.0361372
		-0.0249502	-0.240401	-0.0364345
		-0.0251877	-0.245443	-0.0364814
		-0.0257093	-0.250234	-0.0366467
		-0.0257302	-0.250283	-0.0382735
		-0.0257798	-0.251205	-0.0383626
		-0.0261807	-0.253645	-0.0386749
		-0.0264188	-0.258833	-0.0403735
		-0.0276915	-0.262519	-0.040644
		-0.0283622	-0.264078	-0.0413448
		-0.0287441	-0.264759	-0.0431508
		-0.0294763	-0.265315	-0.0436397
		-0.0313778	-0.268559	-0.0442763
		-0.0323159	-0.26915	-0.0444988
		-0.0343873	-0.269986	-0.046076
		-0.0344722	-0.27327	-0.0465319
		-0.0345572	-0.27496	-0.0478396
		-0.0369508	-0.291242	-0.0496043
		-0.0370484	-0.30694	-0.0499327
		-0.0384706	-0.310367	-0.0505425
		-0.039801	-0.314241	-0.0511038
		-0.0414534	-0.316277	-0.05132
		-0.041934	-0.333948	-0.0514127
		-0.0434829	-0.340006	-0.0523857
		-0.0438304	-0.344775	-0.0526715
		-0.044248	-0.347288	-0.0528108
		-0.0448158	-0.359332	-0.0531368
		-0.0449073	-0.35986	-0.0533275
		-0.0454247	-0.370118	-0.0540839
		-0.0461012	-0.370536	-0.0552645
		-0.04715	-0.382199	-0.0561207
		-0.047564	-0.383454	-0.0577136
		-0.0488796	-0.445253	-0.0590994
		-0.0490392	-0.455429	-0.0593369
		-0.0491381	-0.48927	-0.0599567
		-0.0496583	-0.490069	-0.0607019
		-0.0498494	-0.635364	-0.0611074
		-0.0500451		-0.0628792
		-0.0506664		-0.0631422
		-0.0534825		-0.0649293
		-0.0564273		-0.065195
		-0.0588393		-0.0653992
		-0.0589821		-0.0660489
		-0.0595544		-0.0669317
		-0.0602387		-0.0683524
		-0.0606306		-0.068739
		-0.0606712		-0.0689178
		-0.0610251		-0.0694083
		-0.061184		-0.069537
		-0.0613564		-0.0702178
		-0.0652368		-0.070339
		-0.0653727		-0.0712491
		-0.0705222		-0.0716737
		-0.0721992		-0.071889
		-0.0724431		-0.0726507
		-0.0728353		-0.0732453
		-0.0739403		-0.0734416
		-0.0746019		-0.0738094
		-0.0763843		-0.074034
		-0.0771319		-0.0742822
		-0.0790359		-0.0759782
		-0.0796416		-0.0763238
		-0.0798903		-0.0771247
		-0.0800301		-0.0794008
		-0.0805865		-0.0794651
		-0.0817389		-0.0801727
		-0.0819159		-0.0805523
		-0.0827025		-0.0805929
		-0.0842836		-0.0814817
		-0.0846297		-0.0820164
		-0.0872906		-0.0828316
		-0.0877577		-0.0829317
		-0.0881897		-0.0843389
		-0.0882959		-0.0856977
		-0.0889693		-0.0883751
		-0.0929677		-0.088837
		-0.0933549		-0.088866
		-0.0963705		-0.0890082
		-0.0987288		-0.0891695
		-0.101067		-0.0905917
		-0.101127		-0.0907456
		-0.10116		-0.0908291
		-0.102303		-0.0914562
		-0.103287		-0.0931026
		-0.103724		-0.0935448
		-0.104458		-0.0946715
		-0.105675		-0.0951876
		-0.106993		-0.0968037
		-0.110254		-0.0980694
		-0.110609		-0.0989978
		-0.113045		-0.0991971
		-0.114107		-0.100681
		-0.117255		-0.101039
		-0.119489		-0.101125
		-0.119855		-0.102366
		-0.12015		-0.104481
		-0.121306		-0.104814
		-0.121451		-0.105245
		-0.121829		-0.109608
		-0.122206		-0.109652
		-0.124427		-0.112565
		-0.124472		-0.112645
		-0.125416		-0.113997
		-0.1263		-0.114578
		-0.126306		-0.117725
		-0.12733		-0.119734
		-0.128868		-0.120166
		-0.130095		-0.120724
		-0.130124		-0.120751
		-0.131378		-0.121346
		-0.132314		-0.121596
		-0.134778		-0.122718
		-0.13572		-0.126444
		-0.139084		-0.12674
		-0.139444		-0.127269
		-0.139465		-0.127674
		-0.140026		-0.127996
		-0.14218		-0.131719
		-0.14287		-0.132087
		-0.143656		-0.132321
		-0.144051		-0.132782
		-0.146799		-0.135063
		-0.147401		-0.13813
		-0.147612		-0.13909
		-0.148115		-0.139129
		-0.148198		-0.139896
		-0.148701		-0.142531
		-0.149195		-0.143247
		-0.149868		-0.143708
		-0.149921		-0.144981
		-0.152766		-0.146259
		-0.152914		-0.147029
		-0.153192		-0.147417
		-0.15421		-0.157827
		-0.154943		-0.15923
		-0.155329		-0.161885
		-0.158762		-0.162028
		-0.160324		-0.162379
		-0.161406		-0.163433
		-0.162817		-0.170225
		-0.164675		-0.170455
		-0.16778		-0.175227
		-0.169667		-0.176074
		-0.171055		-0.178709
		-0.172228		-0.179301
		-0.173263		-0.180011
		-0.173825		-0.182041
		-0.173965		-0.206168
		-0.174515		-0.206459
		-0.175564		-0.210311
		-0.177667		-0.210491
		-0.178132		-0.212866
		-0.179798		-0.236705
		-0.180875		-0.23888
		-0.183487		-0.250248
		-0.183806		-0.252066
		-0.186532		-0.256472
		-0.189545		-0.262507
		-0.189602		-0.264208
		-0.197585		-0.264716
		-0.199444		-0.268442
		-0.199857		-0.272474
		-0.204512		-0.272551
		-0.206939		-0.277185
		-0.207893		-0.297842
		-0.209296		-0.301112
		-0.209787		-0.305195
		-0.21183		-0.314456
		-0.212411		-0.343399
		-0.214569		-0.354606
		-0.217489		-0.354954
		-0.218205		-0.368991
		-0.219215		-0.517343
		-0.220286		-0.913455
		-0.221008		-2.71988
		-0.22249		-3.94316
		-0.224352		4.62418
		-0.226201		4.39089
		-0.232835		2.73648
		-0.233252		2.3357
		-0.23658		1.7742
		-0.239543		1.24184
		-0.242079		1.14621
		-0.243832		1.11204
		-0.245073		1.06606
		-0.245417		1.05767
		-0.246167		1.04431
		-0.247937		1.04035
		-0.24879		1.02107
		-0.249141		1.01915
		-0.249297		1.01897
		-0.250007		1.01822
		-0.252619		1.01602
		-0.252709		1.01142
		-0.25327		1.00972
		-0.254233		1.00823
		-0.254511		1.00794
		-0.256484		1.00742
		-0.256835		1.00437
		-0.257269		1.00373
		-0.25829		1.00303
		-0.258713		1.00111
		-0.266026		1.00026
		-0.266063		0.999752
		-0.269244		0.997295
		-0.270341		0.9909
		-0.271172		0.990577
		-0.271599		0.990012
		-0.280919		0.989069
		-0.282022		0.988499
		-0.284111		0.985827
		-0.294873		0.98395
		-0.304907		0.983075
		-0.306744		0.981393
		-0.308059		0.981064
		-0.326423		0.979506
		-0.33032		0.9781
		-0.339215		0.976223
		-0.341435		0.974071
		-0.341465		0.969598
		-0.342184		0.969438
		-0.345254		0.968919
		-0.350897		0.968428
		-0.374013		0.968314
		-0.375827		0.967166
		-0.385037		0.958155
		-0.389803		0.956574
		-0.390119		0.9542
		-0.393172		0.952817
		-0.400165		0.951114
		-0.412666		0.949961
		-0.444273		0.949592
		-0.45811		0.9463
		-0.45884		0.940475
		-0.459374		0.939146
		-0.481816		0.932033
		-0.486587		0.931116
		-0.488307		0.928124
		-0.510118		0.926446
		-0.516389		0.925854
		-0.531623		0.924082
		-0.536314		0.924033
		-0.54031		0.921411
		-0.544064		0.917315
		-0.555203		0.913391
		-0.607489		0.911501
		-0.677799		0.910939
		-0.771245		0.90828
		-0.899283		0.899017
		1.1681		0.898692
		1.1266		0.898387
		1.11795		0.897168
		1.11671		0.896069
		1.10166		0.892759
		1.07816		0.8914
		1.0755		0.890545
		1.0691		0.890535
		1.06809		0.890511
		1.06687		0.889383
		1.06496		0.887905
		1.05791		0.887374
		1.05675		0.887359
		1.05609		0.88722
		1.05563		0.884358
		1.05224		0.881792
		1.05093		0.879911
		1.04592		0.877331
		1.04379		0.876171
		1.03625		0.874931
		1.03536		0.872345
		1.03317		0.871826
		1.03245		0.870157
		1.03064		0.869736
		1.02884		0.869244
		1.02871		0.868542
		1.02585		0.86748
		1.02427		0.867099
		1.01932		0.860127
		1.01824		0.858648
		1.01647		0.858287
		1.0132		0.855066
		1.00906		0.85452
		1.00892		0.853959
		1.00854		0.853821
		1.00752		0.853129
		1.0066		0.853061
		1.00631		0.852931
		1.0029		0.85114
		1.00245		0.850112
		0.997579		0.848409
		0.992406		0.847888
		0.992114		0.845164
		0.990875		0.843344
		0.988756		0.842281
		0.988296		0.837023
		0.986805		0.833741
		0.986011		0.833053
		0.98556		0.832413
		0.983453		0.827864
		0.981133		0.818903
		0.980682		0.815569
		0.980532		0.814367
		0.974223		0.808574
		0.973651		0.8018
		0.964168		0.801104
		0.957414		0.799642
		0.945164		0.796467
		0.931381		0.793848
		0.904025		0.788197
		0.88019		0.786529
		0.868645		0.781871
		0.864225		0.779639
		0.853328		0.777864
		0.843939		0.776251
		0.837166		0.773286
		0.833514		0.762062
		0.821856		0.761255
		0.818426		0.758351
		0.813281		0.752475
		0.811143		0.743597
		0.80104		0.741981
		0.787026		0.741213
		0.783865		0.741175
		0.780836		0.737982
		0.778513		0.7337
		0.772204		0.730955
		0.769637		0.730754
		0.769221		0.729312
		0.762355		0.722415
		0.748558		0.713947
		0.743405		0.712086
		0.743048		0.710977
		0.740211		0.710938
		0.738624		0.710536
		0.736865		0.710259
		0.726734		0.70342
		0.720691		0.700029
		0.720341		0.692668
		0.717003		0.687118
		0.711636		0.686334
		0.706325		0.684722
		0.692581		0.684292
		0.690999		0.682091
		0.681446		0.681574
		0.680074		0.677536
		0.654484		0.676076
		0.643053		0.672412
		0.637729		0.671352
		0.63764		0.671296
		0.637054		0.669763
		0.63045		0.669647
		0.625457		0.668036
		0.625282		0.656352
		0.6191		0.654873
		0.617745		0.651554
		0.615236		0.651178
		0.602956		0.645769
		0.580167		0.643717
		0.578783		0.642745
		0.57306		0.635863
		0.564606		0.634835
		0.564595		0.633673
		0.561033		0.632442
		0.557162		0.624843
		0.548181		0.622587
		0.54389		0.619913
		0.541723		0.61913
		0.541133		0.612679
		0.539096		0.610634
		0.531408		0.609503
		0.524362		0.609473
		0.494925		0.600101
		0.494691		0.596694
		0.470434		0.594251
		0.446418		0.592566
		0.426293		0.588689
		0.360082		0.586771
		0.348902		0.586442
		0.345734		0.585212
		0.327988		0.585077
		0.29369		0.580646
		0.292738		0.576381
		0.279658		0.57612
		0.274789		0.575898
		0.274391		0.575862
		0.266072		0.568173
		0.264058		0.567064
		0.253305		0.564756
		0.234337		0.564465
		0.227915		0.564113
		0.224376		0.559188
		0.218945		0.55732
		0.21729		0.556724
		0.212504		0.556216
		0.211831		0.556062
		0.208052		0.555127
		0.204705		0.552064
		0.20092		0.551959
		0.190883		0.551483
		0.190829		0.547973
		0.18908		0.546568
		0.186807		0.545672
		0.181974		0.542272
		0.177574		0.540104
		0.166982		0.539452
		0.165956		0.532904
		0.165915		0.520065
		0.164733		0.518422
		0.163438		0.517989
		0.160566		0.517043
		0.159488		0.511084
		0.158173		0.509723
		0.153831		0.506817
		0.149239		0.49746
		0.146834		0.496994
		0.142475		0.495247
		0.141184		0.494327
		0.139246		0.483035
		0.137358		0.476558
		0.13627		0.475723
		0.132697		0.475085
		0.128195		0.471532
		0.127145		0.456666
		0.125969		0.452958
		0.125396		0.450363
		0.12516		0.435932
		0.124089		0.433701
		0.123591		0.432842
		0.122065		0.427473
		0.118188		0.426917
		0.114857		0.424628
		0.114788		0.409563
		0.11459		0.407342
		0.113292		0.405155
		0.111062		0.404917
		0.10926		0.400329
		0.107648		0.400169
		0.106855		0.399604
		0.105955		0.397698
		0.105121		0.386476
		0.103733		0.380664
		0.10361		0.377411
		0.100647		0.376999
		0.100143		0.371321
		0.0988645		0.370733
		0.0902801		0.36291
		0.0880142		0.361691
		0.0875891		0.35724
		0.0839734		0.351656
		0.0817318		0.350748
		0.0814534		0.350174
		0.0801711		0.34301
		0.0789047		0.341306
		0.0784874		0.334265
		0.0784686		0.332946
		0.0762102		0.328285
		0.0753514		0.317848
		0.0743494		0.317553
		0.0730074		0.31482
		0.0725904		0.314121
		0.0724178		0.309705
		0.0686313		0.305916
		0.0675342		0.305009
		0.0670952		0.302587
		0.0644063		0.302031
		0.0641164		0.301207
		0.0615412		0.300441
		0.0601699		0.300123
		0.0593734		0.297611
		0.0558405		0.297435
		0.0523034		0.297271
		0.0494914		0.287268
		0.049042		0.286115
		0.0487055		0.285112
		0.0470193		0.284569
		0.0460027		0.284063
		0.0459019		0.280838
		0.0405526		0.280178
		0.038424		0.279166
		0.0359199		0.277946
		0.0359072		0.27784
		0.0355313		0.276442
		0.0349612		0.273987
		0.0324541		0.26794
		0.0284738		0.26685
		0.0239089		0.264687
		0.0239022		0.264113
		0.0229538		0.262132
		0.0215282		0.260745
		0.0203455		0.259874
		0.0173975		0.259443
		0.0149561		0.259388
		0.0140828		0.259187
		0.0139307		0.258695
		0.0131248		0.258159
		0.0114545		0.257742
		0.0100826		0.256079
		0.00797863		0.252606
		0.00540386		0.251322
		0.00522076		0.24957
		0.00356029		0.248789
		0.00315458		0.247655
		0.000633339		0.247554
		-0.00106488		0.247521
		-0.00505151		0.246609
		-0.00526902		0.244916
		-0.00753815		0.244744
		-0.00780005		0.243035
		-0.00887345		0.242731
		-0.0154033		0.240669
		-0.0156653		0.240499
		-0.0172425		0.238688
		-0.0174247		0.238571
		-0.0197626		0.238474
		-0.0238065		0.23845
		-0.0262692		0.233546
		-0.0279881		0.233161
		-0.028742		0.226748
		-0.0296294		0.226638
		-0.0325699		0.22578
		-0.0352335		0.224191
		-0.037089		0.219196
		-0.0388754		0.218924
		-0.0394565		0.217837
		-0.0433234		0.215969
		-0.0456473		0.215665
		-0.0456682		0.215353
		-0.0463527		0.215246
		-0.0526505		0.215076
		-0.0528527		0.21445
		-0.0533113		0.214223
		-0.0537748		0.21277
		-0.0590692		0.212534
		-0.0599128		0.21076
		-0.0657902		0.210121
		-0.0696275		0.209715
		-0.0708988		0.208678
		-0.0710266		0.206603
		-0.071287		0.205659
		-0.0743691		0.20482
		-0.0745119		0.204278
		-0.0759841		0.204088
		-0.0902023		0.203577
		-0.0908604		0.203165
		-0.0917863		0.20207
		-0.0924177		0.202002
		-0.0925895		0.201564
		-0.092675		0.201273
		-0.0980766		0.19818
		-0.098609		0.198062
		-0.0990205		0.197934
		-0.0994515		0.197815
		-0.0996537		0.195234
		-0.101508		0.193963
		-0.101845		0.193933
		-0.104868		0.19329
		-0.114072		0.191077
		-0.114386		0.18951
		-0.11475		0.18923
		-0.115274		0.187839
		-0.11776		0.185205
		-0.119082		0.184939
		-0.119343		0.184031
		-0.119987		0.183767
		-0.122678		0.182042
		-0.122885		0.181575
		-0.12648		0.181357
		-0.127649		0.179038
		-0.133034		0.178957
		-0.134566		0.178792
		-0.135329		0.178417
		-0.136281		0.175911
		-0.136986		0.175842
		-0.137547		0.173821
		-0.142609		0.173389
		-0.144759		0.172431
		-0.149162		0.171557
		-0.150149		0.171278
		-0.150202		0.170982
		-0.15087		0.170913
		-0.151004		0.169954
		-0.152072		0.169022
		-0.15941		0.168519
		-0.16069		0.168411
		-0.162765		0.167159
		-0.163298		0.166906
		-0.163961		0.165436
		-0.168911		0.165091
		-0.171191		0.163265
		-0.172617		0.163008
		-0.174609		0.162546
		-0.175333		0.1621
		-0.179584		0.161592
		-0.18331		0.161127
		-0.186536		0.160031
		-0.187271		0.159395
		-0.193998		0.159091
		-0.197141		0.159032
		-0.197286		0.158926
		-0.199102		0.158685
		-0.200243		0.158382
		-0.200907		0.158059
		-0.205574		0.157247
		-0.208589		0.156869
		-0.208923		0.156455
		-0.211857		0.156442
		-0.211956		0.156143
		-0.216009		0.156039
		-0.216337		0.153766
		-0.219504		0.153177
		-0.221048		0.151046
		-0.222609		0.150395
		-0.223054		0.150106
		-0.224191		0.14985
		-0.22557		0.149238
		-0.226333		0.146868
		-0.226738		0.146616
		-0.231666		0.144037
		-0.233987		0.142211
		-0.234406		0.142093
		-0.238041		0.140031
		-0.240271		0.139964
		-0.243442		0.139853
		-0.247374		0.139435
		-0.249215		0.139265
		-0.251675		0.138884
		-0.252568		0.13882
		-0.254398		0.138515
		-0.255146		0.138139
		-0.258336		0.138002
		-0.264186		0.137823
		-0.265928		0.13749
		-0.265941		0.137489
		-0.271366		0.135561
		-0.280153		0.134899
		-0.280444		0.133851
		-0.281417		0.133392
		-0.285494		0.133192
		-0.285625		0.132935
		-0.28869		0.132512
		-0.292611		0.132158
		-0.293951		0.132043
		-0.29505		0.131008
		-0.298885		0.130949
		-0.301557		0.130743
		-0.30371		0.130623
		-0.305613		0.129403
		-0.311254		0.129187
		-0.313019		0.127775
		-0.317423		0.127581
		-0.322804		0.126965
		-0.324325		0.126101
		-0.326353		0.125122
		-0.32712		0.124938
		-0.331879		0.123404
		-0.341364		0.1231
		-0.346417		0.122913
		-0.349758		0.122212
		-0.351945		0.12206
		-0.353344		0.120661
		-0.354327		0.11996
		-0.359331		0.119914
		-0.361885		0.119708
		-0.369632		0.119687
		-0.369639		0.119595
		-0.388232		0.119133
		-0.396869		0.118868
		-0.397738		0.118838
		-0.398414		0.118551
		-0.406961		0.117899
		-0.425909		0.117715
		-0.429519		0.117687
		-0.432244		0.117031
		-0.43705		0.116838
		-0.438561		0.116631
		-0.439473		0.116373
		-0.44095		0.116198
		-0.443095		0.116195
		-0.445482		0.116053
		-0.460937		0.115876
		-0.47723		0.115803
		-0.477573		0.115677
		-0.483179		0.11563
		-0.494953		0.114759
		-0.499974		0.114159
		-0.506191		0.11368
		-0.513865		0.113115
		-0.516601		0.112858
		-0.529526		0.112232
		-0.534368		0.112161
		-0.534809		0.111786
		-0.53575		0.109224
		-0.580176		0.108937
		-0.584955		0.108487
		-0.628722		0.10846
		-0.637055		0.106801
		-0.637668		0.106555
		-0.644868		0.106552
		-0.68476		0.105962
		-0.703441		0.105904
		-0.710322		0.105764
		-0.74018		0.10568
		-0.761305		0.105479
		-0.796359		0.104825
		-0.806546		0.103696
		-0.809856		0.103517
		-0.818488		0.103427
		-0.82682		0.102827
		-0.852784		0.101974
		-0.898067		0.101852
		-0.956963		0.10141
		-0.959508		0.101344
		-1.06102		0.101015
		-1.06913		0.100897
		-1.18171		0.100552
		-1.35355		0.099449
		-1.47124		0.0993772
		-1.47558		0.0990984
		-1.57828		0.0984836
		-1.60182		0.098281
		-1.62185		0.097967
		-1.69566		0.0973884
		-2.27559		0.0972062
		-2.63299		0.0971474
		-2.93277		0.0969751
		-3.13595		0.0967313
		-4.76602		0.0955906
		-5.44879		0.0950366
				0.0944275
				0.0940595
				0.0937835
				0.0937647
				0.0933688
				0.09332
				0.0922262
				0.0918325
				0.09179
				0.0916529
				0.0915493
				0.090857
				0.0904183
				0.0901426
				0.0895892
				0.0893206
				0.0890485
				0.0890477
				0.0889132
				0.0886195
				0.0884903
				0.0881907
				0.0879998
				0.0877639
				0.0875405
				0.0870699
				0.0866788
				0.0865075
				0.0863101
				0.0862542
				0.0862032
				0.0861668
				0.0859987
				0.0853409
				0.0850193
				0.0849163
				0.0848563
				0.0846968
				0.0846833
				0.0846256
				0.0836809
				0.0833187
				0.0832102
				0.0830411
				0.0828675
				0.0824312
				0.0821274
				0.0819985
				0.0813803
				0.0813388
				0.0807645
				0.0802036
				0.0799512
				0.0798618
				0.0789324
				0.0784589
				0.0782097
				0.0782072
				0.0779554
				0.0759533
				0.0756699
				0.0745585
				0.0745529
				0.0744712
				0.0744012
				0.0743239
				0.0742403
				0.0740433
				0.0740102
				0.0739291
				0.0738319
				0.0737414
				0.0732084
				0.0731215
				0.0729661
				0.072302
				0.0721448
				0.0720577
				0.0716881
				0.071638
				0.0716184
				0.0715633
				0.0715526
				0.0713935
				0.0713873
				0.0710854
				0.0710298
				0.0709726
				0.070514
				0.0697118
				0.0691279
				0.0684196
				0.0679712
				0.0675595
				0.0672382
				0.0672102
				0.0670024
				0.0663804
				0.0662245
				0.0661456
				0.0661332
				0.0651006
				0.064994
				0.0646423
				0.0644765
				0.0643503
				0.0641434
				0.0640581
				0.0634562
				0.0633194
				0.0633024
				0.0629212
				0.0628897
				0.0628285
				0.0624612
				0.0620635
				0.0619144
				0.0615435
				0.0611386
				0.0610966
				0.0610164
				0.0608891
				0.0608094
				0.060614
				0.0603964
				0.0603395
				0.060051
				0.0599472
				0.0598306
				0.0595808
				0.0588897
				0.0584501
				0.0582813
				0.0581715
				0.0578821
				0.0578498
				0.0575
				0.0572572
				0.0571596
				0.0566243
				0.0565532
				0.0560399
				0.0557565
				0.0554953
				0.0551685
				0.0548982
				0.0548845
				0.0548566
				0.0548491
				0.0547504
				0.0544941
				0.0540744
				0.0535929
				0.0534397
				0.053413
				0.0532015
				0.0529243
				0.0525689
				0.0525407
				0.0523307
				0.0521832
				0.0520174
				0.0519653
				0.0518283
				0.0510726
				0.0510374
				0.0506119
				0.0504223
				0.0501967
				0.0501209
				0.0500374
				0.0499617
				0.0499326
				0.0499227
				0.0498579
				0.0497515
				0.0495736
				0.0493237
				0.0490716
				0.0490117
				0.0484342
				0.0481212
				0.0476055
				0.0473252
				0.0473007
				0.0471312
				0.0470017
				0.0467956
				0.0466007
				0.0462983
				0.0459199
				0.0453824
				0.0453351
				0.0451568
				0.0446267
				0.0443385
				0.0440227
				0.0435342
				0.0433766
				0.0432525
				0.0432376
				0.0431787
				0.0431566
				0.0430848
				0.0427012
				0.0423664
				0.0423437
				0.0421925
				0.0419682
				0.0409749
				0.0408911
				0.0407853
				0.0406899
				0.0401736
				0.0400722
				0.0400532
				0.0395935
				0.0391985
				0.0391924
				0.0390652
				0.0388611
				0.0383362
				0.0375851
				0.0374954
				0.0373621
				0.0373081
				0.037106
				0.0366185
				0.0363015
				0.0357402
				0.0353082
				0.0351091
				0.0350658
				0.0345714
				0.0344297
				0.0343709
				0.0337745
				0.03368
				0.0335479
				0.0335129
				0.033106
				0.0323896
				0.0322531
				0.0320085
				0.0319678
				0.0315679
				0.0307148
				0.0306863
				0.0305956
				0.0305206
				0.0305043
				0.0301169
				0.0300832
				0.0298786
				0.0297729
				0.0296729
				0.02899
				0.0286968
				0.0285618
				0.0284339
				0.0283825
				0.028343
				0.0283077
				0.0278571
				0.0268835
				0.0268114
				0.0266396
				0.0264833
				0.0263691
				0.0263585
				0.0263474
				0.0260257
				0.0259279
				0.025868
				0.0254849
				0.0249372
				0.0249348
				0.0246578
				0.0246237
				0.0245791
				0.024354
				0.0236337
				0.0235596
				0.0234179
				0.0232943
				0.0232363
				0.0231757
				0.0226901
				0.0226329
				0.0224609
				0.0219636
				0.0217475
				0.021508
				0.02132
				0.0213181
				0.0212913
				0.0208626
				0.0206829
				0.0204397
				0.0199697
				0.0199596
				0.0198016
				0.0193503
				0.018689
				0.018656
				0.0185522
				0.018182
				0.0179529
				0.0178085
				0.017764
				0.0176679
				0.0173335
				0.0171565
				0.0170089
				0.0168492
				0.0167067
				0.0165818
				0.0162207
				0.0160962
				0.0160917
				0.0160021
				0.0151409
				0.0149716
				0.0149061
				0.0148915
				0.0146872
				0.0146841
				0.0145465
				0.0144402
				0.0144239
				0.0144111
				0.0140337
				0.0137079
				0.0135353
				0.0135166
				0.013453
				0.0132121
				0.0131395
				0.0129372
				0.0127786
				0.0125917
				0.0124327
				0.0123821
				0.0122974
				0.0122959
				0.0121998
				0.0119315
				0.0116092
				0.0115676
				0.0115096
				0.0115055
				0.0112778
				0.0108105
				0.0104203
				0.0103816
				0.00985445
				0.00982533
				0.00954148
				0.0093502
				0.00914412
				0.00796003
				0.00768781
				0.00719509
				0.0071213
				0.00706876
				0.00668526
				0.0061022
				0.0060804
				0.00583571
				0.00570294
				0.00562084
				0.0056151
				0.00550183
				0.00484521
				0.00473559
				0.00431565
				0.00430995
				0.00417983
				0.00417665
				0.00413456
				0.00398085
				0.00367899
				0.0034866
				0.00346217
				0.003431
				0.00295951
				0.00290702
				0.00267209
				0.00259609
				0.0025498
				0.00227998
				0.0021505
				0.00199359
				0.0018154
				0.00180443
				0.0016866
				0.00163911
				0.00150405
				0.0014733
				0.00143466
				0.0013112
				0.00120094
				0.00115034
				0.00109382
				0.00100711
				0.000956574
				8.43568e-05
				-0.00102432
				-0.00160894
				-0.00167357
				-0.00214804
				-0.00243293
				-0.00268677
				-0.00271123
				-0.00281132
				-0.00281555
				-0.00306398
				-0.00322413
				-0.00334318
				-0.0037544
				-0.00396534
				-0.00398753
				-0.00409416
				-0.00436746
				-0.00437959
				-0.0045737
				-0.00458665
				-0.00474013
				-0.00502788
				-0.00520431
				-0.00560289
				-0.00572998
				-0.005813
				-0.00593032
				-0.00608238
				-0.00621253
				-0.00670484
				-0.00685106
				-0.00697467
				-0.00706011
				-0.00718302
				-0.00768872
				-0.00838222
				-0.00840347
				-0.00841957
				-0.00863809
				-0.00920959
				-0.00922916
				-0.00935546
				-0.00937997
				-0.00944976
				-0.00948073
				-0.00955276
				-0.00969778
				-0.0101705
				-0.0106321
				-0.0108745
				-0.0111408
				-0.0111627
				-0.0113724
				-0.0116226
				-0.0116938
				-0.0116943
				-0.012038
				-0.0122576
				-0.0126044
				-0.0131277
				-0.0131322
				-0.0133674
				-0.0141745
				-0.0142006
				-0.0148453
				-0.0151831
				-0.0157035
				-0.0160996
				-0.0166621
				-0.0167873
				-0.0170474
				-0.0170962
				-0.0171732
				-0.0172181
				-0.0173215
				-0.0177063
				-0.0177655
				-0.017896
				-0.0179424
				-0.0183517
				-0.0183744
				-0.0187702
				-0.0188327
				-0.0193441
				-0.0194719
				-0.0195203
				-0.0197307
				-0.0199308
				-0.021259
				-0.0213051
				-0.0219307
				-0.02194
				-0.0224273
				-0.0227393
				-0.0229373
				-0.0234855
				-0.0238492
				-0.0244553
				-0.0245178
				-0.0245534
				-0.0247803
				-0.0248128
				-0.0248454
				-0.0249416
				-0.0249731
				-0.0254254
				-0.025445
				-0.025526
				-0.0255447
				-0.0256257
				-0.0257454
				-0.0270448
				-0.0273649
				-0.0273869
				-0.0274192
				-0.0279524
				-0.0281999
				-0.0282173
				-0.0284506
				-0.0296687
				-0.0299016
				-0.0303349
				-0.0305239
				-0.0305904
				-0.0305905
				-0.0306317
				-0.0309436
				-0.0310086
				-0.0312508
				-0.0312981
				-0.0315056
				-0.0318079
				-0.031883
				-0.0320223
				-0.0324157
				-0.0329195
				-0.0330228
				-0.033447
				-0.0336141
				-0.0339219
				-0.03421
				-0.0342312
				-0.0353081
				-0.0356037
				-0.0359492
				-0.03615
				-0.0361678
				-0.0365173
				-0.0366193
				-0.0368073
				-0.0371136
				-0.0373791
				-0.0382233
				-0.0383081
				-0.0383546
				-0.0386776
				-0.0391726
				-0.0392857
				-0.0393005
				-0.0401083
				-0.0406516
				-0.0412145
				-0.041796
				-0.0418439
				-0.0418771
				-0.0421189
				-0.0422825
				-0.0428592
				-0.0439355
				-0.0444976
				-0.044562
				-0.0447444
				-0.0451911
				-0.0451923
				-0.0453321
				-0.0456928
				-0.0457325
				-0.0461108
				-0.0461851
				-0.0465016
				-0.0466448
				-0.0471684
				-0.0472947
				-0.0473036
				-0.0482186
				-0.0491597
				-0.0492757
				-0.0495109
				-0.0497561
				-0.0498349
				-0.0499185
				-0.050042
				-0.0506539
				-0.0507572
				-0.0508502
				-0.050879
[truncated: 1,226 more rows]
