# Supplementary material for: Tight bending of the Ndc80 complex provides intrinsic regulation of its binding to microtubules
Source: eLife. 2019 May 2;8:e44489. doi: 10.7554/eLife.44489 (PMC6516834; doi:10.7554/eLife.44489)
Supplement: Figure 5—source data 1. [file elife-44489-fig5-data1.xlsx]

## Sheet: Sheet1
Figure 5-source data 1	2 days, 3 slides	3 days, 3 slides	2 days, 3 slides
corrected FRET values within histograms	Ndc80	Ndc80 on MTs	Ndc80+MIND
	1.1681	2.797	0.654647
	1.1266	0.996834	0.612751
	1.11795	0.982462	0.574305
	1.11671	0.952985	0.552327
	1.10166	0.873599	0.546738
	1.07816	0.866993	0.53006
	1.0755	0.852653	0.525114
	1.0691	0.850253	0.463707
	1.06809	0.839276	0.453076
	1.06687	0.835695	0.445514
	1.06496	0.832424	0.43669
	1.05791	0.83119	0.418891
	1.05675	0.82796	0.418307
	1.05609	0.800257	0.41701
	1.05563	0.799296	0.413983
	1.05224	0.798913	0.402968
	1.05093	0.798168	0.400546
	1.04592	0.797724	0.39794
	1.04379	0.793549	0.397532
	1.03625	0.783838	0.390482
	1.03536	0.77756	0.390092
	1.03317	0.775903	0.387386
	1.03245	0.770503	0.38553
	1.03064	0.769768	0.385342
	1.02884	0.768859	0.371484
	1.02871	0.768458	0.342311
	1.02585	0.768441	0.340225
	1.02427	0.767085	0.334729
	1.01932	0.765123	0.332569
	1.01824	0.759794	0.33019
	1.01647	0.75873	0.32238
	1.0132	0.753426	0.320732
	1.00906	0.752	0.310963
	1.00892	0.746838	0.307248
	1.00854	0.743826	0.304144
	1.00752	0.742351	0.300672
	1.0066	0.738546	0.300202
	1.00631	0.733621	0.298029
	1.0029	0.733339	0.296864
	1.00245	0.726287	0.296227
	0.999136	0.722211	0.287487
	0.997579	0.721758	0.271674
	0.992406	0.718137	0.271112
	0.992114	0.71531	0.269012
	0.990875	0.715026	0.268759
	0.990359	0.713179	0.264038
	0.989659	0.709276	0.261849
	0.988756	0.708174	0.259159
	0.988296	0.707929	0.258649
	0.988144	0.705806	0.258298
	0.986805	0.700994	0.254677
	0.986011	0.683139	0.252196
	0.98556	0.664076	0.248643
	0.983453	0.649502	0.239998
	0.981241	0.643407	0.236991
	0.981133	0.639619	0.235058
	0.980682	0.637475	0.235
	0.980532	0.636971	0.234215
	0.97843	0.631274	0.229834
	0.975761	0.611834	0.229263
	0.974771	0.610023	0.22688
	0.974223	0.601559	0.225007
	0.973651	0.594446	0.224225
	0.971861	0.58768	0.222049
	0.969245	0.573804	0.221907
	0.969084	0.55129	0.218459
	0.966128	0.538416	0.216863
	0.964905	0.521327	0.215728
	0.964168	0.516781	0.215064
	0.963142	0.503998	0.214025
	0.957682	0.488018	0.207269
	0.957414	0.482721	0.205712
	0.956532	0.480853	0.205194
	0.955807	0.471224	0.201243
	0.955067	0.466112	0.200464
	0.95399	0.465273	0.200227
	0.952722	0.460146	0.199468
	0.950265	0.45714	0.196421
	0.949156	0.442772	0.183707
	0.948573	0.427106	0.181282
	0.947774	0.424568	0.181027
	0.946814	0.422545	0.179133
	0.945164	0.419118	0.178895
	0.943321	0.417114	0.177005
	0.943089	0.407226	0.175075
	0.941562	0.400898	0.167208
	0.939346	0.38113	0.166374
	0.939081	0.374317	0.16613
	0.937867	0.368837	0.166107
	0.937655	0.365337	0.165611
	0.937635	0.350087	0.164741
	0.93395	0.345253	0.163515
	0.933142	0.34205	0.163342
	0.932212	0.341461	0.163003
	0.931381	0.332661	0.162713
	0.928463	0.33189	0.16141
	0.926658	0.326424	0.160116
	0.92022	0.324596	0.159086
	0.916829	0.31955	0.156916
	0.916518	0.318851	0.156289
	0.915683	0.316201	0.15602
	0.914009	0.312949	0.156014
	0.909064	0.308229	0.154378
	0.907867	0.304882	0.154033
	0.904025	0.302281	0.153676
	0.899606	0.297509	0.153393
	0.891849	0.294722	0.15339
	0.890427	0.29291	0.151006
	0.887555	0.289941	0.150648
	0.887474	0.287989	0.148463
	0.880456	0.285435	0.148298
	0.88019	0.278953	0.148031
	0.879948	0.275063	0.145475
	0.875734	0.274785	0.145349
	0.873419	0.274448	0.142761
	0.868645	0.274344	0.142536
	0.864225	0.273927	0.141605
	0.861959	0.273651	0.141278
	0.854459	0.273183	0.140408
	0.853328	0.272935	0.140202
	0.846734	0.272574	0.139568
	0.843939	0.269725	0.138208
	0.837166	0.269559	0.137977
	0.835845	0.269366	0.137085
	0.833514	0.265615	0.133103
	0.829439	0.26443	0.13146
	0.829031	0.263884	0.129279
	0.824055	0.26205	0.128863
	0.821856	0.261041	0.125789
	0.818426	0.260548	0.125732
	0.813281	0.258151	0.125732
	0.81195	0.25742	0.125374
	0.811143	0.249801	0.123551
	0.809942	0.248413	0.123419
	0.807867	0.245606	0.121521
	0.804377	0.239216	0.120388
	0.80104	0.23846	0.120149
	0.800986	0.238044	0.119015
	0.794811	0.237833	0.118863
	0.793365	0.236008	0.118333
	0.787026	0.235623	0.117852
	0.785744	0.234529	0.116463
	0.783865	0.234322	0.116169
	0.780836	0.234203	0.115081
	0.780257	0.230105	0.114479
	0.778513	0.227835	0.112741
	0.777117	0.22774	0.110997
	0.772204	0.225425	0.110749
	0.771477	0.225073	0.110487
	0.769637	0.224188	0.10996
	0.769221	0.220285	0.109188
	0.768264	0.217935	0.108078
	0.768249	0.217591	0.107972
	0.76409	0.216947	0.106565
	0.763604	0.215171	0.103189
	0.762355	0.212871	0.102958
	0.759952	0.212026	0.102793
	0.759234	0.211612	0.101983
	0.758942	0.211122	0.0990118
	0.757667	0.209999	0.0978663
	0.75587	0.207217	0.0969347
	0.753616	0.20609	0.0965788
	0.753077	0.204368	0.0965762
	0.750128	0.203193	0.0954467
	0.748558	0.197621	0.0951759
	0.74599	0.195194	0.0931718
	0.743405	0.193733	0.0922842
	0.743048	0.193497	0.0919476
	0.741137	0.192526	0.091683
	0.740211	0.191994	0.0916378
	0.739945	0.190871	0.0913152
	0.739055	0.19078	0.0903208
	0.738624	0.189345	0.0895663
	0.737363	0.189106	0.0893862
	0.737128	0.186048	0.0881836
	0.736865	0.185215	0.0876753
	0.731799	0.18495	0.0876095
	0.731648	0.183282	0.087508
	0.728603	0.182415	0.0867412
	0.72858	0.182124	0.0865873
	0.727392	0.181893	0.0863882
	0.726734	0.181258	0.0861108
	0.726472	0.180773	0.084834
	0.725303	0.180262	0.0842689
	0.720691	0.178307	0.0820609
	0.720341	0.17755	0.0812313
	0.720097	0.17621	0.0798831
	0.720067	0.175929	0.0778666
	0.718894	0.172481	0.0762421
	0.717003	0.172117	0.0753298
	0.711636	0.170952	0.0752852
	0.711582	0.169844	0.0741799
	0.7106	0.169405	0.07355
	0.706325	0.169335	0.0722929
	0.704178	0.168997	0.0713724
	0.703652	0.168533	0.0688943
	0.702266	0.167444	0.0687092
	0.701049	0.167435	0.0675068
	0.698602	0.167108	0.0674432
	0.698153	0.165822	0.0671684
	0.695572	0.165375	0.06715
	0.693825	0.164983	0.066603
	0.693254	0.164583	0.0662671
	0.692581	0.164546	0.065729
	0.690999	0.164035	0.0655547
	0.686647	0.163319	0.0654777
	0.685824	0.162877	0.0643185
	0.685199	0.16254	0.0637488
	0.682202	0.162285	0.0636625
	0.681446	0.162162	0.0634533
	0.680074	0.162069	0.0632768
	0.679457	0.162019	0.062868
	0.677272	0.161911	0.0606326
	0.671965	0.160395	0.0590554
	0.670426	0.159394	0.0590025
	0.669633	0.159121	0.0571372
	0.66842	0.157845	0.057052
	0.667553	0.157399	0.0552587
	0.664033	0.153212	0.0545347
	0.660579	0.153143	0.0540235
	0.660099	0.153	0.0538694
	0.659799	0.152914	0.0537852
	0.658484	0.148646	0.0531351
	0.658193	0.147104	0.0530644
	0.655578	0.146868	0.0521154
	0.654484	0.145763	0.0520644
	0.653735	0.14469	0.0520144
	0.650879	0.143068	0.051988
	0.650452	0.142894	0.0498189
	0.64653	0.142773	0.0481433
	0.64632	0.142052	0.0479031
	0.645264	0.141397	0.0468764
	0.643053	0.141031	0.0465727
	0.64159	0.139918	0.0460488
	0.641216	0.139411	0.0445643
	0.640231	0.139049	0.0444951
	0.638219	0.137909	0.0440751
	0.637729	0.137685	0.0438214
	0.63764	0.137534	0.0436912
	0.637405	0.136246	0.0429014
	0.637054	0.136186	0.0427581
	0.635699	0.135361	0.0426409
	0.634424	0.135226	0.0416907
	0.631573	0.135178	0.0413395
	0.631426	0.134698	0.0410971
	0.631014	0.134333	0.0399876
	0.63045	0.133092	0.0396401
	0.629525	0.132533	0.0374453
	0.628827	0.131981	0.0365301
	0.627738	0.131491	0.036523
	0.626161	0.131088	0.0360639
	0.625457	0.130934	0.0353583
	0.625282	0.13044	0.0342821
	0.624277	0.130032	0.0340959
	0.624033	0.129858	0.0340502
	0.623439	0.129694	0.0332962
	0.623372	0.129683	0.031842
	0.6191	0.129337	0.0317073
	0.617745	0.128837	0.0311137
	0.617257	0.127103	0.0308989
	0.615236	0.126321	0.0308399
	0.614998	0.125777	0.0303341
	0.612698	0.123794	0.0302916
	0.609308	0.123751	0.029556
	0.602956	0.122741	0.0286274
	0.602177	0.122129	0.0285712
	0.600937	0.122061	0.0279947
	0.600804	0.122043	0.0277077
	0.600087	0.121286	0.0269193
	0.599632	0.119367	0.0255646
	0.597232	0.118579	0.0242129
	0.59136	0.118464	0.0229111
	0.586905	0.118355	0.0225299
	0.585825	0.118237	0.0214342
	0.581992	0.116424	0.021326
	0.581901	0.116246	0.021172
	0.581078	0.115756	0.0211081
	0.580436	0.113984	0.0210987
	0.580167	0.113329	0.0210672
	0.579753	0.113076	0.0210305
	0.579422	0.113012	0.0210112
	0.578783	0.112699	0.0202269
	0.577166	0.11115	0.0199081
	0.57583	0.110803	0.0192439
	0.57306	0.110445	0.0186204
	0.571586	0.110242	0.0183392
	0.570607	0.109924	0.0169412
	0.570572	0.109842	0.0165202
	0.570247	0.109638	0.0164857
	0.569146	0.108753	0.016419
	0.568379	0.10818	0.013275
	0.566698	0.108044	0.0126841
	0.564606	0.107485	0.0124459
	0.564595	0.107431	0.0114267
	0.564168	0.107278	0.011044
	0.561628	0.106853	0.0109843
	0.561033	0.105589	0.0103014
	0.559286	0.105159	0.00930099
	0.558543	0.104802	0.00928163
	0.558351	0.104653	0.0081769
	0.557444	0.103763	0.00791087
	0.557162	0.1035	0.00559096
	0.556402	0.102184	0.00539532
	0.553861	0.102085	0.00529902
	0.553194	0.101692	0.00527293
	0.553083	0.101282	0.00361053
	0.552709	0.101195	0.00327751
	0.552603	0.100791	0.00265789
	0.551872	0.100773	0.00189397
	0.551289	0.100765	0.00164217
	0.549598	0.100491	-0.000105476
	0.548181	0.100087	-0.000344866
	0.548071	0.0973568	-0.000421861
	0.54389	0.0972856	-0.000824138
	0.541723	0.0966213	-0.00100323
	0.541133	0.0964855	-0.00130943
	0.540308	0.0955708	-0.00149044
	0.539166	0.095555	-0.00150239
	0.539096	0.0954768	-0.00252123
	0.538995	0.0950168	-0.00254635
	0.537797	0.0943671	-0.00287689
	0.537144	0.0938825	-0.00308733
	0.536687	0.0930695	-0.00346403
	0.534797	0.0928876	-0.00435787
	0.534373	0.092053	-0.00537346
	0.533805	0.0914558	-0.0054231
	0.533669	0.0914301	-0.00564762
	0.532884	0.0913762	-0.0057079
	0.532748	0.0913063	-0.00636746
	0.532275	0.0911244	-0.00660484
	0.531646	0.0910545	-0.00764863
	0.531408	0.0901498	-0.00832977
	0.530459	0.0897598	-0.00889526
	0.529485	0.0887774	-0.00908361
	0.529369	0.088478	-0.00917028
	0.52908	0.0884585	-0.0109266
	0.528717	0.0879548	-0.0112321
	0.527901	0.0878209	-0.0123019
	0.527282	0.0872662	-0.0123611
	0.525222	0.0869233	-0.0129098
	0.524362	0.0866682	-0.0134606
	0.524146	0.0863636	-0.0138106
	0.523027	0.0861476	-0.0144166
	0.521609	0.0860808	-0.014565
	0.518887	0.0852076	-0.0168982
	0.518593	0.0846777	-0.0181896
	0.518403	0.0844541	-0.0186155
	0.514593	0.0842902	-0.0190179
	0.513047	0.0840646	-0.019227
	0.512813	0.0828891	-0.0192801
	0.512298	0.0827898	-0.0195195
	0.51019	0.0827382	-0.0201621
	0.505261	0.0827071	-0.0209433
	0.504547	0.0820903	-0.0211132
	0.503525	0.0813768	-0.021201
	0.502544	0.0813413	-0.0230964
	0.498179	0.0810028	-0.0232855
	0.497652	0.080623	-0.023833
	0.496131	0.0806186	-0.0245689
	0.495608	0.0802124	-0.0249199
	0.494925	0.0799949	-0.0255545
	0.494691	0.0796954	-0.0261182
	0.493376	0.0785275	-0.0270423
	0.493133	0.0784453	-0.0270682
	0.492421	0.0782276	-0.0272116
	0.490847	0.0776035	-0.0279262
	0.490502	0.0775166	-0.0287136
	0.489908	0.0764847	-0.0293574
	0.487954	0.0749224	-0.0302284
	0.48778	0.0732056	-0.0306914
	0.486966	0.0731675	-0.0312692
	0.486328	0.0728027	-0.0319754
	0.485688	0.0724239	-0.033069
	0.48209	0.0720479	-0.0330739
	0.47994	0.0715017	-0.0339386
	0.479844	0.0713602	-0.0354764
	0.479141	0.0708849	-0.0359976
	0.478952	0.070159	-0.0363112
	0.476797	0.0700978	-0.0365048
	0.475732	0.069645	-0.0366788
	0.475047	0.0695421	-0.0372597
	0.472786	0.0693921	-0.0380343
	0.470434	0.0693689	-0.0380947
	0.470062	0.0690025	-0.0386713
	0.469827	0.0689481	-0.0388111
	0.468986	0.0679087	-0.0389278
	0.465676	0.0675463	-0.039649
	0.464944	0.0672572	-0.0398907
	0.462046	0.0667333	-0.040248
	0.460552	0.0664006	-0.0402876
	0.459929	0.0661893	-0.0407854
	0.457485	0.066119	-0.0411503
	0.45541	0.0659436	-0.0412223
	0.454217	0.0656773	-0.0414027
	0.453694	0.0656426	-0.0433397
	0.4536	0.0652206	-0.0440142
	0.446418	0.064962	-0.0443688
	0.445063	0.0648893	-0.045153
	0.443462	0.0641652	-0.0451908
	0.439469	0.0640812	-0.0461025
	0.437461	0.0635815	-0.0466348
	0.437169	0.0627543	-0.0466707
	0.436728	0.0625062	-0.0469745
	0.434828	0.0620467	-0.0477586
	0.43311	0.0609952	-0.0483808
	0.431452	0.0609669	-0.0494069
	0.428424	0.0605971	-0.0526035
	0.428382	0.0597447	-0.053897
	0.427842	0.0580263	-0.0539463
	0.426999	0.0572508	-0.0540738
	0.426293	0.0570212	-0.0547824
	0.421353	0.0570149	-0.054979
	0.41496	0.0569371	-0.0552178
	0.414159	0.0568323	-0.0554995
	0.413496	0.0565965	-0.0557609
	0.413453	0.0561741	-0.0559843
	0.409116	0.0560419	-0.0561498
	0.407954	0.055844	-0.0568581
	0.405975	0.05562	-0.0570075
	0.405355	0.0538667	-0.0574584
	0.404973	0.0533221	-0.0576557
	0.404329	0.052987	-0.0578071
	0.404187	0.0529241	-0.057946
	0.402687	0.0522281	-0.0579971
	0.402632	0.0522209	-0.0590212
	0.401125	0.0520028	-0.0593871
	0.398569	0.0518893	-0.0604588
	0.398564	0.051657	-0.0609454
	0.398401	0.0514997	-0.0611209
	0.397764	0.0513728	-0.0618166
	0.397666	0.0512302	-0.0633475
	0.397562	0.051025	-0.0638056
	0.396404	0.0506821	-0.06521
	0.394551	0.0497909	-0.0657129
	0.393807	0.0494732	-0.066363
	0.393218	0.0494327	-0.0670695
	0.392394	0.0491112	-0.0670894
	0.392326	0.0488739	-0.0680683
	0.390715	0.0487779	-0.0696581
	0.389473	0.0486858	-0.0701359
	0.389059	0.0484491	-0.0704319
	0.388423	0.0484177	-0.0708182
	0.388181	0.0483111	-0.0708789
	0.3827	0.0471781	-0.0715661
	0.380492	0.0471735	-0.0723072
	0.378576	0.0470116	-0.073311
	0.376595	0.0467215	-0.0736204
	0.37293	0.0467006	-0.0740932
	0.372474	0.046649	-0.074234
	0.370092	0.0465224	-0.0745467
	0.369217	0.04616	-0.075709
	0.368404	0.0458628	-0.0758699
	0.364335	0.0458275	-0.0759621
	0.364262	0.0456784	-0.0761028
	0.363374	0.0456168	-0.0785422
	0.362924	0.0449478	-0.0803842
	0.362435	0.044933	-0.0804134
	0.361691	0.0448562	-0.0826302
	0.361536	0.0444097	-0.0829855
	0.361176	0.0443889	-0.0833047
	0.360082	0.0438975	-0.0843548
	0.357978	0.0434238	-0.0845016
	0.355671	0.0432092	-0.0845262
	0.35517	0.0431702	-0.0848431
	0.354831	0.0431283	-0.0855018
	0.352095	0.0430908	-0.0862811
	0.351466	0.0428244	-0.0863674
	0.351101	0.0423946	-0.0881948
	0.350998	0.0423064	-0.0896071
	0.350616	0.0414492	-0.0901174
	0.350022	0.0409485	-0.0908042
	0.348902	0.0409216	-0.0909682
	0.347981	0.0408156	-0.0912751
	0.346172	0.0401711	-0.0921446
	0.345734	0.0398026	-0.0923919
	0.345111	0.0397018	-0.0926268
	0.344041	0.03955	-0.0935597
	0.338621	0.0395495	-0.0947218
	0.338099	0.039354	-0.0960734
	0.337968	0.0390925	-0.0964437
	0.336634	0.0388415	-0.0979328
	0.336377	0.0380936	-0.0982685
	0.335209	0.0378869	-0.0983684
	0.332236	0.0378127	-0.0994033
	0.331704	0.0377234	-0.0996758
	0.330747	0.0375804	-0.100114
	0.330461	0.0371314	-0.100843
	0.33018	0.0370045	-0.102285
	0.329445	0.0368937	-0.102742
	0.328739	0.0367549	-0.104001
	0.327988	0.0367154	-0.104591
	0.32793	0.0366247	-0.104797
	0.324713	0.0365775	-0.105345
	0.323116	0.0365384	-0.105714
	0.320607	0.0363818	-0.106795
	0.32039	0.0360434	-0.107372
	0.320207	0.0358697	-0.109216
	0.320024	0.0358622	-0.11021
	0.319507	0.0357746	-0.112258
	0.319429	0.0353319	-0.112382
	0.318838	0.0350984	-0.112599
	0.318822	0.0349526	-0.114176
	0.314427	0.034944	-0.116871
	0.313832	0.0341386	-0.118935
	0.312785	0.0340027	-0.119214
	0.312205	0.0335188	-0.119815
	0.310218	0.0335061	-0.11993
	0.309432	0.0334617	-0.119973
	0.308165	0.0322396	-0.120347
	0.306408	0.0321682	-0.120542
	0.305512	0.0320525	-0.121155
	0.304992	0.0318226	-0.12246
	0.304012	0.0317217	-0.12266
	0.30331	0.0314669	-0.123305
	0.301429	0.0313282	-0.124612
	0.300877	0.031246	-0.125555
	0.300692	0.0311438	-0.126193
	0.299046	0.031043	-0.127061
	0.297453	0.0307775	-0.12716
	0.296012	0.0307304	-0.127237
	0.295975	0.0305222	-0.129737
	0.294598	0.0304939	-0.131228
	0.29386	0.0303723	-0.132383
	0.29372	0.030366	-0.132595
	0.29369	0.0301473	-0.132644
	0.293415	0.0298291	-0.132792
	0.293154	0.0290979	-0.135304
	0.292954	0.0288291	-0.135967
	0.292738	0.0286667	-0.137461
	0.291207	0.0282644	-0.138067
	0.290691	0.0278893	-0.138078
	0.290431	0.0277201	-0.142511
	0.287501	0.0276221	-0.144719
	0.285758	0.0274279	-0.145376
	0.285303	0.0269894	-0.145536
	0.284752	0.0265528	-0.146962
	0.284279	0.0265442	-0.147567
	0.282823	0.0263106	-0.14759
	0.282698	0.026102	-0.149003
	0.281751	0.0259887	-0.15163
	0.280685	0.0259779	-0.15397
	0.280064	0.0252815	-0.154514
	0.279658	0.0244322	-0.156437
	0.279008	0.0242552	-0.156564
	0.278691	0.0236809	-0.156654
	0.277891	0.0235817	-0.159171
	0.276746	0.0234329	-0.160544
	0.275638	0.0233996	-0.161232
	0.275539	0.0228214	-0.163556
	0.274958	0.0227091	-0.164254
	0.274789	0.021944	-0.165642
	0.274391	0.0215802	-0.166892
	0.272502	0.0212759	-0.168851
	0.268786	0.0209891	-0.169615
	0.268578	0.02002	-0.172568
	0.26838	0.0197616	-0.173064
	0.268282	0.0196979	-0.175216
	0.26827	0.0196401	-0.177037
	0.268166	0.0194551	-0.177114
	0.266986	0.0193958	-0.178518
	0.266072	0.0187214	-0.181885
	0.264058	0.0173335	-0.185295
	0.263871	0.0170814	-0.189323
	0.262157	0.0168566	-0.189414
	0.261345	0.0165281	-0.189689
	0.260356	0.016257	-0.191982
	0.257818	0.0156438	-0.192472
	0.257568	0.0151624	-0.193686
	0.257536	0.0148798	-0.195302
	0.257308	0.014683	-0.195992
	0.257218	0.0145441	-0.198264
	0.256588	0.0141613	-0.198384
	0.255976	0.0139269	-0.201691
	0.255902	0.0136495	-0.203254
	0.253305	0.0135204	-0.203554
	0.252652	0.0135115	-0.204272
	0.252085	0.0125916	-0.2047
	0.251711	0.0124954	-0.205343
	0.251218	0.0124855	-0.205662
	0.251074	0.012466	-0.206084
	0.250469	0.0124461	-0.207143
	0.250128	0.012427	-0.207272
	0.249463	0.0121945	-0.209625
	0.249328	0.0121109	-0.210044
	0.248615	0.0119725	-0.210128
	0.248329	0.0116421	-0.212057
	0.247033	0.0116082	-0.214453
	0.246968	0.0115928	-0.215425
	0.246171	0.0115666	-0.216522
	0.246027	0.0114653	-0.217854
	0.245637	0.0114353	-0.219149
	0.245545	0.0111105	-0.219483
	0.245327	0.0109298	-0.223749
	0.24495	0.0106338	-0.225648
	0.243651	0.0105433	-0.231846
	0.243018	0.0101683	-0.23268
	0.242217	0.0100173	-0.233
	0.241215	0.0100165	-0.236097
	0.240535	0.00946408	-0.236563
	0.238264	0.00933403	-0.23678
	0.237051	0.00920259	-0.237191
	0.236947	0.00909489	-0.237785
	0.236603	0.00859257	-0.238159
	0.236433	0.00809754	-0.24057
	0.236059	0.00791737	-0.241392
	0.235558	0.00784876	-0.243197
	0.235457	0.00752612	-0.244751
	0.234337	0.00750763	-0.246791
	0.234321	0.00740231	-0.247675
	0.234045	0.00739375	-0.251711
	0.233382	0.00661626	-0.251847
	0.233297	0.00661371	-0.2546
	0.2332	0.00649762	-0.265222
	0.232498	0.00634564	-0.266073
	0.232451	0.006293	-0.266489
	0.232447	0.00606822	-0.271265
	0.232194	0.00591408	-0.27132
	0.230598	0.0057491	-0.289069
	0.229975	0.00571748	-0.293684
	0.22854	0.0054846	-0.295609
	0.228512	0.0052858	-0.298371
	0.228491	0.00498759	-0.304224
	0.228136	0.00462905	-0.308414
	0.227915	0.00457785	-0.312428
	0.226937	0.00422009	-0.312593
	0.226397	0.0038026	-0.313873
	0.225793	0.00374334	-0.316831
	0.22552	0.00367589	-0.322839
	0.224376	0.00356527	-0.324618
	0.223326	0.00327407	-0.325391
	0.223132	0.00315221	-0.327857
	0.222868	0.00311672	-0.328588
	0.222623	0.00295404	-0.329271
	0.221528	0.00293414	-0.329691
	0.220948	0.00293123	-0.330093
	0.220825	0.00242141	-0.331067
	0.220448	0.00237129	-0.331558
	0.220335	0.00216247	-0.338539
	0.220181	0.00215637	-0.34051
	0.219949	0.00158846	-0.344622
	0.219444	0.000571352	-0.34601
	0.218945	0.000381598	-0.348645
	0.21729	0.000125063	-0.349733
	0.217191	-0.000314934	-0.350148
	0.217077	-0.000550907	-0.351726
	0.215984	-0.0010811	-0.372832
	0.215003	-0.00110424	-0.374401
	0.213847	-0.00121364	-0.374512
	0.213653	-0.00147551	-0.380602
	0.212504	-0.00192737	-0.385566
	0.211831	-0.00201119	-0.38614
	0.211732	-0.00234687	-0.38889
	0.210965	-0.00241492	-0.397035
	0.210317	-0.00246132	-0.402033
	0.210288	-0.0025143	-0.40221
	0.210197	-0.00272579	-0.402605
	0.208052	-0.00284861	-0.408137
	0.207683	-0.00299012	-0.418941
	0.207269	-0.0030487	-0.422705
	0.206476	-0.00327218	-0.431852
	0.205888	-0.00333769	-0.432975
	0.204906	-0.00335765	-0.444241
	0.204705	-0.00344927	-0.44853
	0.204528	-0.00347764	-0.450158
	0.204438	-0.00349217	-0.453218
	0.204396	-0.00358634	-0.490525
	0.204242	-0.00359441	-0.492908
	0.204204	-0.00364108	-0.499761
	0.204111	-0.00381729	-0.502888
	0.204098	-0.00412199	-0.517995
	0.203626	-0.00513075	-0.52664
	0.203355	-0.00651685	-0.526802
	0.20318	-0.00762474	-0.538538
	0.202207	-0.00798779	-0.547566
	0.202005	-0.00808526	-0.552531
	0.201879	-0.00833172	-0.553427
	0.201216	-0.00841799	-0.555306
	0.20111	-0.00842794	-0.568803
	0.20092	-0.00848111	-0.571551
	0.199805	-0.00868739	-0.573384
	0.199348	-0.00887363	-0.574879
	0.198776	-0.00899161	-0.583369
	0.198729	-0.00939937	-0.584149
	0.198702	-0.00965866	-0.588132
	0.198312	-0.00971121	-0.602614
	0.198131	-0.00991181	-0.610921
	0.198056	-0.0104341	-0.61547
	0.197777	-0.0108229	-0.615973
	0.197014	-0.0108747	-0.622885
	0.196246	-0.0108776	-0.627146
	0.195538	-0.0110976	-0.641489
	0.195466	-0.0112029	-0.6439
	0.19487	-0.011487	-0.645208
	0.194257	-0.011814	-0.659993
	0.194205	-0.0121331	-0.681303
	0.193523	-0.0122052	-0.685343
	0.193274	-0.013265	-0.690354
	0.192598	-0.0135793	-0.694386
	0.192572	-0.0137954	-0.731345
	0.192272	-0.0138036	-0.805951
	0.191703	-0.0142458	-0.814415
	0.191151	-0.0143027	-0.89959
	0.190883	-0.0144941	-0.938548
	0.190829	-0.014712	-0.962633
	0.190458	-0.015228	-0.982921
	0.190037	-0.01523	-0.987158
	0.189677	-0.0157706	-1.03984
	0.189437	-0.016008	-1.06322
	0.189154	-0.0163208	-1.17405
	0.18908	-0.0163292	-1.20695
	0.187971	-0.0163595	-1.22818
	0.187794	-0.0164042	-1.23067
	0.187171	-0.0165381	-1.67094
	0.186807	-0.0169831	-2.1609
	0.185421	-0.017095	-3.00555
	0.185297	-0.0172852	-4.3062
	0.184036	-0.0174708	-10.545
	0.183927	-0.0178416	-11.657
	0.183146	-0.0180115
	0.181974	-0.0183335
	0.180902	-0.0185919
	0.180773	-0.0187104
	0.180151	-0.018765
	0.18015	-0.0187673
	0.179934	-0.0190164
	0.179468	-0.01952
	0.179459	-0.0199721
	0.179091	-0.0208137
	0.17844	-0.020867
	0.178397	-0.0211519
	0.177887	-0.0217888
	0.177703	-0.0218008
	0.177574	-0.0218268
	0.177509	-0.0222088
	0.176954	-0.0223293
	0.176953	-0.0226342
	0.175876	-0.0228359
	0.175765	-0.0228835
	0.175026	-0.0233209
	0.174812	-0.0234108
	0.174268	-0.0237308
	0.17323	-0.0237589
	0.173022	-0.023799
	0.172875	-0.0239825
	0.172398	-0.0241024
	0.171896	-0.0243474
	0.17145	-0.0244258
	0.171363	-0.0246745
	0.171256	-0.0246779
	0.170337	-0.0252217
	0.169179	-0.0253264
	0.168431	-0.025568
	0.167668	-0.025846
	0.167667	-0.027576
	0.167171	-0.0276235
	0.166982	-0.027943
	0.165956	-0.0283779
	0.165944	-0.0285051
	0.165915	-0.0286432
	0.16571	-0.0287972
	0.165481	-0.0289617
	0.165027	-0.0292313
	0.164931	-0.0303388
	0.164901	-0.0304432
	0.164733	-0.0306035
	0.164179	-0.030614
	0.163506	-0.0312365
	0.163457	-0.0313004
	0.163438	-0.0314305
	0.163	-0.0316268
	0.162049	-0.0316329
	0.161056	-0.0317062
	0.160815	-0.0320569
	0.160575	-0.0322427
	0.160566	-0.0324959
	0.160293	-0.0325051
	0.159878	-0.0325283
	0.159488	-0.0325627
	0.158173	-0.0329257
	0.15766	-0.0329721
	0.157517	-0.0331532
	0.157269	-0.0331656
	0.156949	-0.0337668
	0.156803	-0.0337851
	0.156601	-0.0339659
	0.156201	-0.0340477
	0.156072	-0.0341581
	0.155378	-0.0343592
	0.154882	-0.0347901
	0.154462	-0.034816
	0.154075	-0.034959
	0.153924	-0.0355315
	0.153883	-0.0357405
	0.153831	-0.0358827
	0.153617	-0.0361028
	0.15193	-0.0361355
	0.151726	-0.0362567
	0.1514	-0.036294
	0.151345	-0.0364273
	0.15089	-0.0372742
	0.150752	-0.0376105
	0.149239	-0.0380016
	0.149054	-0.0387923
	0.148732	-0.0389707
	0.148697	-0.0391468
	0.148194	-0.0394986
	0.148161	-0.0401948
	0.148053	-0.0402581
	0.146972	-0.0404501
	0.146969	-0.0409017
	0.146902	-0.0409136
	0.146834	-0.0410563
	0.146449	-0.0420621
	0.145703	-0.0421407
	0.145657	-0.0423575
	0.145619	-0.0423883
	0.145297	-0.0425263
	0.145074	-0.0425779
	0.144524	-0.0427219
	0.144258	-0.0428348
	0.143547	-0.0431615
	0.142475	-0.0431907
	0.141836	-0.0432857
	0.141303	-0.0436236
	0.141184	-0.043886
	0.141048	-0.0440515
	0.140876	-0.0444803
	0.140559	-0.0450675
	0.139899	-0.0452313
	0.139759	-0.0460524
	0.139629	-0.0460918
	0.13957	-0.0462223
	0.139246	-0.0462358
	0.139082	-0.0472262
	0.13826	-0.0472585
	0.138244	-0.047365
	0.1377	-0.0481846
	0.137358	-0.0483974
	0.137197	-0.0484906
	0.13674	-0.0487283
	0.13627	-0.0487648
	0.136126	-0.0491267
	0.135998	-0.0494876
	0.135614	-0.0499728
	0.135521	-0.0500316
	0.135509	-0.0501803
	0.134879	-0.0505218
	0.133765	-0.0507157
	0.133568	-0.0507713
	0.133273	-0.0508824
	0.132783	-0.0509343
	0.13276	-0.0511425
	0.132697	-0.0512014
	0.131821	-0.0512342
	0.131655	-0.0512825
	0.131602	-0.0515379
	0.131561	-0.0517668
	0.131306	-0.0518653
	0.131111	-0.0521469
	0.130949	-0.0521909
	0.130826	-0.0521992
	0.130767	-0.052694
	0.130505	-0.0528374
	0.130163	-0.0530189
	0.129924	-0.0530878
	0.129585	-0.053414
	0.128667	-0.0535321
	0.128195	-0.0537392
	0.128089	-0.0538335
	0.127968	-0.0538433
	0.127698	-0.0539785
	0.127145	-0.0542008
	0.127062	-0.054367
	0.126905	-0.0549305
	0.126903	-0.0556033
	0.126608	-0.0559992
	0.12629	-0.0563607
	0.126279	-0.0563964
	0.125969	-0.0564566
	0.125708	-0.0570466
	0.125396	-0.0573237
	0.12516	-0.0575556
	0.124996	-0.0579736
	0.124855	-0.0579815
	0.124519	-0.0579921
	0.124286	-0.0582064
	0.124089	-0.0583575
	0.123707	-0.0588122
	0.123591	-0.0588794
	0.123473	-0.0589339
	0.123357	-0.0591217
	0.123351	-0.059352
	0.1232	-0.0595695
	0.123128	-0.0600048
	0.123026	-0.0601394
	0.122573	-0.0606082
	0.122373	-0.0607037
	0.122283	-0.0614179
	0.122065	-0.0618865
	0.121545	-0.0620151
	0.12134	-0.0622535
	0.120012	-0.0623429
	0.119992	-0.0623591
	0.119774	-0.0623875
	0.119192	-0.0624772
	0.118811	-0.0629386
	0.118188	-0.0631163
	0.117874	-0.0634068
	0.117644	-0.0636009
	0.117482	-0.0638627
	0.117265	-0.0644357
	0.116245	-0.0651847
	0.115967	-0.0653987
	0.1156	-0.0654966
	0.115539	-0.0655022
	0.115489	-0.065578
	0.115238	-0.0656998
	0.114857	-0.0657041
	0.114804	-0.0659435
	0.114788	-0.0663697
	0.114722	-0.0667112
	0.11459	-0.066772
	0.114444	-0.0672322
	0.114171	-0.0677417
	0.113585	-0.0679813
	0.113526	-0.0696778
	0.113493	-0.0700289
	0.11344	-0.0707718
	0.11338	-0.0708903
	0.113292	-0.0715228
	0.113187	-0.0717524
	0.112933	-0.0717985
	0.112925	-0.0720586
	0.112794	-0.0720785
	0.112307	-0.0724641
	0.111976	-0.0727393
	0.111251	-0.0732934
	0.111062	-0.0746309
	0.110995	-0.0746463
	0.110265	-0.0746694
	0.10997	-0.0751472
	0.109824	-0.0755213
	0.10962	-0.0763801
	0.10926	-0.0766442
	0.109225	-0.0766798
	0.108815	-0.0780125
	0.108721	-0.0782594
	0.107893	-0.0784563
	0.107675	-0.0787608
	0.107648	-0.07894
	0.106855	-0.0791739
	0.106718	-0.0796724
	0.106392	-0.0797067
	0.106334	-0.0798544
	0.105955	-0.0806208
	0.105927	-0.080675
	0.105809	-0.080803
	0.105709	-0.0810681
	0.105692	-0.0811111
	0.105527	-0.0813317
	0.105382	-0.0815384
	0.105121	-0.0822716
	0.104932	-0.0825401
	0.104624	-0.0834601
	0.104055	-0.083814
	0.103733	-0.084285
	0.103625	-0.084668
	0.10361	-0.0849667
	0.102794	-0.0850271
	0.10275	-0.0853414
	0.102371	-0.0857976
	0.101556	-0.0865074
	0.101441	-0.0866268
	0.10132	-0.0866611
	0.101229	-0.0867993
	0.100647	-0.0868265
	0.100322	-0.0876022
	0.100143	-0.0880144
	0.0991541	-0.0887715
	0.0988962	-0.0889831
	0.0988645	-0.0896624
	0.0986874	-0.0897321
	0.0985533	-0.0898804
	0.0985227	-0.0904298
	0.0985121	-0.0905863
	0.098062	-0.0914288
	0.0978276	-0.0918974
	0.097142	-0.0920031
	0.0965176	-0.092097
	0.0960705	-0.0923335
	0.0958078	-0.0927282
	0.0955317	-0.0927457
	0.0954365	-0.0932997
	0.095422	-0.0935628
	0.0951151	-0.0940148
	0.0951028	-0.0941266
	0.0948368	-0.0948692
	0.0940837	-0.0950494
	0.0935136	-0.0956812
	0.0930593	-0.0959595
	0.0925549	-0.095982
	0.0916518	-0.0962065
	0.091356	-0.096417
	0.0909628	-0.0966692
	0.0904731	-0.0971486
	0.0903206	-0.0978399
	0.0902801	-0.0980401
	0.0902408	-0.0985436
	0.090225	-0.0993154
	0.0899928	-0.0998132
	0.0898095	-0.0999292
	0.0897751	-0.100574
	0.0896954	-0.100922
	0.0894691	-0.100962
	0.0881022	-0.101371
	0.0880142	-0.101617
	0.0877587	-0.101888
	0.0875891	-0.102715
	0.087372	-0.103119
	0.0872301	-0.103232
	0.0870327	-0.103288
	0.0869023	-0.103588
	0.086766	-0.103861
	0.0866966	-0.104023
	0.0865162	-0.104031
	0.0861829	-0.104273
	0.0859951	-0.105004
	0.0851919	-0.105027
	0.0849294	-0.105068
	0.0840193	-0.105258
	0.0839734	-0.105518
	0.0839387	-0.106
	0.0837752	-0.106093
	0.0836164	-0.106919
	0.0835701	-0.106943
	0.0832963	-0.10716
	0.0832661	-0.107922
	0.0832177	-0.108335
	0.0830104	-0.108651
	0.0828976	-0.109483
	0.0826589	-0.109616
	0.0826162	-0.10971
	0.0825355	-0.109811
	0.0825355	-0.110014
	0.0817536	-0.110374
	0.0817318	-0.110403
	0.0814592	-0.110517
	0.0814534	-0.110588
	0.0814206	-0.110787
	0.0810482	-0.110983
	0.0803542	-0.111448
	0.0801711	-0.111765
	0.079554	-0.112052
	0.0794106	-0.112274
	0.0793965	-0.113355
	0.0792742	-0.114423
	0.0792291	-0.114501
	0.0789047	-0.114582
	0.078667	-0.114749
	0.0785769	-0.114903
	0.0784874	-0.115352
	0.0784686	-0.11536
	0.0780938	-0.115501
	0.0780514	-0.115995
	0.0779864	-0.116072
	0.0775774	-0.116243
	0.0770743	-0.117381
	0.0769492	-0.117389
	0.0765908	-0.11777
	0.0765493	-0.11787
	0.0762102	-0.11833
	0.0760812	-0.118804
	0.0759416	-0.118844
	0.0758566	-0.119652
	0.0757914	-0.1198
	0.0753702	-0.119931
	0.0753514	-0.11999
	0.0752218	-0.120159
	0.0751291	-0.12061
	0.0747415	-0.120964
	0.0746144	-0.121809
	0.0745783	-0.122004
	0.0743494	-0.122738
	0.0738639	-0.123454
	0.0737431	-0.124183
	0.073589	-0.124347
	0.0734621	-0.125151
	0.0733848	-0.125245
	0.0730184	-0.125913
	0.0730074	-0.126114
	0.0729413	-0.126192
	0.0725904	-0.126846
	0.0724178	-0.127206
	0.0717165	-0.127825
	0.0713213	-0.127837
	0.0703905	-0.128567
	0.070204	-0.128697
	0.069972	-0.12871
	0.0695263	-0.128898
	0.0693252	-0.128943
	0.0690447	-0.129478
	0.069035	-0.130675
	0.0689835	-0.131322
	0.0687367	-0.131504
	0.068707	-0.131509
	0.0686313	-0.131658
	0.0675342	-0.132063
	0.0670952	-0.132201
	0.0668578	-0.132237
	0.0668529	-0.132252
	0.0668352	-0.132717
	0.0664681	-0.132939
	0.0662524	-0.133124
	0.0659557	-0.133491
	0.0654785	-0.133672
	0.0651463	-0.133726
	0.0647764	-0.133876
	0.0644072	-0.134247
	0.0644063	-0.134485
	0.0641164	-0.134728
	0.0639469	-0.134973
	0.0638087	-0.135364
	0.0633526	-0.135666
	0.0632249	-0.13573
	0.0629121	-0.135826
	0.0625187	-0.136261
	0.0623785	-0.136659
	0.06236	-0.136795
	0.062207	-0.13683
	0.0617745	-0.137256
	0.0616618	-0.138048
	0.0615412	-0.138372
	0.0613764	-0.138563
	0.0609775	-0.138643
	0.0601776	-0.139361
	0.0601699	-0.140017
	0.0599976	-0.140072
	0.0593734	-0.140243
	0.0592901	-0.14064
	0.0591147	-0.140963
	0.0590211	-0.141318
	0.0589001	-0.141385
	0.0585476	-0.142271
	0.0584108	-0.142855
	0.0583426	-0.143343
	0.0582035	-0.143463
	0.0575972	-0.14364
	0.0574746	-0.143667
	0.0574319	-0.144677
	0.056617	-0.144822
	0.0561967	-0.144907
	0.0560619	-0.145171
	0.0560403	-0.146091
	0.056004	-0.146425
	0.0559649	-0.14715
	0.0558914	-0.14753
	0.0558877	-0.147531
	0.0558405	-0.14792
	0.0552999	-0.148112
	0.0551621	-0.148242
	0.0551575	-0.148505
	0.0547959	-0.148929
	0.0542268	-0.149359
	0.0541128	-0.14943
	0.0539578	-0.150309
	0.053414	-0.15047
	0.0528797	-0.150544
	0.0526389	-0.150545
	0.0526075	-0.150556
	0.0523034	-0.151204
	0.052242	-0.15137
	0.0518724	-0.151517
	0.0517854	-0.152209
	0.051388	-0.152392
	0.051275	-0.152431
	0.0509557	-0.152444
	0.0506521	-0.152526
	0.0495389	-0.153432
	0.0494914	-0.153664
	0.049476	-0.153737
	0.0493134	-0.153746
	0.0492657	-0.154131
	0.049042	-0.155095
	0.0487055	-0.155419
	0.0484648	-0.155458
	0.048245	-0.155596
	0.0478258	-0.155711
	0.0473842	-0.156004
	0.0473708	-0.156113
	0.0470193	-0.1574
	0.046852	-0.15763
	0.0464107	-0.157969
	0.046354	-0.157981
	0.0460027	-0.158503
	0.0459716	-0.158614
	0.0459019	-0.158674
	0.0459013	-0.158857
	0.0455239	-0.159588
	0.045491	-0.160218
	0.0454812	-0.160396
	0.0451956	-0.160505
	0.0450605	-0.160724
	0.0450096	-0.161054
	0.0442803	-0.161095
	0.04409	-0.161435
	0.0437037	-0.161531
	0.0434001	-0.161575
	0.0433893	-0.163656
	0.0432292	-0.163885
	0.0431439	-0.164603
	0.0431137	-0.16532
	0.0430813	-0.165717
	0.04306	-0.166231
	0.0427436	-0.166442
	0.0426615	-0.167612
	0.0424947	-0.167627
	0.0421635	-0.167949
	0.0419876	-0.168232
	0.0410798	-0.168326
	0.0405943	-0.168998
	0.0405526	-0.169145
	0.0403349	-0.169342
	0.0399457	-0.169416
	0.0398852	-0.17073
	0.0398781	-0.170776
	0.0392403	-0.170837
	0.0389638	-0.171262
	0.0385297	-0.17187
	0.038424	-0.17205
	0.0383085	-0.172835
	0.0376986	-0.173118
	0.0370697	-0.173985
	0.0370352	-0.174479
	0.036919	-0.174822
	0.0363221	-0.175214
	0.0359199	-0.175585
	0.0359072	-0.175601
	0.0355313	-0.176051
	0.03547	-0.176072
	0.0354139	-0.176382
	0.0352557	-0.176998
	0.035018	-0.177118
	0.0349612	-0.177736
	0.0346906	-0.178055
	0.0346262	-0.178061
	0.0341777	-0.17818
	0.0336466	-0.179556
	0.0332751	-0.180375
	0.0329103	-0.181079
	0.0324541	-0.181987
	0.0322898	-0.183091
	0.0322423	-0.183628
	0.0321959	-0.183672
	0.0317673	-0.184225
	0.0310339	-0.184831
	0.0305876	-0.185326
	0.0304964	-0.185828
	0.0304446	-0.185846
	0.0304367	-0.186151
	0.030104	-0.186504
	0.0296109	-0.186984
	0.0293636	-0.187301
	0.0290449	-0.187463
	0.0288037	-0.187695
	0.0284738	-0.187949
	0.028285	-0.188431
	0.0275852	-0.188718
	0.027223	-0.189574
	0.0269233	-0.189887
	0.0269058	-0.190544
	0.0268789	-0.191577
	0.0265763	-0.19202
	0.0265297	-0.192722
	0.0262272	-0.193408
	0.0258426	-0.19512
	0.0257851	-0.19552
	0.0257405	-0.195563
	0.0253732	-0.195676
	0.0251039	-0.195807
	0.0250712	-0.197182
	0.0246936	-0.197232
	0.0246571	-0.197548
	0.0246211	-0.197619
	0.0244551	-0.198746
	0.0244056	-0.198844
	0.0239089	-0.198979
	0.0239022	-0.199272
	0.0235172	-0.199899
	0.023492	-0.200058
	0.0234215	-0.200194
	0.0232428	-0.200229
	0.0232213	-0.200239
	0.0231398	-0.201262
	0.0231391	-0.201517
	0.0231029	-0.202301
	0.0229538	-0.202328
	0.022784	-0.202557
	0.0224597	-0.202779
	0.0219088	-0.203763
	0.0218485	-0.204949
	0.0218085	-0.205417
	0.021767	-0.205456
	0.0215282	-0.205785
	0.0209695	-0.205992
	0.0203455	-0.206118
	0.0199576	-0.206482
	0.0198579	-0.206532
	0.019704	-0.206703
	0.0196288	-0.207412
	0.019475	-0.208149
	0.0192438	-0.208728
	0.0189847	-0.208948
	0.0187127	-0.209018
	0.0184983	-0.209269
	0.0184064	-0.209463
	0.0174729	-0.209634
	0.0174506	-0.21022
	0.0173975	-0.210289
	0.0171615	-0.211695
	0.0171131	-0.211714
	0.0168037	-0.212949
	0.0163288	-0.213438
	0.0159652	-0.213498
	0.0158989	-0.214364
	0.0158528	-0.214653
	0.0157559	-0.214908
	0.0155766	-0.215395
	0.0151263	-0.215775
	0.0150335	-0.215896
	0.0149561	-0.216063
	0.014657	-0.216193
	0.0144413	-0.216424
	0.0144295	-0.216992
	0.0140828	-0.217837
	0.0139307	-0.218844
	0.013246	-0.218993
	0.0132427	-0.219892
	0.0131248	-0.220183
	0.0126866	-0.220199
	0.0120663	-0.220371
	0.0114743	-0.220465
	0.0114545	-0.220889
	0.0114286	-0.221446
	0.0113696	-0.222074
	0.0111535	-0.222541
	0.010935	-0.223247
	0.0103107	-0.223255
	0.010304	-0.22339
	0.0100826	-0.225009
	0.0095249	-0.225697
	0.00891685	-0.225854
	0.0087749	-0.22626
	0.00871746	-0.226333
	0.00821012	-0.226442
	0.00797863	-0.226512
	0.0079087	-0.226631
	0.00771931	-0.226687
	0.00738358	-0.227904
	0.00730105	-0.228158
	0.0069914	-0.228495
	0.00651879	-0.230598
	0.00576312	-0.231529
	0.00564521	-0.231917
	0.00540386	-0.232386
	0.00522076	-0.23251
	0.00509724	-0.233308
	0.00458714	-0.233308
	0.00432664	-0.234174
	0.00387771	-0.23435
	0.00356029	-0.234598
	0.00315458	-0.23581
	0.00296007	-0.236938
	0.0020472	-0.236986
	0.00203339	-0.237279
	0.00193052	-0.23752
	0.00136843	-0.239694
	0.00109283	-0.239764
	0.000922665	-0.241361
	0.000633339	-0.241371
	0.000560257	-0.242821
	0.000543193	-0.243162
	7.21e-05	-0.243697
	-0.000204885	-0.246329
	-0.000540419	-0.248557
	-0.000558239	-0.248631
	-0.000910728	-0.251289
	-0.00106488	-0.251749
	-0.00162428	-0.252259
	-0.00206773	-0.25363
	-0.00231938	-0.254076
	-0.0023963	-0.254373
	-0.00268776	-0.256299
	-0.00294276	-0.256856
	-0.00301829	-0.257582
	-0.00340592	-0.258266
	-0.0043595	-0.258477
	-0.0048381	-0.258881
	-0.00505151	-0.259596
	-0.00524173	-0.260698
	-0.00526902	-0.261905
	-0.00567291	-0.263313
	-0.00586767	-0.26347
	-0.00601747	-0.263913
	-0.00645185	-0.263995
	-0.00647175	-0.264019
	-0.00648256	-0.264304
	-0.00658527	-0.264334
	-0.00660535	-0.26448
	-0.00711709	-0.26506
	-0.00752188	-0.265825
	-0.00753815	-0.266286
	-0.00780005	-0.269657
	-0.00803293	-0.270609
	-0.0088726	-0.270723
	-0.00887345	-0.2726
	-0.009082	-0.272743
	-0.0098214	-0.272772
	-0.0102593	-0.27305
	-0.0114803	-0.273326
	-0.0116342	-0.273528
	-0.0116845	-0.276843
	-0.0117017	-0.278197
	-0.0117609	-0.279051
	-0.0121047	-0.27927
	-0.0126918	-0.279505
	-0.0132648	-0.279824
	-0.0136702	-0.280613
	-0.014077	-0.281233
	-0.0141096	-0.281573
	-0.0142162	-0.281977
	-0.015008	-0.282112
	-0.0151062	-0.285235
	-0.0154033	-0.28739
	-0.0156653	-0.287847
	-0.0159476	-0.289234
	-0.0164055	-0.289965
	-0.0168518	-0.29091
	-0.0172425	-0.292206
	-0.0174247	-0.292678
	-0.0183126	-0.292982
	-0.018421	-0.294806
	-0.0193925	-0.295747
	-0.0197386	-0.296759
	-0.0197626	-0.296889
	-0.019975	-0.297012
	-0.0203623	-0.297284
	-0.0206974	-0.29779
	-0.020852	-0.298056
	-0.0208946	-0.298596
	-0.0214043	-0.299127
	-0.0218965	-0.299474
	-0.022369	-0.299579
	-0.0228175	-0.299834
	-0.0228883	-0.301491
	-0.0229035	-0.302294
	-0.0237552	-0.306614
	-0.0238065	-0.310591
	-0.023903	-0.312783
	-0.0249347	-0.31433
	-0.0249502	-0.314532
	-0.0251877	-0.31624
	-0.0257093	-0.316503
	-0.0257302	-0.316724
	-0.0257689	-0.318877
	-0.0257798	-0.319847
	-0.0261807	-0.320003
	-0.0262692	-0.321191
	-0.0264188	-0.321704
	-0.0270313	-0.322182
	-0.0272734	-0.322357
	-0.0276915	-0.323215
	-0.0279382	-0.325942
	-0.0279881	-0.326057
	-0.0283622	-0.329288
	-0.028742	-0.33006
	-0.0287441	-0.332795
	-0.0294763	-0.333418
	-0.0296294	-0.333535
	-0.0312585	-0.33583
	-0.0313778	-0.338917
	-0.0314509	-0.345988
	-0.0318414	-0.346367
	-0.0323159	-0.347164
	-0.0325699	-0.34757
	-0.0327092	-0.34963
	-0.0331096	-0.349857
	-0.0336018	-0.352414
	-0.0343779	-0.354178
	-0.0343873	-0.354959
	-0.0344722	-0.356503
	-0.0345572	-0.358287
	-0.0352335	-0.358551
	-0.0369508	-0.358606
	-0.0370484	-0.36012
	-0.037089	-0.361576
	-0.0384706	-0.365983
	-0.0387712	-0.369035
	-0.0387922	-0.369914
	-0.0388154	-0.370758
	-0.0388754	-0.374402
	-0.0394565	-0.374628
	-0.0397658	-0.378228
	-0.039801	-0.381236
	-0.0411368	-0.38127
	-0.0414534	-0.381831
	-0.0414853	-0.384099
	-0.041934	-0.38558
	-0.0430354	-0.38709
	-0.0430404	-0.387103
	-0.0433234	-0.389317
	-0.0434829	-0.389905
	-0.0436452	-0.390287
	-0.0438304	-0.390415
	-0.0442106	-0.395175
	-0.044248	-0.399386
	-0.0448158	-0.400585
	-0.0449073	-0.401468
	-0.0454247	-0.402479
	-0.0456473	-0.402822
	-0.0456682	-0.404019
	-0.0461012	-0.405047
	-0.0463527	-0.405156
	-0.0468761	-0.405204
	-0.04715	-0.40651
	-0.047564	-0.406979
	-0.0479288	-0.409258
	-0.0488796	-0.412686
	-0.0490392	-0.413216
	-0.0491381	-0.414236
	-0.0495135	-0.417128
	-0.0496583	-0.42146
	-0.0498494	-0.423251
	-0.0499245	-0.424782
	-0.0500451	-0.427844
	-0.0506664	-0.43637
	-0.0519927	-0.438752
	-0.0522976	-0.442703
	-0.0526505	-0.445243
	-0.0528527	-0.446492
	-0.0533113	-0.446798
	-0.0534825	-0.449274
	-0.0537748	-0.453032
	-0.0545784	-0.454669
	-0.0549686	-0.459062
	-0.0564273	-0.459557
	-0.0566471	-0.461679
	-0.0568534	-0.461754
	-0.0582387	-0.46494
	-0.0586473	-0.467585
	-0.0587478	-0.472733
	-0.0588393	-0.474564
	-0.0589126	-0.477568
	-0.0589821	-0.479927
	-0.0590692	-0.483485
	-0.0595544	-0.484928
	-0.0599128	-0.485642
	-0.0602387	-0.489893
	-0.0604839	-0.490614
	-0.0606306	-0.491241
	-0.0606712	-0.491414
	-0.0610251	-0.491985
	-0.061184	-0.493606
	-0.0613564	-0.498815
	-0.0652368	-0.500154
	-0.0653727	-0.50491
	-0.065456	-0.509919
	-0.0657902	-0.510019
	-0.0661858	-0.5118
	-0.0667223	-0.51283
	-0.0696275	-0.515923
	-0.0697954	-0.516663
	-0.0705222	-0.517282
	-0.0708988	-0.521731
	-0.0710266	-0.522214
	-0.071287	-0.526005
	-0.071582	-0.52955
	-0.0721992	-0.540399
	-0.0724431	-0.541336
	-0.0725046	-0.541799
	-0.0728353	-0.543209
	-0.0739403	-0.551646
	-0.0743691	-0.563053
	-0.0744248	-0.565003
	-0.0745119	-0.570141
	-0.0746019	-0.572891
	-0.0759841	-0.574696
	-0.0763843	-0.582184
	-0.0771319	-0.586931
	-0.0790359	-0.59466
	-0.0793645	-0.597777
	-0.0796416	-0.602396
	-0.0798903	-0.607722
	-0.0800301	-0.610462
	-0.0805865	-0.610482
	-0.0817389	-0.610979
	-0.0819159	-0.64331
	-0.0827025	-0.645226
	-0.0842836	-0.660279
	-0.0846297	-0.670607
	-0.0863777	-0.671794
	-0.0872906	-0.673227
	-0.0877577	-0.674893
	-0.0881897	-0.676872
	-0.0882959	-0.676917
	-0.0889693	-0.680081
	-0.089676	-0.680382
	-0.0900648	-0.704139
	-0.0902023	-0.708393
	-0.0905203	-0.740778
	-0.0908604	-0.754835
	-0.0917863	-0.759102
	-0.0924177	-0.760512
	-0.0925895	-0.761523
	-0.092675	-0.770021
	-0.0929309	-0.772994
	-0.0929677	-0.776262
	-0.0933549	-0.778177
	-0.0943675	-0.778719
	-0.0945815	-0.77952
	-0.0961072	-0.788748
	-0.0963705	-0.791234
	-0.0980766	-0.797977
	-0.098609	-0.799484
	-0.0987288	-0.802417
	-0.0990205	-0.806237
	-0.0991485	-0.806445
	-0.0994515	-0.808933
	-0.0996537	-0.816316
	-0.101067	-0.817546
	-0.101127	-0.819683
	-0.10116	-0.840566
	-0.101508	-0.845855
	-0.101845	-0.904244
	-0.102303	-0.922426
	-0.102308	-0.944022
	-0.102563	-0.952824
	-0.102853	-0.957013
	-0.103172	-0.966855
	-0.103287	-0.979072
	-0.103724	-0.984558
	-0.104458	-0.997368
	-0.104868	-1.02579
	-0.105628	-1.0275
	-0.105675	-1.03791
	-0.106993	-1.04916
	-0.107955	-1.10805
	-0.10825	-1.12021
	-0.108477	-1.12738
	-0.108571	-1.13484
	-0.108631	-1.14348
	-0.108849	-1.18319
	-0.109352	-1.22324
	-0.109729	-1.23812
	-0.109878	-1.25698
	-0.110254	-1.28134
	-0.110609	-1.43705
	-0.112406	-1.45808
	-0.113045	-1.46357
	-0.114072	-1.51242
	-0.114107	-1.54852
	-0.114386	-1.5593
	-0.11475	-1.58066
	-0.115274	-1.62239
	-0.117255	-1.6533
	-0.11776	-1.724
	-0.118275	-1.73543
	-0.118926	-1.759
	-0.119082	-1.96002
	-0.11929	-2.05545
	-0.119343	-2.20522
	-0.119343	-2.2326
	-0.119489	-2.24285
	-0.119718	-2.27553
	-0.119855	-2.28305
	-0.119987	-2.35603
	-0.12015	-2.4878
	-0.120612	-2.61631
	-0.121306	-3.43257
	-0.121451	-4.48903
	-0.121829	-4.76244
	-0.122206	-4.78011
	-0.122678	-5.13074
	-0.122885
	-0.124427
	-0.124472
	-0.125259
	-0.125416
	-0.125487
	-0.1263
	-0.126306
	-0.12648
	-0.126526
	-0.12733
	-0.127649
	-0.128272
	-0.128868
	-0.130095
	-0.130124
	-0.130124
	-0.130362
	-0.131378
	-0.132314
	-0.13273
	-0.13282
	-0.133034
	-0.134566
	-0.134778
	-0.135329
	-0.13572
	-0.136281
	-0.136388
	-0.136705
	-0.136849
	-0.136986
	-0.13749
	-0.137547
	-0.138194
	-0.139084
	-0.139444
	-0.139465
	-0.140026
	-0.141181
	-0.141207
	-0.14218
	-0.142609
	-0.14287
	-0.143656
	-0.144051
	-0.144759
	-0.146165
	-0.146799
	-0.14687
	-0.147401
	-0.147612
	-0.148115
	-0.148198
	-0.148555
	-0.148701
	-0.148728
	-0.148827
	-0.149162
	-0.149195
	-0.149868
	-0.149921
	-0.150149
	-0.150202
	-0.150511
	-0.15087
	-0.151004
	-0.151628
	-0.151877
	-0.152072
	-0.152766
	-0.152914
	-0.153192
	-0.154103
	-0.15421
	-0.154943
	-0.155329
	-0.156095
	-0.158762
	-0.15941
	-0.160324
	-0.16069
	-0.161406
	-0.162647
	-0.162765
	-0.162817
	-0.163298
	-0.163722
	-0.163961
	-0.164675
	-0.166431
	-0.167523
	-0.16775
	-0.16778
	-0.168911
	-0.169667
	-0.171055
	-0.171191
	-0.172228
	-0.172617
	-0.173263
	-0.173825
	-0.173965
	-0.174192
	-0.174515
	-0.174609
	-0.175333
	-0.175564
	-0.177418
	-0.177667
	-0.177879
	-0.178132
	-0.179584
	-0.179798
	-0.180238
	-0.180715
	-0.180875
	-0.181828
	-0.182612
	-0.18331
	-0.183487
	-0.183806
	-0.185615
	-0.186532
	-0.186536
	-0.187169
	-0.187271
	-0.188224
	-0.188978
	-0.189545
	-0.189602
	-0.190899
	-0.193998
	-0.195433
	-0.197141
	-0.197286
	-0.197532
	-0.197585
	-0.199102
	-0.199444
	-0.199857
	-0.200243
	-0.200748
	-0.200907
	-0.204512
	-0.20472
	-0.205574
	-0.206939
	-0.207893
	-0.208332
	-0.208589
	-0.208782
	-0.208923
	-0.209296
	-0.209712
	-0.209787
	-0.21183
	-0.211857
	-0.211956
	-0.212411
	-0.214569
	-0.216009
	-0.216337
	-0.217489
	-0.218205
	-0.219215
	-0.219504
	-0.220001
	-0.220286
	-0.221008
	-0.221048
	-0.222048
	-0.222465
	-0.22249
	-0.222609
	-0.223054
	-0.223235
	-0.224191
	-0.224352
	-0.224405
	-0.22557
	-0.226201
	-0.226333
	-0.226738
	-0.227863
	-0.229249
	-0.229669
	-0.230578
	-0.230695
	-0.231131
	-0.231666
	-0.231739
	-0.231961
	-0.232183
	-0.232479
	-0.232835
	-0.233163
	-0.233252
	-0.233987
	-0.234406
	-0.235509
	-0.235557
	-0.23658
	-0.238041
	-0.238128
	-0.239543
	-0.240091
	-0.240271
	-0.240401
	-0.242079
	-0.243442
	-0.243832
	-0.245073
	-0.245417
	-0.245443
	-0.246167
	-0.247374
	-0.247937
	-0.24879
	-0.249141
	-0.249215
	-0.249297
	-0.250007
	-0.250234
	-0.250283
	-0.251205
	-0.251675
	-0.252568
	-0.252619
	-0.252709
	-0.25327
	-0.253645
	-0.254233
	-0.254398
	-0.254511
	-0.255146
	-0.256484
	-0.256835
	-0.257269
	-0.25829
	-0.258336
	-0.258713
	-0.258833
	-0.262519
	-0.264078
	-0.264186
	-0.264759
	-0.265315
	-0.265928
	-0.265941
	-0.266026
	-0.266063
	-0.268559
	-0.26915
	-0.269244
	-0.269986
	-0.270341
	-0.271172
	-0.271366
	-0.271599
	-0.27327
	-0.27496
	-0.280153
	-0.280444
	-0.280919
	-0.281417
	-0.282022
	-0.284111
	-0.285494
	-0.285625
	-0.28869
	-0.291242
	-0.292611
	-0.293951
	-0.294873
	-0.29505
	-0.298885
	-0.301557
	-0.30371
	-0.304907
	-0.305613
	-0.306744
	-0.30694
	-0.308059
	-0.310367
	-0.311254
	-0.313019
	-0.314241
	-0.316277
	-0.317423
	-0.322804
	-0.324325
	-0.326353
	-0.326423
	-0.32712
	-0.33032
	-0.331879
	-0.333948
	-0.339215
	-0.340006
	-0.341364
	-0.341435
	-0.341465
	-0.342184
	-0.344775
	-0.345254
	-0.346417
	-0.347288
	-0.349758
	-0.350897
	-0.351945
	-0.353344
	-0.354327
	-0.359331
	-0.359332
	-0.35986
[truncated: 101 more rows]
